# Supplementary material for: Distinct immune responses in patients infected with influenza or SARS-CoV-2, and in COVID-19 survivors, characterised by transcriptomic and cellular abundance differences in blood
Source: medRxiv preprint, doi:10.1101/2021.05.12.21257086, version 1 (2021-05-15)
Supplement: Additional file 2: Differential gene expression results between patients with COVID-19 or influenza. [file 257086_file04.xlsx]

## Sheet: DGE results COV versus FLU
Gene	PValue	Log10_PValue	FDR_PValue	Log_fold_change	Log_CPM	CoV001	CoV002	CoV003	CoV004	CoV005	CoV006	CoV007	CoV008	CoV009	CoV010	CoV011	CoV012	CoV013	CoV014	CoV015	CoV016	CoV017	CoV018	CoV019	CoV020	CoV021	CoV022	CoV023	CoV024	CoV025	CoV026	CoV027	CoV028	CoV029	CoV030	CoV031	CoV032	CoV033	CoV034	CoV035	CoV036	CoV037	CoV038	CoV039	CoV040	CoV041	CoV042	CoV043	CoV044
IGHV4-34	6.34243e-43	-42.1977	1.30286e-38	-3.20788	4.35688	3.1563	4.64573	1.22465	6.5626	3.67608	3.44754	4.56368	7.20266	2.00081	3.72041	6.31305	7.61429	7.61429	7.61429	6.4239	0.210975	0.913388	3.99413	5.31552	2.28731	-0.167713	4.6158	6.51908	2.57279	-0.0505548	3.75231	4.61854	5.32661	3.78444	3.45261	0.108709	3.20254	3.14913	3.59305	3.28483	3.23515	3.15123	0.716073	4.62178	2.39268	5.20702	2.52915	3.92007	3.21853
IGLV3-19	7.83489e-34	-33.106	8.04722e-30	-3.23881	3.16554	2.54446	4.22407	0.967696	6.86993	2.06906	2.37476	1.1578	7.21576	-1.6763	4.29805	4.85036	2.37793	2.37793	2.37793	5.06612	-1.0215	0.191583	1.93482	4.6731	2.41043	0.791728	4.47354	6.77883	1.69192	-0.441216	3.2719	2.98344	4.84789	0.882943	2.3158	-0.0630846	2.2974	4.49217	0.607178	2.08291	2.14325	2.08963	-1.00357	3.21705	0.402484	4.71023	1.77098	2.88817	2.63369
IGHV1-24	1.31393e-32	-31.8814	8.99692e-29	-3.64166	2.46483	0.831326	1.9087	2.01889	4.53573	1.96473	3.08097	-0.670686	1.89599	-2.46497	3.15454	3.23062	1.25872	1.25872	1.25872	4.55345	-1.66518	-0.488516	0.582559	4.50191	3.67876	-2.3058	1.90029	1.86585	0.402678	-2.99184	1.28379	3.61356	3.94364	-1.14183	0.981802	-2.55295	3.76807	3.4046	3.52363	3.34865	3.8851	0.0242815	-1.57629	1.46869	0.182261	3.859	2.32748	3.48089	1.36675
IGHV5-51	2.83814e-24	-23.547	1.28658e-20	-2.31297	3.55825	3.96023	5.78609	3.01007	5.61672	3.80756	4.79182	1.68292	3.899	1.37672	5.00898	3.69958	3.99608	3.99608	3.99608	2.98439	-1.15753	1.59223	2.23296	6.10086	2.90512	1.13081	4.17045	3.29159	3.19079	0.256548	3.28205	4.38874	3.5054	1.65322	1.73241	-0.611322	4.83507	3.4806	3.21269	5.71304	3.42253	4.26869	0.642465	3.57425	1.67491	4.2596	2.63787	3.08064	3.2694
AL109659.2	3.13158e-24	-23.5042	1.28658e-20	3.26997	2.86127	0.786813	-4.34055	-1.44581	-0.792379	1.42426	-0.577873	1.00615	1.35465	2.00081	-0.614575	-0.620872	0.623553	0.623553	0.623553	-0.766046	2.47134	-0.845121	-1.48786	-0.23679	0.0896315	-0.0488636	-1.06821	-0.215517	0.402678	-1.21387	0.272611	0.164897	-1.84933	1.16861	-1.33657	0.80242	1.06925	-0.108229	-1.36033	-1.672	-0.556772	-1.54015	0.679738	-1.08009	3.09502	-1.22794	0.812462	-0.381105	-0.684824
MTND1P23	2.64814e-23	-22.5771	9.06636e-20	-3.09527	3.18807	0.831326	8.27955	1.47602	0.783634	0.730555	-0.189656	1.64234	0.049131	0.743676	0.209464	0.269	-0.330951	-0.330951	-0.330951	0.952108	-0.0288923	0.191583	1.77752	0.993094	2.12099	1.40517	0.893929	8.90894	0.788166	0.0592382	0.918036	1.32504	0.886988	0.695804	1.84495	-0.157316	-0.0804082	0.883061	0.195787	0.785978	1.67883	1.31582	-0.349697	-0.157403	1.31146	0.455068	1.20691	0.689864	1.51866
IGHV3-33	3.50893e-22	-21.4548	1.02972e-18	-2.4178	1.67436	0.831326	1.84249	1.66133	5.14859	1.79258	0.406014	-0.392537	1.24988	-1.03337	3.59387	1.26712	1.30092	1.30092	1.30092	2.2104	-1.0215	-0.655828	0.886408	4.03698	1.85802	-0.439553	1.23362	1.85046	-0.544436	-2.30715	0.00507972	3.0932	1.9551	-0.22262	0.737115	-1.08001	1.2354	0.585515	2.32199	1.42972	0.700897	1.04874	-1.00357	1.79651	-1.51973	3.308	1.32724	2.27059	0.741638
IGHV2-5	9.97424e-20	-19.0011	2.56113e-16	-2.19799	2.43135	4.31003	3.67734	0.819733	5.42761	3.43057	0.854157	0.271494	0.880319	-1.03337	4.13823	1.54363	2.69514	2.69514	2.69514	2.47087	-2.14142	1.45522	2.32428	4.05691	0.0896315	0.0609361	3.40241	3.55626	1.30968	-2.99184	-0.452239	2.95879	2.67519	-0.382196	1.8294	0.527476	2.92695	1.68667	1.08947	3.96016	3.32217	2.14557	-0.0159224	0.711941	-0.325824	2.86015	0.437861	2.79461	1.89698
IGHV1-18	1.45799e-19	-18.8362	3.32778e-16	-1.94449	2.65894	2.41883	3.32806	2.57509	4.6336	2.96463	3.56987	0.60288	2.20711	-0.0414162	3.51352	3.10449	2.00941	2.00941	2.00941	3.06089	-1.88374	0.54023	3.79416	4.2768	2.28731	0.511333	3.66057	2.85605	2.31215	-1.21387	0.752814	4.27021	3.868	1.13953	2.8272	-0.483742	4.26743	2.34779	2.13604	2.74521	2.93733	3.38995	0.254956	2.95335	1.10105	3.3244	2.14303	3.22458	2.39275
JUN	3.12572e-19	-18.5051	6.42085e-16	-0.947488	3.03642	2.76702	3.79288	1.50861	4.26892	3.48816	2.80308	2.69181	5.06047	2.27404	4.17887	4.04081	2.86648	2.86648	2.86648	3.01355	2.44809	2.11834	3.39745	4.2453	3.3704	2.5694	4.16517	3.06375	2.24332	2.18715	3.36073	4.14472	3.16967	3.65167	2.77133	2.9173	3.37272	3.95215	3.71432	3.88037	4.02736	3.60971	1.98966	3.24954	0.628845	4.00863	3.67813	3.34348	2.68813
IGLV4-69	5.99875e-19	-18.2219	1.12024e-15	-2.29137	1.43647	1.56982	2.20064	2.65003	4.61299	3.48187	0.798049	1.2686	0.880319	-1.16926	2.79542	0.375647	0.975816	0.975816	0.975816	0.781763	-4.34055	-0.488516	1.86702	3.08726	1.12133	-0.167713	3.52288	1.81919	0.580624	-2.30715	0.810016	2.74481	1.43896	-1.6503	-0.673393	-1.77866	2.73217	1.59845	-0.454766	0.545773	1.3875	-0.6476	-0.426831	1.85399	-0.900036	0.742353	0.490361	-0.160619	0.656834
IGKV3-15	2.05523e-18	-17.6871	3.51821e-15	-1.80897	4.22093	5.78497	5.43183	3.51399	6.3894	3.64828	5.541	4.67348	3.89031	1.24925	5.18091	5.08654	3.55229	3.55229	3.55229	3.69193	-0.676741	3.24687	4.01778	5.41153	4.65952	2.71087	5.75804	8.11965	3.80036	2.97032	2.84912	6.53116	3.42935	2.34333	3.54118	0.945305	3.68432	4.17592	3.60206	5.02581	3.97047	3.3666	2.14432	4.99835	3.39104	4.2961	3.11836	4.70743	3.46914
IGHM	7.82669e-18	-17.1064	1.23674e-14	-1.56347	8.5152	10.3004	10.2861	8.60837	10.7367	10.2029	9.80843	7.82685	8.75775	7.29927	9.46126	9.419	8.83535	8.83535	8.83535	8.51451	4.87518	6.41738	8.07715	9.32767	8.76883	5.59125	10.4633	9.65722	8.58093	6.18458	7.08476	9.48985	9.42985	7.0894	7.86541	5.0747	8.80491	9.30539	8.94395	9.40343	8.01926	7.55506	5.00726	9.52401	7.0247	9.22865	8.00071	9.08967	8.46855
IGKV1-27	2.52057e-17	-16.5985	3.6984e-14	-1.98113	2.80632	2.01788	3.56549	0.967696	6.21408	2.60851	2.48548	1.2686	4.23034	0.304776	4.60888	3.0889	2.5097	2.5097	2.5097	2.77327	-2.45536	1.18504	1.90132	3.08726	2.60632	1.59966	4.62352	4.44983	2.7569	-1.84472	0.631119	2.95048	2.23696	0.917625	1.76547	-0.751289	2.00693	2.3799	1.81815	3.23842	3.26249	2.14557	1.12023	3.21705	1.39596	2.59758	1.83328	2.11038	3.39253
AC009974.1	2.32605e-16	-15.6334	3.18545e-13	-1.55941	0.525724	0.593606	1.36499	1.10189	2.20965	-0.771032	-0.24753	-1.46974	-1.00806	-0.108146	1.73107	0.959447	-1.30603	-1.30603	-1.30603	-0.523337	0.678717	-0.411615	0.851747	-0.30299	0.384827	0.658332	0.223509	1.35745	-0.427586	-1.84472	0.426857	2.49346	-1.13612	1.56845	1.28515	0.586817	0.102795	-0.367794	1.08947	2.50872	1.55163	0.792577	-0.349697	0.280205	-0.900036	2.44588	0.683114	-0.0940245	2.36629
IGKV1-8	5.10356e-16	-15.2921	6.55234e-13	-1.79241	1.25444	0.177069	-0.467813	-0.686718	3.18109	0.643123	2.00513	-0.233036	3.00382	-0.688887	2.5695	0.0286741	1.34191	1.34191	1.34191	1.20899	-3.41607	-1.63253	0.624229	3.48557	2.07209	-0.439553	1.72479	1.46238	1.69192	-2.99184	-0.205534	-0.306682	0.719402	-0.766624	1.06382	-0.906307	-0.290306	1.02519	1.34692	0.892578	1.0537	0.138963	-0.349697	0.476002	-0.625609	1.34557	3.44531	1.02558	0.313282
IGHV1-46	5.56439e-16	-15.2546	6.72374e-13	-2.0585	2.43424	1.51629	3.26205	3.66617	4.2853	2.62001	3.03316	0.271494	2.43926	-0.32913	2.91573	1.02646	1.34191	1.34191	1.34191	4.89906	-1.47541	0.788576	0.779822	3.75732	2.16828	0.726571	2.22856	3.33645	1.46889	-1.21387	1.01853	5.05046	2.00151	0.613577	0.981802	-0.258136	2.2974	2.6139	2.83119	2.2257	1.88637	1.58221	-0.276478	2.16915	0.793644	3.4343	1.63768	2.30801	1.89698
SRGAP2	7.44005e-16	-15.1284	8.1893e-13	1.23663	6.92959	7.26643	6.18493	5.92144	5.5998	6.99685	5.46533	6.0286	5.93186	7.2414	5.46842	5.77799	6.30605	6.30605	6.30605	5.4436	7.1634	6.33678	5.54255	5.49547	5.52818	5.39554	4.74881	5.62474	6.52484	5.24195	5.78981	5.84377	6.39993	6.88442	5.92007	6.62856	6.76943	5.90155	5.374	5.34965	6.17737	5.95854	5.96334	5.91522	7.53546	5.5621	6.00691	5.82593	6.61097
C12orf75	7.57457e-16	-15.1206	8.1893e-13	-0.809504	3.89122	2.07453	4.5487	4.49469	4.37063	3.48187	3.63937	3.78279	1.9303	3.12131	3.96778	3.41072	4.22972	4.22972	4.22972	4.61182	2.47134	4.72832	4.27485	5.14288	4.56255	3.36359	4.61773	4.77519	3.89876	4.13205	3.72282	4.14835	4.69249	2.5564	3.51712	3.38673	4.33764	4.17592	4.66293	3.49682	4.10114	3.61962	3.88334	3.89841	3.50481	2.66783	4.17164	4.32179	4.46592
IGHG3	8.28379e-16	-15.0818	8.50828e-13	-2.13248	5.8528	3.79588	5.67157	6.28811	9.17707	4.42071	4.61231	6.57631	7.1399	2.1367	7.37096	7.2919	7.68395	7.68395	7.68395	8.51323	2.22005	4.71766	4.27812	6.41327	3.9463	3.41619	6.60828	8.50259	5.08028	2.087	7.81658	7.54499	6.8207	5.90244	5.4064	1.53305	6.70182	5.49671	4.19403	4.95583	3.97047	4.94695	2.31985	5.32747	2.89905	7.32181	4.27252	6.08857	2.91504
AC091117.3	9.83359e-16	-15.0073	9.61912e-13	1.6799	2.05482	0.429568	0.296705	2.52818	0.543442	1.52552	-1.22226	-1.15168	-2.84757	0.852958	0.14528	0.269	0.895482	0.895482	0.895482	2.2436	1.48413	1.61078	-0.498981	0.907865	1.02185	3.06727	-0.972001	-1.47937	1.90746	0.58498	-0.925651	0.327747	-0.216577	0.613577	1.45689	2.03719	1.58245	-0.4407	0.838206	-0.173303	0.778698	1.80699	2.58837	-1.31333	2.04565	-0.613812	-0.230091	-0.549365	1.03836
IGLV2-11	1.17406e-15	-14.9303	1.09626e-12	-1.7807	3.88446	3.68503	4.64249	3.66617	4.82493	4.88817	4.26961	2.45461	3.17096	1.0185	4.48469	3.79395	2.64689	2.64689	2.64689	3.42156	-1.47541	2.20636	3.59899	4.31868	3.41683	2.39166	4.98737	3.47833	3.00577	4.00746	1.78956	4.27355	2.94589	1.63249	2.65265	1.64896	3.80158	3.92339	2.6692	3.47412	3.71743	2.7434	1.81641	4.16576	2.18278	3.43933	3.59066	4.22729	3.43771
IGKV2D-29	1.2586e-15	-14.9001	1.12409e-12	-1.82466	0.970273	-0.129198	1.23338	0.254803	2.78026	0.597337	1.17371	-1.30196	1.0769	-1.6763	1.89618	0.212567	4.18536	4.18536	4.18536	3.03267	-1.30774	-0.655828	-0.109324	0.425909	0.951495	1.18031	2.3452	-0.501047	-0.319495	-4.34055	-0.593457	1.74582	0.369136	-4.34055	0.560012	-2.11447	1.5194	0.430623	-0.454766	1.90757	0.438631	1.16157	-1.97918	1.60887	-0.135879	2.86015	0.589954	1.54761	0.256774
IGHV3-30	1.67872e-15	-14.775	1.43685e-12	-1.81676	2.36857	3.67285	-0.165717	2.7351	5.60373	0.890967	3.79797	1.72239	1.13689	-1.48679	4.32727	2.41114	2.21095	2.21095	2.21095	1.9131	-1.0215	1.43454	3.36709	3.06775	3.1912	1.18031	3.86977	2.16844	0.0464664	-0.169397	4.10066	2.6556	1.47888	1.56845	2.88099	-1.27753	1.78366	1.84841	2.64325	3.57361	2.49402	3.45227	0.440122	2.07558	1.5514	3.72947	1.7279	4.50749	2.22616
LINC01484	2.02423e-15	-14.6937	1.66327e-12	-1.47521	0.682587	-1.41995	1.16278	-0.686718	2.57185	0.102796	1.30028	1.53559	1.89599	-4.34055	2.12972	0.924739	0.720004	0.720004	0.720004	1.06784	0.86579	-1.81858	1.04823	1.12483	1.18404	-0.597457	2.05673	1.54115	0.523713	0.161263	1.67106	1.87438	-0.446448	0.735224	-0.356465	-1.50644	0.83041	0.585515	0.570933	1.47617	1.43633	0.245196	-1.41043	1.46869	-0.259691	1.90671	0.00458762	0.571763	0.934107
ARNTL2	3.14072e-15	-14.503	2.48141e-12	-0.785955	1.35209	1.71942	1.56985	1.26335	2.31547	1.68724	2.34569	3.27972	1.0769	0.583763	1.21006	1.3739	1.63366	1.63366	1.63366	1.14014	1.1223	2.52276	2.06156	1.76498	1.69534	1.22818	2.06809	2.25278	1.09207	0.912091	2.00084	2.17469	2.01966	1.54646	0.268676	1.78186	1.15472	1.07835	0.71075	1.38172	1.65839	0.48089	1.39134	1.13938	1.49506	0.774552	0.589954	1.72408	0.969701
LETM2	4.13253e-15	-14.3838	3.10639e-12	-0.774426	3.8719	3.24946	4.81354	2.47969	4.47422	5.13847	4.01349	2.76923	4.6513	3.10668	4.45521	4.59566	3.57825	3.57825	3.57825	3.97495	4.13765	3.00884	4.55354	3.21102	3.95532	3.15655	5.75453	3.71334	3.30496	3.57091	4.65916	4.33549	3.20975	4.1516	4.48452	4.01874	3.9702	3.69997	4.40947	4.197	4.86273	4.33033	4.15883	4.30625	2.78618	4.22797	4.44869	4.71674	3.95539
RGS16	4.2342e-15	-14.3732	3.10639e-12	-1.0571	0.287715	-0.761282	-0.165717	0.00365547	0.307349	1.19754	0.826376	1.46754	0.38223	-0.178113	1.04398	2.50811	0.484021	0.484021	0.484021	-0.222025	-0.316753	0.376413	1.3755	1.41983	0.914989	-1.21229	0.340546	0.447663	-1.5624	-0.441216	1.43691	1.16187	0.340537	0.570636	-1.64865	1.53305	0.102795	0.657141	0.0454021	0.710268	0.852516	-0.55552	-0.686571	0.400841	-1.00448	0.641205	-0.617553	0.397565	-0.298692
WAKMAR2	5.36511e-15	-14.2704	3.70718e-12	0.845836	2.8547	3.19939	1.42654	2.30519	2.11024	1.70894	2.74491	2.76923	3.30775	2.5148	2.31617	1.94102	2.37793	2.37793	2.37793	1.78365	2.9146	2.2425	1.86702	1.61171	2.27296	2.2129	2.05673	2.55757	2.07527	2.00705	1.76084	1.56167	2.33445	2.58904	2.71321	2.65152	2.97473	2.40091	2.4671	1.87327	1.85079	1.89121	3.2583	2.26763	2.4232	2.25367	2.0055	2.33243	2.44427
IGLV3-25	5.41404e-15	-14.2665	3.70718e-12	-2.35791	4.00522	2.21554	4.07346	2.16913	7.06365	3.08563	4.17915	2.03608	4.03133	-0.909173	5.01348	3.82251	2.61379	2.61379	2.61379	2.98439	-3.41607	1.18504	2.61005	6.29588	4.89563	0.34764	5.25177	4.46506	2.11434	0.256548	4.39046	5.33213	4.45301	1.10984	1.26217	0.945305	2.75971	2.64065	4.45244	3.89327	3.18603	3.46332	0.254956	4.04136	2.8698	5.12198	1.66077	5.11711	2.11928
PYCR1	1.19374e-14	-13.9231	7.68346e-12	-1.15544	0.919815	0.0320472	2.18291	0.654842	2.8871	-0.18654	1.35964	2.34508	1.35465	-0.79483	1.38701	1.94102	0.975816	0.975816	0.975816	1.17498	-0.485548	1.53509	1.3997	2.21869	1.58349	-0.167713	2.18748	2.11793	0.338127	-0.298914	1.78956	2.59292	1.07233	0.613577	0.314074	-0.906307	1.2354	0.97001	0.677046	1.38172	0.888056	0.605793	-0.0767838	0.802331	-0.467944	0.774552	-0.410854	0.571763	0.313282
TTC21A	1.19692e-14	-13.9219	7.68346e-12	1.48916	4.5394	3.63568	3.05349	2.44644	2.53946	4.26835	2.93901	2.82469	3.47977	4.49422	3.40806	2.27998	2.98768	2.98768	2.98768	1.97371	4.82643	3.63457	3.29152	2.05655	3.95532	3.75528	2.61677	2.58572	5.0654	2.21113	3.6851	3.08563	3.31273	3.95692	3.1361	5.09273	2.70409	3.83736	3.03784	2.30505	3.14988	2.63031	3.40462	3.47239	5.71885	2.82214	2.67236	3.04415	4.52094
SRGAP2B	1.46582e-14	-13.8339	9.12452e-12	1.25837	4.05433	4.47694	2.20064	2.47969	2.53946	4.14647	3.2102	2.94635	3.14198	4.21599	2.4682	2.83222	3.41014	3.41014	3.41014	2.35412	4.41748	3.5744	2.91712	2.66206	3.02985	2.67678	2.09055	2.5385	2.66778	2.34724	2.87616	3.11567	2.87786	4.34874	3.05151	4.28821	4.30062	2.99871	2.4671	2.51985	3.68243	3.30037	3.22086	2.84411	4.54163	2.39501	2.71711	2.92878	3.74041
IGLV3-1	1.86747e-14	-13.7287	1.12828e-11	-1.9855	3.64834	3.40481	4.56932	2.89154	7.11493	2.86188	5.11252	0.685087	4.71172	-0.251646	4.87192	3.75989	3.92029	3.92029	3.92029	3.12465	-2.14142	1.41356	5.02727	5.26501	5.513	0.791728	5.5347	5.77898	2.34537	0.789996	3.48008	4.76315	2.59271	1.84561	2.3158	1.7036	3.92226	4.0452	3.65496	4.17253	1.90384	3.94926	1.79958	3.49063	2.30799	4.34517	2.56631	3.71713	2.9688
IGLV2-8	2.08273e-14	-13.6814	1.22239e-11	-1.61018	3.15292	3.39743	5.33883	2.66456	3.88228	3.48816	4.91234	0.217269	3.71444	1.22234	4.96084	4.41988	4.70663	4.70663	4.70663	5.20953	-1.47541	1.59223	2.49122	5.01626	4.0169	2.5694	3.86327	3.09673	2.48608	0.852335	2.4952	3.61882	4.35096	1.27943	2.33795	0.586817	1.83635	3.11774	3.68918	2.87223	3.49922	2.69735	0.303523	4.13999	1.62327	3.22886	3.95526	2.81208	3.55951
IGKV3D-20	2.44186e-14	-13.6123	1.39335e-11	-1.76682	0.645712	0.593606	4.02949	0.175847	4.49689	2.22773	1.32034	0.217269	-0.225162	-1.89452	-0.614575	-0.108386	1.00163	1.00163	1.00163	-1.05801	-2.14142	-0.488516	-1.17037	0.785781	0.877535	-1.84325	2.2184	2.8249	-0.319495	-2.30715	-1.12567	1.19038	-0.0944039	-1.29225	-0.0967741	-2.55295	0.544027	-0.598594	-0.246384	-0.406253	2.63666	-0.965416	-0.889987	1.37362	-1.11708	-0.456046	-0.230091	-0.160619	1.00444
CYP27A1	2.85624e-14	-13.5442	1.58575e-11	-1.18994	5.03857	6.05625	5.90034	5.37437	6.55451	3.37059	4.37405	3.74974	5.0449	5.20208	6.3648	5.6161	3.65752	3.65752	3.65752	4.89646	5.28579	3.88755	6.02229	4.62273	4.31887	4.75672	5.0111	5.79111	2.98483	3.63438	4.3998	7.00237	3.69524	6.30659	6.30795	5.00299	4.91379	3.68719	5.5414	7.07599	5.51453	5.80417	3.72298	4.82052	3.69607	6.64046	5.67111	4.79789	6.4143
UAP1	3.40135e-14	-13.4683	1.8387e-11	-0.718769	3.36226	2.55777	3.93204	2.52818	4.91816	3.63135	4.00731	3.27972	3.60187	2.55848	3.84687	3.41698	3.89296	3.89296	3.89296	3.25246	2.32588	3.3772	3.25219	3.56659	3.46813	2.45337	4.66338	4.33845	2.89793	2.45161	3.14426	4.36705	3.78288	2.64185	2.90344	2.65152	3.34571	4.21205	3.85661	3.79591	3.47606	3.03755	2.97318	3.84624	2.95582	3.50797	2.9411	3.54498	3.2694
OR2B6	3.68787e-14	-13.4332	1.94247e-11	-1.14708	1.69671	1.31157	2.25256	0.967696	2.83467	2.90009	2.52058	1.1578	2.20711	-0.79483	3.14637	2.19515	1.30092	1.30092	1.30092	0.588577	2.04517	0.578434	2.12099	2.10841	2.13693	-0.0488636	3.05387	1.77098	1.46889	1.07781	2.83541	2.85576	1.28238	1.65322	0.358086	2.5207	3.18233	0.997866	2.14839	3.74938	2.11353	0.565349	0.0986003	2.85118	-0.625609	2.99608	0.490361	2.21914	0.566733
DLEU7	5.0531e-14	-13.2964	2.55504e-11	0.785326	1.60422	2.57096	0.4229	0.711926	0.957153	0.92843	0.881414	2.02033	1.35465	2.27404	0.895806	0.0286741	1.53104	1.53104	1.53104	1.42698	1.91556	0.615653	1.19371	1.29112	0.799578	1.18031	0.516699	1.44199	1.55662	0.345927	2.00084	0.606901	1.23655	1.7717	1.35197	0.80242	1.5194	0.548323	0.71075	0.408792	1.11497	2.11787	0.204697	0.615507	1.97874	-0.123802	1.49079	0.0305957	0.860171
CDC6	5.09964e-14	-13.2925	2.55504e-11	-0.795766	2.49391	2.29715	2.79801	2.46316	4.02169	2.59693	2.86584	2.92959	3.06686	1.53815	3.16267	3.40443	2.61379	2.61379	2.61379	2.81804	1.75433	4.28992	2.41016	3.08079	2.16828	1.83424	3.24115	2.61332	1.9727	1.31764	3.00423	3.66526	2.74232	2.31759	1.39486	2.56564	2.91475	2.34779	2.42711	2.96473	3.1203	1.82423	2.80626	2.05121	1.33305	2.56112	1.85346	2.45981	2.11928
ISYNA1	6.99372e-14	-13.1553	3.37656e-11	-0.539278	2.68975	3.11188	2.78631	2.89154	3.26932	3.20493	2.95192	3.18401	3.42066	2.16523	3.58785	2.85083	2.25454	2.25454	2.25454	2.86146	2.24724	2.49306	3.25219	2.96601	2.18371	2.51255	3.19008	2.87137	2.5009	2.43133	3.2514	3.0236	2.80646	3.48246	3.25144	2.74566	2.746	3.07915	3.39996	3.29782	3.44656	2.3137	2.81467	2.71043	2.04565	3.12655	2.69491	2.93676	2.49401
IGKV5-2	7.06806e-14	-13.1507	3.37656e-11	-1.7308	0.224434	-0.518506	0.538938	-0.418203	3.71832	0.102796	1.32034	-1.46974	-0.0815063	-1.16926	-0.730228	-0.341992	-0.695546	-0.695546	-0.695546	-0.639594	-3.41607	-2.03223	0.664728	2.61802	0.674125	-0.29724	1.33113	0.929853	-0.544436	-4.34055	-0.750014	-0.229121	-0.0944039	-2.84583	-0.356465	-4.34055	-0.290306	0.161792	-0.246384	0.545773	-0.876407	0.138963	-1.57629	-0.275732	-0.802644	1.18714	-0.410854	0.571763	0.566733
IGHV3-74	8.4237e-14	-13.0745	3.93272e-11	-1.75201	1.01405	2.34399	1.19851	0.400825	2.39003	3.21254	1.27994	0.644569	-0.225162	-0.909173	2.0618	0.153835	0.780899	0.780899	0.780899	0.481329	-1.88374	-0.202818	-0.910302	1.76498	-0.668387	-0.167713	1.75322	0.0227316	0.688124	-0.978629	-0.205534	1.0102	1.83722	-0.881184	0.770068	-2.55295	0.83041	0.210222	-0.00842391	0.74862	1.08466	-0.55552	-1.97918	1.55789	-0.802644	0.241307	0.00458762	-0.303805	0.612487
IGKV1-9	9.29352e-14	-13.0318	4.24239e-11	-1.68351	2.64506	1.76603	2.44333	3.48153	4.32701	5.551	3.34358	2.18478	3.14198	-0.178113	2.62938	2.37303	0.109789	0.109789	0.109789	1.53819	-1.0215	1.16006	1.7017	4.21014	1.24413	2.23649	3.11539	4.54369	1.92953	-0.0505548	0.498206	2.4704	2.03759	1.01693	-0.429412	1.2689	5.33359	2.62287	2.56248	4.59186	2.69802	3.44114	1.86576	3.11493	1.69172	2.44588	1.38384	2.93676	1.72019
IGKV3-11	1.06431e-13	-12.9729	4.75283e-11	-1.46377	4.42109	5.25613	5.68266	4.74426	6.63847	5.00894	5.52596	4.86861	5.9403	2.03213	4.1668	5.26363	4.88538	4.88538	4.88538	4.92999	-0.398683	2.97344	3.86539	6.0479	4.93945	3.70542	6.71465	4.8793	3.88187	2.13794	3.00423	6.42794	4.58991	3.84425	4.24477	0.262205	4.82206	5.84516	3.42047	5.00418	4.81275	3.72436	2.49736	4.51223	3.56535	5.4141	3.7606	4.59587	3.80094
PDZK1IP1	1.25007e-13	-12.9031	5.46359e-11	1.63311	5.34994	2.40417	3.82181	5.81635	2.01921	3.35692	2.71492	3.9991	2.17885	6.68096	3.30901	3.49594	1.05191	1.05191	1.05191	7.1046	4.37804	3.53123	1.88427	5.30445	3.68419	5.90462	2.40017	2.81701	4.9991	3.89349	2.67531	2.88222	4.8517	4.11844	5.10117	5.05645	3.51688	2.70965	3.10908	4.70101	3.28266	5.22688	3.41018	1.13938	5.38465	2.3636	5.47338	2.3683	4.2221
IGKV3-20	1.47578e-13	-12.831	6.31571e-11	-1.61343	5.10487	5.62507	4.5487	4.83378	6.75531	4.66222	4.98639	4.17654	5.51509	2.48115	5.3524	5.03255	7.03108	7.03108	7.03108	3.93486	0.596521	4.22215	5.87904	6.84157	5.30479	4.38673	6.1212	4.15963	4.37961	1.9224	3.70031	7.91295	4.15753	3.893	4.79385	2.19807	6.11275	5.36253	4.47468	5.94025	5.65267	4.80436	3.07461	4.72938	3.45151	4.97732	4.48472	4.67199	5.22019
DZIP1L	1.55474e-13	-12.8083	6.51787e-11	1.67925	2.25676	0.644387	-0.259559	-1.01691	-1.03096	0.812989	1.64055	2.39479	1.671	1.95252	0.640406	1.23914	0.867678	0.867678	0.867678	1.69042	1.20783	1.49571	1.27444	1.31338	0.877535	1.22818	0.787997	1.56019	1.49873	-0.298914	1.73153	0.876229	-0.549737	1.38234	1.21508	2.05831	1.2354	-0.0500299	-0.122503	0.785978	0.38988	0.436732	0.396011	0.193785	3.04356	-0.790973	1.00519	-0.739872	1.22666
CHPF	1.71982e-13	-12.7645	7.06571e-11	-0.99485	2.79102	2.40417	3.63885	2.44644	4.76782	2.84238	3.32385	3.13367	3.61247	1.53815	3.75845	3.25876	3.23623	3.23623	3.23623	2.89319	1.63587	2.48303	2.74838	3.84782	3.21392	1.70489	4.18617	3.77575	2.24332	1.63384	2.73561	3.91203	3.34188	1.54646	2.19966	1.40702	3.02099	3.50992	2.84643	3.09695	3.00364	2.59056	2.23476	3.1555	2.04565	2.86763	2.15933	2.69455	2.33933
JCHAIN	1.85734e-13	-12.7311	7.3744e-11	-1.72143	7.16238	6.67942	8.19142	5.45809	8.97442	7.91026	8.25886	5.87944	6.82928	2.93503	7.8843	6.89239	8.2526	8.2526	8.2526	7.65472	0.317442	4.91344	6.95391	8.68696	7.96837	6.09574	9.18678	8.79251	6.29227	5.095	5.97315	8.34531	7.58409	5.03185	5.89322	4.50368	6.95211	7.74397	6.42927	7.61448	7.04041	6.48027	4.63033	7.25289	5.65385	7.32827	6.06756	6.76266	6.95914
TSPY26P	1.86675e-13	-12.7289	7.3744e-11	-0.675842	2.8376	2.95979	3.87798	3.4733	3.81621	3.22011	3.02096	2.34508	3.50275	2.83201	3.8519	3.02479	2.69514	2.69514	2.69514	3.13353	2.68529	1.75119	3.39745	2.94477	2.82868	1.5628	3.91451	3.64364	2.88669	2.30328	3.58213	3.83738	2.38434	2.57824	2.53296	2.63756	3.19247	2.68416	2.44724	2.82814	2.74723	2.57026	2.7548	3.27081	2.92772	3.1203	2.67236	4.00227	2.76104
IGHV3-48	2.26209e-13	-12.6455	8.76752e-11	-2.02672	0.28715	-2.66675	2.36688	0.400825	2.28973	-0.356347	1.27994	-1.15168	0.808353	-3.42229	1.2411	0.696878	1.30092	1.30092	1.30092	-2.24496	-2.45536	-2.58702	-1.3204	2.09562	-2.36348	-2.99075	-0.568663	0.674275	-1.33486	-1.49508	0.272611	-1.29831	1.3413	-0.22262	-1.08014	-2.55295	0.479236	-1.65887	0.416097	0.455912	-0.295269	1.43284	-1.12687	-0.546208	-0.544624	0.836871	-0.410854	1.29773	0.136651
IGHV3-23	2.55905e-13	-12.5919	9.73482e-11	-1.44442	2.61711	4.37161	4.77264	2.18937	5.86128	4.14647	3.21557	1.2686	3.03568	0.705329	3.82655	3.62587	2.3278	2.3278	2.3278	1.64144	-0.57798	1.16006	1.81399	3.95438	2.92361	1.67066	3.60706	1.1469	1.55662	0.256548	0.099877	4.58672	3.35266	1.35729	2.51363	-1.77866	3.40796	3.38891	2.67774	3.27173	3.02774	3.56426	0.254956	3.1894	1.04982	2.40533	2.39789	3.36731	2.80111
CUEDC1	3.31263e-13	-12.4798	1.2243e-10	0.629833	4.76461	4.75049	3.69621	2.96382	4.14522	4.8858	4.5221	3.69127	4.89227	4.54396	3.93967	4.3788	4.80336	4.80336	4.80336	3.96005	4.66944	4.23117	4.27812	4.63161	4.35679	4.81665	3.0424	4.07942	4.65273	4.88738	4.80347	4.57596	4.0947	4.72179	4.35205	4.46467	3.73376	4.06508	3.7593	4.21081	3.96216	4.68202	4.64689	4.19386	5.08876	4.3099	4.64961	4.02117	4.63618
IGHV3-53	3.33759e-13	-12.4766	1.2243e-10	-1.64472	-0.391409	-0.0463239	0.229211	-2.50268	0.957153	-0.0346308	0.582466	-1.46974	-1.65257	-2.46497	0.209464	0.212567	-1.07265	-1.07265	-1.07265	-0.31564	-2.85718	-1.46775	-2.46587	2.09562	-0.668387	-2.99075	-0.371633	-1.07513	-1.5624	-2.30715	-0.925651	0.0451293	-0.845838	-1.46019	-0.0385499	-2.11447	-0.181543	-0.873483	-0.183114	0.74862	-1.13715	0.0827615	-2.54016	0.0535989	-1.51973	-0.699675	-1.51224	1.16806	-1.0622
NUDT16	4.88265e-13	-12.3113	1.75964e-10	0.945029	5.64459	7.3064	4.5829	5.74635	4.58417	5.1	4.6662	5.03459	5.77551	4.93633	4.43522	4.9203	5.13611	5.13611	5.13611	5.33227	6.21859	4.51343	3.79872	4.93423	4.14458	5.01045	4.16517	4.06949	4.38362	4.60459	4.56261	5.14816	4.67112	6.39616	4.75734	5.58631	7.05434	4.3855	4.17	4.88658	5.09717	4.91109	4.58193	4.23231	5.0038	4.96516	5.25369	4.63321	4.67173
H2BC8	5.50576e-13	-12.2592	1.94572e-10	-0.844411	4.08248	3.52486	4.62946	3.72282	5.11418	4.22007	5.11396	3.78745	4.36185	2.8141	4.97937	4.99749	3.9304	3.9304	3.9304	4.0935	3.0287	5.14428	4.68733	4.9992	4.58014	3.342	5.71443	4.74639	3.43411	2.54893	4.31836	5.09826	3.76146	2.97391	3.46272	4.23819	4.84153	3.78636	4.00661	4.80476	4.3088	3.51201	3.45387	4.23231	2.30799	4.64424	3.03245	4.06555	3.96865
SLC5A9	5.58842e-13	-12.2527	1.94572e-10	1.4169	2.79668	3.61674	-1.17674	1.10189	1.81786	2.53755	0.678828	1.92205	3.82798	1.81522	0.54413	2.08943	1.8901	1.8901	1.8901	1.59074	4.03217	-0.0204538	0.742468	1.69886	2.0042	2.74417	1.7811	1.78723	1.09207	1.44447	2.61239	2.43509	-0.0558753	4.43506	0.123226	2.73258	3.64793	1.58014	0.807382	1.64833	1.85079	1.07779	2.10376	0.43891	1.39596	1.5076	2.0759	0.689864	0.420062
LAPTM4B	6.6671e-13	-12.1761	2.28259e-10	-0.873528	2.85778	2.01788	3.94261	4.34033	3.22927	2.99143	2.75968	3.33806	2.02859	1.60217	3.14637	3.74505	1.98374	1.98374	1.98374	3.46443	2.71481	2.61754	3.98616	4.39374	2.6514	3.1316	3.51044	4.61826	2.03511	2.087	2.70577	3.03151	2.90252	2.4179	2.22365	2.21697	4.27222	1.81748	2.83119	2.92342	3.52202	2.44211	2.04784	2.26763	1.35433	2.82983	2.83345	2.9526	3.02909
TTC26	7.19187e-13	-12.1432	2.42189e-10	1.349	3.77948	4.36406	1.12614	2.94013	1.19755	3.73012	1.9547	1.72239	3.49131	3.8045	0.593071	2.55426	1.94435	1.94435	1.94435	2.45678	4.46168	2.51293	2.52461	2.32113	2.43642	5.11599	2.04528	0.447663	3.43411	2.74241	3.19883	2.87345	1.25199	4.20873	1.00966	4.54167	3.62565	2.34779	2.37551	3.13364	3.41036	1.69897	2.7548	2.3697	3.86121	2.45584	1.49079	1.94603	3.43134
NT5DC2	1.05788e-12	-11.9756	3.505e-10	-0.9107	2.13238	1.34266	2.3511	2.32363	3.9121	1.81275	2.60476	2.77862	3.22724	0.0834417	2.87673	2.69478	2.53644	2.53644	2.53644	2.45678	1.75433	1.64718	2.06156	4.00997	2.357	1.80297	2.68476	3.70052	0.739012	0.656605	2.45989	2.81056	2.58663	1.63249	1.71559	1.03326	2.00693	2.07453	1.56531	1.89052	1.63766	1.93948	0.524494	1.45017	0.628845	1.80125	2.17545	1.86466	1.85952
AC010883.2	1.08256e-12	-11.9655	3.52982e-10	1.13292	1.74092	2.55777	-2.19903	-1.21548	-0.587713	0.772361	0.0692914	0.973805	1.40432	2.48115	0.49347	0.0926117	1.23716	1.23716	1.23716	0.535949	2.40044	-0.202818	0.40269	1.35691	0.273887	0.971208	-0.0435887	1.12148	1.30968	0.852335	1.36238	0.910907	1.3268	3.4591	1.62843	-1.50644	2.38842	0.389154	0.374645	0.892578	0.339424	1.82423	0.947621	0.148553	1.96497	-0.0656384	2.25347	-0.0303692	1.28434
DEPP1	1.63808e-12	-11.7857	5.25773e-10	-1.18789	1.36335	-0.0463239	1.64946	0.254803	1.74397	1.81275	1.37889	3.69623	0.279512	-1.03337	2.73128	2.49634	0.656425	0.656425	0.656425	1.14014	1.67645	0.54023	2.09158	1.49967	0.877535	1.22818	2.70673	2.47971	0.464465	-0.298914	2.65984	0.474065	2.51805	1.45498	0.123226	0.643813	2.57051	0.257078	2.55322	3.47412	3.15718	-0.745959	0.786106	1.98842	-0.196457	1.30205	0.931161	1.93012	0.566733
IGHA1	1.713e-12	-11.7662	5.4136e-10	-1.66447	8.5642	8.04663	10.8583	8.63997	11.0599	9.39047	9.08132	7.6723	10.0357	4.40432	9.93635	9.14295	8.41614	8.41614	8.41614	9.25161	3.41782	7.45339	8.22793	9.85325	7.84706	6.44113	10.0369	8.43763	7.00914	5.82142	7.47464	9.68975	9.3143	6.9628	7.34284	6.29885	8.8977	10.3547	7.87401	8.74023	8.85666	7.95255	6.38328	8.18689	7.32024	8.78071	8.0072	8.64931	8.04376
RNASE6	1.87006e-12	-11.7281	5.82042e-10	0.774067	5.68635	6.09442	4.49942	3.92345	4.72044	5.19336	4.75177	5.18344	4.02341	5.6473	4.54501	4.36592	6.25128	6.25128	6.25128	5.30698	5.68926	4.52326	5.16775	4.59346	4.73476	5.80557	4.60803	5.08391	5.3779	4.36371	4.84853	3.99518	5.62595	6.53387	5.33662	4.22425	3.27112	4.58233	4.67365	4.84071	4.95359	5.93393	4.4234	4.74085	5.76624	4.77334	6.68878	4.82826	5.6622
IGLV1-36	2.81147e-12	-11.5511	8.61988e-10	-1.77562	0.183502	-2.24098	0.697176	-1.44581	2.12487	0.450554	0.678828	-0.479428	1.13689	-2.86564	0.0781061	0.696878	0.0115755	0.0115755	0.0115755	-0.523337	-3.41607	-0.747372	-0.498981	2.71319	-0.12165	-0.597457	0.483147	0.987251	-3.22157	-4.34055	-1.63496	1.49467	0.0538967	-2.12761	-1.08014	-3.18597	0.479236	-0.168874	1.11487	1.68834	0.438631	1.97079	-0.594696	0.512163	-1.86826	0.194474	-0.510505	0.763547	-0.799986
SPATS2	2.99051e-12	-11.5243	9.03399e-10	-0.654815	2.96394	2.51748	3.83322	2.7351	4.5053	2.81264	3.49684	3.11895	3.03568	2.43502	3.55734	3.0572	3.05703	3.05703	3.05703	2.80698	2.26065	3.10358	2.93379	3.22283	2.7583	2.45337	3.56358	3.31979	2.95286	2.67501	2.88949	3.61356	3.44623	2.77075	2.86582	1.78186	2.3527	3.65256	3.24756	2.79187	2.79481	2.8398	2.42237	2.97942	2.51107	3.13277	2.41156	3.02929	3.08696
SRGAP2C	3.08445e-12	-11.5108	9.18273e-10	1.05833	4.47233	4.93007	3.76336	3.98264	3.24275	4.4532	3.18308	3.25302	3.55866	4.83118	3.26438	3.23771	4.26745	4.26745	4.26745	3.45737	4.95981	4.07959	3.6042	3.15664	3.44271	3.36359	2.91608	3.46829	4.40741	2.99816	3.31206	3.32943	3.45959	4.70203	3.07807	4.5228	4.89839	3.38891	2.93465	3.36725	3.66717	3.37832	3.65442	3.69715	4.7843	3.00289	3.82844	3.53975	4.11093
HSP90B1	3.17946e-12	-11.4976	9.33035e-10	-0.875674	7.1692	7.45559	8.1953	7.01812	9.25364	7.14791	7.27025	7.03002	7.38688	6.45332	7.64346	7.91576	7.73221	7.73221	7.73221	7.54872	6.14279	7.366	7.00705	7.53364	6.63583	6.60077	8.25294	7.26603	6.4147	6.1586	6.53087	8.23117	7.47874	5.91859	6.53342	6.30217	7.12156	7.62815	6.96308	7.46881	7.40637	6.83045	6.19176	7.16371	7.1577	7.76806	6.92167	7.3316	6.5343
IGLV6-57	3.26536e-12	-11.4861	9.44746e-10	-1.95359	3.45874	2.60981	5.27542	1.30105	5.76884	3.69251	3.57822	1.29502	3.51411	-1.31931	4.03574	3.6789	4.19658	4.19658	4.19658	1.61631	-3.41607	0.883182	3.09065	4.22489	3.74784	1.31938	7.72467	4.75467	2.78139	0.912091	3.94976	4.27688	3.37751	1.56845	2.47417	-0.751289	2.98644	2.75116	2.40669	4.04351	3.56108	1.56179	0.679738	4.33177	1.60563	2.63313	1.10957	3.0218	2.7912
IGLV5-45	3.5072e-12	-11.455	1.00062e-09	-1.53984	0.822366	0.540972	1.56985	0.711926	3.62879	2.27212	-0.734573	-0.479428	1.49879	-0.411012	1.61738	0.47495	-0.780988	-0.780988	-0.780988	-0.0512577	-3.41607	-0.488516	0.624229	1.76498	0.583988	-0.597457	2.20816	0.1787	0.199655	-2.30715	0.498206	0.563967	-0.216577	-0.382196	-0.587399	-4.34055	1.41933	1.1042	1.08947	-0.173303	-0.0739705	0.926339	-0.686571	1.18489	-0.802644	1.73734	-0.733186	-0.303805	0.470627
MZB1	4.19807e-12	-11.377	1.18132e-09	-1.48708	4.33182	4.09868	5.43932	4.02267	6.74588	4.89292	5.62906	3.47145	5.65245	0.625433	5.47496	5.23735	4.51381	4.51381	4.51381	4.55013	-0.398683	3.01582	4.21816	5.77057	4.82852	2.25971	6.14687	5.89693	3.23578	1.40342	3.59032	5.8223	4.74935	2.29138	3.204	1.94948	4.27699	5.28693	3.93712	4.68132	4.12368	3.56426	1.81641	4.66056	2.32963	5.02327	2.96912	4.57811	3.82057
C1orf162	4.33643e-12	-11.3629	1.1899e-09	0.628349	7.607	8.21041	7.21965	7.11389	6.81911	6.9869	6.87372	7.6013	8.13644	7.55449	6.61782	6.40091	7.73173	7.73173	7.73173	6.94347	7.85328	7.13957	6.91089	6.73013	6.54245	8.35552	6.51952	7.04396	7.12487	7.30882	7.33851	7.08298	7.22299	7.28222	6.48027	6.87312	7.5564	6.60522	6.56962	7.15084	6.7828	6.88487	6.64535	6.52931	7.81837	6.89736	7.25987	6.62489	7.36501
BUB1	4.34438e-12	-11.3621	1.1899e-09	-0.931382	3.31112	2.12904	3.90526	3.22141	5.19612	2.71953	4.09142	3.55033	3.74367	2.63187	3.86192	3.97872	3.67367	3.67367	3.67367	3.5729	1.61514	5.21115	3.61458	4.39113	3.23628	2.08876	3.88591	3.44287	2.78139	2.18715	3.07595	4.44307	3.95783	1.94982	2.67892	2.74566	3.69862	3.73349	3.18897	3.53023	3.37948	2.90608	3.48578	3.27607	1.77296	3.51752	2.38408	3.28837	3.27653
IGLV1-47	4.45736e-12	-11.3509	1.20478e-09	-1.66295	3.5613	3.1387	4.27098	2.92813	7.42267	3.39087	3.27843	1.77964	3.30775	0.451003	4.45521	2.72536	2.77215	2.77215	2.77215	2.57887	-1.30774	1.32644	2.67096	5.03313	4.37706	1.83424	4.85427	4.06616	2.37785	0.509613	2.54659	4.62639	3.57763	2.35603	2.97585	-0.366533	4.76884	5.06296	4.12383	3.65663	3.42857	2.80549	1.19936	4.35187	1.77296	3.44934	2.51655	3.60634	3.18106
XBP1	4.54057e-12	-11.3429	1.21133e-09	-0.749409	6.71556	6.6923	7.77591	6.26087	8.26752	6.66219	6.94811	6.04523	7.07045	5.89526	7.18444	7.01502	7.22263	7.22263	7.22263	6.42752	5.524	6.49245	6.93489	7.30865	6.79622	6.73418	7.9559	7.48888	6.57384	6.11794	6.10471	7.60512	7.02322	5.59079	6.32538	5.92492	6.38338	7.33894	6.47104	6.99605	6.68832	6.38035	5.9765	6.82493	6.50526	6.80782	6.06756	6.51317	6.60815
AC103996.2	4.71325e-12	-11.3267	1.24128e-09	1.55738	2.82503	3.41215	0.0839423	0.920042	1.42735	2.05218	-0.134015	0.323755	3.64383	0.852958	-0.314619	2.59897	0.555473	0.555473	0.555473	1.5647	3.9518	-1.18576	0.742468	1.4603	0.330423	2.62409	0.612913	0.406176	-1.13835	2.43133	3.04053	2.5714	-0.549737	3.4173	1.28515	1.50256	2.3527	0.790534	0.868386	2.06782	1.41212	1.66109	1.43559	-0.157403	-0.325824	1.61819	3.16755	-0.230436	-1.21366
IGKV1-5	5.01067e-12	-11.3001	1.29946e-09	-1.65676	5.24532	4.96045	4.86447	4.03949	7.59739	4.69791	6.43896	3.52265	5.21806	1.42472	5.60294	7.88985	6.55243	6.55243	6.55243	3.93486	-0.239227	3.41464	4.92678	5.90034	5.26183	3.42649	6.73884	5.68886	4.29712	2.51078	5.50374	5.19991	4.71773	2.79893	3.96421	2.7842	5.05108	4.60061	4.24955	4.92267	5.25521	4.9351	2.91185	5.97474	3.64951	5.53886	4.5008	5.08154	4.59118
LINC02207	5.06068e-12	-11.2958	1.29946e-09	1.53424	5.67405	6.57612	2.89919	3.65893	4.3047	4.62847	2.91283	2.50074	6.07291	3.68149	2.67556	5.44449	4.1013	4.1013	4.1013	4.78248	6.91899	2.1693	3.24553	4.36738	2.73754	5.66917	3.76198	3.47833	1.90746	5.18253	5.78089	5.27504	2.36317	6.42282	4.11931	4.14749	5.88317	3.37835	4.01338	4.15479	4.16047	4.98194	5.02185	2.66297	2.59389	4.27093	5.69647	2.53538	1.46978
PSAT1	5.92302e-12	-11.2275	1.50211e-09	-0.833668	2.10728	1.07292	3.54482	1.82552	3.47171	1.70894	2.46761	2.75978	2.15002	1.3016	2.40108	2.78463	2.6054	2.6054	2.6054	1.78365	0.999737	4.13512	2.66099	2.63579	2.28731	-0.167713	2.94718	2.41843	2.20763	0.509613	2.04916	3.30357	2.73684	0.48072	1.037	2.11987	2.05218	2.80734	2.4572	2.02159	1.83266	1.36377	2.13093	2.84411	1.70834	2.14703	1.04083	1.79608	1.98658
H2BC9	6.03153e-12	-11.2196	1.51097e-09	-0.723325	3.99406	3.46961	4.73663	3.13012	5.06002	4.38747	4.84125	3.42436	4.03922	3.32473	4.69266	4.55368	4.25409	4.25409	4.25409	3.96005	3.46491	5.38424	4.14847	5.01117	4.46806	3.342	4.57258	5.02517	3.43411	3.49478	3.73764	4.70259	4.09898	2.94057	3.47277	3.36994	4.02229	4.11998	4.00322	4.30711	4.45223	3.83907	4.18823	4.29851	2.96967	3.97092	3.12668	4.08723	3.99047
IGHV4-61	6.40653e-12	-11.1934	1.58558e-09	-1.50845	0.866753	1.64656	-2.62912	0.175847	2.97853	0.812989	1.74811	-1.30196	0.38223	-1.89452	2.19459	1.56633	0.780899	0.780899	0.780899	-1.42446	-1.88374	-0.411615	0.704122	2.93762	0.914989	-0.29724	1.95026	0.406176	0.688124	-1.21387	-0.0963874	1.1031	0.579558	0.051699	-0.587399	-3.18597	0.777501	3.68291	1.34692	-0.103323	1.41212	0.0827615	-0.594696	1.54049	-0.196457	1.25718	0.770621	0.867463	0.313282
GIMAP8	6.69936e-12	-11.174	1.63831e-09	0.741765	6.64478	7.73725	6.64359	6.71111	5.47975	6.68083	5.9398	6.86568	5.97769	7.29403	5.40474	5.13479	6.80466	6.80466	6.80466	5.72353	6.88639	7.01104	5.56946	4.87558	4.6004	6.16654	4.81941	4.94414	6.50752	5.65652	5.61826	5.54441	6.69007	5.60682	6.32676	6.31867	5.99892	6.24229	5.87352	5.67247	6.13362	6.23241	5.83499	6.03734	7.80612	6.08851	6.248	6.19976	6.52461
H2BC5	7.39474e-12	-11.1311	1.78709e-09	-0.58419	5.61982	5.50312	6.18047	5.6197	6.34558	6.55699	5.99933	5.17635	6.08056	4.92177	6.233	6.64567	5.40632	5.40632	5.40632	5.55854	5.94938	6.10124	6.17904	6.14188	6.20057	5.53527	6.60145	5.97438	5.62281	5.00525	5.71503	6.54365	5.375	4.81673	5.00062	5.13558	6.82995	5.4267	5.49016	6.40012	6.67567	5.15034	5.52647	5.92531	4.36686	6.10601	4.68664	6.07054	5.60958
AC009119.1	8.72983e-12	-11.059	2.08521e-09	0.846997	2.4189	2.87728	1.30068	1.01383	1.27829	1.92821	0.798049	1.32097	1.49879	2.61128	1.81598	1.75597	2.61379	2.61379	2.61379	1.4556	2.47134	1.0556	1.04823	1.98899	2.60632	3.02725	1.55756	1.37905	2.60058	2.03419	2.24855	2.04019	1.03712	2.94898	1.53566	1.994	2.42329	1.92295	1.16436	1.47617	2.87671	1.49876	2.389	1.31341	3.19274	0.742353	2.32748	1.84781	1.98658
H2BC7	8.92228e-12	-11.0495	2.10668e-09	-0.729422	5.09413	4.81009	5.63944	4.64882	6.21665	5.48653	5.74396	4.34089	5.32186	3.86228	5.47333	6.09917	5.1735	5.1735	5.1735	5.12074	5.05329	6.01595	5.93702	5.67385	5.85161	4.71953	6.32846	5.47227	5.08766	3.90089	5.42583	6.19014	4.70095	4.62017	4.379	4.97272	6.22322	5.03969	5.05775	5.74777	5.48292	4.94695	5.24651	5.20164	3.74118	5.38702	4.21128	5.18907	4.8542
E2F1	9.1532e-12	-11.0384	2.13665e-09	-0.952357	3.09712	1.64656	3.58587	5.23527	3.19502	3.18184	2.74491	4.91193	3.03568	1.53815	2.96304	4.78414	2.31756	2.31756	2.31756	3.90405	1.84612	4.0322	3.58323	4.11193	2.62903	2.39166	2.87787	4.32181	1.43843	1.36117	2.77923	3.07037	3.68105	4.01012	2.11241	3.08103	3.24213	2.32598	2.70308	3.04397	3.66717	2.4082	2.69234	2.45577	1.15054	2.34227	2.96912	4.03983	3.39907
IGHG4	1.04114e-11	-10.9825	2.40306e-09	-1.8882	3.75074	0.831326	4.49584	4.95104	4.80235	1.9096	2.41262	3.55033	3.24098	0.252544	6.94093	1.05883	3.29482	3.29482	3.29482	3.76806	-0.0288923	2.72363	1.75893	3.37348	1.69534	2.03595	3.0424	3.28015	3.04674	-1.21387	1.20067	3.6448	0.982633	2.03125	4.26514	-0.751289	3.38161	2.10045	1.73869	0.203224	2.81342	2.25133	1.47853	2.09955	0.793644	2.12222	1.46479	5.3261	0.821732
CDC25A	1.07916e-11	-10.9669	2.46074e-09	-0.946798	0.994723	0.177069	1.42654	0.920042	2.78026	-0.18654	2.08936	1.95556	1.86085	-0.688887	1.61738	1.79493	1.17045	1.17045	1.17045	1.10445	0.463719	3.07046	1.72103	2.26512	1.05578	-0.97702	1.71037	1.5023	0.580624	-0.599106	2.07273	2.31076	1.26726	0.773596	0.0712903	0.400929	1.19562	1.15457	1.23555	0.857912	1.20227	0.245196	1.32231	0.280205	-0.544624	1.46877	0.00458762	0.571763	0.699859
AL357033.3	1.09885e-11	-10.9591	2.46074e-09	0.786393	2.73266	2.9797	1.7966	3.05489	2.06544	2.10222	2.27552	1.46754	3.03568	2.48115	2.14621	2.02535	2.15454	2.15454	2.15454	2.29201	2.52787	1.66505	1.72103	2.02991	2.10487	3.06727	2.02211	1.78723	2.15238	2.45161	1.95085	2.71568	1.49194	2.66245	1.23881	2.85832	3.58004	1.96589	2.04648	2.81916	1.57362	1.43284	2.25959	2.11138	1.89411	2.98236	2.12654	1.96177	1.46978
MANF	1.10208e-11	-10.9578	2.46074e-09	-0.667232	3.63217	3.30575	4.03938	3.39703	5.0077	3.24259	4.17915	3.26643	3.71444	2.92672	3.96313	4.12348	4.17405	4.17405	4.17405	4.08894	2.40044	3.91019	3.86539	4.45511	4.2399	3.42649	4.62159	4.23562	3.29649	2.89828	2.94161	4.3323	4.06004	3.0065	3.26306	3.23734	3.31819	3.98384	3.46559	3.84098	3.72727	3.17158	3.3127	3.53525	3.4064	3.64926	3.48466	3.25683	3.32543
MYBL2	1.17182e-11	-10.9311	2.58833e-09	-0.950741	4.03593	3.41215	4.72443	3.88673	5.91803	3.93267	5.06279	4.09243	3.83705	2.44669	4.65282	4.82471	4.36762	4.36762	4.36762	4.7453	1.82822	4.9594	4.73803	5.31965	4.78619	2.94371	4.62159	5.08061	2.69381	2.36872	4.03019	5.14634	4.85675	3.16645	3.61559	2.79682	4.36928	4.30417	3.52837	4.2942	4.01937	3.62455	4.01313	3.47698	2.7465	4.1837	3.05876	4.14352	4.15797
IGKV4-1	1.20613e-11	-10.9186	2.63579e-09	-1.54126	5.14862	5.47007	6.57983	5.45182	7.89705	5.25364	5.74211	5.5676	4.81173	2.16523	5.53569	6.78703	5.19463	5.19463	5.19463	4.55013	-1.15753	3.27622	5.12303	7.16643	6.52211	4.55099	6.85775	6.31844	4.20962	1.97938	3.17725	5.90848	5.57545	4.80288	4.23595	2.8822	4.96497	5.04971	4.41969	5.24789	5.07228	4.31821	2.14432	5.40644	2.73843	5.65042	4.68945	5.29692	4.96417
AC010210.1	1.28381e-11	-10.8915	2.77601e-09	0.905003	5.79703	7.15483	3.91603	5.90623	4.70592	5.31681	4.61231	3.82872	5.68798	5.20723	3.89645	5.29284	5.29721	5.29721	5.29721	4.92488	6.55757	5.12343	4.44146	4.57514	4.88859	6.26877	4.97686	3.22156	4.56379	5.50224	5.03403	5.76777	4.6939	6.74413	3.90239	6.18104	6.92424	4.46499	4.63248	5.64478	5.63708	4.71936	5.21195	4.37414	5.30084	4.75933	4.92462	5.02461	5.0684
IGKV3D-15	1.34434e-11	-10.8715	2.87661e-09	-1.68185	0.0632471	-0.217125	3.43677	0.766836	1.40355	-0.655663	0.479204	-1.01559	1.13689	-1.16926	0.386479	-0.5218	2.70303	2.70303	2.70303	-3.27613	-3.41607	-0.949977	-1.89553	0.252387	-0.668387	-1.21229	1.42247	0.128561	-0.0366934	-2.30715	-3.0891	3.22306	-1.98753	-2.44248	-1.48419	-2.55295	-0.407942	-0.108229	0.331966	-0.406253	-1.28763	-0.55552	-3.47051	0.101857	-0.196457	-1.22794	-0.617553	-0.549365	0.0726183
PER1	1.44072e-11	-10.8414	3.05105e-09	1.25857	5.90431	8.10982	4.65218	4.73741	4.40099	4.71677	4.44427	5.66957	5.73726	6.1022	3.99989	5.23026	4.7396	4.7396	4.7396	5.10953	6.60235	4.45816	4.03719	4.73832	3.63454	4.47368	3.69028	4.17515	3.90434	3.84832	4.12341	4.32909	5.41241	7.51272	4.79984	4.89562	6.83401	4.73288	4.4069	4.3638	4.87828	4.09489	4.35304	4.28812	4.58501	5.02494	4.67535	4.34897	4.26928
ZBTB16	1.51686e-11	-10.8191	3.17952e-09	1.46814	6.64393	8.56757	5.40341	4.15206	4.62075	6.08866	5.57374	5.95595	6.64013	5.90798	4.86197	5.46879	5.62138	5.62138	5.62138	4.33597	7.62517	4.57141	4.30719	4.45009	4.5115	4.95464	4.21456	4.83894	3.92646	4.18145	5.10431	5.03285	5.00079	8.53609	5.38927	5.48467	8.10059	4.64753	5.03299	5.29401	5.71212	4.23685	5.30434	4.91471	4.96111	5.15446	5.01699	4.54193	5.40379
IGLV2-5	1.60679e-11	-10.794	3.33401e-09	-1.45568	-0.407334	-0.217125	-1.37255	-0.191909	1.58378	-1.54763	0.582466	-1.87836	-0.769094	-2.86564	-0.227056	0.426153	-0.330951	-0.330951	-0.330951	-0.415754	-0.8972	-1.06306	0.495426	0.617037	0.330423	-0.597457	1.10717	-0.501047	-1.33486	-2.99184	-2.4292	1.27267	0.188364	-1.8693	-1.8343	-4.34055	-0.181543	2.39044	0.0972919	-2.46126	-0.761811	-0.6476	-4.34055	-0.622566	-2.08021	-0.247676	-0.858901	-1.21848	-0.478878
TUBG1	1.63829e-11	-10.7856	3.36537e-09	-0.530314	2.25169	1.56982	2.39795	1.82552	3.24275	2.06906	2.95834	2.82469	2.17885	1.83311	2.54484	2.86005	2.43588	2.43588	2.43588	2.57887	1.26217	3.41464	2.12099	2.81033	2.19897	1.63559	2.73551	2.88654	1.86226	1.22643	2.56332	3.01566	2.61676	1.86351	2.3046	1.78186	2.27848	2.34779	2.37551	1.70794	1.86869	2.3137	2.18378	2.23554	2.31885	2.30968	1.85346	2.34448	2.16606
IGHV3-49	1.78876e-11	-10.7474	3.60854e-09	-1.54336	0.149956	-1.41995	1.01029	-1.01691	0.668531	0.287128	1.03495	-1.01559	-0.0815063	-1.89452	0.54413	0.612158	2.07166	2.07166	2.07166	0.172097	-2.14142	-2.28312	-0.109324	1.55678	0.0225843	-1.49355	0.643609	-0.424194	-0.427586	-4.34055	0.099877	0.840698	0.188364	-0.881184	-1.08014	-3.18597	0.479236	0.430623	0.495591	0.309666	0.38988	1.80699	-1.97918	0.680507	-1.86826	-0.247676	-2.3222	1.02558	-0.216391
DNMBP	1.79895e-11	-10.745	3.60854e-09	0.524041	4.32673	4.4978	4.08782	3.92345	3.87797	4.00897	3.74331	3.80134	3.78175	4.40132	3.69261	3.57641	3.65752	3.65752	3.65752	4.56334	4.46458	3.03655	3.3298	3.3029	3.77356	4.37083	3.66432	3.90424	3.89876	4.21743	4.12341	3.52119	3.87051	4.85077	4.80383	3.60337	3.87267	4.32081	4.0986	3.50245	3.66717	4.82806	3.64031	3.59126	4.57825	3.75793	4.74452	3.75826	3.84473
IGHV3-7	1.80937e-11	-10.7425	3.60854e-09	-1.54442	0.475463	1.10953	1.51422	0.00365547	2.30266	3.72481	1.65641	0.0411728	-0.564143	-2.15173	1.07876	1.47332	-0.0401579	-0.0401579	-0.0401579	0.781763	-1.88374	-2.03223	-0.795968	1.17433	0.75896	-0.597457	2.05673	2.46968	-1.13835	-2.99184	-1.63496	1.0102	0.311359	-0.469132	-0.28703	-3.18597	-0.290306	-0.684533	-0.312556	-0.0365812	1.02206	0.138963	-2.54016	1.33376	-1.00448	0.494266	-0.317643	0.571763	0.0726183
AP003119.1	1.89389e-11	-10.7226	3.74079e-09	-1.03626	1.2542	1.48876	-0.259559	0.400825	1.19755	2.52538	0.934429	0.800231	2.31492	1.49384	1.56927	2.80386	1.78996	1.78996	1.78996	0.688401	2.33857	-0.338606	1.22112	1.35691	2.13693	1.92416	2.85837	0.406176	1.27562	1.63384	1.24283	2.49346	0.603827	0.847407	-1.64865	0.989952	1.2354	2.36927	2.75247	3.33611	3.09771	-1.72843	1.6759	1.8819	-1.86826	2.65059	-0.317643	1.4167	0.897613
IGLC3	1.95255e-11	-10.7094	3.81993e-09	-1.64489	4.98822	4.85659	5.63455	5.2737	6.18384	6.67671	5.67749	4.68352	-4.34055	1.9194	2.88658	6.05672	5.52343	5.52343	5.52343	4.01396	1.20783	4.6065	6.0426	7.14642	6.6274	4.83609	7.4165	2.84056	5.38391	-0.0505548	3.77403	6.54709	3.73424	3.39901	4.62399	-0.258136	4.5178	8.27914	3.39996	6.06137	3.76121	4.75576	-0.0159224	5.87933	3.5562	5.73978	4.24223	5.31235	5.91248
SLC39A8	2.29131e-11	-10.6399	4.44038e-09	-0.769955	3.99533	3.61674	3.51679	4.59294	4.32384	3.60845	4.1117	5.56489	4.56112	3.17842	3.88176	4.32658	3.78562	3.78562	3.78562	3.74506	2.68529	4.29279	4.97186	4.728	4.34996	5.3503	3.61483	4.02221	3.73292	3.92284	3.39852	4.37017	4.09042	3.47665	3.30864	4.21957	3.84722	3.93425	3.55644	3.62089	3.5775	3.08839	3.78842	3.96515	2.85495	4.06504	3.07604	3.84143	3.62794
IGKV1-16	2.47003e-11	-10.6073	4.742e-09	-1.38959	2.59302	2.94973	4.05408	1.77284	3.85182	4.42071	3.19399	0.762862	2.97123	-0.0414162	3.27941	2.73541	1.87621	1.87621	1.87621	1.14014	-4.34055	1.87913	1.90132	4.20419	2.68431	1.5628	4.04096	4.22671	2.71938	-1.84472	2.87616	3.60829	1.70885	0.810973	2.40243	-0.906307	4.41762	2.11324	2.04648	2.98093	3.24888	2.63031	-0.349697	2.96645	2.1096	2.70172	1.20691	2.87991	4.08276
TMIGD3	2.53065e-11	-10.5968	4.81338e-09	1.4424	1.90403	3.70311	-0.359931	-1.72004	0.668531	1.57361	0.798049	1.55758	3.18524	0.583763	0.270914	0.0926117	0.555473	0.555473	0.555473	1.10445	2.16408	-3.5001	0.449803	0.68692	0.487841	1.8948	1.33113	-0.582224	-1.13835	-0.0505548	1.15725	1.04184	-0.98369	2.23749	-0.673393	1.59217	2.63141	0.11168	0.677046	0.630364	1.52929	-0.166887	1.09286	-1.08009	0.0319427	1.00914	0.0750347	-0.0303692	-0.138532
UCHL1	2.76831e-11	-10.5578	5.21711e-09	-1.15461	-0.156625	-2.24098	1.01029	0.00365547	1.54079	-1.03378	1.19559	1.44412	0.478119	-3.42229	1.35898	0.776898	0.329533	0.329533	0.329533	0.0270995	-0.0288923	0.419144	0.449803	0.652402	1.32983	-0.29724	2.22856	0.742538	-2.16556	-2.99184	0.918036	0.606901	-0.497168	-0.0121473	-1.08014	-1.50644	0.479236	-0.517488	-0.122503	0.670869	-0.217669	-1.08908	-1.41043	-0.546208	-1.23922	0.194474	-0.14755	-0.462784	-2.05729
CCNE1	3.48955e-11	-10.4572	6.51657e-09	-0.840687	0.507986	0.10638	1.5423	0.00365547	2.59305	-0.548841	0.934429	1.49058	0.880319	-0.79483	0.815594	0.852711	0.810409	0.810409	0.810409	-0.523337	0.154643	2.41076	0.816233	1.4603	1.12133	-0.29724	0.944114	1.56019	-0.218941	-0.776423	1.20067	1.35053	0.784549	0.282099	0.0174153	-0.751289	0.479236	0.691663	0.416097	0.257426	0.531452	0.0827615	1.19936	0.280205	-0.135879	-0.00972878	0.267824	0.727176	0.00561075
IGHV1-2	4.11541e-11	-10.3856	7.57196e-09	-1.67861	2.5282	-0.31076	4.30005	1.87634	4.73243	2.57347	4.29517	2.05166	2.48614	1.19493	5.43525	3.60957	1.83373	1.83373	1.83373	4.45767	-1.30774	-0.488516	3.02994	3.19911	0.9871	-1.21229	3.4466	3.05707	0.338127	-4.34055	-0.452239	3.76814	3.34188	-0.469132	-1.20266	-2.11447	3.0877	0.389154	0.955311	3.00489	-0.144031	2.94601	-0.0767838	2.56309	0.182261	3.38822	-0.317643	3.28837	-0.216391
H2AC11	4.12842e-11	-10.3842	7.57196e-09	-0.719528	4.32423	2.99934	4.75775	3.91739	5.3173	4.43379	5.47543	4.36914	4.53905	3.68149	5.29993	5.20698	4.15979	4.15979	4.15979	4.66793	3.29289	5.41491	4.7522	5.51121	4.6787	2.80856	5.08426	5.27608	3.51664	2.67501	4.08915	5.1805	4.3776	3.63614	3.82217	3.33576	4.91379	4.3855	3.86412	4.92685	4.43431	4.33635	4.15553	4.01955	2.73032	4.27375	3.15947	4.75337	4.04988
IGKV6-21	4.35436e-11	-10.3611	7.91569e-09	-1.41954	0.103131	2.38936	0.969512	-0.418203	0.35776	1.03531	1.25931	-0.479428	0.049131	-2.15173	1.04398	0.815302	0.288181	0.288181	0.288181	-1.22963	-4.34055	-0.0204538	-0.498981	2.49679	0.583988	-0.774792	2.1452	0.987251	0.523713	-1.84472	-2.4292	0.27548	-0.39745	-1.29225	-1.08014	-4.34055	-0.290306	0.657141	-0.887194	0.501542	0.485788	-0.166887	-0.594696	0.711941	-1.86826	-0.456046	-1.99905	-0.0303692	0.51948
H2BC11	4.57954e-11	-10.3392	8.25201e-09	-0.617837	4.11588	3.53835	5.05438	3.98842	5.10499	3.98694	4.58356	3.35699	3.99937	3.30563	4.37702	4.76954	4.1191	4.1191	4.1191	4.43988	3.73361	5.18508	4.78242	5.21118	4.57137	3.18108	4.60609	5.00099	3.59469	2.4716	3.96243	4.80293	4.11806	3.42937	3.39568	3.74034	4.54576	4.40644	3.76733	4.4064	3.92414	3.83907	3.93049	3.66539	3.06952	4.05852	3.26871	4.16407	4.12283
IGHV4-59	4.62688e-11	-10.3347	8.26481e-09	-1.56867	2.9455	3.2819	4.7815	3.34384	4.1946	3.9825	2.75968	0.836657	2.55373	0.252544	3.5818	5.8698	2.24377	2.24377	2.24377	2.30779	-1.30774	1.99665	1.07852	3.72862	1.95111	0.258256	3.86652	2.47971	1.95128	-0.978629	1.76084	4.10408	3.11162	0.951492	3.15494	0.527476	4.24325	2.26996	2.32199	2.61633	2.47077	2.87332	0.440122	3.17819	0.82446	2.71837	2.22277	2.17931	2.99495
AF127936.1	4.79786e-11	-10.319	8.49635e-09	1.37446	1.3847	0.177069	0.00542681	-0.686718	0.35776	1.25765	0.367978	1.66277	0.279512	2.00081	-0.407843	-1.83402	0.656425	0.656425	0.656425	-1.91688	0.463719	0.0355479	0.251351	0.157115	0.536715	-0.167713	0.516699	0.406176	2.32886	-2.30715	1.87246	-0.772943	0.0538967	0.051699	-1.08014	2.03719	0.606032	1.12961	-0.122503	-1.4824	0.852516	-0.6476	0.042475	1.54049	2.29705	0.194474	-0.317643	-1.21848	0.566733
ITM2C	5.41114e-11	-10.2667	9.50048e-09	-1.15849	4.55711	3.97022	5.06409	3.92948	6.8331	4.27926	5.43691	3.39413	5.39124	3.13581	5.32549	4.93346	4.89229	4.89229	4.89229	4.6339	2.06058	3.70533	4.30399	5.78956	4.72688	2.85503	6.16152	6.17451	3.34658	2.67501	3.9561	5.63794	4.60652	3.04622	4.00976	2.73258	4.14746	4.90458	4.12696	4.6838	3.93693	4.22392	3.12953	4.64436	3.47112	4.69349	3.81821	4.6672	4.05817
LONRF3	5.46103e-11	-10.2627	9.50682e-09	-0.592357	3.87919	3.90403	4.38778	3.63699	4.22547	4.06891	3.63537	3.63032	4.48814	3.40469	4.36651	3.65263	3.35614	3.35614	3.35614	3.7039	3.88844	3.23496	4.7309	3.95792	3.2728	5.04427	5.25675	3.25116	2.95286	4.57717	5.02197	4.88153	3.29793	3.98989	3.39568	5.04856	4.98553	3.72101	3.18897	4.84514	3.97874	4.02578	2.86408	3.78844	2.8624	4.3317	3.87361	4.62582	3.53001
IGKC	5.52308e-11	-10.2578	9.53404e-09	-1.44919	8.89565	9.08621	10.2838	8.51045	11.2495	9.18708	9.87547	7.93999	9.84891	5.76616	9.52186	9.75872	9.80645	9.80645	9.80645	8.4278	3.47644	7.52239	8.69303	10.2287	8.92829	7.2882	10.4654	10.2389	8.11381	5.71849	7.89096	10.6376	8.40567	7.19611	7.95344	5.39413	9.19459	8.7757	8.08046	9.17509	8.85848	8.08764	6.31237	9.14887	7.2676	9.06621	8.00636	9.08822	8.27295
CAV1	6.21474e-11	-10.2066	1.06386e-08	-1.10651	0.479617	-1.64537	0.4229	0.766836	2.65483	-0.268947	1.21715	1.46754	1.30321	-1.89452	-0.227056	0.567857	1.05191	1.05191	1.05191	0.481329	0.0960209	-0.655828	1.32586	1.62957	1.30182	-0.167713	1.06243	1.73792	-0.319495	-0.169397	1.28379	1.7649	0.424688	0.48072	-0.76484	-0.611322	-0.290306	0.510147	0.0454021	1.05441	0.485788	0.295516	-0.349697	0.101857	-0.802644	0.569606	0.637286	-0.303805	-0.216391
NFIX	6.33572e-11	-10.1982	1.07561e-08	1.17327	7.36594	5.98046	6.20044	6.98159	4.21867	6.08244	4.98168	6.93714	4.88354	8.65126	5.12585	7.43635	6.09744	6.09744	6.09744	9.20061	6.02792	6.42395	6.92294	6.81451	6.67525	6.46505	5.16583	6.23944	7.18116	5.92477	6.10471	5.38087	7.05932	7.05671	7.83215	6.64523	5.52229	5.32041	5.0196	6.18538	5.42965	7.12381	6.0379	4.07801	7.21479	5.31633	7.80053	6.16619	7.33249
IGKV1-6	7.70494e-11	-10.1132	1.29733e-08	-1.73447	2.31441	2.63514	6.6075	0.175847	1.62553	1.77212	2.92598	-0.233036	1.96381	-0.411012	2.5695	1.94102	0.156497	0.156497	0.156497	0.588577	-3.41607	0.615653	3.13457	2.98	1.83866	0.854068	3.19008	3.39064	1.69192	-0.169397	5.3215	4.50396	1.89736	0.695804	0.894834	-2.11447	0.930739	1.22697	1.06362	3.40976	1.92109	2.26402	-0.206797	2.45577	0.402484	2.53316	0.931161	3.1441	1.67777
IGHV1-69D	8.42851e-11	-10.0742	1.40763e-08	-1.73565	1.29786	0.244456	1.7731	0.920042	4.64379	1.06925	1.03495	-1.46974	2.36595	-0.590195	-0.314619	2.19515	-0.149546	-0.149546	-0.149546	1.03029	-2.85718	-1.46775	0.303581	3.65642	1.18404	-1.21229	1.6662	3.53717	1.05238	-0.599106	1.01853	4.80984	1.84742	0.171493	-2.04742	-1.77866	1.75658	2.03474	1.08947	0.892578	1.08466	2.0462	-1.97918	-1.75398	-0.325824	3.02982	1.10957	2.59714	0.420062
H2BC6	8.85241e-11	-10.0529	1.46417e-08	-0.600407	4.48176	4.28625	5.01734	4.04506	5.25881	5.61272	5.00044	4.24251	4.82091	3.53065	5.15058	5.3047	4.37258	4.37258	4.37258	4.32437	4.42047	5.61081	4.85859	5.23324	4.95976	4.231	5.34811	5.04389	4.39952	3.73708	4.59551	5.49954	4.55455	3.92318	3.77425	3.93559	5.47323	4.62984	4.22351	5.03748	5.37903	4.00325	4.76215	4.70225	2.8624	5.02494	3.53551	4.77803	4.68785
SDC1	8.90962e-11	-10.0501	1.46417e-08	-1.41392	1.30623	0.308835	1.51422	0.920042	3.92887	1.10241	1.74811	2.30665	2.65977	-1.6763	1.64085	2.02535	1.49515	1.49515	1.49515	1.20899	0.210975	-1.81858	1.55858	2.79459	0.877535	-0.439553	3.37979	2.74395	-0.965438	-1.49508	2.36764	2.95048	0.886988	0.917625	-0.76484	-0.906307	2.25931	1.42463	0.743685	1.89052	0.989706	-0.310035	-0.426831	1.37362	-0.900036	0.569606	-0.510505	1.02558	0.741638
GIMAP6	9.17992e-11	-10.0372	1.49662e-08	0.578251	7.18501	7.72918	7.2943	6.49741	6.28906	7.17933	6.75117	7.03982	6.3749	7.35606	6.44029	5.73606	7.37698	7.37698	7.37698	6.09606	6.93214	7.63543	7.04158	6.16884	6.58228	6.7112	6.40661	6.75166	7.62215	6.60013	6.06266	5.99587	7.26259	5.90461	6.75793	7.62333	6.91125	7.19333	6.82755	6.27021	6.75721	6.72653	7.075	7.09756	8.2151	6.51386	6.71866	6.5987	7.24214
SLC39A14	9.56055e-11	-10.0195	1.54184e-08	-0.538842	2.06183	0.996797	2.59849	1.82552	3.09455	2.27212	2.75968	2.82469	2.41523	2.37521	2.24139	2.56557	2.25454	2.25454	2.25454	2.01275	1.98182	3.01582	2.68087	2.58179	2.22902	1.36291	2.77764	2.20519	2.07527	1.40342	2.09591	2.43509	2.6521	1.52413	1.68136	1.85609	1.78366	2.7264	2.61683	2.17027	2.11353	1.26621	2.11741	2.16915	1.80421	2.37415	1.23794	2.35644	2.2408
KCNN3	9.60741e-11	-10.0174	1.54184e-08	-1.02152	1.18496	-0.31076	2.09085	0.711926	3.15282	1.13482	1.34012	2.65148	2.26202	-0.590195	2.12972	2.18051	0.623553	0.623553	0.623553	1.17498	0.463719	-0.655828	1.32586	2.49679	1.3573	0.586704	2.01038	1.98335	0.788166	-0.298914	2.40525	2.16035	0.5042	0.773596	-0.28703	-0.906307	1.64286	1.22697	1.18848	1.60718	1.17375	0.605793	-0.0159224	0.941431	-0.135879	1.08813	0.770621	1.24725	-0.138532
POU5F2	1.00703e-10	-9.99696	1.6036e-08	0.546579	5.44838	4.95039	4.86169	5.66015	5.16991	4.98913	3.73959	4.023	5.46038	4.8707	4.41154	4.89587	4.34259	4.34259	4.34259	5.38901	5.13926	5.30528	5.17302	4.66013	5.441	5.8387	4.91844	4.81139	5.07286	5.93019	5.62226	5.46204	4.86682	4.94835	4.55003	5.42901	5.61002	5.19817	5.08532	5.16347	5.22947	4.68438	4.83003	4.79873	4.68285	5.68789	4.39806	5.27189	5.32353
IRF4	1.01855e-10	-9.99202	1.60947e-08	-0.840503	5.44201	5.06433	6.56193	5.12925	7.48069	5.49592	5.88867	4.99284	6.00612	4.72017	6.28513	5.93229	5.8954	5.8954	5.8954	5.53359	3.28635	5.76681	5.39839	6.01006	5.52364	4.02287	6.49868	5.84256	5.44266	4.11943	4.65527	6.29067	5.98243	3.87105	5.34894	4.17192	5.41379	6.02345	5.46939	5.42559	5.10663	5.57509	5.04524	5.66619	5.10611	5.74893	5.33669	5.86621	5.06634
LMAN1	1.06014e-10	-9.97464	1.65932e-08	-0.643121	5.09678	4.63596	5.88808	4.84658	6.78094	5.09794	5.39733	5.26589	4.89227	4.85765	5.62517	5.16298	5.53342	5.53342	5.53342	5.06844	3.8446	5.79851	5.21112	5.46348	5.3787	4.44359	5.83237	5.51924	5.05791	4.63151	4.08915	5.75231	5.7247	3.77028	4.98316	4.51518	4.62277	5.66361	5.09811	5.07569	4.9515	5.01611	5.07002	5.2277	5.2535	5.37263	4.79757	5.30157	5.03518
GLDC	1.06811e-10	-9.97138	1.65932e-08	-1.13404	1.63522	1.37309	2.41324	0.329661	3.94956	0.597337	2.38431	3.08907	2.73933	-1.48679	2.40108	2.26618	1.19303	1.19303	1.19303	1.87123	1.52913	0.75561	1.62166	2.8259	1.69534	1.07955	2.47888	2.88654	-0.965438	0.256548	3.04053	2.89093	2.02865	1.63249	1.09016	1.2689	1.91194	2.10045	1.50895	1.08471	1.86869	1.49876	0.350508	1.11607	0.133874	0.953973	1.04083	1.24725	0.860171
COL9A2	1.07434e-10	-9.96886	1.65932e-08	1.30695	3.87665	4.63596	0.884321	1.33778	2.18194	3.59686	3.06323	3.03523	5.14325	2.15103	2.24139	2.34705	2.73416	2.73416	2.73416	1.4556	4.29252	1.45522	1.84956	2.41678	2.05542	3.28656	2.05673	1.66943	1.63931	2.087	3.4976	2.43509	2.00151	6.48195	2.61687	2.34279	4.93508	2.32598	1.73869	1.6279	2.62617	2.47523	2.29605	2.23554	2.25242	2.26505	4.77922	1.83078	1.80145
RIN2	1.24554e-10	-9.90464	1.90939e-08	1.02619	5.87457	5.77503	5.79341	3.61471	3.96996	6.20485	4.73131	5.22697	4.52789	6.63133	4.31638	3.7047	5.65226	5.65226	5.65226	4.38886	6.46867	5.41887	4.99389	3.87052	4.63728	5.74311	3.42908	4.37385	6.80262	4.09386	4.45015	4.74405	5.61554	4.46468	4.61722	5.48467	3.02099	5.49793	4.1207	4.49084	5.0819	5.01611	4.52674	5.29151	7.22529	4.75328	5.1059	4.77134	5.62641
BAG1	1.32947e-10	-9.87632	2.02296e-08	0.710578	5.60515	4.98528	4.7815	4.74768	4.37063	5.11429	4.59389	4.45072	4.83456	5.94239	4.45521	5.08261	5.10668	5.10668	5.10668	6.25306	4.83542	5.24718	4.98791	5.97295	4.97757	5.42921	4.35102	4.34944	5.43689	4.92775	4.97585	4.63937	5.11812	5.54021	6.5406	5.54389	4.85755	4.42194	4.43237	4.67387	4.4611	5.72146	4.81754	4.38393	6.10586	4.49279	6.08899	4.61092	5.50884
PRKCE	1.53141e-10	-9.81491	2.31311e-08	0.76546	6.24683	6.29944	5.8771	5.32262	5.037	6.69721	5.4219	5.72527	6.99344	6.27743	5.29068	5.13668	5.87896	5.87896	5.87896	4.32049	6.56232	5.77609	5.73313	4.5566	6.01898	5.78171	5.57308	5.13559	6.41177	4.83045	5.9383	5.46787	5.57238	6.4423	5.04674	6.54406	7.18895	5.91165	5.49621	5.29238	5.88258	4.69613	5.69864	5.84961	6.25823	5.66874	5.36332	5.66219	6.10584
SUV39H2	1.59971e-10	-9.79596	2.39863e-08	-0.584359	1.12801	0.244456	1.36499	0.870759	2.28973	1.03531	1.71819	2.09741	0.56803	0.852958	1.46795	1.47332	1.65007	1.65007	1.65007	1.06784	0.367867	2.68037	1.46995	1.8282	1.18404	-0.167713	1.36836	1.73792	1.24073	0.509613	1.67106	1.4482	1.67488	0.695804	0.981802	0.80242	1.06925	1.31818	1.32532	0.630364	1.48356	0.565349	1.45722	1.11607	0.557266	1.08813	0.727531	0.612214	1.1039
MIXL1	1.78519e-10	-9.74832	2.65735e-08	-1.3655	0.0560408	-0.761282	1.5423	-0.191909	2.32817	-1.1856	0.709569	1.12872	-0.0815063	-4.34055	0.77375	0.323309	0.656425	0.656425	0.656425	0.481329	-0.0956537	-1.63253	0.251351	1.4603	0.215045	-2.3058	1.90029	1.46238	-0.965438	-1.84472	0.099877	0.977857	-0.497168	-0.766624	-1.64865	-3.18597	0.665482	0.657141	-0.991737	0.309666	-0.144031	-1.54015	-1.57629	-0.338747	-1.68349	0.194474	-1.73521	0.350518	-0.684824
DHCR24	1.84214e-10	-9.73468	2.72239e-08	-0.56095	3.57818	4.27017	4.68089	4.20273	3.6441	3.86182	3.31887	4.49981	4.66664	3.48044	4.38399	4.11965	3.78933	3.78933	3.78933	2.95463	3.83567	4.4785	3.75718	4.30486	3.44911	2.95797	3.66806	3.75525	3.50198	2.65766	3.40781	4.32909	4.29803	2.81741	2.37055	3.43597	3.3089	3.47566	3.27598	2.8895	3.8359	3.56938	3.44307	3.26021	3.29529	3.93931	3.32761	3.6843	3.4938
GGH	2.41589e-10	-9.61692	3.54481e-08	-0.790928	0.845795	-0.410897	0.158404	0.254803	1.64595	0.687501	1.34012	1.57924	1.78788	-0.178113	1.2411	2.23819	0.839328	0.839328	0.839328	1.10445	0.553598	1.30382	0.582559	2.04329	1.41072	0.34764	1.62064	1.24429	-1.13835	0.161263	1.20067	1.56167	0.763159	0.48072	0.221803	0.945305	0.606032	0.790534	0.955311	1.14346	0.660365	0.645135	0.604204	0.615507	-0.625609	1.13849	0.326758	0.443126	0.0726183
ALMS1P1	2.44499e-10	-9.61172	3.56206e-08	1.83828	3.73359	4.29422	1.39609	5.24739	1.3297	4.52833	3.24734	2.96293	1.82482	2.17929	0.440966	0.522151	2.19984	2.19984	2.19984	-0.415754	2.23371	4.09943	0.449803	0.107011	2.08858	1.48614	0.340546	0.227155	4.24085	-0.599106	1.15725	0.221248	3.76685	0.570636	-1.8343	4.34087	5.86109	0.97001	1.06362	1.08471	4.17133	-0.310035	3.96487	1.50504	2.92772	0.60585	-0.858901	1.97734	1.87837
BHLHA15	2.54303e-10	-9.59465	3.6788e-08	-1.39567	1.24194	0.874507	1.99251	0.654842	3.47742	1.31535	2.45859	0.90686	2.3908	-2.15173	2.44173	1.97534	1.53104	1.53104	1.53104	1.17498	-1.88374	-0.0787175	1.32586	2.90134	1.67366	-0.29724	2.8649	2.85605	-0.544436	-1.84472	1.43691	2.61412	1.1067	-0.382196	0.400796	-0.366533	1.70084	1.73712	0.607178	1.70794	0.852516	0.957927	-1.41043	0.914664	-1.11708	1.13849	0.437861	1.62872	0.0726183
FCGR2B	2.66111e-10	-9.57494	3.8227e-08	0.972444	5.34897	5.01935	3.86135	4.86872	3.98608	5.6256	4.4328	3.16265	4.00743	5.93205	3.5818	4.6418	4.62801	4.62801	4.62801	4.96773	3.90987	3.731	4.03333	3.11288	5.64145	5.56819	5.16979	3.39064	5.64466	4.1067	4.73497	4.91608	3.13262	4.21222	3.39039	6.40467	6.42053	4.79969	4.78266	5.77008	5.32818	3.15123	5.74992	4.29592	5.28431	3.40375	3.90296	4.10506	4.66089
H4C8	2.785e-10	-9.55518	3.94722e-08	-0.539185	5.46623	5.35282	5.40341	5.18576	6.01644	6.20198	5.98055	5.38289	5.81736	4.97311	6.21943	6.08352	5.46664	5.46664	5.46664	5.36281	5.81839	5.91879	5.51235	5.79154	5.70697	5.44702	6.42936	5.86475	5.49726	4.47686	5.68858	6.24128	4.79486	4.64108	4.6879	6.05538	6.85969	5.18004	5.57724	6.11097	6.49658	5.22688	5.18628	5.6742	4.42079	5.70887	4.98761	5.7119	5.25306
UTS2	2.80854e-10	-9.55152	3.94722e-08	-1.77216	0.435792	-0.217125	-1.59917	-3.14683	-2.86392	-2.03209	1.73323	0.160925	-1.00806	-2.86564	2.25666	0.269	-0.968736	-0.968736	-0.968736	2.90361	-1.30774	-0.949977	-0.330297	-1.84828	-1.19784	-0.439553	-0.881807	-0.962155	-0.671591	-0.978629	2.65984	-0.887454	-0.781556	-1.46019	-1.08014	2.73258	-3.14064	-1.49461	-0.122503	-1.4824	-1.13715	-0.55552	-1.97918	-0.473688	0.663345	-2.62034	3.14316	3.33746	-0.925145
BTG3	2.81759e-10	-9.55012	3.94722e-08	-0.508514	1.65096	1.43208	2.5017	0.595407	2.23684	1.87164	1.79186	2.43098	0.732608	1.40092	1.64085	1.54363	2.35809	2.35809	2.35809	1.06784	0.509359	2.88475	1.95129	1.81265	2.21408	0.854068	2.04528	2.0656	2.20763	1.48438	2.07273	1.32504	2.41895	0.735224	0.981802	1.56291	1.02454	2.02123	1.87871	1.28065	1.88637	1.24075	2.04784	2.20273	1.97874	1.23421	1.29809	1.54761	2.2408
IGLV3-9	2.82466e-10	-9.54903	3.94722e-08	-1.42328	0.991139	-0.410897	-0.359931	1.22465	0.586355	0.102796	3.53167	0.217269	0.652664	-0.497823	1.00834	0.993341	0.720004	0.720004	0.720004	-0.222025	-1.47541	-0.949977	0.40269	1.8282	2.98653	-1.84325	1.03953	0.0766166	0.835701	-0.0505548	0.272611	0.27548	0.805627	-1.00563	0.268676	-1.08001	-0.676605	4.82518	0.642535	-0.173303	1.02206	0.757105	0.0986003	1.06829	0.0319427	3.61854	0.20638	0.301885	1.25579
B3GALNT1	2.92395e-10	-9.53403	4.05836e-08	-0.627992	0.964582	1.03536	0.296705	-0.546222	1.56244	0.772361	1.77742	2.26716	1.671	1.13848	1.27148	1.92355	1.02699	1.02699	1.02699	0.91137	1.36505	1.23373	1.10819	1.84358	0.9871	2.03595	1.65117	0.674275	0.270551	0.58498	1.84535	1.56167	1.12359	0.917625	0.173356	1.50256	0.606032	0.883061	1.84875	1.98992	1.11497	0.861008	0.642465	1.11607	-0.900036	1.78554	0.541017	0.251556	0.821732
AC139495.2	3.00189e-10	-9.5226	4.13858e-08	0.916001	7.98756	8.47437	6.45982	8.51297	6.37494	6.20675	6.5413	5.30216	8.07403	6.37608	7.05504	7.83307	6.18946	6.18946	6.18946	7.01971	8.23771	7.13518	7.27654	6.64983	6.59243	7.29874	7.08548	5.36539	7.08117	8.81788	8.53322	8.14777	6.40641	8.54824	4.60357	7.61401	8.61134	7.67015	6.4556	8.45418	7.87892	6.70109	7.9908	6.51546	6.952	7.84944	6.12576	7.6118	7.24577
SMIM25	3.26023e-10	-9.48675	4.46477e-08	0.761735	8.71651	9.03092	8.03901	9.80485	8.55226	7.2923	6.69659	7.12788	8.88811	8.04279	8.45651	8.76172	7.43793	7.43793	7.43793	9.18894	9.20416	7.31952	7.65004	8.62725	7.57131	9.66528	7.471	6.96847	7.85047	8.70549	8.47803	8.52587	6.99769	9.11212	7.85561	8.25851	9.53498	7.51131	7.29082	8.60926	8.24996	8.00853	7.90757	6.56794	7.53837	8.33076	8.17497	8.22739	7.78276
PHGDH	3.31383e-10	-9.47967	4.50812e-08	-0.717124	1.61183	0.244456	2.20064	1.01383	3.07961	1.22791	2.46761	2.86051	2.46289	0.451003	1.99053	2.436	0.92276	0.92276	0.92276	1.42698	1.79175	2.77388	2.06156	2.72984	2.0042	0.162967	2.52906	2.26443	0.881719	0.96947	2.61239	2.17469	1.67488	2.03125	1.35197	1.9267	2.05218	1.48493	1.38916	2.11262	1.75779	2.21257	1.17347	2.12312	0.48195	1.94965	0.589954	1.93012	1.22666
ACOT7	3.45228e-10	-9.46189	4.65722e-08	-0.562986	2.52953	0.957175	3.75138	3.49785	2.68476	2.27212	2.44951	3.38185	2.05992	1.58114	2.80584	3.25178	2.42639	2.42639	2.42639	2.91396	1.93242	3.71394	2.95027	3.38404	2.8674	1.92416	2.56158	3.56099	1.9727	1.97938	2.92876	2.91675	2.62864	2.03125	2.00577	2.47431	3.34571	2.51133	2.80802	2.56353	2.68797	2.44211	2.99553	2.58022	2.03251	1.8168	2.02342	2.75902	2.73024
SLC44A1	3.46877e-10	-9.45982	4.65722e-08	-0.365736	5.64949	5.73459	5.63455	5.84055	6.07881	5.69925	5.43	5.36274	6.10518	5.57736	5.55434	5.97214	5.94197	5.94197	5.94197	5.62304	5.92011	5.55562	5.94424	5.88834	5.50534	5.71818	5.8282	5.58579	5.17572	5.24486	5.3215	6.28573	5.71915	5.38156	5.48542	5.83906	6.31309	5.39824	5.28451	5.99811	5.53008	5.60907	5.21036	5.40404	5.52258	5.91159	5.82596	5.64402	5.32181
HEMGN	3.51511e-10	-9.45406	4.68879e-08	1.17545	6.20453	4.15668	4.98957	5.01198	3.60811	5.54649	4.48926	5.00089	2.34066	6.77422	3.21833	6.04263	4.31969	4.31969	4.31969	7.21333	5.72355	4.28126	6.15969	6.55724	5.36861	5.26683	4.17571	5.79514	6.1805	5.25643	4.81749	4.90537	6.28877	5.92819	7.23596	4.53791	4.0166	4.61417	3.43567	3.80503	5.08382	6.60896	5.2558	3.43049	6.84992	4.25675	6.48476	3.99081	6.04039
WLS	3.83566e-10	-9.41616	5.08336e-08	-0.810702	6.03721	7.4323	7.38722	5.85805	7.11813	5.4755	4.53504	3.35699	6.25651	5.87813	6.76189	7.15167	6.32406	6.32406	6.32406	7.97657	7.00216	3.56492	6.55598	5.34148	5.59172	5.85785	7.0672	5.65162	3.76396	6.88651	5.44852	6.57168	4.96611	6.53806	7.49443	5.89148	7.52464	6.1783	6.38689	5.78515	6.15018	6.04013	5.86564	5.62757	3.83497	6.36187	6.02926	7.33764	5.96854
TSHR	3.96505e-10	-9.40175	5.22116e-08	-0.9494	0.568274	-0.518506	-0.259559	-1.01691	2.31547	0.166893	1.21715	1.74172	1.13689	-2.46497	1.1459	0.815302	0.408844	0.408844	0.408844	0.424559	-0.57798	0.721873	0.779822	1.61171	0.437253	0.0609361	2.11266	1.89613	-0.427586	-1.21387	1.76084	1.47162	0.0887066	0.655276	0.521825	-0.157316	0.665482	0.997866	0.242623	0.408792	0.852516	-1.72843	1.14709	0.00367044	-0.467944	1.00914	0.142201	0.443126	0.00561075
RIPK3	4.03573e-10	-9.39408	5.28038e-08	0.437097	5.09472	5.28842	4.79615	5.15521	4.5682	5.37902	4.51777	3.70611	5.77551	4.70568	4.46511	5.17964	4.71835	4.71835	4.71835	4.51658	5.0339	4.55234	4.54543	4.56126	4.92805	5.48198	4.39679	4.13127	4.95135	5.23026	4.65136	4.94774	4.76557	5.22422	4.12569	5.42901	5.68016	4.77977	4.60137	5.03554	4.7918	4.38364	4.89684	4.55185	4.51825	4.75126	4.17966	4.80008	4.71432
AC012368.1	4.06367e-10	-9.39108	5.28328e-08	0.874634	6.11283	6.77438	5.18257	5.64557	4.55206	6.26374	4.88061	3.92491	6.47272	5.90904	4.87687	5.29963	5.15636	5.15636	5.15636	5.07306	7.31406	4.73467	4.63224	4.70081	4.81372	6.10057	4.88189	4.47513	5.3879	5.1916	4.91523	5.04266	4.22167	7.17566	5.78351	6.18344	6.2058	5.06625	5.0479	5.12936	5.72323	5.66037	5.80999	4.25383	5.56882	5.04157	5.93652	5.17057	6.04143
RN7SL3	4.34599e-10	-9.36191	5.61479e-08	1.41223	3.43093	1.37309	0.593635	0.766836	1.97144	1.68724	2.75231	1.49058	2.48614	1.66346	2.55722	3.09671	2.00941	2.00941	2.00941	2.61737	1.48413	2.9877	3.21858	3.41525	3.15252	2.58786	2.22856	1.99739	1.7674	1.95117	1.24283	2.5822	3.27166	1.4784	3.31423	2.47431	1.67214	2.33692	1.13983	1.87327	2.18671	3.14438	2.33161	1.0438	1.87951	2.08419	2.28353	2.768	2.39275
TWSG1	4.48992e-10	-9.34776	5.7645e-08	-0.511987	3.32561	2.84508	3.42927	4.25648	3.41332	3.18958	3.45663	3.36948	2.88639	3.03117	3.17076	3.39812	3.26848	3.26848	3.26848	3.5859	2.83618	2.89235	3.54577	4.2482	3.41683	2.87019	3.58746	4.07612	2.62784	3.10444	3.36073	3.85084	3.43274	2.6104	3.19795	3.12172	4.78569	2.97087	3.2816	3.72073	3.24888	3.33687	2.57854	3.13825	3.1076	3.0431	3.44531	3.91604	3.33228
H4C4	4.52848e-10	-9.34405	5.76752e-08	-0.670376	5.39544	5.06433	5.3003	4.73741	6.02621	5.4928	5.51839	4.36914	5.23874	4.53031	5.71773	6.25835	5.47011	5.47011	5.47011	4.87278	5.55697	6.43375	5.7367	5.9527	5.90727	5.38238	5.89988	5.6791	5.17341	5.27362	5.41895	6.52977	5.35905	5.11078	4.75528	5.78624	6.26825	5.55529	5.2448	6.3827	5.94929	5.33909	5.86361	5.35635	3.97888	6.09888	4.80536	5.52326	5.5811
SEPTIN11	4.54843e-10	-9.34214	5.76752e-08	-0.452505	4.62762	3.74443	5.48705	4.85927	4.97578	4.91875	4.2304	4.85536	2.92093	4.55478	4.71495	4.68651	4.8609	4.8609	4.8609	4.72193	4.25282	5.26632	4.88882	4.78687	4.74259	4.29981	4.60803	5.09211	4.48399	4.5445	4.3035	4.7198	5.50633	4.21919	4.97259	4.24281	4.78569	4.63428	4.80623	4.73006	5.13279	4.94301	4.43979	4.26446	4.63367	4.55668	4.86125	4.78689	4.91252
GIMAP2	4.82609e-10	-9.3164	6.08206e-08	0.686604	6.05737	6.58427	5.22433	6.43414	5.42021	5.8312	5.69199	5.5194	4.53348	6.00293	4.86197	4.60116	6.21382	6.21382	6.21382	5.1385	5.7967	5.86764	5.36191	4.71133	5.32406	5.6735	5.08705	4.84671	6.28051	5.34039	5.127	5.13172	5.83389	4.65142	5.0963	7.095	7.03334	5.47705	5.3608	5.59959	5.84578	5.04948	6.13586	5.71258	6.40179	5.35278	5.13916	5.55733	5.62641
ZBTB32	4.93267e-10	-9.30692	6.17847e-08	-0.917431	1.75291	0.996797	2.57149	1.71816	3.39534	1.70894	2.42193	2.28044	2.65977	-1.16926	2.96304	2.12043	1.74482	1.74482	1.74482	1.42698	0.154643	3.05699	1.84956	2.7048	2.21408	0.0609361	3.15322	2.8249	0.881719	0.161263	1.67106	2.21688	2.22918	0.526378	1.43651	1.75624	1.88718	2.59578	1.21221	2.02159	1.69898	1.75399	2.15759	1.57509	0.48195	1.21087	1.96896	1.94603	0.782241
KIAA0319L	5.23087e-10	-9.28143	6.49556e-08	0.797021	8.18037	8.64968	7.39591	7.4652	7.27186	8.96354	7.08922	6.46727	7.60767	8.4556	6.67007	7.48704	7.73293	7.73293	7.73293	7.0113	9.05525	7.46523	7.27163	6.6656	6.9343	8.07832	7.55994	6.42224	7.86915	7.27579	7.85701	7.82959	7.27492	7.75463	7.15016	8.49009	8.72027	7.26958	7.06106	7.91561	8.51636	7.30437	7.9176	7.28591	8.39042	7.46588	7.19808	7.54187	7.49131
CNTRL	5.24906e-10	-9.27992	6.49556e-08	0.460217	6.57687	7.53217	6.22447	6.801	6.4253	6.77574	5.97027	6.10431	6.00209	6.59114	5.69269	5.82463	6.33552	6.33552	6.33552	5.75696	6.33247	6.98727	5.69209	5.47216	5.74516	5.5981	5.69807	5.40542	6.57297	6.28546	5.96373	6.23017	6.53897	6.0514	6.24635	7.10391	7.41145	6.2328	6.414	5.99312	6.26868	6.22917	6.48943	6.30934	6.6813	6.3632	5.66827	6.49368	6.49819
CD1D	5.48921e-10	-9.26049	6.75206e-08	0.474362	4.34761	5.16559	3.61921	3.2506	3.31469	4.3841	4.05896	4.44188	4.14526	4.59729	3.64698	3.39178	4.4543	4.4543	4.4543	4.05194	5.03195	3.70533	4.08647	3.78945	3.30842	4.19532	3.22602	3.67018	3.86479	3.9937	3.82349	4.37328	4.49579	4.38946	4.54051	4.40821	3.95836	3.68291	3.23603	4.1113	3.60446	4.42379	3.08854	3.73206	4.7506	3.65791	4.65249	4.33393	4.2221
SRM	5.68611e-10	-9.24518	6.95263e-08	-0.609373	4.23118	4.29422	5.25859	4.13651	5.61024	4.11837	4.85678	4.41804	4.23034	3.87961	4.80339	4.75726	4.49576	4.49576	4.49576	4.22398	3.09006	5.099	4.79388	5.18122	4.55959	2.85503	5.1711	5.5241	3.87051	3.1671	3.69272	4.83489	4.56695	3.11508	3.90239	3.19982	3.81477	4.47741	4.12383	4.28444	4.05888	4.12998	4.18823	4.3011	4.27503	4.40553	4.17566	4.4219	4.39896
GINS1	6.15075e-10	-9.21107	7.47625e-08	-0.786321	1.33187	0.693441	1.26742	0.819733	2.62427	0.228262	2.05386	2.45461	0.948865	0.198349	2.00868	1.1518	1.78996	1.78996	1.78996	1.17498	0.830266	3.41464	1.7017	1.87386	1.56004	-0.439553	2.1665	2.13073	0.881719	-0.169397	1.47278	2.25786	1.97384	0.984583	1.06382	0.945305	1.27411	1.68667	1.23555	1.30659	1.31101	1.0191	1.29854	1.18489	0.729965	1.36685	0.589954	1.29773	1.54249
ACOT9	6.67636e-10	-9.17546	8.02474e-08	0.702117	6.35395	6.84393	6.06666	5.9047	5.49953	6.60115	4.87554	4.48555	5.32831	6.48479	5.75181	5.05077	6.20134	6.20134	6.20134	5.3853	6.66293	5.98072	5.71034	5.19927	5.4394	7.02751	5.47834	4.61371	6.43992	5.84653	5.89434	5.68253	5.25083	5.54992	5.28909	6.97589	6.3867	5.91805	5.21428	6.12288	6.64808	5.31643	5.9376	5.69892	6.72073	5.88603	4.85626	5.75882	6.27186
IGLC2	6.71533e-10	-9.17293	8.02474e-08	-1.38367	6.60608	7.02011	8.19585	6.20604	9.02221	6.46198	7.16153	4.94359	8.96278	3.88819	8.35131	7.27046	6.30345	6.30345	6.30345	7.56932	0.638204	5.33906	6.14813	7.34794	7.03075	4.94393	8.21655	7.97108	5.82182	4.1067	6.79891	7.37649	6.46099	5.08049	5.56738	3.28291	6.61872	6.32571	6.75973	5.84612	6.56885	6.40849	4.18175	6.78068	5.348	6.81316	5.79368	7.34065	5.97512
AC073342.2	6.71918e-10	-9.17268	8.02474e-08	1.15362	4.31599	4.46991	2.58506	3.77062	2.78026	1.10241	1.64055	0.0411728	3.78175	2.88444	3.24919	3.57081	2.07166	2.07166	2.07166	5.01416	4.30874	1.28083	3.20491	3.3195	3.2728	6.28017	3.33818	0.958837	2.44068	4.64917	3.96243	3.87299	0.251172	4.87303	2.17526	4.32788	3.94643	2.13849	2.03322	4.24139	3.05144	3.06682	3.46991	0.742705	1.92287	4.41066	3.04128	3.25683	2.02092
IGHV3-21	6.8065e-10	-9.16708	8.08204e-08	-1.57834	1.47353	1.10953	2.6118	0.967696	3.53332	1.83265	1.39789	0.940721	1.35465	-1.03337	1.91555	1.21061	-0.267914	-0.267914	-0.267914	0.688401	-4.34055	-0.655828	0.251351	2.4372	0.153701	0.34764	2.52906	0.775495	0.402678	-2.30715	-0.750014	3.05495	1.20517	-1.00563	0.358086	-1.50644	1.15472	2.91353	1.3034	2.02159	1.97166	1.0191	-0.686571	1.27183	-0.196457	2.791	1.63768	1.93012	1.13558
IGHA2	6.97016e-10	-9.15676	8.22879e-08	-1.47842	4.81655	3.95521	7.83066	4.34935	4.10521	6.16126	4.9024	3.6355	4.94356	0.921469	5.66863	4.0286	2.75707	2.75707	2.75707	6.06273	-0.0288923	2.46275	3.45054	5.43837	3.58892	4.26007	4.49264	5.05735	3.58081	1.52322	2.02521	5.19464	4.01097	2.86262	4.10969	2.09964	4.94711	4.47988	4.83899	3.61571	4.87607	2.72515	1.61947	2.90657	3.43663	4.6	4.18763	4.32787	3.46914
TMEM268	7.24537e-10	-9.13994	8.50482e-08	0.90112	5.99877	6.7514	5.62145	5.19329	5.09015	6.27196	5.34322	5.16207	4.58823	6.36767	4.70941	3.89602	5.92942	5.92942	5.92942	4.28903	5.80129	6.3326	4.9658	3.91488	5.13266	4.6942	4.71307	4.78736	6.43607	4.18145	4.55426	4.69266	5.79093	4.49083	5.03492	6.59282	6.05279	5.47209	5.2084	4.3883	5.93024	4.91311	5.89069	5.45718	7.09826	4.78326	4.80277	5.46785	6.17798
PDIA4	7.38149e-10	-9.13186	8.61537e-08	-0.620726	5.81608	5.84319	6.80586	5.49311	7.61044	6.0969	6.03694	5.82949	6.10518	5.35853	6.32007	6.19968	6.19925	6.19925	6.19925	5.84612	5.20488	6.17634	5.83757	6.15504	5.441	5.20239	6.45392	6.0546	5.41554	4.86109	5.3817	6.51927	6.33662	4.66933	5.53299	5.14301	5.58329	6.19795	5.71232	5.92463	5.79403	5.44041	5.14022	5.72033	5.9917	6.15117	5.56649	5.9296	5.66763
ADCY7	7.90221e-10	-9.10225	9.17103e-08	0.359249	8.17667	8.38411	8.26462	7.93898	7.92605	8.54742	7.46609	7.41248	8.13184	8.3991	7.75183	8.00802	7.9937	7.9937	7.9937	7.67387	8.28009	7.95468	7.80556	7.52144	7.59855	8.12923	7.39241	7.78813	7.93201	7.98993	7.82615	7.92784	8.30888	7.86008	7.91436	8.30674	8.27593	7.88932	7.85976	8.04668	8.49941	7.77799	7.84512	7.44811	8.53992	8.1787	7.70137	8.21574	8.17153
ALOX15B	8.00953e-10	-9.09639	9.24335e-08	1.71528	3.05874	5.29638	-2.62912	-0.191909	1.70556	2.50072	1.59188	3.70118	3.95006	2.28708	0.209464	0.522151	1.97073	1.97073	1.97073	-0.523337	3.66469	-1.06306	0.251351	1.29112	-0.783666	0.791728	0.841935	-0.582224	-0.811046	-0.298914	1.81773	2.04019	0.0887066	5.13861	0.123226	0.751464	3.70571	0.82204	-0.122503	1.45313	1.41212	0.0827615	-0.889987	0.615507	0.229077	1.03595	2.73897	-0.641476	-0.478878
AC008957.3	8.08327e-10	-9.09241	9.27634e-08	1.56447	1.65043	3.20786	-0.359931	2.10665	-1.67404	-1.1856	-1.00705	1.03778	0.38223	-0.497823	-1.73251	0.212567	-0.0938156	-0.0938156	-0.0938156	-0.904656	1.1223	-0.845121	0.0211789	-0.30299	-1.36734	4.1649	-0.716755	-2.29334	-1.13835	1.27275	0.865037	0.327747	-0.174693	0.655276	-3.50848	-0.483742	0.340214	-1.09096	-1.10445	1.08471	-0.00715495	-1.54015	-0.889987	-0.87937	-1.51973	1.23421	-0.858901	-1.72288	-0.478878
H2BC17	8.15404e-10	-9.08863	9.30558e-08	-0.787582	3.8568	2.81214	4.72136	3.16119	4.96363	3.94643	4.83603	3.23266	3.95839	2.70172	4.5104	4.55652	4.02154	4.02154	4.02154	3.643	2.74374	5.61771	4.48169	4.78687	4.30129	2.41253	4.43677	5.097	2.86395	2.43133	3.99362	4.59207	3.95547	2.57824	2.80352	3.30074	4.18349	3.78636	3.59756	4.44194	3.81297	3.35478	3.88733	3.80311	2.15879	3.70879	2.47807	3.33746	3.84473
IGKV2-29	8.25635e-10	-9.08321	9.37027e-08	-2.00269	0.231321	-1.22503	2.6118	-2.50268	-0.587713	-1.1856	-0.0804398	-2.85295	-2.12973	-1.89452	1.5446	2.77492	-0.968736	-0.968736	-0.968736	2.51232	-4.34055	-1.63253	-0.690032	0.107011	2.07209	-2.99075	0.182287	2.69311	-0.671591	-4.34055	-2.4292	-0.772943	-1.72321	-1.6503	2.04669	-2.55295	1.61297	-1.84426	-0.789717	-2.86238	-1.865	-2.50989	-2.23257	-1.59168	-1.68349	-1.22794	-4.34055	2.45981	-0.385974
SLC1A4	8.59728e-10	-9.06564	9.70359e-08	-0.599418	3.57617	2.94973	4.42596	3.44832	5.09944	3.65389	3.77998	3.60415	3.53656	3.48044	3.87187	3.88252	4.1191	4.1191	4.1191	3.7907	2.68529	3.86454	3.29797	4.16493	3.62891	2.41253	3.97309	4.23265	3.53115	2.88343	3.4444	4.21231	4.0818	2.42997	3.59734	2.90569	3.42526	3.5528	3.53779	3.41573	3.52767	3.44114	3.06055	3.09122	4.39279	3.48383	3.32037	3.28212	3.78604
CPM	9.09107e-10	-9.04138	1.02049e-07	0.907146	3.32104	5.11472	1.42654	1.33778	1.25187	2.31519	1.60828	3.49443	2.17885	3.6465	2.21036	1.67474	3.06929	3.06929	3.06929	2.59182	4.05927	2.40013	1.86702	2.20684	0.951495	3.18108	1.06243	1.81919	1.58471	2.97032	2.80759	2.11645	2.15721	4.55006	3.47277	2.05831	2.37067	1.48493	1.3682	1.47617	2.70799	3.8433	2.10376	1.39314	3.74118	1.36685	4.68382	2.06738	2.81095
B4GALT2	9.3255e-10	-9.03033	1.04111e-07	-0.630694	1.4032	0.0320472	2.07171	1.10189	2.65483	0.597337	1.87557	2.17058	2.12061	0.540853	2.21036	2.16572	1.36198	1.36198	1.36198	1.36799	1.36505	2.27776	1.53693	2.52568	1.85802	0.511333	2.38208	2.26443	0.402678	1.07781	1.87246	2.14587	1.29734	1.56845	0.981802	0.80242	1.38438	1.48493	0.71075	1.6279	1.59528	1.04874	1.45722	1.29277	0.762156	1.38782	0.931161	1.05522	1.56594
TLK1	9.42775e-10	-9.02559	1.04315e-07	-0.415529	6.97546	6.73392	7.36381	7.2369	7.56356	6.90997	6.50944	6.27992	7.34298	6.70241	7.4116	7.56165	6.73951	6.73951	6.73951	7.51385	6.61219	6.81197	7.38808	7.02772	6.94169	7.00451	7.61882	6.64647	6.59989	7.15887	7.15613	7.74142	6.72955	6.21021	6.70353	7.08217	7.69123	6.95879	6.86685	7.9214	7.57973	6.76331	6.43597	6.84589	6.27715	8.04134	6.68456	7.59897	6.65057
AL031985.1	9.44531e-10	-9.02478	1.04315e-07	1.01354	3.18195	3.79025	2.12838	4.16745	2.06544	2.42411	2.08936	2.54544	3.30775	2.6821	1.30124	0.269	2.83093	2.83093	2.83093	2.33884	3.04429	1.87913	0.779822	-0.0546725	0.9871	3.10621	0.893929	-0.0332443	2.5009	1.80121	2.28935	3.10073	2.26005	3.76552	1.35197	1.2689	5.24136	1.12961	1.03729	0.785978	2.26989	1.97079	1.8495	1.45017	3.26753	2.46574	2.41156	2.44868	1.03836
AL357033.4	9.56514e-10	-9.01931	1.05073e-07	0.69883	4.47783	4.84307	4.18007	4.93914	3.76109	3.98694	4.09142	3.75451	5.09112	4.1099	4.07503	4.11581	3.94378	3.94378	3.94378	3.87786	4.31518	3.56016	3.66036	3.96848	3.94177	4.68993	4.23738	3.70908	4.18688	4.31473	3.7812	4.19483	3.40884	4.39255	2.72166	4.51518	5.44381	4.02165	3.59305	4.58128	3.62039	3.40721	4.00581	3.8743	3.72902	4.4782	3.7172	3.8329	3.61114
H4C5	9.80933e-10	-9.00836	1.07183e-07	-0.536663	3.68821	3.6294	3.82181	2.99865	4.22886	4.24255	4.16258	3.52265	3.18524	3.38662	3.95379	3.89602	3.90327	3.90327	3.90327	3.7907	3.51051	4.29566	4.0939	4.21606	3.93267	3.52558	4.89151	3.78792	3.76396	3.25048	3.81652	4.14835	3.70649	2.7896	3.8024	3.78537	4.04486	3.40979	3.73903	4.1223	4.4403	4.25604	3.85918	3.72052	2.83995	3.78189	3.78707	3.49718	3.77603
B3GNTL1	9.87718e-10	-9.00537	1.07353e-07	0.648381	5.55697	5.70947	4.36438	6.13085	5.16461	5.07933	4.40255	3.91642	5.00118	4.31482	4.76919	5.55925	4.71835	4.71835	4.71835	5.20111	5.54743	4.63397	4.13051	5.90493	4.67324	5.83484	5.17374	4.37116	4.22308	5.99553	5.20904	5.19464	4.1799	7.22019	5.26039	5.85725	5.43743	4.45999	4.47713	5.59302	5.41145	6.03087	4.99067	4.20495	4.29166	5.49121	5.56036	4.7758	4.54474
PSMF1	1.00414e-09	-8.99821	1.08563e-07	0.730615	7.3591	6.76509	6.64278	7.02659	6.30922	6.31149	6.06767	6.14028	5.4096	7.96758	6.16988	7.11077	6.69175	6.69175	6.69175	8.56483	6.45707	7.05361	6.92919	7.60983	6.63443	6.92505	6.42495	6.83658	7.04939	6.88464	6.4877	6.3629	6.8908	7.25408	8.55458	6.66343	6.37562	6.36968	6.15789	6.48563	6.23371	7.67692	6.56234	6.00836	8.06914	6.31885	8.16516	6.44762	6.96246
TAGLN	1.05211e-09	-8.97794	1.13154e-07	0.682283	3.30012	3.61674	1.7966	3.27921	1.9387	3.94643	2.80308	3.04305	2.61829	2.92672	2.19459	2.00887	3.9169	3.9169	3.9169	2.71529	3.04429	2.41076	2.01533	3.14427	2.85782	3.68842	2.10164	3.52268	3.62883	2.74241	2.83541	2.75439	3.70369	2.88907	2.17526	2.29021	1.64286	2.6139	2.4671	2.29212	2.29658	3.83482	3.27667	2.837	4.91353	2.43585	2.10985	2.12443	3.55366
H3C1	1.117e-09	-8.95195	1.19507e-07	-0.781285	2.87196	1.71942	3.73323	2.34182	4.17364	2.27212	3.35335	2.59943	3.45642	1.32708	3.46176	3.53674	3.3461	3.3461	3.3461	3.08856	0.900461	4.7198	3.17719	3.97548	3.49311	1.02639	3.527	4.23562	2.54446	2.06084	1.84535	3.44041	3.27544	2.10834	2.91084	2.30795	2.77328	2.89883	2.6692	2.29212	2.41095	3.09551	3.90711	2.64679	1.87951	2.44588	2.52915	2.27059	3.1581
LAMP3	1.16818e-09	-8.93249	1.24336e-07	1.78261	5.35044	5.60117	4.6554	3.84906	2.25025	5.3361	3.21557	3.6458	3.46814	4.71777	2.93484	2.33388	3.62051	3.62051	3.62051	0.639352	4.2827	5.33069	3.55118	2.06969	3.48691	4.1401	3.17964	1.70408	5.53554	0.789996	3.22009	3.15959	3.15743	0.917625	0.358086	7.32641	5.73148	3.5853	2.94176	3.38562	4.36348	0.0827615	4.43707	4.20219	6.59903	2.61546	-0.410854	3.5963	4.01197
RN7SL587P	1.23409e-09	-8.90865	1.30674e-07	0.864896	2.70881	4.00464	2.14679	2.59039	1.11203	2.46292	0.328911	0.644569	1.71102	2.5368	1.46795	1.29457	1.23716	1.23716	1.23716	1.10445	2.93982	2.48303	1.62166	1.39916	1.87713	2.47337	1.12903	0.447663	1.49873	2.34724	1.20067	2.27127	2.01061	2.5117	1.1664	3.41975	3.47595	1.36171	1.87871	1.78377	2.00442	1.56179	1.6759	1.59208	2.54846	2.71837	1.68349	1.3465	2.35287
AC092652.2	1.2451e-09	-8.9048	1.31163e-07	0.430827	4.06714	3.72687	3.7393	4.19273	3.7935	2.698	3.02096	2.40695	3.37156	3.75373	3.27191	3.23062	3.49891	3.49891	3.49891	4.20304	4.112	4.09285	3.86539	3.56195	3.5947	5.11916	3.56358	3.44799	3.80036	4.52071	4.06586	3.72981	3.37398	4.10721	3.7783	3.91837	4.26743	3.69997	3.64627	3.46263	3.52202	3.961	4.18499	3.48154	3.35983	4.11933	3.32037	3.58109	3.83028
SLC25A23	1.34285e-09	-8.87197	1.40693e-07	-0.659145	3.08993	2.54446	4.42596	2.96382	4.25901	3.13454	3.65919	3.388	2.63918	3.01559	3.65277	3.4781	3.40047	3.40047	3.40047	2.66716	2.09092	4.39266	3.66536	2.91596	3.41683	1.07955	4.15455	4.08929	2.99534	2.9562	3.18808	3.46396	3.43612	2.2781	3.44752	2.87031	2.23989	3.89033	3.75123	3.21122	3.09771	3.19827	3.70952	3.60388	2.6028	2.93329	2.74978	3.46992	3.24782
POLQ	1.34927e-09	-8.8699	1.40693e-07	-0.67947	2.47492	0.874507	2.36688	1.74576	3.8252	2.08573	3.03922	3.35071	2.36595	1.37672	2.44173	2.94043	2.76463	2.76463	2.76463	2.80698	1.03137	4.43752	2.56796	2.87163	2.59482	1.92416	2.74262	2.68446	2.05533	1.9224	2.87616	2.93372	3.44287	1.88119	2.40243	2.11987	2.47405	2.54948	2.42711	2.4748	2.66766	2.15922	2.59814	2.0012	1.43642	2.52372	1.70587	2.00798	2.61133
MCOLN1	1.46672e-09	-8.83365	1.52168e-07	0.571643	5.1212	5.5785	4.43722	4.63782	4.33332	4.64263	3.83678	4.36603	4.47658	5.56937	4.26822	5.32647	4.61344	4.61344	4.61344	5.59919	5.20662	4.11901	4.65252	5.46223	4.39705	5.53765	4.11402	4.29365	4.53887	4.9493	4.8105	4.56783	4.71634	5.91966	5.24582	4.72453	4.43908	4.06508	3.83002	4.99424	4.85152	5.05679	4.57452	3.73971	5.20603	4.52627	5.5619	4.45285	4.4376
PLEKHA2	1.49001e-09	-8.82681	1.53808e-07	0.297097	7.47113	7.82688	7.38286	7.47296	7.4664	7.56109	6.99176	6.43349	7.08385	7.47267	7.02136	7.44058	7.14946	7.14946	7.14946	7.36717	7.45957	7.27986	7.06588	6.96097	7.15481	8.00937	7.17915	6.63977	7.51308	7.48701	7.17326	7.44834	7.3746	7.06882	7.29234	7.41605	7.69079	7.22461	7.26695	7.3627	7.41477	7.17217	7.07281	7.11787	7.59504	7.19484	6.96521	7.55133	7.12024
UNC93B1	1.54201e-09	-8.81191	1.5838e-07	0.669271	7.64975	8.04486	7.41975	6.87706	6.5773	7.83735	6.65573	6.20875	7.92355	7.83289	7.09859	6.81099	7.16132	7.16132	7.16132	6.45789	8.10139	7.05573	7.17242	6.43565	6.91073	8.09213	6.83383	6.2387	7.50345	7.22221	7.51067	7.40186	6.94315	6.82628	6.32676	8.49663	7.70812	7.00585	6.7215	7.39101	7.4748	6.53889	7.20931	6.91589	7.85381	7.22719	6.34385	7.37338	7.38245
AL109918.1	1.59484e-09	-8.79728	1.62991e-07	-1.00686	0.343259	-0.518506	0.296705	-0.191909	1.35474	0.343685	1.9547	1.3715	1.19449	-2.46497	1.35898	0.959447	1.02699	1.02699	1.02699	0.991727	-0.57798	-0.411615	0.082255	1.12483	0.583988	-1.49355	1.98663	1.52186	0.0464664	-1.84472	1.15725	1.64643	1.20517	-0.300203	-0.967205	-0.0630846	0.722579	1.1042	0.495591	0.588689	0.287139	-0.745959	0.042475	0.476002	-0.802644	0.836871	-0.996625	-1.21848	-0.216391
CHEK1	1.62202e-09	-8.78994	1.64317e-07	-0.675264	1.58048	-0.217125	2.05231	0.654842	2.55034	1.3978	2.17996	2.68183	1.35465	0.451003	1.77415	2.23819	1.8047	1.8047	1.8047	1.5647	0.830266	3.82933	2.01533	2.35372	1.71671	0.0609361	2.06809	2.35443	1.05238	0.912091	2.28935	2.13124	2.25239	0.951492	1.26217	1.30469	1.98376	1.52377	1.63718	1.52117	1.65839	1.54108	2.308	1.39314	0.442764	1.08813	1.10957	1.19494	1.82107
EGFL7	1.6281e-09	-8.78832	1.64317e-07	-0.78686	2.24526	1.83323	2.98353	3.22141	2.65483	3.14253	2.66089	3.01947	2.09058	0.88762	3.30166	3.51939	2.3278	2.3278	2.3278	2.44256	1.69631	1.18504	3.19803	3.52903	2.42349	0.258256	2.3264	4.04605	1.61227	0.852335	2.8627	2.41107	2.5744	1.63249	-0.0967741	1.50256	3.35477	1.70368	2.19676	3.26513	2.5169	1.21484	0.916732	1.79651	0.82446	1.73734	0.931161	2.42617	1.91535
TTC9	1.63181e-09	-8.78733	1.64317e-07	0.624057	3.94665	3.12088	2.82111	2.8284	3.77507	3.59686	3.998	3.29943	3.14198	3.93451	3.20264	2.71524	3.22532	3.22532	3.22532	3.32405	3.83567	3.58851	3.77579	2.90867	4.03402	4.08268	3.73016	4.18131	3.76396	3.96577	2.80759	2.89959	3.9341	4.10345	3.97485	2.70607	1.91194	3.74175	3.51412	2.85476	2.75687	3.57448	3.79693	3.69715	3.6919	3.29695	5.04578	3.78946	3.8732
H2BC15	1.70021e-09	-8.7695	1.7037e-07	-0.47069	4.16795	3.73274	4.81641	3.7435	4.82493	4.15043	4.7972	3.95421	4.38677	3.69623	4.65571	4.79619	4.42836	4.42836	4.42836	3.73925	3.83119	5.41887	4.58817	4.93603	4.58305	3.26378	4.56258	5.31022	4.05252	3.35106	4.13465	4.57054	4.15548	3.41123	4.05057	3.58893	3.91002	3.94502	4.13629	4.57329	4.24856	4.32731	4.16213	4.19664	3.62783	3.97785	3.74448	3.92409	4.47214
TCN2	1.7436e-09	-8.75855	1.73869e-07	0.839052	4.97697	5.41994	4.55905	4.18267	3.60811	5.51298	4.35716	6.27163	5.60279	5.33831	4.17887	2.84156	5.2959	5.2959	5.2959	3.40698	5.2907	4.81887	2.81286	3.54793	3.02129	4.47864	2.66993	3.0436	4.81569	3.31831	3.99978	4.56511	5.7316	3.77028	3.03127	4.24742	3.17211	4.21205	4.05989	3.36725	4.73925	3.61468	3.33624	4.37168	5.87604	4.15341	4.5877	4.73288	4.42484
NSL1	1.7629e-09	-8.75377	1.74945e-07	0.345491	5.5727	5.49967	5.22433	5.84853	5.32048	5.60261	4.99109	4.97865	4.83456	5.41308	4.7798	4.72485	5.55428	5.55428	5.55428	5.11178	5.7016	5.54239	5.15181	4.80466	5.39867	5.51129	5.32817	5.12285	5.67764	5.49249	4.96644	5.52495	5.54758	5.12383	5.26329	5.91338	5.94146	5.15397	5.12804	5.1239	5.29878	5.29957	5.32654	5.34135	5.78497	5.33399	5.27443	5.47061	5.44389
PIGC	1.80197e-09	-8.74425	1.77961e-07	0.669767	4.0605	3.24123	3.85016	3.10902	3.371	3.37738	3.77272	3.4481	3.05136	3.25343	3.29428	3.19465	3.67767	3.67767	3.67767	5.23245	3.16327	3.95081	4.04871	4.68382	3.91429	3.49656	3.10991	3.61662	4.36754	3.49478	3.75958	3.16678	4.17181	3.9735	3.204	4.2007	3.51688	3.7703	3.34199	3.14087	3.38571	3.09551	3.27057	3.64517	4.99028	2.72662	3.05005	2.99145	3.89188
ITGA1	1.8323e-09	-8.737	1.80092e-07	-0.593897	4.00102	4.29422	3.86692	4.17761	4.81142	4.0605	3.01482	3.71592	3.30775	3.12131	4.29435	5.13858	4.23517	4.23517	4.23517	4.52335	3.97232	4.13191	4.48452	4.22489	4.24358	4.60637	4.00595	3.58907	3.51664	3.12983	4.2631	4.9828	3.72597	4.2704	3.42183	4.44476	3.86635	2.83848	3.9264	5.00616	4.3508	3.961	4.11868	2.45577	3.12008	5.20997	2.9505	4.70743	3.29067
ALDH1L2	1.86102e-09	-8.73025	1.82043e-07	-0.915635	1.30506	0.177069	1.8649	0.711926	3.07961	0.597337	2.05386	2.58879	2.55373	-1.48679	1.61738	1.49714	0.867678	0.867678	0.867678	1.20899	1.55112	0.240058	1.46995	2.65336	1.67366	-0.167713	2.12359	1.61584	-0.218941	-0.0505548	2.22771	3.06268	1.69761	0.951492	-0.157447	0.851638	1.02454	0.97001	0.71075	1.08471	0.888056	0.391179	-0.594696	1.46869	0.0838085	1.80125	0.383379	1.19494	0.470627
SIRPB2	1.87381e-09	-8.72727	1.82426e-07	0.602134	7.86577	8.21488	7.15121	6.67029	7.52548	6.77959	6.96055	6.39049	7.93521	7.23846	6.46104	8.19304	7.7485	7.7485	7.7485	7.10177	8.16471	6.96491	5.94218	7.84771	6.62245	8.63393	6.13948	6.54021	5.88955	8.20303	7.87973	7.79636	7.09908	8.78031	6.86381	8.16091	8.56111	6.94365	6.87756	7.99827	7.95368	8.03747	7.51181	5.8443	7.0076	7.61643	8.15529	6.26939	7.74378
IGHV3-11	1.90946e-09	-8.71909	1.85019e-07	-1.48116	0.163633	-1.22503	1.01029	0.175847	3.48311	0.852505	1.48931	-0.776747	-0.384719	-2.46497	0.386479	0.0926117	-2.1399	-2.1399	-2.1399	-1.91688	-2.85718	-1.31987	-0.498981	1.48012	-0.199563	-0.597457	1.12903	-0.424194	-2.59903	-1.21387	-0.925651	2.3365	0.0538967	-2.12761	-1.33657	-3.18597	0.83041	-0.4407	-0.991737	0.455912	-0.556772	0.565349	-2.54016	0.615507	-2.08021	-0.532773	-1.73521	-0.381105	-0.799986
AL133467.1	1.9711e-09	-8.70529	1.90095e-07	-0.916667	0.793949	0.831326	1.7249	-0.0908156	2.65483	0.964945	1.50692	0.762862	2.41523	-2.46497	1.75277	0.567857	0.288181	0.288181	0.288181	1.17498	-0.782763	0.883182	1.13726	1.33531	1.02185	0.258256	2.31691	2.16844	1.4073	-0.599106	0.351794	1.89184	0.39718	0.570636	-0.157447	-1.27753	0.83041	1.58014	-0.381909	0.203224	0.0567027	0.245196	-1.12687	0.85959	-0.711413	1.34557	0.931161	1.11274	0.00561075
XRCC2	2.04898e-09	-8.68846	1.96683e-07	-0.682606	1.03346	-0.217125	0.229211	0.819733	1.97144	0.398109	1.60828	2.06707	1.30321	0.304776	1.44147	0.993341	1.65007	1.65007	1.65007	0.639352	0.0960209	2.79025	1.01728	1.96106	1.02185	0.511333	0.992612	1.22055	1.01157	0.0592382	1.78956	1.66686	1.79569	0.882943	0.400796	0.643813	1.61297	0.758324	0.607178	1.28065	1.0537	0.645135	1.47853	0.772826	0.361047	0.675715	0.89267	0.900503	0.860171
SLC35D3	2.15334e-09	-8.66689	2.05739e-07	-0.885239	-0.108684	-4.34055	1.04995	0.819733	0.499213	0.287128	0.288758	1.44412	0.168915	-0.688887	0.440966	0.815302	-0.330951	-0.330951	-0.330951	0.101419	0.678717	-1.81858	0.851747	1.07357	-0.783666	-0.774792	-0.144869	1.04245	-1.13835	-0.776423	1.06627	0.327747	0.0182261	-0.0789505	-1.08014	-1.50644	0.881446	-0.775917	0.743685	0.857912	0.956612	-0.236686	-0.889987	0.193785	-1.37267	-1.50876	-0.14755	0.145302	0.0726183
POU2AF1	2.21423e-09	-8.65478	2.10578e-07	-0.993262	5.67565	5.64391	7.11778	5.62714	7.61822	6.052	6.53273	4.71076	6.14407	4.20229	6.70667	6.26443	5.69936	5.69936	5.69936	5.83664	2.97278	4.95215	5.74144	6.21983	6.19582	3.95338	7.19413	6.31214	5.38989	2.67501	5.25095	6.73239	5.90397	4.0845	5.12843	3.10152	5.6602	6.67697	5.56808	5.80121	5.40226	4.95088	3.94204	6.23961	4.27223	6.02886	4.98761	6.23904	5.12277
IGHV1-69	2.22466e-09	-8.65274	2.10594e-07	-1.61438	-0.445714	-1.05335	1.04995	-2.05893	2.41405	-2.7668	-2.41682	-2.85295	2.20711	-2.15173	0.971793	-4.34055	-0.207517	-0.207517	-0.207517	-1.64976	-2.14142	-2.9725	-0.498981	-3.5159	-1.19784	-4.34055	0.760252	-0.759719	-0.0366934	-1.49508	-0.205534	-0.475558	1.60446	-0.382196	-0.429412	-3.18597	-1.00702	1.75355	0.287986	0.0272092	-2.12349	0.894043	-2.9316	-0.275732	-0.544624	1.30205	-2.73926	-3.44815	-3.3646
MEF2A	2.27864e-09	-8.64232	2.14715e-07	0.654609	7.72835	8.10954	7.14893	8.09196	6.96293	7.07983	6.44582	6.28899	8.07211	7.19328	6.9817	7.16009	6.92209	6.92209	6.92209	7.59809	7.97163	6.92192	7.02709	6.93697	6.46407	8.85653	6.8953	6.08121	7.0246	7.93563	7.54056	7.67425	6.55267	7.44784	6.24268	8.07674	8.45455	6.70629	6.30926	7.85538	6.84629	6.68525	6.51479	6.48052	7.24998	7.76456	6.55653	7.45314	6.77901
IL18	2.41436e-09	-8.6172	2.26465e-07	0.531342	2.50536	2.16427	1.26742	1.47602	1.74397	2.32926	2.01747	2.41901	1.62984	2.66222	1.17834	1.52058	2.79447	2.79447	2.79447	1.80605	2.94813	1.6291	1.46995	2.24209	1.24413	3.11896	1.38663	1.65179	1.95128	2.4716	2.32903	2.59292	2.47922	2.6928	1.89062	2.19807	2.95104	1.92295	1.70564	2.11262	2.20091	2.0753	1.98966	1.76688	1.80421	1.61819	2.67236	1.24725	1.74093
TFEC	2.45017e-09	-8.6108	2.28779e-07	1.01108	6.42614	6.76581	4.87002	5.67816	5.10129	6.10919	5.47655	5.97854	3.92475	7.00386	4.91105	4.15751	6.39942	6.39942	6.39942	5.07075	5.87506	6.15517	5.36805	4.68382	5.25637	6.82062	4.41469	4.41365	7.04117	4.84585	4.78932	5.42503	6.12864	4.63327	5.12206	7.52104	6.54841	5.36654	3.98267	5.49209	6.08564	5.44599	5.42997	5.2967	7.7553	5.12198	5.67679	5.61942	5.63336
AC079171.1	2.71831e-09	-8.5657	2.52668e-07	-0.869113	-0.100771	-1.22503	0.4229	-0.418203	0.783634	0.550049	0.367978	-0.89123	0.652664	-0.590195	-0.407843	0.696878	-0.0938156	-0.0938156	-0.0938156	-0.523337	-0.676741	-0.338606	1.10819	-0.603121	-0.0477314	0.726571	0.731964	-1.07513	-1.13835	-0.978629	-0.32362	0.106256	-0.304181	-0.300203	-2.6004	0.262205	-3.14064	0.657141	0.570933	1.40592	1.59528	-1.54015	-0.686571	-0.473688	-1.23922	0.60585	-2.73926	-0.381105	0.470627
LRP8	2.78637e-09	-8.55496	2.57827e-07	-0.376045	4.08881	3.48362	4.30005	3.95334	4.24569	4.30441	4.22243	4.53071	4.07799	3.42842	4.67003	4.45679	4.42121	4.42121	4.42121	3.72756	3.91836	4.83671	4.5153	4.31868	4.5115	3.75528	4.15188	4.65193	4.54246	4.09386	4.2268	4.03109	4.74526	3.70725	4.16339	3.63183	3.53293	4.13887	4.01	3.81862	4.04714	4.24967	4.47202	4.45532	3.97546	4.12247	3.95058	4.22729	4.2657
SLC8B1	2.88133e-09	-8.54041	2.65419e-07	0.320676	5.26857	5.21682	4.90288	5.83575	4.80235	4.96003	5.15781	4.80109	5.46915	5.20208	4.81375	5.30975	4.75675	4.75675	4.75675	5.59598	5.22212	5.09406	4.80977	5.1019	4.38709	5.72654	4.34403	4.65415	4.65273	5.41715	4.77502	5.16622	4.94608	5.62398	5.04674	4.95313	5.58714	4.89536	4.85979	5.0548	4.3088	5.49392	5.03987	4.88916	4.90994	5.36736	4.95996	5.08514	4.84225
IGLV1-40	2.99724e-09	-8.52328	2.74863e-07	-1.41616	4.88913	5.1957	6.86055	4.08342	6.26202	5.2257	4.72004	3.04305	5.16862	1.7971	7.60184	4.63376	4.81615	4.81615	4.81615	3.67985	-0.8972	3.61632	4.88668	6.29658	5.47118	2.51255	5.80971	5.10026	3.57382	1.48438	3.05243	6.35347	4.48929	2.97391	3.62463	0.989952	5.54621	5.07445	4.02682	4.6154	5.31682	4.8387	2.31985	5.83719	3.38071	5.33399	4.29114	4.21421	4.92844
LINC00570	3.06627e-09	-8.51339	2.79944e-07	1.1026	1.23354	-1.05335	-0.85039	0.400825	-0.792379	-0.771032	0.204934	1.29502	-0.225162	2.00081	-0.507509	0.269	-0.149546	-0.149546	-0.149546	2.61737	-0.485548	-0.202818	0.449803	1.62957	0.0225843	0.586704	0.516699	0.70881	1.63931	0.724842	0.865037	-1.01184	0.554873	0.526378	1.57348	1.03326	-1.4363	-0.598594	-0.887194	-0.103323	-0.217669	0.792577	0.042475	-0.87937	1.47577	-1.50876	2.0055	-0.381105	1.58901
ECHDC3	3.12839e-09	-8.50468	2.84351e-07	1.32245	3.47227	5.46301	0.697176	0.711926	1.11203	1.68724	2.40324	2.75978	3.81885	2.07788	0.815594	3.03296	2.00941	2.00941	2.00941	1.95379	4.20854	1.32644	1.24803	3.48066	0.799578	3.47688	0.992612	0.527222	1.86226	1.6689	1.67106	2.16035	1.56792	5.13861	1.51636	2.30795	4.82206	0.997866	1.23555	2.14173	0.989706	1.75399	2.27184	1.31341	1.6579	2.00498	3.39111	0.651562	1.22666
AL353759.1	3.2533e-09	-8.48768	2.94402e-07	-0.821234	3.09135	3.88304	3.13873	2.57509	3.99008	4.0731	3.56567	2.28044	3.52538	1.74133	4.0964	3.76481	2.84525	2.84525	2.84525	2.01275	3.30588	1.9537	3.76186	3.18106	3.54181	3.32008	4.15721	1.98335	3.13488	2.6401	4.04814	4.40708	2.21349	2.72253	1.1664	4.08712	4.29593	3.04617	3.55644	4.8093	4.56905	1.45515	3.52727	3.49967	0.913144	4.27656	1.93148	4.12267	2.9511
FKBP15	3.30042e-09	-8.48143	2.97356e-07	0.417343	7.58603	7.96408	7.25295	7.84442	6.99464	7.5906	6.61419	6.85739	6.93233	7.57424	6.70528	7.06667	7.19422	7.19422	7.19422	7.3071	8.03906	7.2975	6.74137	6.71243	6.56471	8.11975	6.66221	6.23796	7.22589	7.75977	7.29095	7.842	7.39538	7.64182	7.18685	7.35762	7.7542	7.00285	6.87012	7.75092	7.55817	7.4531	7.06359	6.90319	7.74602	7.38183	7.19808	7.479	7.28956
CALU	3.46551e-09	-8.46023	3.10644e-07	-0.398389	4.81633	4.89642	5.151	4.98038	5.90007	4.77448	4.86363	4.70091	4.32364	4.65627	4.94679	5.17226	5.29851	5.29851	5.29851	4.85678	4.40546	5.25014	5.17127	5.21118	4.75555	4.72788	5.06454	4.94052	4.42305	4.53977	4.49008	5.28168	5.14937	4.18401	4.71777	4.21487	4.4644	4.94449	4.42731	4.89728	4.59616	5.01798	4.40126	4.6726	5.05342	4.89366	4.89572	4.81964	4.88249
SKA1	3.47815e-09	-8.45865	3.10644e-07	-0.940938	1.24056	0.593606	1.23338	0.870759	2.87849	0.597337	2.25482	2.05166	1.45233	-2.15173	1.93466	1.71593	1.72946	1.72946	1.72946	1.17498	-0.8972	3.6391	1.60094	2.10841	1.73777	0.34764	2.13443	1.40034	0.739012	-0.298914	1.60795	2.21688	1.78511	0.282099	-0.220784	0.643813	1.5194	1.95172	1.16436	1.42972	1.75779	0.0827615	1.69423	0.581875	-0.135879	0.86705	0.142201	0.530146	1.03836
IGLV2-14	3.57983e-09	-8.44614	3.18342e-07	-1.14617	5.04169	6.07604	6.08228	4.49062	7.44616	6.35942	5.23644	3.80134	5.22844	2.36295	5.43693	4.86874	4.10428	4.10428	4.10428	5.72793	0.596521	4.55952	5.56679	4.99404	5.78617	4.74031	6.1462	6.89867	4.95673	1.86308	2.95436	6.88081	4.92215	3.14466	3.84168	3.39506	4.82206	5.16323	5.48773	5.94954	5.08955	3.88908	3.59712	6.09734	3.71675	4.87151	5.81313	4.95161	5.13261
PARP4	3.61544e-09	-8.44184	3.20122e-07	0.497367	8.5602	9.14993	8.43226	8.59728	8.17038	8.68151	7.62974	7.16729	8.76964	8.38286	7.89105	8.1696	8.14614	8.14614	8.14614	8.05756	9.0911	8.36851	7.6772	7.4604	7.52627	8.74631	8.05663	7.00974	8.10656	8.47169	8.28127	8.55853	7.82604	8.39361	7.70505	8.65967	8.93403	7.99244	8.16648	8.47148	8.45289	8.06311	8.05559	7.91581	8.23477	8.42775	7.89484	8.38142	7.84518
AC114980.1	3.78437e-09	-8.42201	3.33642e-07	0.450096	3.37284	3.27385	2.53003	3.10902	3.18807	2.5616	2.35545	2.15624	3.55866	2.92672	2.73128	2.53137	2.79447	2.79447	2.79447	3.15113	3.30588	3.18631	3.10544	2.51611	3.44911	3.98854	3.14788	2.74395	3.09637	4.0006	3.39852	3.23679	2.31253	3.55033	2.27046	2.97396	3.84722	2.84617	2.78447	3.39774	3.1203	2.98486	3.20177	2.81545	2.58492	3.46422	2.77116	3.09499	3.00356
CDH23	3.82213e-09	-8.4177	3.3553e-07	0.568089	6.97389	6.95936	6.5645	7.17987	7.46137	7.11478	6.68648	6.24138	7.80605	6.79262	6.30362	5.50595	6.60074	6.60074	6.60074	6.20857	6.8788	6.54163	6.41546	6.3263	6.08311	6.83712	6.44469	5.83379	7.18231	5.55474	6.77397	6.79697	6.31106	6.72038	6.11142	6.85965	7.41957	6.37434	6.13403	6.29957	7.06342	6.32162	6.34391	6.31383	6.89643	6.8594	6.80863	6.73316	6.72731
IGLV1-44	3.8421e-09	-8.41543	3.35571e-07	-1.38072	3.72024	4.8512	6.20593	1.94937	5.21846	4.63981	4.61028	2.62048	3.51411	1.10941	4.34524	1.71593	4.19378	4.19378	4.19378	3.11571	-2.85718	1.98248	4.71411	4.89047	4.2835	2.32719	5.06171	5.02346	2.82914	0.256548	2.67531	5.15722	3.23328	2.13806	2.47417	0.46559	2.68984	6.75505	2.09833	4.8671	4.48741	3.17158	1.24981	4.89259	1.22171	3.38301	2.61441	4.26266	3.96865
JDP2	3.86744e-09	-8.41258	3.35571e-07	0.694764	6.41396	7.55142	5.55237	5.34761	5.88404	5.89409	5.33708	4.873	7.2009	6.29125	5.41668	6.36171	5.83027	5.83027	5.83027	6.29424	7.09956	4.84848	5.43836	5.61233	5.52364	6.56511	5.65163	5.2732	5.16878	5.73099	6.10613	6.08588	5.16882	7.37093	5.52939	6.32522	7.40547	5.52689	5.34613	6.22757	6.10936	5.55199	5.72896	4.90964	5.43544	5.82681	5.56343	5.8173	5.21278
SCD	3.8716e-09	-8.41211	3.35571e-07	-0.578965	3.03843	2.9294	3.51679	3.07679	2.90416	2.90949	3.32881	3.87762	3.06686	2.69194	3.56962	3.42941	3.1173	3.1173	3.1173	2.77327	2.4125	4.00791	3.42129	2.79459	2.70584	1.73833	2.47888	3.73444	2.54446	2.62232	3.15534	3.60829	3.50861	2.56736	3.23973	2.65152	2.50692	2.7264	2.62569	3.05166	2.83179	3.09551	2.73723	2.45577	2.80175	3.33524	2.77116	3.25683	3.27653
CLNK	4.02794e-09	-8.39492	3.47655e-07	-1.37639	0.904473	-1.22503	0.158404	-2.05893	-0.105608	-1.03378	0.406014	1.60058	0.049131	-1.03337	0.593071	-0.108386	-0.465944	-0.465944	-0.465944	0.0270995	1.17988	-0.845121	-0.0425976	0.720632	-1.04618	0.726571	0.841935	0.807716	0.0464664	-1.21387	1.70161	-0.229121	-1.13612	0.171493	0.123226	0.187498	-1.71084	3.45571	-0.122503	-1.89036	0.438631	0.757105	-0.0767838	-1.08009	-0.467944	-1.36153	2.28353	-0.845473	-0.925145
AL031777.1	4.08224e-09	-8.3891	3.50867e-07	-1.02389	2.6077	2.2812	1.56985	1.77284	3.6989	3.78221	3.53596	1.29502	2.59708	0.817443	3.78503	3.66845	2.13134	2.13134	2.13134	2.05076	3.23294	0.721873	3.73358	2.25365	3.49929	2.80856	4.49895	-0.351229	3.0668	1.22643	3.36073	3.99922	1.47888	2.74201	0.521825	3.34438	4.79237	2.22353	2.92032	4.15479	3.94116	1.71755	2.66472	3.30728	-0.467944	3.83248	1.00519	3.34348	1.98658
VSIG4	4.17633e-09	-8.37921	3.57459e-07	1.58007	2.79215	3.74443	0.158404	-0.546222	0.0859971	0.597337	-0.189656	3.83774	3.88157	-1.03337	1.17834	-1.25444	0.288181	0.288181	0.288181	1.14014	2.33857	-1.46775	-1.17037	0.505424	-0.462253	2.37049	-1.67822	1.33552	-3.22157	1.48438	0.865037	0.606901	0.424688	3.94436	0.953391	2.25405	1.27411	-0.775917	-0.246384	0.455912	0.485788	1.41018	0.204697	-1.75398	-0.711413	0.286668	5.3474	-1.72288	-0.684824
HEATR5B	4.24817e-09	-8.3718	3.621e-07	0.368556	6.66291	6.42366	6.67326	6.14388	6.21237	6.70667	5.87178	5.70694	6.30144	6.79491	6.12794	6.06372	6.30475	6.30475	6.30475	5.84882	6.59906	6.65379	6.10831	5.41668	6.39119	7.23575	6.1171	5.71988	6.40193	6.47446	6.52555	6.51857	6.54054	6.23792	6.54179	6.89456	6.59215	6.54513	6.50985	6.30038	6.73907	6.47209	6.55859	6.48166	6.59289	6.53339	6.24705	6.54617	6.65468
PTP4A3	4.28459e-09	-8.36809	3.63695e-07	-0.651735	4.52439	4.28625	4.20224	4.22741	5.59061	3.56153	4.47815	3.5721	5.02519	3.54701	4.78771	6.22842	4.40195	4.40195	4.40195	4.35128	3.105	4.20088	5.4644	5.81903	4.54474	4.2942	4.48206	5.0657	3.64226	4.80309	5.3141	5.76065	3.55603	5.25675	5.98292	4.16707	4.18857	4.40384	4.61033	4.80476	4.3186	5.50999	4.20431	4.21869	4.35371	4.56361	4.9365	4.78909	4.19228
ZNF366	4.4676e-09	-8.34993	3.77669e-07	0.824961	2.20547	3.46961	2.03265	1.05853	1.3297	2.31519	1.27994	2.95466	2.57557	1.96879	0.815594	1.02646	1.74482	1.74482	1.74482	0.735837	2.44809	1.55439	1.88427	0.848114	1.18404	1.18031	0.760252	0.1787	1.52797	0.912091	2.77923	0.426923	1.53043	1.7717	1.23881	3.76624	1.91194	1.17911	0.71075	0.959505	1.85079	1.13418	0.350508	1.09238	2.21802	1.46877	0.437861	1.08427	1.03836
HASPIN	4.5294e-09	-8.34396	3.81323e-07	-0.845736	0.941291	-0.31076	1.5423	0.819733	2.47241	-0.449386	1.94181	1.49058	0.38223	-0.411012	1.56927	1.75597	1.21526	1.21526	1.21526	1.17498	-0.8972	3.00884	1.7017	1.90352	1.24413	-0.774792	1.7811	1.78723	-0.124941	-1.49508	1.84535	1.8567	1.18921	0.433569	0.0174153	0.262205	1.15472	0.389154	0.456392	0.670869	0.816079	0.683432	1.27438	0.237642	-0.802644	0.89661	-0.317643	0.932802	-0.298692
IGLV2-23	4.65019e-09	-8.33253	3.89894e-07	-1.30266	4.11218	3.17369	4.66501	3.77732	5.55325	5.825	4.53074	2.58879	3.92475	0.986873	6.99371	4.71726	3.26848	3.26848	3.26848	1.89231	-1.47541	2.2661	3.66036	7.061	4.07596	2.91475	5.09679	4.48014	3.73918	1.22643	2.80759	5.84152	4.26226	2.92361	3.69496	0.751464	5.26077	3.77433	3.49973	4.56525	3.64657	3.01521	1.97474	4.77474	3.21034	4.26244	3.72817	4.82396	3.9948
SLC7A7	4.77988e-09	-8.32058	3.9914e-07	0.526588	6.3102	6.8695	5.64915	5.67995	5.1787	6.34996	5.60678	6.43942	5.77786	6.74675	5.15058	4.66301	6.60705	6.60705	6.60705	6.50571	6.86844	5.75435	5.40737	5.45724	4.91886	6.0348	4.46282	5.66488	5.92157	5.65214	5.55901	5.86493	6.49828	5.95034	6.47216	5.16752	4.46021	5.52928	4.95427	5.77008	5.35383	6.66207	5.40097	5.49381	7.44137	5.4141	6.88843	6.13182	6.33378
LINC02068	4.85755e-09	-8.31358	4.03983e-07	1.89973	3.73052	3.41946	0.646334	0.254803	-0.68642	5.02632	2.51188	2.72133	0.732608	5.01094	-0.144504	0.153835	2.41683	2.41683	2.41683	-2.67031	0.553598	3.16764	-1.67734	-0.372374	3.37713	1.67066	2.79825	-1.33167	2.37785	-0.978629	2.4952	2.10152	1.07233	-1.14183	-2.98414	2.70607	4.07805	0.00591187	-0.789717	-1.4824	0.117853	-0.6476	3.46458	0.85959	4.88275	1.18714	0.00458762	-0.739872	3.37936
RRM2	4.95139e-09	-8.30527	4.10127e-07	-0.952875	4.11417	3.02831	4.45948	3.65166	5.98871	2.96463	4.9304	4.17654	4.35555	1.55981	4.80858	4.71726	4.7737	4.7737	4.7737	3.84037	2.20626	6.55067	4.44728	5.21266	4.05095	2.60609	4.9247	4.84089	3.17239	2.85326	4.15134	5.23454	4.58687	3.0065	3.58351	3.13172	4.29122	4.30417	3.96881	4.10762	3.78497	4.06981	4.96259	3.56568	2.08436	4.05525	3.11836	4.26266	4.01623
DNAAF1	4.98256e-09	-8.30255	4.11051e-07	1.74653	2.05746	1.87636	-3.24468	-1.01691	0.543442	1.34336	0.960224	2.41901	0.38223	1.04944	0.815594	-0.108386	0.20174	0.20174	0.20174	-0.134116	0.596521	-0.655828	0.495426	0.785781	1.48731	-0.597457	-0.972001	-0.501047	2.95286	-1.21387	2.20656	1.78373	-1.84933	0.695804	-2.29758	3.06024	0.978403	-1.34715	-0.312556	1.35711	0.531452	-2.9051	1.98966	0.711941	2.5392	-3.52093	-0.996625	-2.50511	0.0726183
NCKAP5L	5.17823e-09	-8.28582	4.25485e-07	0.382963	5.82929	6.38778	5.87296	5.8196	5.34098	5.65663	5.30975	5.01287	5.74451	5.82882	4.94208	5.79731	5.53673	5.53673	5.53673	5.99976	5.67931	5.29528	5.61021	5.39727	4.53575	6.5985	5.02574	5.28612	5.13355	5.68034	5.84216	5.71723	5.51675	6.15041	5.52094	4.94748	5.23402	5.23374	5.01455	5.8626	5.23638	5.76564	5.15021	4.78586	5.98149	5.79282	5.67395	5.91755	5.42798
CCR5AS	5.38068e-09	-8.26916	4.38892e-07	1.0665	2.27672	4.28224	0.793781	2.24845	1.4738	2.31519	0.247454	0.800231	-0.384719	2.26088	1.11272	-0.18213	1.42056	1.42056	1.42056	2.10596	2.70503	1.55439	0.851747	1.61171	0.914989	1.5628	1.12903	-0.281778	1.83913	1.70314	1.73153	2.07118	1.31214	0.847407	1.62843	1.33961	3.09853	1.68667	0.0972919	2.48619	2.59425	1.26621	0.604204	1.79651	2.39268	1.44895	1.46479	0.900503	1.63407
MT2A	5.38413e-09	-8.26888	4.38892e-07	1.23645	7.52864	7.57575	7.22724	4.8936	5.59718	8.24831	6.01018	7.61152	6.5994	7.89729	5.78246	5.3577	6.97883	6.97883	6.97883	3.87786	7.10978	7.48987	6.95493	5.42181	7.78425	6.40905	6.88611	5.37348	8.20374	5.0558	6.52448	6.37692	6.81584	5.25336	4.86802	8.55514	7.78343	6.72046	5.87445	5.67621	7.78808	4.61177	6.5454	7.54838	8.36509	5.40385	5.03477	5.81622	7.46855
KIFAP3	5.80631e-09	-8.2361	4.71254e-07	-0.322258	4.20338	3.75024	4.70593	4.44505	4.2853	4.42399	4.3523	4.6378	3.1124	4.51377	4.29805	3.94447	4.43785	4.43785	4.43785	4.24872	3.75271	4.55234	4.07148	4.11511	4.42328	4.03638	4.28197	4.69132	4.47276	4.34757	3.93697	4.40708	4.69532	3.5777	4.07055	3.64585	4.1784	4.62984	4.60586	4.87145	4.50754	4.03691	4.67254	4.60305	4.43084	4.41322	4.31317	4.42758	4.28702
PFKFB2	5.82701e-09	-8.23455	4.71254e-07	1.42912	6.85857	7.01288	3.70245	6.94486	4.11989	4.46281	5.00819	3.86003	6.91851	4.49983	3.79028	5.02232	4.75296	4.75296	4.75296	5.64339	7.25876	4.34081	3.30439	5.1568	3.50544	8.86342	3.64169	3.21557	3.0668	6.17699	5.13262	5.39931	3.45292	7.09225	3.86475	5.70655	8.07888	3.89405	4.01675	5.76775	4.56905	4.45733	4.55209	3.30212	3.5562	5.58157	4.66682	3.58109	3.65553
IGLV8-61	5.91944e-09	-8.22772	4.76851e-07	-1.51503	3.21127	3.29784	4.97161	1.69002	3.83857	3.89531	1.94181	0.836657	2.88639	0.0834417	4.21058	2.90526	3.89641	3.89641	3.89641	3.15113	-0.8972	1.39227	1.24803	2.57259	3.34319	3.91734	5.05886	3.20956	1.95128	-0.599106	1.01853	2.68596	1.01918	0.112839	2.45404	1.03326	2.52309	2.86897	3.17697	3.0895	5.02118	1.62219	0.152624	3.42576	0.0838085	4.81844	3.2073	4.49402	2.10335
TCF19	6.13214e-09	-8.21239	4.92057e-07	-0.644824	2.68346	1.62143	3.50257	2.34182	3.90788	2.43716	3.44298	2.91263	2.73933	1.62289	2.98154	3.08104	2.63868	2.63868	2.63868	2.93444	0.999737	4.21004	2.86593	3.29173	3.20638	0.854068	3.42467	3.69192	2.22558	1.97938	2.1851	3.28386	3.24104	1.54646	2.04669	1.97191	2.3345	3.05283	2.92032	2.53089	3.05926	2.4969	3.10918	3.47239	2.3615	2.65059	1.93148	2.67559	2.7912
ALDH3B1	6.22343e-09	-8.20597	4.97438e-07	0.435123	6.00716	6.34716	5.3822	5.48495	5.27366	6.04028	5.43231	5.75531	6.60605	6.07707	4.78508	6.00158	5.83387	5.83387	5.83387	5.62461	6.67111	5.51557	5.02921	5.87718	4.59752	5.93198	5.03011	5.45965	5.84669	6.12427	5.75382	6.01493	5.60881	6.01483	5.56503	5.90612	5.9233	4.9009	5.66152	5.71061	5.69717	5.80091	5.32065	5.17086	6.05154	5.43566	5.8712	5.583	5.68111
SHISA4	6.47848e-09	-8.18853	5.15817e-07	1.02045	2.10293	1.37309	0.4229	-0.191909	0.783634	1.25765	0.647417	1.74172	0.652664	2.1367	0.640406	1.1518	1.34191	1.34191	1.34191	1.73779	1.34001	1.20959	0.704122	1.4603	1.56004	2.74417	0.448797	1.26764	2.60058	1.07781	1.81773	1.07279	1.59239	1.35729	2.96165	1.85609	-0.676605	0.470933	1.43021	0.309666	0.287139	1.64177	0.482925	0.101857	2.75452	-0.888441	1.17519	0.867463	1.3932
LINC01580	6.54661e-09	-8.18398	5.1923e-07	1.3014	0.506201	0.540972	-3.24468	-1.44581	-0.906741	0.398109	-0.436539	1.12872	0.808353	-0.411012	-1.50947	0.426153	-2.38543	-2.38543	-2.38543	-0.766046	0.999737	-3.5001	-0.591347	0.0551043	-1.04618	1.13081	-0.64081	-0.215517	-1.5624	-0.298914	1.81773	-0.666856	-1.72321	0.48072	-2.29758	-0.483742	-0.0804082	-1.65887	-0.887194	-1.31484	0.339424	-2.19999	-0.594696	-0.622566	-1.68349	-1.10568	0.490361	-3.44815	-2.37677
KLHL14	6.78209e-09	-8.16864	5.35838e-07	-0.992768	2.71079	3.12088	3.86692	1.47602	4.31749	2.96463	3.71707	1.79823	1.0143	1.86825	3.05325	2.65298	2.83811	2.83811	2.83811	2.30779	0.509359	0.820806	3.06061	2.69635	3.98644	0.726571	4.18095	3.95547	3.13488	0.161263	2.22771	3.91203	2.72029	0.655276	2.29331	-0.751289	1.5194	4.03515	3.07066	2.4283	2.59425	1.90748	0.350508	3.62467	1.49506	2.75917	3.7172	3.35544	2.90588
TXNDC5	6.93222e-09	-8.15913	5.45601e-07	-1.03068	1.21346	1.10953	1.99251	0.766836	3.34625	1.28679	1.94181	0.644569	2.34066	-1.31931	2.00868	1.54363	1.43957	1.43957	1.43957	0.991727	-0.485548	-0.0787175	1.27444	2.4473	1.67366	-0.0488636	2.1665	2.58572	-0.0366934	0.0592382	0.810016	2.14587	1.23655	0.384825	0.482599	-0.366533	0.83041	1.84841	0.331966	0.99184	-0.0739705	0.295516	-0.206797	1.06829	0.442764	0.806048	0.683114	1.19494	0.699859
RABGAP1L-IT1	7.29236e-09	-8.13713	5.71754e-07	0.834232	1.19954	0.0320472	-0.711284	0.595407	-0.68642	1.89074	0.615307	0.800231	0.478119	1.27566	-0.614575	-1.10352	0.720004	0.720004	0.720004	0.0270995	1.79175	1.51554	0.082255	-0.603121	0.153701	0.511333	-0.0435887	0.0766166	1.37549	0.852335	-0.205534	-0.475558	0.964004	0.112839	0.442277	0.899231	-0.290306	0.82204	0.775885	0.408792	0.778698	0.138963	0.303523	1.01888	2.30799	0.414775	0.267824	0.651562	1.78156
TMEM106C	7.32106e-09	-8.13543	5.71822e-07	-0.409363	3.1246	2.37439	3.63233	2.57509	3.74224	3.1265	3.49684	3.05082	2.73933	2.94329	3.26438	3.04917	3.53913	3.53913	3.53913	3.13353	2.14974	4.04931	3.56729	3.94728	3.72166	2.62409	3.4682	3.71334	2.80546	2.58609	2.96699	3.37981	3.66384	3.02252	2.87342	3.06024	3.63312	3.36236	3.10275	3.16234	3.1203	3.20487	3.14959	2.89292	2.492	2.71007	2.42511	2.77692	3.55366
TXNDC2	7.57144e-09	-8.12082	5.89138e-07	-1.29816	0.495527	-0.217125	-0.85039	-0.300624	-1.03096	-0.449386	-0.189656	0.90686	6.57521	-2.15173	-0.407843	-0.5218	-0.149546	-0.149546	-0.149546	0.0270995	0.317442	-0.845121	-1.03448	-0.372374	-1.19784	0.34764	0.223509	-0.281778	-1.83269	-0.978629	1.20067	0.221248	-1.40001	0.334376	-0.0967741	0.108709	1.02454	-0.978129	-0.698412	-0.406253	-0.0739705	-1.22435	-0.889987	-1.4458	-1.51973	-0.790973	-0.858901	-0.641476	-1.0622
NASP	7.65625e-09	-8.11598	5.93489e-07	0.448176	5.46192	6.02545	5.05924	6.33087	5.26378	5.34652	5.33954	4.92679	5.01324	5.26275	4.95851	4.70453	5.08722	5.08722	5.08722	4.53009	5.47739	5.71737	4.94745	4.36738	5.23801	5.79964	4.91687	4.8774	5.52652	4.57717	5.11853	5.0407	5.17895	4.81443	4.63298	5.83141	6.18944	5.29677	4.98042	5.24286	5.35224	4.60928	5.67922	5.30058	5.15238	5.24055	4.22296	5.40736	4.98823
HMGB3	7.72761e-09	-8.11195	5.95135e-07	-0.722608	0.865535	0.540972	0.4229	0.329661	2.03478	0.0357182	1.15149	1.55758	1.19449	-1.31931	0.209464	1.6537	1.23716	1.23716	1.23716	1.48366	0.509359	2.37864	1.3755	1.53799	0.717166	0.854068	0.643609	1.37905	0.402678	0.256548	1.36238	2.13124	0.627694	0.951492	-0.0967741	0.586817	0.777501	0.161792	0.607178	1.49885	0.778698	0.894043	1.09286	0.101857	-0.196457	0.0959823	0.383379	0.932802	0.470627
TXNDC11	7.73542e-09	-8.11152	5.95135e-07	-0.463963	5.87772	5.77788	6.58827	5.74806	7.35448	5.99796	5.95351	5.51379	6.35136	5.44398	6.3533	5.92133	6.0672	6.0672	6.0672	5.79525	5.31981	5.87533	5.8298	6.28465	5.88974	5.18734	6.65375	6.2636	5.68253	5.21254	5.18221	6.62095	6.33254	5.23801	5.44134	5.18202	6.07489	6.2481	5.73809	5.92673	5.57029	5.64104	5.30434	5.90335	5.68776	5.82488	5.54027	5.88696	5.7169
PAXBP1-AS1	8.02362e-09	-8.09563	6.15005e-07	0.358511	3.32908	3.27385	2.07171	3.39703	3.17407	3.05208	3.55301	3.67124	3.50275	3.57386	3.04448	2.27998	3.3309	3.3309	3.3309	2.62998	3.47069	3.47158	2.56796	2.63579	2.97771	2.91475	2.74969	3.19135	3.70759	2.94193	2.84912	2.94212	3.24104	3.09249	2.69616	3.06024	3.0768	3.05945	2.78447	2.86352	2.70799	3.1783	3.10918	3.45392	3.45644	2.791	3.18358	3.28212	3.1581
ABTB2	8.69132e-09	-8.06091	6.63706e-07	0.967572	3.78619	4.08496	2.41324	3.93548	2.16788	4.17791	2.89288	3.41234	4.00743	3.73957	2.77435	2.92295	3.12906	3.12906	3.12906	1.93359	3.56556	3.31067	2.7671	2.81033	2.42349	4.46871	2.3452	1.68686	3.62206	3.70365	3.2095	2.61412	2.53708	2.33052	2.4129	5.47685	3.38161	2.86897	2.33285	3.21807	2.91166	2.15922	2.79781	2.8082	4.88092	2.98924	1.87336	2.4033	3.58842
ZMYND15	1.03199e-08	-7.98632	7.85153e-07	0.67305	2.2148	3.66057	1.33319	2.32363	1.72489	1.37083	1.59188	2.48934	1.89599	0.921469	1.97214	1.05883	1.23716	1.23716	1.23716	2.30779	1.73525	1.16006	0.886408	2.28778	0.536715	2.18891	1.75322	1.33552	0.739012	2.34724	2.61239	2.68596	1.22094	2.44193	1.49681	1.97191	1.02454	1.25032	1.3034	2.00584	2.09844	2.13178	1.24981	0.967712	1.6579	1.87736	1.61421	1.89776	1.76139
SLC1A3	1.03694e-08	-7.98424	7.86011e-07	1.36282	3.92618	5.87809	2.44333	3.70886	1.9387	1.9096	1.71819	3.51705	2.73933	2.52584	1.68667	3.0572	2.1196	2.1196	2.1196	1.97371	3.76688	2.19411	2.81286	1.94689	1.73777	6.15575	1.31215	1.04245	1.90746	3.44508	2.59622	2.80135	1.82695	3.38668	0.560012	2.84623	2.47405	1.46511	0.0972919	3.47983	2.3863	0.683432	0.604204	1.70574	1.87951	3.44434	0.637286	0.99531	2.05446
SIDT2	1.04713e-08	-7.98	7.90815e-07	0.523617	6.61042	7.02969	6.17376	6.43414	5.67628	7.10612	6.13007	6.71179	6.3242	6.87914	5.53412	5.54075	7.10885	7.10885	7.10885	6.45789	6.72892	5.94461	5.63717	6.04041	5.9417	6.52735	5.37351	6.45948	6.76782	5.88058	5.87939	6.00794	7.27492	6.08135	5.89228	5.67955	5.17387	6.0503	6.17157	5.64223	6.20581	6.72481	6.0352	6.06803	8.16613	6.0594	5.71727	6.02539	6.94132
EXO1	1.07227e-08	-7.9697	8.06833e-07	-0.716044	1.0535	-0.217125	1.62341	0.329661	2.12487	0.102796	1.74811	2.33238	1.30321	0.198349	1.66394	1.58867	1.07641	1.07641	1.07641	1.06784	0.210975	3.26455	1.01728	2.00276	1.12133	0.431807	1.58944	1.81919	0.270551	0.509613	1.54194	1.66686	1.38397	0.655276	0.221803	0.586817	1.45347	0.97001	1.40983	0.99184	1.14466	1.0191	2.13093	1.01888	-0.395134	0.569606	0.20638	0.867463	1.28434
SPTLC2	1.09498e-08	-7.96059	8.20915e-07	0.772722	8.80803	10.2066	8.66278	8.51272	7.55549	8.91668	7.22375	7.64078	8.76668	8.90958	7.5505	7.63964	7.80388	7.80388	7.80388	7.67501	9.63876	8.58203	7.92108	7.09754	7.81955	8.63115	7.5819	6.90054	7.18805	8.02715	7.55631	8.41718	8.34105	8.56953	7.4752	9.26806	9.69822	7.16174	7.53673	8.28571	7.90734	7.59013	7.82991	7.52975	8.72483	8.70102	7.39854	7.60775	8.14526
AL135905.2	1.10586e-08	-7.9563	8.24133e-07	0.695953	1.66248	0.874507	1.88697	0.0923187	0.406468	2.10222	0.615307	0.60288	1.9303	1.90255	1.00834	1.79493	1.02699	1.02699	1.02699	0.639352	2.48283	0.788576	0.953328	1.09942	1.62928	2.11446	1.23362	0.406176	1.63931	1.6689	1.81773	0.910907	1.07233	0.171493	0.221803	2.29021	1.45347	1.34011	1.38916	1.6279	1.59528	0.34414	0.885168	0.802331	1.60563	1.18714	0.637286	0.763547	0.821732
GFPT1	1.1073e-08	-7.95574	8.24133e-07	-0.313683	4.60953	4.32178	5.04949	4.40234	5.47405	4.61991	4.66424	4.43892	4.59359	4.69103	4.84692	4.74239	4.99706	4.99706	4.99706	4.60226	4.30228	4.91157	4.82994	4.47005	4.64566	4.2942	4.77504	4.47513	4.51352	4.61811	4.34763	4.99699	4.74117	4.21919	4.65299	4.44074	4.63397	5.21755	4.79646	4.70101	4.63067	4.50889	4.38724	4.53217	4.97491	4.92089	4.42528	4.65515	4.3559
AC006254.1	1.17379e-08	-7.93041	8.70467e-07	0.511279	2.45409	2.78976	1.93012	3.2312	1.64595	3.04357	1.67211	2.19884	2.57557	1.40092	0.895806	1.47332	2.21095	2.21095	2.21095	1.78365	1.20783	2.61754	1.22112	1.49967	2.02148	1.95293	1.52495	1.77098	2.97425	2.03419	1.01853	1.94301	2.90741	2.53422	2.35976	2.41005	3.04357	2.52096	2.25503	1.68834	1.93815	1.47712	2.86408	2.12312	2.26371	2.37415	1.95034	1.68669	2.65571
LINC02798	1.1938e-08	-7.92307	8.82126e-07	0.958188	0.824611	0.308835	-0.359931	-0.842386	-0.587713	1.28679	0.443073	1.81658	0.168915	0.403888	0.0781061	0.0926117	-0.396869	-0.396869	-0.396869	0.303844	0.75648	-0.269115	0.353986	0.936838	0.799578	0.258256	-0.198307	1.04245	0.523713	-0.298914	1.50777	-0.085489	-0.13399	1.52413	-0.967205	0.586817	0.0140993	-1.34715	0.807382	-0.324352	0.700897	-0.468967	-0.206797	0.648373	0.557266	-0.0656384	0.0750347	-0.739872	0.313282
MIR4729	1.20934e-08	-7.91745	8.904e-07	0.539113	-0.273313	0.10638	-0.85039	-0.686718	-0.68642	-1.03378	-0.819805	-0.776747	-0.769094	-0.108146	-1.50947	-0.727252	-0.780988	-0.780988	-0.780988	-0.523337	-0.57798	0.141424	-1.03448	-1.66299	-0.561641	-1.49355	-0.972001	-0.351229	-0.544436	-0.978629	-0.925651	-1.01184	-0.604294	0.613577	-0.220784	-1.77866	-0.832372	-1.34715	-0.312556	-1.16474	-1.0009	0.0827615	-0.0767838	-0.546208	0.182261	-2.0701	0.20638	-0.462784	-0.57818
TOB1	1.33231e-08	-7.8754	9.77436e-07	0.493834	6.03526	6.20533	5.77133	5.38976	5.6411	5.75505	5.14942	4.98475	6.53953	5.92164	5.56051	6.24258	5.62242	5.62242	5.62242	5.78683	6.02006	5.59924	5.73789	5.72873	5.37198	6.08278	5.73684	5.14035	5.1711	5.74544	5.76832	5.82002	5.54288	6.28931	5.53299	5.93066	6.9288	5.72947	5.58521	5.94851	5.76206	5.55587	5.81104	5.47904	5.50486	5.81524	5.35803	5.4938	5.2072
SPAG5	1.34292e-08	-7.87195	9.81717e-07	-0.678036	1.9189	1.07292	2.05231	2.32363	3.35247	1.73031	2.48548	2.72133	2.23483	0.743676	2.30152	2.63162	1.90385	1.90385	1.90385	1.66614	0.86579	3.76453	2.27281	2.81033	1.27327	0.258256	2.27831	2.40796	0.739012	1.52322	2.30932	2.80135	2.45274	1.25252	1.51636	1.47141	1.88718	2.49187	2.13604	2.34314	1.75779	1.31582	2.03351	1.31341	0.729965	2.00498	1.41133	1.76053	1.41918
TEP1	1.36293e-08	-7.86553	9.92815e-07	0.358732	7.18276	8.05457	6.96083	7.77328	6.75414	7.68665	6.56881	6.92978	6.13306	7.17542	6.415	6.88225	6.82739	6.82739	6.82739	7.0119	7.33362	7.0417	6.56203	6.65856	6.59243	6.61096	6.59558	6.59027	7.20907	7.02742	6.43299	6.89874	7.67082	7.16397	7.50272	7.08152	7.43513	6.76926	6.56503	6.82321	7.28122	7.02894	6.8508	6.41399	7.58044	6.72528	6.62784	7.19345	7.28515
SHCBP1	1.38186e-08	-7.85954	1.00114e-06	-0.77285	1.83376	1.37309	1.88697	1.22465	3.38929	1.22791	2.85213	2.69181	1.54381	-0.411012	2.67556	2.64234	2.42639	2.42639	2.42639	1.99336	1.17988	3.17389	1.46995	2.84895	1.65164	0.0609361	2.39115	2.27599	0.580624	0.0592382	2.59622	2.85576	2.07279	1.22509	1.14143	1.19455	1.88718	1.9374	1.43021	2.2257	1.55163	1.80699	1.8495	1.46869	0.557266	1.99134	1.38384	1.3465	1.1039
BNIP3L	1.38411e-08	-7.85883	1.00114e-06	0.913944	9.01409	7.75685	7.45987	7.84002	6.90796	7.55922	7.37793	6.92767	6.69354	9.04302	6.63691	9.16496	7.72182	7.72182	7.72182	9.83589	8.14135	7.68168	8.80696	9.66181	8.62156	9.01095	7.39411	8.4133	8.59826	8.38439	8.21862	8.20412	9.07772	9.12505	10.0183	8.79733	8.46373	7.42514	6.55404	7.42952	7.57735	9.52394	8.31799	6.44997	9.62817	7.14721	9.76527	7.29246	8.96548
TPX2	1.40015e-08	-7.85383	1.00919e-06	-0.738837	3.21693	2.32855	4.05408	3.11961	4.47422	3.24259	3.60708	3.66112	3.21338	1.86825	3.31631	3.91383	3.46684	3.46684	3.46684	3.33179	1.31453	5.70663	3.6901	3.92214	2.89578	1.98114	3.52288	3.30294	2.34537	1.5979	3.43534	3.89481	4.11173	2.70278	2.9545	2.94023	3.64793	3.13038	3.17093	3.3107	3.48769	3.1375	3.51185	2.61389	1.53286	2.96153	2.25347	3.0218	3.4938
CHST8	1.43106e-08	-7.84434	1.02786e-06	-0.855291	0.910129	-1.41995	-0.259559	1.44268	1.49648	1.34336	2.31603	2.72133	1.30321	0.705329	1.66394	2.10501	0.867678	0.867678	0.867678	0.781763	1.15138	0.141424	1.57992	1.31338	1.58349	1.22818	1.88752	2.24102	-0.811046	-2.30715	2.47765	2.27127	-0.446448	1.93296	-0.587399	0.527476	2.31607	-0.108229	1.63718	1.82024	2.24269	-0.745959	-0.140326	0.54744	-0.135879	1.18714	0.637286	1.22133	0.00561075
IRF5	1.49177e-08	-7.8263	1.06773e-06	0.520434	6.45528	7.02491	6.54034	5.67098	5.65754	6.93607	5.81637	6.05492	6.44481	6.96178	5.91829	5.37066	6.50528	6.50528	6.50528	5.58792	6.87609	6.1216	6.10556	5.65218	5.6498	6.00935	5.54185	6.12342	6.45806	5.46532	5.95266	6.19543	6.27845	5.62135	5.74467	6.93151	6.40207	5.96819	5.47553	6.03057	6.5551	6.14076	5.80894	5.74143	7.22059	5.87679	6.21524	6.14049	6.56662
PARM1	1.57535e-08	-7.80262	1.12364e-06	-0.972932	1.82982	1.43208	2.9629	1.30105	3.94545	2.01784	2.52058	1.51326	2.02859	0.781031	2.74217	2.37303	2.23291	2.23291	2.23291	2.47087	0.154643	0.376413	2.21943	3.03463	2.62903	1.07955	3.51044	2.7356	2.4711	-2.30715	1.06627	2.7639	1.86761	0.570636	2.4129	-0.751289	1.48681	1.96589	1.40983	1.76518	1.98813	1.58221	-0.140326	2.14632	0.99669	2.04513	0.89267	2.80337	1.28434
NDFIP2	1.59183e-08	-7.7981	1.13147e-06	-0.627411	1.08783	-1.05335	1.48558	0.400825	1.5188	0.550049	1.52431	1.79823	-0.0815063	0.625433	1.38701	1.73609	2.09583	2.09583	2.09583	0.952108	0.367867	1.76782	1.75893	1.48012	0.951495	0.586704	1.6662	2.49958	1.52797	1.56105	1.63985	1.37557	1.65179	0.282099	0.123226	1.2689	-0.290306	1.86362	1.72226	1.14346	0.700897	0.245196	2.308	0.967712	0.762156	1.70429	0.20638	0.763547	1.16658
ABCD1	1.59885e-08	-7.79619	1.13254e-06	0.445865	5.48837	6.10352	5.41484	5.2498	4.89274	5.91873	4.96266	4.87956	6.18372	5.43375	5.21258	5.24792	5.09773	5.09773	5.09773	5.17553	5.53645	5.40166	4.77781	4.75265	4.79124	5.32301	4.70582	4.76497	5.34748	5.09177	5.1686	5.11322	5.06666	5.09949	4.78783	5.74776	5.86744	5.06625	5.00779	5.24454	5.45801	4.88051	4.78371	4.98072	5.60254	5.25774	4.84622	5.43722	5.02041
TENT5A	1.66038e-08	-7.77979	1.17208e-06	0.697236	6.64018	6.80191	6.60833	5.82608	5.17343	7.22615	5.46646	5.43282	6.21014	7.33542	5.40131	5.21238	6.54751	6.54751	6.54751	5.34571	6.99766	6.54525	5.99773	4.68809	6.20624	6.61547	5.71894	5.4418	6.88118	5.64115	5.67325	6.09533	5.98416	5.11452	5.78351	7.40528	6.67042	6.08074	5.69769	5.68859	6.66993	5.62883	5.84117	5.96987	7.80395	5.63297	5.68666	5.89621	6.52236
CNKSR1	1.71386e-08	-7.76602	1.20569e-06	-0.70506	0.974805	-0.518506	1.7731	0.175847	2.74282	1.22791	1.55849	2.35767	1.19449	-0.251646	1.75277	1.05883	0.720004	0.720004	0.720004	0.952108	0.0349158	0.615653	1.62166	2.06969	1.27327	-0.29724	1.91294	1.81919	0.0464664	-0.169397	2.00084	1.6257	1.43896	0.282099	0.442277	0.80242	0.411399	1.7205	0.926914	0.501542	0.816079	0.565349	0.852897	1.43141	0.48195	1.30205	0.326758	0.799024	0.897613
AK3	1.7215e-08	-7.76409	1.20693e-06	-0.320492	4.2525	3.53162	4.61631	4.0506	4.61299	4.50991	4.47591	4.15867	4.27106	4.46296	4.5419	4.0286	4.67489	4.67489	4.67489	4.43988	3.69463	4.90219	4.60127	4.14645	4.40694	3.81918	4.17833	4.44983	4.37961	4.45693	3.19883	3.94168	4.63182	3.71219	4.04721	3.90677	3.91615	4.66066	4.58329	4.51885	4.23827	3.93346	4.73806	4.62178	4.44082	4.32357	4.02809	4.18098	4.64171
AC136475.2	1.76175e-08	-7.75406	1.22926e-06	0.680272	0.533627	1.37309	-0.711284	0.329661	0.1446	0.287128	-0.134015	-1.01559	1.24988	-0.688887	-0.314619	0.426153	-0.0938156	-0.0938156	-0.0938156	-0.31564	0.367867	0.141424	-0.252818	-0.30299	0.799578	1.18031	-0.881807	-0.857389	0.199655	-0.441216	0.188828	-1.01184	-0.0944039	0.695804	-0.220784	0.698642	1.55127	0.548323	-0.312556	-0.406253	0.618661	0.0242815	0.204697	0.0535989	0.0319427	0.414775	-0.230091	-1.08314	-0.799986
DRAM2	1.7675e-08	-7.75264	1.22926e-06	0.338733	5.62677	6.11819	5.39573	5.77342	5.37197	5.4881	5.48657	4.80339	5.73241	5.73557	5.2378	4.83642	5.7033	5.7033	5.7033	4.8514	5.59715	5.40697	5.2828	4.52594	5.40361	5.71609	4.96931	5.05568	5.67438	5.37265	5.36748	5.13172	5.23635	5.07857	5.01788	5.74125	5.82895	5.35985	5.16042	5.15814	5.13464	5.31338	5.16014	5.12781	5.6592	5.22461	5.23459	5.44983	5.52538
NINJ2	1.77131e-08	-7.75171	1.22926e-06	0.602749	4.5496	4.17407	3.99942	4.65247	4.22886	3.64828	2.52922	2.31957	4.27774	4.54396	4.0224	4.01629	3.72105	3.72105	3.72105	5.74542	3.39975	3.38261	4.11598	4.84916	3.87682	4.6942	3.69761	3.99098	4.08238	4.44181	4.54587	4.20534	3.26406	3.96937	5.21474	4.90439	4.21865	3.5481	3.45568	3.89754	3.88949	5.06588	3.71851	2.89292	4.04252	4.16256	5.42868	3.9281	3.50597
SSR4	1.78483e-08	-7.7484	1.23448e-06	-0.379144	5.37758	5.41446	5.84786	5.30418	5.95841	5.44674	5.87008	4.91619	5.25237	5.007	5.54349	5.52345	5.7033	5.7033	5.7033	5.39825	4.32159	5.35565	5.80057	6.08962	5.95973	5.10321	5.89431	6.15586	5.17803	4.82268	4.69756	5.72456	5.72331	4.74612	5.3228	4.9304	4.84153	5.44579	5.08692	5.16347	5.12163	5.37318	4.97763	5.24526	5.37297	5.07589	5.31502	5.20569	5.50278
MIF	1.8285e-08	-7.73791	1.26044e-06	-0.469422	3.09414	3.2819	3.67734	3.48153	3.48878	3.06896	4.09724	3.18401	3.59119	2.84088	3.74769	3.67368	3.67767	3.67767	3.67767	3.17714	1.61514	3.76453	3.8168	3.76945	3.72694	2.43309	3.65682	4.18745	2.87537	2.60432	2.47765	3.04718	3.29047	2.2237	2.68757	2.84623	2.67546	3.23356	2.99744	2.97285	2.87671	2.7434	3.20177	2.99866	2.7465	2.95452	2.55403	2.72253	3.28361
CARS2	1.86471e-08	-7.72939	1.2811e-06	0.396897	6.67029	7.05102	5.74288	7.41182	6.26367	6.87082	6.45378	5.65562	6.50723	6.53075	6.04242	6.43753	6.34185	6.34185	6.34185	6.361	6.65534	6.4887	6.16058	6.43691	6.17667	7.23867	6.18323	5.64606	6.68265	6.36379	6.4877	6.45243	6.36441	6.02779	6.28177	6.6763	6.98894	6.15838	6.23665	6.69221	6.15475	6.23965	6.95043	6.14706	6.29445	6.42663	5.97272	6.10461	6.41349
ITPKC	1.88175e-08	-7.72544	1.2885e-06	0.724035	3.9255	5.34899	3.092	4.03949	2.96233	3.18184	3.08684	3.0815	4.99714	3.50855	3.62362	3.79395	3.02592	3.02592	3.02592	3.50607	4.56795	2.69783	3.03767	3.40492	2.77876	3.32008	3.05958	2.87897	3.18162	3.0786	3.28205	3.44634	3.27544	4.59896	2.75496	3.39506	4.96792	3.01243	2.92032	3.46838	3.35429	2.8313	2.56864	2.86523	2.9902	3.46915	2.9411	3.58109	2.58862
SRGAP1	1.89213e-08	-7.72305	1.28914e-06	1.04968	2.73377	4.92751	1.56985	0.819733	0.307349	1.73031	2.67654	4.49981	2.85101	2.12222	1.5446	0.567857	1.69823	1.69823	1.69823	2.2436	4.07832	-0.139434	1.3755	2.28778	1.65164	2.58786	1.38663	2.27599	0.688124	1.27275	3.48008	1.9091	0.886988	3.78444	1.28515	1.88001	2.60128	0.389154	0.775885	1.28065	2.11353	0.193057	1.3687	1.75184	1.12601	0.89661	2.50384	1.48364	1.19694
MYDGF	1.90023e-08	-7.72119	1.28914e-06	-0.487281	2.51172	2.75552	3.42927	2.06343	3.66927	2.18193	3.03922	2.82469	3.26806	2.2476	2.78493	2.81337	2.86648	2.86648	2.86648	2.61737	1.69631	2.34579	2.51356	3.42039	2.57156	2.23649	2.97762	3.43773	2.51557	2.1127	2.16331	2.81972	2.69226	1.59012	2.37055	1.85609	1.83635	2.88398	2.09833	2.75467	2.32279	2.41959	2.19669	2.57168	2.4131	2.62433	2.31298	1.77841	2.41874
HCLS1	1.90152e-08	-7.7209	1.28914e-06	0.445532	8.53	9.30396	8.11635	8.79103	8.32229	8.12817	7.62092	6.8908	8.37931	8.11885	7.943	8.47602	8.0087	8.0087	8.0087	8.47836	8.58108	7.94854	7.78762	8.19589	7.51792	8.78508	7.84532	7.37757	7.66102	8.79426	8.07213	8.45457	7.50052	8.92397	8.31026	8.4212	8.93668	7.98962	7.85647	8.29039	8.25804	8.58141	8.20488	7.60911	7.83667	8.36965	8.4247	8.30308	7.8571
GCNT1P3	1.95992e-08	-7.70776	1.32437e-06	0.839446	1.63061	1.67125	1.01029	1.82552	1.05206	-0.268947	-0.134015	-0.159445	0.38223	0.852958	1.00834	0.567857	0.867678	0.867678	0.867678	1.17498	2.16408	-0.202818	0.082255	1.02042	0.330423	3.06727	-0.499953	-0.0332443	0.580624	2.32543	-0.593457	0.876229	-0.549737	3.11508	1.41583	1.03326	2.50692	0.82204	-0.698412	1.08471	0.989706	2.0462	1.09286	-0.0480481	0.402484	0.494266	1.63768	0.443126	0.256774
CD163	2.00028e-08	-7.69891	1.3472e-06	1.25063	6.71366	9.15596	4.43722	4.08342	4.24903	5.74327	3.99489	6.55461	6.9024	5.50525	4.47819	4.241	5.29068	5.29068	5.29068	4.37019	7.6056	4.23117	4.35129	4.04698	3.71106	6.56628	2.8714	3.51294	4.45003	4.92775	4.35726	4.78902	5.36794	7.72464	4.94399	5.46306	5.97268	4.52126	3.45071	4.86928	4.73925	5.38194	3.46991	4.36675	5.38981	5.52591	5.98877	4.89125	5.0908
BMP8B	2.07131e-08	-7.68375	1.39049e-06	-0.636654	2.34879	2.0559	3.27884	1.3736	3.54425	2.38422	2.99623	3.16981	2.85101	1.24925	3.03565	3.0572	3.1173	3.1173	3.1173	2.82902	1.8638	1.98248	2.83077	2.87163	2.53594	1.98114	3.03084	2.38679	1.09207	1.31764	2.91579	2.5822	2.52442	1.91591	2.1252	1.0753	1.88718	2.70965	2.52508	1.83813	2.06778	2.00143	1.41364	1.70574	2.46291	2.50465	2.59056	2.4033	2.2553
PDIA5	2.0898e-08	-7.67989	1.39833e-06	-0.472045	2.15946	1.95892	2.48733	1.63205	3.43109	1.68724	2.33588	2.73104	2.36595	1.7971	2.22596	2.62082	2.43588	2.43588	2.43588	2.1239	2.13526	2.4525	2.47991	2.60904	2.16828	1.95293	2.39115	2.71026	1.69192	0.852335	2.62838	2.71568	2.38434	1.67365	1.89062	1.67654	1.48681	2.21168	1.6546	2.25264	1.83266	2.25133	1.06496	2.16915	2.08436	2.66783	2.09298	1.96177	2.10335
PTTG1	2.13314e-08	-7.67098	1.42269e-06	-0.650424	1.98587	0.486345	2.12838	2.01889	3.03384	1.3978	2.59656	1.92205	2.20711	0.496627	2.21036	2.47251	2.28639	2.28639	2.28639	1.64144	0.999737	3.80939	3.03767	2.81814	2.62903	0.258256	2.57756	2.78499	1.9938	1.56105	2.07273	2.42313	2.41209	0.773596	1.28515	1.78186	1.61297	2.25849	1.96503	1.76518	1.55163	1.62219	2.59814	1.43141	0.884184	1.03595	1.66077	1.22133	2.41874
TRAM2	2.20486e-08	-7.65662	1.46577e-06	-0.454715	4.96954	4.60745	5.6231	4.54661	6.28581	5.08349	5.18678	4.47403	5.02519	4.73214	5.25501	5.29793	5.44446	5.44446	5.44446	5.05213	4.41748	4.65423	4.68979	5.01117	4.70833	4.22511	5.42963	5.23521	4.61917	4.22922	4.54165	5.54026	5.59904	4.37081	5.06179	4.12765	4.8383	5.24686	4.83899	4.98624	5.09146	5.03103	4.4667	4.90964	5.08399	4.90825	4.98533	5.06159	5.0908
TESC	2.29093e-08	-7.63999	1.51808e-06	0.704642	4.55555	3.24946	4.00448	3.68054	3.36485	2.99143	3.49684	3.10409	3.899	4.65878	3.39432	4.28613	4.01838	4.01838	4.01838	5.63403	3.76217	3.51655	4.42387	5.26786	4.29065	4.87795	3.14788	4.14078	3.83	4.90954	4.45912	3.4225	4.38812	4.69954	5.11726	4.05071	2.99805	3.71683	2.72799	3.93544	2.81342	4.69847	3.72298	2.52819	4.7506	3.4343	5.31865	3.31925	4.42804
C5	2.30501e-08	-7.63733	1.52249e-06	0.779309	3.848	4.8485	2.5017	3.98842	3.33999	4.30797	2.96472	3.99104	3.22724	3.83146	2.87673	2.46044	3.26316	3.26316	3.26316	3.73342	4.06692	3.39337	3.04536	2.40646	3.18355	2.60609	3.09332	1.96918	3.64892	1.89305	3.67743	3.33583	3.61989	3.21606	2.71321	4.8479	5.35632	2.89883	3.17093	3.02847	3.84949	2.8313	3.80117	3.16689	3.74118	2.93329	3.03245	3.2946	3.60549
PCTP	2.50524e-08	-7.60115	1.64595e-06	0.482095	5.09144	5.32195	4.65218	5.1108	4.33647	4.62277	4.16536	3.91216	4.76972	4.97512	4.36298	5.21058	4.48207	4.48207	4.48207	5.18837	5.62463	4.36833	4.79843	4.87932	4.60899	5.45206	4.72209	5.306	4.38362	5.0591	4.81749	5.10201	4.55611	4.96295	4.90001	4.81105	5.41596	4.23563	3.97575	4.57061	4.77765	5.06769	4.73806	3.86733	4.52999	4.71231	5.22106	4.30337	4.56233
LINC02009	2.50794e-08	-7.60068	1.64595e-06	-1.17321	1.8909	0.177069	0.00542681	0.711926	2.46092	1.37083	3.42919	0.42292	0.732608	-0.178113	0.54413	2.436	2.07166	2.07166	2.07166	2.39902	0.210975	3.52635	2.83077	2.28778	1.5362	0.258256	-0.499953	2.71026	0.788166	1.40342	1.67106	3.35484	1.6401	1.54646	2.63487	0.851638	1.38438	-0.108229	1.06362	2.55273	0.287139	1.80699	0.152624	-0.622566	-0.544624	1.00914	-0.996625	0.145302	3.32543
E2F7	2.64126e-08	-7.57819	1.72793e-06	-0.749648	1.34281	-0.217125	2.07171	0.00365547	2.78026	-0.0346308	1.77742	2.43098	1.99657	-0.590195	1.5446	1.49714	1.54866	1.54866	1.54866	0.365464	0.638204	3.55058	1.27444	1.98899	1.89598	-0.97702	1.84853	2.27599	0.635375	0.0592382	2.30932	1.95966	1.79569	0.695804	0.560012	0.333234	1.19562	1.22697	1.13983	1.11438	1.28458	1.45515	2.04784	0.88739	0.0319427	0.569606	0.770621	0.689864	1.65609
AL160272.1	2.66161e-08	-7.57486	1.73571e-06	0.625389	3.82832	3.74443	2.28616	4.03949	2.86112	3.47556	2.79594	3.06624	4.22343	2.83201	3.12156	2.8783	3.00693	3.00693	3.00693	3.80744	3.83119	3.0838	2.65094	3.5002	2.98653	4.02287	2.81183	2.76051	2.9636	4.77117	3.50628	3.79159	3.18181	3.60456	2.9899	4.09736	3.79494	2.80734	2.9131	3.31709	2.99552	3.961	3.16281	2.86523	3.22196	3.31348	4.11843	3.47542	3.66098
TOX2	2.75086e-08	-7.56053	1.78694e-06	-0.625471	0.948824	0.0320472	1.7249	1.40856	1.58378	-0.356347	1.32034	2.2936	1.96381	-0.178113	1.4145	1.92355	1.02699	1.02699	1.02699	1.14014	0.900461	1.49571	0.779822	2.29899	0.877535	0.258256	0.944114	1.29062	0.125093	-0.298914	2.00084	0.910907	0.0538967	1.65322	2.04669	1.37371	1.67214	0.30246	0.456392	0.892578	0.618661	1.18845	0.977862	0.361739	0.182261	0.641205	0.683114	0.651562	0.566733
BRCA2	2.75757e-08	-7.55947	1.78694e-06	0.73241	4.64855	4.50125	3.92139	4.24201	3.82967	4.92107	4.1598	4.18009	4.28439	5.33987	3.93018	3.38541	4.46129	4.46129	4.46129	3.45028	5.19967	5.42805	3.73833	3.44076	4.57137	4.10848	3.74084	3.4883	5.27389	3.11719	3.69272	3.89913	4.33836	3.56682	3.09117	4.51518	4.96497	4.3589	3.90108	3.57894	4.16772	3.19164	4.30614	4.37659	4.93663	3.70043	3.07604	3.71248	4.30106
IGKV1D-12	2.78009e-08	-7.55594	1.78982e-06	-1.37105	0.0469262	-1.22503	-0.0776089	-0.546222	0.890229	-0.108587	0.739669	-2.45056	-0.225162	-2.86564	0.640406	-1.42302	-0.267914	-0.267914	-0.267914	0.172097	-4.34055	-0.411615	1.07852	1.71568	0.674125	-0.29724	2.90346	1.31324	-0.124941	-0.441216	-1.12567	1.47162	-1.21883	0.051699	-0.28703	-3.18597	0.0140993	-0.4407	-1.22672	0.309666	0.176517	0.391179	-1.76372	0.321548	-1.51973	0.0959823	-1.1489	1.76053	0.36766
ORC1	2.78857e-08	-7.55462	1.78982e-06	-0.69565	1.76555	0.874507	2.36688	1.3736	3.15994	0.92843	2.07762	2.62048	2.28871	0.252544	2.14621	2.47251	1.71393	1.71393	1.71393	1.42698	0.154643	4.2579	1.77752	2.77867	0.951495	0.658332	1.97461	2.41843	1.16831	-0.298914	2.09591	2.67591	2.2447	0.951492	1.39486	1.30469	1.98376	1.7205	1.6546	1.94108	1.41212	1.38716	2.284	1.27183	0.628845	1.86245	1.38384	1.32232	1.85952
EPB41	2.79296e-08	-7.55394	1.78982e-06	0.870495	9.78678	8.50497	9.04303	9.47292	8.38535	8.46158	7.82839	8.01044	7.70749	10.7592	7.90323	10.065	8.53138	8.53138	8.53138	10.9769	8.6411	9.27571	9.13301	9.95489	8.63547	8.54283	8.20148	8.6232	8.5315	9.28837	8.88104	8.73234	9.29603	10.2283	10.9334	9.35757	8.88622	8.38709	8.26813	8.70669	8.42348	10.1264	8.89076	7.97227	9.98853	8.38472	10.5457	8.66472	9.45242
MSL3	2.79686e-08	-7.55333	1.78982e-06	0.616361	7.82552	7.97093	6.83524	8.13987	6.84585	7.05623	6.98353	5.82836	7.91822	7.18198	6.89593	7.51502	7.01691	7.01691	7.01691	7.70027	8.30396	7.09497	6.90509	7.11547	6.87138	9.04809	6.93424	6.23204	7.26277	8.26199	7.3632	7.59649	6.3653	8.01125	6.61504	7.84612	8.58199	6.78484	6.83426	7.93107	7.05319	7.1107	7.4775	6.50484	6.75862	8.01019	6.55499	7.24662	6.66964
RPL11P3	2.8415e-08	-7.54645	1.81273e-06	0.544903	2.92213	3.4975	2.10974	3.16119	2.44935	2.60851	1.67211	0.470058	2.28871	2.52584	1.5195	3.21634	2.52758	2.52758	2.52758	2.76186	3.63412	2.14404	2.23296	2.59093	2.19897	3.40582	1.73908	1.75454	1.74268	3.53335	2.14119	2.98344	1.53043	3.95692	2.2117	2.48994	3.84722	2.02123	2.03322	2.78266	3.02774	2.4861	2.79781	1.94939	1.70834	3.00967	2.51655	2.30801	2.2553
SGF29	2.91549e-08	-7.53529	1.85418e-06	0.395001	3.86725	4.02873	4.0638	4.40234	3.41332	3.38414	3.36787	3.10409	3.87278	3.97537	3.74769	3.03296	3.51244	3.51244	3.51244	3.52644	3.63412	3.70533	3.82129	2.72984	3.28716	4.99324	3.73016	3.35837	3.7762	3.56161	3.83731	3.17394	3.35266	2.89778	3.41664	4.61477	4.0166	3.59445	3.27598	4.05503	3.64137	3.12364	3.80539	3.30728	3.88699	3.55043	3.24599	3.82001	3.53001
DOC2B	2.95644e-08	-7.52923	1.87442e-06	-0.898662	1.44434	-4.34055	1.9087	0.967696	0.628028	1.25765	0.985565	2.97931	0.732608	-0.497823	1.61738	2.97477	1.76003	1.76003	1.76003	0.535949	0.718122	1.18504	1.6821	1.17433	2.08858	1.36291	1.23362	1.91104	-0.319495	-0.169397	2.82157	0.327747	-0.781556	1.59012	2.48414	1.97191	0.722579	-0.4407	1.32532	2.03717	1.46014	-0.55552	0.0986003	1.25058	1.74101	0.494266	0.727531	-0.959418	0.136651
MCM6	3.00912e-08	-7.52156	1.90195e-06	-0.490374	3.90688	3.32922	4.63273	3.77062	4.61558	3.38414	4.03489	4.2012	3.24098	3.57918	4.15054	4.29635	3.97343	3.97343	3.97343	3.7907	3.16327	5.8325	4.22494	4.24241	4.04674	2.5694	4.19656	4.19356	3.85329	3.50452	3.09908	4.20883	4.43452	3.19501	3.79441	3.31835	3.19247	4.23856	3.85284	4.26142	4.17852	3.76063	4.54705	4.26975	3.47112	3.90336	3.56641	4.39317	4.12283
SLF1	3.03886e-08	-7.51729	1.91486e-06	0.479143	4.64236	4.79892	4.10204	4.26127	4.13803	4.11432	3.63937	3.50012	4.39294	4.37713	3.58785	4.06492	4.22972	4.22972	4.22972	4.42186	4.63124	4.32685	4.08647	3.76138	4.38041	5.18127	4.06667	3.58443	4.33895	5.02229	4.73497	4.29668	3.84273	4.91869	4.21217	4.29267	5.62881	4.04186	3.90473	4.71076	4.12368	4.31517	4.68634	3.92547	4.09401	4.40038	4.04574	4.29408	3.99911
H3C8	3.05608e-08	-7.51484	1.91982e-06	-1.01998	4.19442	2.74392	4.407	3.27921	5.66381	3.19727	5.41376	3.74974	4.10076	1.72225	4.98855	5.13099	4.80336	4.80336	4.80336	4.07056	0.678717	6.34442	4.70686	5.65763	5.48681	2.90005	4.87058	5.41852	3.19079	2.03419	3.52348	5.42503	4.51191	2.86262	3.25144	3.75335	4.1784	4.21798	3.15265	3.99647	3.64137	3.96877	4.76432	3.43049	1.72477	3.80935	2.91253	3.78946	4.76585
H3C12	3.10733e-08	-7.50761	1.94606e-06	-0.950083	4.58891	3.1563	4.99466	3.89291	6.09655	3.79747	5.62705	3.88633	4.59894	2.35058	5.29993	5.22492	5.25892	5.25892	5.25892	4.81598	2.22005	6.35409	5.08996	6.01176	5.64702	2.9293	5.6124	6.08532	3.51664	3.26201	4.04218	5.73669	4.73294	3.20206	3.68203	4.12765	4.52985	4.94985	3.56568	4.26473	3.93268	4.69613	4.89288	3.89841	2.5668	4.19564	3.16755	4.25948	4.87547
DPM2	3.11832e-08	-7.50608	1.94634e-06	0.801081	6.05963	5.10569	5.40723	5.05122	4.06025	4.85451	4.54785	5.08467	3.90764	6.71453	4.53252	6.0943	5.4515	5.4515	5.4515	7.32514	4.76896	5.57936	6.39529	6.36945	5.82972	5.60718	5.10922	5.80515	5.88249	5.59632	5.25353	4.79831	6.10332	6.49851	7.49165	5.21295	4.14746	4.76363	4.34654	4.85836	4.67203	6.58134	5.11323	3.9355	6.27157	4.77732	7.08474	4.89944	6.14625
FOXM1	3.12672e-08	-7.50491	1.94634e-06	-0.786828	2.71054	1.95892	3.48097	2.63535	4.0941	2.22773	3.58238	3.14823	2.26202	1.22234	3.07925	3.56518	3.08144	3.08144	3.08144	2.51232	1.09262	5.03175	3.25219	3.61669	2.47455	1.22818	3.12086	3.28015	1.58471	0.912091	3.04053	3.31656	3.31273	1.93296	2.19966	2.39353	2.87752	2.65821	2.6606	2.94835	2.63666	2.72515	3.48578	2.25701	0.69704	2.3636	1.63768	2.6369	2.9511
GPR146	3.1596e-08	-7.50037	1.96086e-06	1.05455	5.42004	3.35993	3.75738	4.88432	2.28973	3.94186	3.08684	4.39989	3.61247	6.24605	2.55722	5.53213	4.76619	4.76619	4.76619	6.76491	2.67531	5.03347	5.57479	6.22571	5.9451	4.785	3.17964	4.24153	5.41554	4.68815	4.2935	3.55447	5.13278	5.9143	5.90439	5.45512	4.53782	4.16981	2.80021	3.80958	4.10492	5.22201	4.08782	2.58022	5.33468	3.48869	5.73233	3.92007	6.17608
PLAGL1	3.17778e-08	-7.49788	1.9662e-06	0.585858	6.21497	6.7579	5.36462	7.18618	5.74773	4.56149	5.05682	4.94359	5.85133	5.77776	5.44695	5.7448	5.49532	5.49532	5.49532	6.33332	5.49876	6.01855	4.86512	5.99722	5.66774	6.72691	4.39227	5.24112	5.73987	5.86554	5.85411	6.10566	5.10436	6.26847	5.96879	7.029	7.00269	5.13371	5.10446	5.42559	5.61472	6.3457	6.0942	4.68849	5.92218	5.51642	6.51754	6.11521	5.72473
WASF1	3.22524e-08	-7.49144	1.98703e-06	-0.63793	2.30862	2.44771	2.51593	3.33478	2.15369	2.24268	2.07762	2.8868	2.09058	1.22234	2.0266	2.8692	0.867678	0.867678	0.867678	3.36234	2.37601	1.28083	2.92548	3.1689	2.18371	1.92416	2.47888	2.98844	1.52797	1.6689	3.31206	2.52738	2.78008	2.47723	1.49681	1.75624	2.85216	1.78587	2.01984	2.80102	2.36123	2.38515	0.751515	1.82553	1.0235	2.41557	1.5661	3.11624	2.13504
TYMS	3.24482e-08	-7.48881	1.98703e-06	-0.85599	2.49183	1.21408	2.79801	1.97292	3.85621	1.28679	3.08097	2.80644	2.43926	0.496627	2.61761	3.31345	2.44532	2.44532	2.44532	2.2271	0.75648	5.20353	2.93379	3.72447	2.18371	1.40517	2.88431	3.3142	1.24073	1.07781	2.57986	3.31656	2.93636	1.89865	1.99187	2.17891	2.64624	2.17555	2.08555	2.4283	2.2833	2.46427	3.68682	1.97553	0.913144	2.01849	1.23794	2.02306	2.60002
C1QA	3.24689e-08	-7.48853	1.98703e-06	0.901343	2.87052	1.93872	2.39795	1.85116	1.87089	3.11029	2.49434	5.5784	2.23483	2.79597	1.81598	0.426153	2.75707	2.75707	2.75707	1.53819	2.30014	2.15672	1.19371	1.57532	0.839083	2.00881	0.0510457	1.9404	2.40961	1.5979	2.64419	1.49467	3.11584	0.735224	0.268676	2.66535	1.06925	1.20324	2.42711	0.99184	1.83266	1.36377	1.83305	1.57509	1.49506	2.26505	2.22277	0.900503	2.22616
BUB1B	3.25013e-08	-7.4881	1.98703e-06	-0.724757	1.73091	1.37309	2.10974	0.967696	3.14566	1.66522	2.15784	2.65148	1.35465	0.142039	2.11304	2.18051	1.94435	1.94435	1.94435	1.73779	-0.0956537	3.95081	1.81399	2.69635	1.62928	-0.0488636	1.93793	1.77098	0.338127	-0.298914	2.34846	2.63501	2.43932	1.38234	1.14143	0.989952	2.00693	1.80176	1.54676	1.60718	1.67883	1.56179	1.12023	0.711941	0.361047	1.8168	1.04083	1.74242	1.9691
TICRR	3.27793e-08	-7.4844	1.99808e-06	-0.73931	1.57705	0.786813	2.10974	1.14398	2.89565	0.287128	2.68429	2.75026	0.808353	-1.31931	1.70904	2.04163	1.19303	1.19303	1.19303	1.17498	0.830266	3.41464	2.01533	2.36443	1.65164	0.971208	1.71037	2.41843	0.835701	0.656605	2.51253	2.13124	1.87759	1.56845	1.00966	1.40702	1.67214	1.48493	1.61954	1.74635	1.55163	1.64177	2.13093	1.35383	-0.0218575	1.32398	1.17519	1.46167	1.3398
AL133371.2	3.29099e-08	-7.48267	2.0001e-06	0.864371	0.29198	1.2798	-1.17674	-0.300624	-1.48448	-0.548841	-1.22226	-0.670686	-1.65257	-0.590195	-1.14603	-1.61393	0.484021	0.484021	0.484021	-0.31564	-0.165655	-0.338606	-0.330297	-1.35143	-1.55943	0.258256	-0.64081	-0.759719	-0.671591	-0.169397	-0.925651	-0.887454	-0.781556	2.42997	0.482599	-1.08001	-1.4363	-1.21338	0.495591	-0.684198	-0.655652	0.894043	-0.276478	-1.4458	0.402484	-0.613812	1.07561	-0.845473	-0.57818
AP000787.1	3.32665e-08	-7.47799	2.00693e-06	0.675659	2.49197	0.874507	1.67505	1.77284	1.70556	1.52552	1.79186	3.04305	1.9303	2.85846	1.79522	1.61068	1.99663	1.99663	1.99663	3.8185	1.89851	2.10532	2.27281	2.25365	2.16828	1.2745	1.47462	2.52886	2.48608	1.36117	2.07273	0.910907	2.42577	2.29138	3.21001	1.83177	1.27411	1.92295	2.20861	1.58615	1.83266	2.18614	2.15759	1.98842	1.90856	1.46877	2.91253	2.00798	2.43156
MCM10	3.32947e-08	-7.47763	2.00693e-06	-0.724115	1.68015	0.593606	2.3511	1.18488	2.94595	0.643123	2.53781	2.97114	2.15002	0.625433	1.89618	1.90586	1.8901	1.8901	1.8901	1.87123	0.678717	4.06957	1.88427	2.62693	1.46223	1.18031	2.05673	1.91104	0.635375	-0.776423	2.64419	2.28455	2.22918	0.984583	1.1664	1.40702	1.34855	1.42463	1.4503	1.64833	1.98813	1.52008	2.7548	1.13938	-0.625609	1.75359	0.142201	1.62872	1.41918
SFRP2	3.33153e-08	-7.47736	2.00693e-06	1.15291	2.15436	1.9985	-0.0776089	0.0923187	0.0859971	1.10241	-0.654097	1.2686	-4.34055	3.26666	-0.730228	1.79493	1.42056	1.42056	1.42056	2.57887	1.69631	1.70012	1.24803	1.90352	1.48731	2.91475	0.223509	0.958837	2.39382	0.58498	1.95085	-0.568039	2.65791	2.39347	2.11241	2.56564	0.606032	1.36171	0.897946	-0.904551	1.0537	1.45515	1.41364	-2.1464	1.96497	-1.85778	2.88338	-0.549365	3.09504
AC007877.1	3.35824e-08	-7.47389	2.01711e-06	1.13315	3.18322	3.88304	1.23338	3.99993	1.25187	1.25765	-0.189656	1.18631	3.25458	1.19493	1.35898	2.78463	0.109789	0.109789	0.109789	3.09766	2.81816	-0.202818	0.953328	2.50648	0.273887	4.73618	2.15589	-0.582224	-0.124941	2.91298	2.67531	3.0236	-0.0944039	4.16969	1.23881	3.48359	4.3648	0.210222	0.743685	3.61571	2.33572	2.56001	1.73021	0.00367044	0.69704	2.47557	2.66096	1.14067	0.969701
ITSN1	3.54395e-08	-7.45051	2.12245e-06	0.489344	4.34627	5.11247	3.5926	3.35284	3.21567	4.35344	3.64336	4.67851	4.03133	4.5999	3.5818	3.99554	4.21876	4.21876	4.21876	4.60545	4.75244	3.93617	3.79416	3.95438	3.5947	3.62726	3.13173	3.67891	3.0668	3.76975	4.55426	4.02714	3.85036	4.40176	3.9061	3.36994	3.21254	3.62156	3.52363	3.60007	3.95798	3.6441	3.56262	3.55271	4.59845	3.7539	4.4586	3.3008	4.2184
ARHGAP15	3.56946e-08	-7.4474	2.13151e-06	0.405053	7.60334	7.38409	7.15463	7.60408	7.48636	6.3106	6.96613	5.9765	6.85518	7.23131	6.9159	6.88733	7.27946	7.27946	7.27946	7.92602	7.74239	7.32339	7.2855	7.20081	7.17473	8.88807	7.24725	6.76249	7.28701	8.16785	7.46466	7.36794	6.56817	7.3397	7.19028	7.499	7.65273	7.06136	7.07568	7.55992	7.13866	7.7571	7.89648	6.98748	7.12133	7.56615	6.91448	7.27563	7.02036
AURKB	3.63307e-08	-7.43973	2.16321e-06	-0.642952	1.47132	1.07292	1.81973	1.54047	2.86983	1.10241	2.21252	1.88774	1.9303	0.142039	2.00868	2.15078	1.45834	1.45834	1.45834	0.952108	0.0960209	3.47158	1.84956	1.90352	1.56004	0.258256	1.52495	2.01129	-0.218941	0.345927	2.1851	2.36179	1.68629	1.40696	0.400796	1.47141	2.15946	1.58014	1.3034	1.40592	1.46014	1.26621	1.81641	1.11607	0.0838085	1.16302	0.637286	0.900503	1.36675
ESCO2	3.78101e-08	-7.42239	2.24478e-06	-0.703008	1.37445	0.370464	1.23338	0.870759	2.35323	0.597337	2.49434	2.24022	1.24988	-0.251646	1.70904	1.86982	1.98374	1.98374	1.98374	1.48366	0.509359	3.59784	1.53693	2.00276	1.91459	0.658332	1.60512	2.11793	0.688124	-0.169397	1.78956	2.24433	1.60446	0.773596	0.833799	0.333234	1.38438	1.56159	1.4503	1.08471	1.46014	0.894043	2.18378	0.711941	0.48195	0.569606	0.812462	0.99531	1.61172
DRAP1	3.89642e-08	-7.40933	2.30663e-06	0.57473	3.75152	3.80148	3.76336	3.4399	2.64472	4.0002	3.03316	2.86051	3.83705	4.14255	2.9998	3.46608	3.44819	3.44819	3.44819	2.95463	3.74796	3.55538	3.29797	3.13804	3.28716	3.88037	3.04815	2.94565	3.88752	2.97032	3.33172	3.10073	3.11584	2.12327	2.45404	4.34517	3.78156	3.39416	2.71973	3.50805	3.41036	2.669	3.24593	3.20052	4.11909	3.22304	2.0759	2.99145	3.66641
SDF2L1	3.99933e-08	-7.39801	2.36076e-06	-0.573276	1.77619	1.93872	2.14679	1.18488	3.18807	1.31535	2.1909	2.19884	2.36595	0.954541	2.17864	2.44827	1.6663	1.6663	1.6663	1.84983	0.678717	1.66505	1.55858	3.3575	2.02148	1.2745	2.44442	2.75225	1.55662	1.17857	2.1851	2.18889	2.06407	0.917625	1.21508	1.50256	1.15472	2.35857	1.81815	1.95754	1.57362	1.43284	1.17347	1.96252	1.53286	1.90671	1.46479	1.48364	1.25579
LYPLAL1	4.01152e-08	-7.39669	2.36117e-06	-0.299343	4.33917	4.45932	4.13928	3.99993	4.72285	4.50682	4.06492	3.95835	4.08562	4.54667	4.56968	4.54799	4.59871	4.59871	4.59871	4.49261	3.8131	4.09943	4.7639	4.46011	5.29061	4.24851	4.73818	4.28223	4.37961	4.46194	4.04218	4.66753	4.17384	3.91032	4.51157	4.49209	4.25297	4.35621	4.49174	4.98824	4.63851	4.59177	4.45599	4.48519	4.17396	4.46099	4.77394	4.41047	4.4376
FUT8	4.14838e-08	-7.38212	2.43474e-06	-0.416231	4.1367	3.80148	4.36438	3.4229	4.97174	3.95553	4.30527	4.1977	3.99127	4.32117	4.15054	4.06093	4.13377	4.13377	4.13377	3.8185	3.47069	5.04545	4.72133	4.69658	4.46175	3.32008	4.83943	4.55085	4.46144	3.05228	3.8713	4.16281	4.5326	3.18792	4.41591	3.55961	3.73376	4.46499	4.30301	4.00442	4.07053	4.40672	4.65627	4.51668	4.05232	4.15951	4.15141	4.18433	4.32531
SLC16A14	4.18855e-08	-7.37794	2.44377e-06	-0.92635	0.543142	-1.41995	0.0839423	-1.44581	1.87089	-0.18654	1.57528	1.66277	1.40432	-1.6763	1.61738	1.75597	0.810409	0.810409	0.810409	0.826271	0.718122	0.54023	0.495426	1.8588	1.08893	-1.21229	1.4916	1.5023	-0.965438	-2.99184	1.43691	1.4482	-0.0558753	0.526378	0.0712903	-0.906307	0.544027	0.691663	0.533754	0.146905	-0.37728	-0.236686	0.350508	1.13938	-0.0218575	-0.18441	0.00458762	-0.160619	-0.216391
SMAP2	4.194e-08	-7.37737	2.44377e-06	0.803817	10.331	11.2918	9.49749	10.6216	9.30442	10.0445	8.91043	8.70174	11.1169	9.87592	9.14767	9.80694	9.34849	9.34849	9.34849	9.75546	11.3933	8.64386	8.57597	9.53039	8.25975	10.5183	9.22993	8.32353	8.3764	9.56253	9.76834	10.2431	8.61837	11.4252	9.49775	10.1606	12.0501	8.60127	8.82576	9.75686	10.2642	9.51526	9.44593	8.58989	9.29055	9.62949	10.0785	9.6001	9.03262
MAGED1	4.19945e-08	-7.37681	2.44377e-06	-0.460842	3.59644	3.34466	4.59301	3.08761	4.98383	3.59103	3.84719	3.43033	3.53656	3.50298	4.08362	3.73005	3.61216	3.61216	3.61216	3.5859	2.48283	4.11901	3.64019	3.83633	3.57143	2.49309	3.89551	4.13445	3.28798	3.42471	2.88949	3.94168	4.32929	2.94898	3.73723	3.14165	3.16183	4.07493	4.10811	3.73034	3.45251	3.59472	3.30079	3.8743	3.10133	3.99844	3.43865	4.06918	3.84951
Z99127.3	4.27227e-08	-7.36934	2.47913e-06	0.83217	1.54852	1.07292	1.23338	-0.546222	-0.49533	2.11852	0.0692914	0.515704	0.880319	1.77875	-0.507509	-0.259848	1.34191	1.34191	1.34191	0.101419	2.27393	1.99665	0.664728	-0.689037	1.3573	0.431807	0.448797	0.128561	2.42523	0.256548	-0.452239	0.474065	1.25199	0.334376	0.92441	1.33961	0.265333	1.46511	1.13983	0.309666	1.11497	0.245196	0.604204	1.46869	2.6028	0.414775	-0.317643	0.867463	2.13504
INKA1	4.38975e-08	-7.35756	2.54012e-06	-0.630679	1.43544	1.07292	1.23338	1.66133	2.25025	1.87164	2.13537	1.98831	1.35465	-0.178113	2.21036	2.29365	1.25872	1.25872	1.25872	1.48366	0.678717	0.240058	2.29877	2.25365	2.08858	0.586704	2.7707	2.69311	0.464465	-0.169397	0.969156	1.19038	1.36989	0.917625	0.703391	1.37371	1.81025	0.657141	1.58361	2.68716	2.21497	0.48089	0.0986003	1.43141	0.913144	0.494266	1.43831	1.93012	1.0715
KIAA1109	4.41731e-08	-7.35484	2.54889e-06	0.519965	9.14494	9.47219	8.85065	9.30684	8.73201	9.28668	7.97081	7.59167	8.56751	9.15084	8.10415	8.74052	8.7722	8.7722	8.7722	8.40322	9.57513	8.95986	8.27835	8.06094	8.66308	9.64132	8.31847	7.57359	8.9269	9.06966	8.79755	9.16974	8.42889	8.65584	8.26257	9.64384	9.83285	8.70115	8.67824	8.94441	9.39509	8.31696	9.14104	8.48889	9.1895	8.9092	8.35872	8.79631	8.58447
ARHGAP11A	4.50867e-08	-7.34595	2.59431e-06	-0.528386	2.55278	1.91823	3.01393	2.1486	3.71349	2.5131	3.06323	3.04305	1.99657	1.90255	2.78493	2.59897	3.51244	3.51244	3.51244	2.55262	1.77316	4.19782	2.75777	2.71319	1.89598	1.18031	2.55352	2.56701	2.71938	1.95117	2.73561	2.81972	3.13262	2.078	2.4129	1.97191	2.25931	2.89883	2.26641	2.40448	2.57257	2.59056	3.02479	2.51934	2.28602	2.24221	2.60253	2.67559	2.2553
HSPA13	4.52609e-08	-7.34428	2.59706e-06	-0.416217	4.05109	4.04772	4.00448	3.59967	5.26212	3.90004	4.67791	3.93334	3.69461	4.13536	4.58488	4.14249	4.62801	4.62801	4.62801	3.92466	3.17748	4.26963	4.0939	4.3104	4.53875	4.38673	4.31571	4.18745	4.14032	3.61653	3.38916	4.44898	4.42093	3.42937	3.87236	3.68711	4.12646	4.42194	3.80293	4.1223	3.59373	4.06257	3.96109	4.13999	4.37208	4.24818	3.7227	4.02117	3.78604
H4C2	4.77839e-08	-7.32072	2.73044e-06	-0.693523	3.54343	2.0559	3.93734	3.07679	4.24903	3.63701	4.71436	3.4063	3.12726	2.91836	4.17887	4.03268	4.02469	4.02469	4.02469	3.86724	1.75433	5.14109	3.6094	4.53781	4.31537	2.16452	3.87301	3.94465	3.0668	2.51078	2.34846	4.26016	4.02677	2.26469	3.8143	3.17103	3.26152	3.72101	2.9629	3.67167	3.05144	3.83907	3.96487	3.01135	2.83239	3.34599	3.24599	3.00671	3.20366
ARG2	4.78512e-08	-7.32011	2.73044e-06	-0.909515	0.934818	-0.634794	2.12838	0.920042	0.820048	0.687501	0.0692914	1.8526	-2.84757	-0.909173	1.00834	1.69548	0.520189	0.520189	0.520189	1.7143	0.0349158	-0.488516	2.12099	1.51896	1.38425	-0.29724	1.95026	2.07886	-0.218941	0.345927	1.06627	0.519716	0.529759	0.847407	0.358086	0.698642	1.02454	0.11168	0.775885	1.90757	1.52929	0.436732	-0.276478	0.680507	-0.259691	0.241307	2.10985	2.2579	-0.138532
ERMAP	4.99264e-08	-7.30167	2.84096e-06	0.501285	4.38722	3.92472	3.93734	3.89291	3.36485	3.68705	3.77998	4.04262	3.6846	5.70309	3.52618	4.28271	3.7015	3.7015	3.7015	4.63077	3.87543	4.15421	4.20792	4.07331	3.74265	4.45871	3.42908	3.95906	4.09709	4.12576	3.86457	3.80548	4.57924	4.14795	4.12251	4.12265	3.84722	3.55749	3.11538	4.22107	3.48188	4.201	3.43764	3.00502	3.97202	3.92862	4.32043	4.17424	4.29757
HMGA1	5.1783e-08	-7.28581	2.93847e-06	-0.434588	6.05301	5.53543	6.72394	6.47903	6.93881	5.86782	6.34785	6.13114	5.79891	5.8277	6.38578	6.35602	6.31508	6.31508	6.31508	6.11188	4.95363	7.52239	6.49412	6.65747	6.12467	5.07076	6.4277	7.04015	5.7554	5.12687	5.28414	6.32884	6.48078	5.52202	6.14086	5.37952	5.84511	6.163	5.80788	5.92359	5.96913	6.25165	6.53463	5.91691	5.69716	5.86842	6.21328	6.10017	6.25303
ANO7L1	5.19696e-08	-7.28425	2.94094e-06	0.775756	2.51984	1.2798	2.28616	0.819733	1.02111	2.90949	1.70299	2.5564	2.73933	2.759	1.21006	1.94102	1.84803	1.84803	1.84803	1.17498	2.78143	1.83247	2.164	2.40646	2.69511	3.22892	1.95026	2.20519	2.93114	0.509613	2.80759	1.64643	2.09007	1.67365	1.71559	2.95157	2.42329	2.34779	1.75494	1.14346	1.67883	0.565349	1.56075	2.11138	2.77833	1.5076	1.87336	1.76053	2.91504
HJURP	5.24278e-08	-7.28044	2.95793e-06	-0.786328	1.6694	0.486345	2.48733	1.3736	3.06452	0.730555	2.48548	2.08232	0.948865	-0.32913	1.95352	2.436	2.0838	2.0838	2.0838	1.84983	0.596521	3.66152	1.84956	2.72984	1.75852	1.02639	2.37294	2.51917	1.09207	0.43009	2.16331	2.44696	2.01966	0.917625	0.953391	1.30469	1.72898	1.59845	1.60169	1.80212	1.57362	1.0191	2.23476	1.27183	-0.395134	1.52663	0.589954	1.37028	1.67777
CYSLTR1	5.25578e-08	-7.27936	2.95793e-06	0.496026	5.9001	6.07488	5.21564	4.97456	5.56268	5.92338	4.88735	4.44778	4.97677	6.38445	4.81633	5.12908	6.05415	6.05415	6.05415	4.42548	5.99019	5.64159	5.60111	5.00605	5.83461	6.79999	5.38945	5.17472	6.1037	5.42743	6.07146	5.82571	5.443	4.46761	4.92033	6.78639	6.08445	5.47333	5.24624	5.64223	6.23543	5.18745	5.86159	5.40284	6.49572	5.06454	5.13298	5.36212	5.99036
TNFRSF8	5.3375e-08	-7.27266	2.99571e-06	0.445617	3.47958	4.11678	3.45165	2.24845	2.82574	2.772	2.55484	3.0966	3.00382	4.06517	2.9537	2.54286	3.48525	3.48525	3.48525	3.64921	3.54926	2.49306	3.15603	3.72447	2.46195	3.66252	3.05387	2.77688	3.18162	2.99816	3.48008	3.45811	2.34169	3.42937	3.77018	2.5207	1.78366	3.11774	2.52508	3.09695	3.44656	3.96877	2.34327	2.23554	4.38764	2.86763	3.81821	3.19824	2.98628
E2F8	5.46004e-08	-7.2628	3.05613e-06	-0.781879	1.66363	0.370464	1.16278	1.50861	3.0871	0.812989	2.30601	1.77964	1.40432	-0.251646	2.27177	2.18051	1.60026	1.60026	1.60026	1.84983	-0.485548	3.97964	1.57992	2.71319	1.51196	1.13081	2.27831	2.24102	0.523713	-0.298914	1.84535	2.66579	2.1324	0.882943	1.1664	1.11616	2.00693	1.70368	1.52798	1.89052	1.88637	1.85811	2.34327	0.914664	-0.196457	1.42886	0.437861	1.5266	1.85952
AC131011.2	5.51692e-08	-7.2583	3.07958e-06	1.20345	1.99246	1.71942	1.01029	0.400825	-0.792379	2.50072	-0.91039	-0.670686	-0.564143	3.17141	0.9343	-2.41095	1.56606	1.56606	1.56606	-1.42446	2.73416	1.96816	1.27444	-0.780396	1.32983	1.07955	0.413608	-0.668244	2.98483	-0.776423	1.15725	0.474065	0.188364	0.051699	-2.04742	2.82173	2.13864	1.36171	0.897946	0.785978	2.2833	-1.94503	1.24981	0.85959	2.30799	0.925576	-1.99905	0.932802	2.2553
AC022400.8	5.54781e-08	-7.25588	3.08843e-06	0.472034	2.85621	2.70857	2.5017	2.76238	2.35323	2.698	2.42193	3.13367	2.61829	3.31203	2.14621	3.06519	2.48246	2.48246	2.48246	2.3234	2.76271	2.65377	2.31158	3.21693	2.64026	2.45337	2.64738	3.11615	3.1061	3.61653	1.20067	1.92615	3.27166	2.3811	2.92554	2.03719	3.00956	2.53053	2.42711	2.18433	1.65839	2.67851	2.48688	2.26763	2.77044	2.29865	2.66096	2.08185	3.41207
UTRN	5.65372e-08	-7.24767	3.13776e-06	0.40393	8.8537	8.97141	8.96268	8.70928	8.32882	9.11058	8.17253	8.28192	8.0312	9.15763	8.22163	8.06691	8.80074	8.80074	8.80074	8.0893	8.79356	9.16708	8.04539	7.64098	8.40646	8.23295	7.9246	8.08823	9.20715	8.66046	8.10107	8.17945	8.95346	8.26547	8.57454	9.23076	9.50821	8.93108	8.77214	8.34068	8.63812	8.34168	8.91709	8.80318	9.52165	8.49829	8.42491	8.62713	8.9868
SLA	5.66697e-08	-7.24665	3.13776e-06	0.656125	9.93306	10.9097	9.60582	9.62137	9.15631	9.67748	8.69523	7.68796	10.0549	9.93038	9.29662	9.94858	9.31832	9.31832	9.31832	9.74508	11.0534	8.54784	8.97855	9.08446	8.68746	11.1443	9.20498	7.84017	8.82808	9.95141	9.3403	9.90206	8.42857	10.232	8.4023	9.80859	10.8725	9.19381	8.8692	10.435	10.2347	8.78885	9.46031	9.03445	8.6759	9.76751	8.56995	9.34145	8.79102
GORASP1	5.74047e-08	-7.24105	3.16991e-06	0.377186	5.67677	5.99031	5.55064	5.7967	5.11601	5.8834	5.06724	4.87956	5.89107	5.85204	5.3875	5.45821	5.4039	5.4039	5.4039	5.02375	5.93795	5.32367	5.62568	4.76886	5.1465	5.76355	5.12969	5.02346	5.72732	5.12372	5.37223	5.52075	5.60356	5.54438	5.05177	5.91628	5.92635	5.5506	5.11866	5.58774	5.65137	5.12795	5.08572	5.27844	6.28409	5.57244	5.17569	5.48565	5.55351
ZNF496	5.83334e-08	-7.23408	3.20735e-06	0.734254	5.56667	6.70506	4.98957	5.00628	4.88202	5.9	5.41492	4.27936	4.91814	5.41308	5.26826	4.32325	5.31276	5.31276	5.31276	3.85655	5.4203	5.28521	5.20255	3.40492	5.37198	5.86921	4.67085	4.48762	5.112	3.83295	5.36032	5.40995	5.20694	4.38327	3.93181	6.30438	5.9309	5.42542	4.83899	5.3972	5.25861	3.58464	5.65252	5.10431	5.91235	5.75701	3.56028	5.61071	5.86602
SCLT1	5.83949e-08	-7.23362	3.20735e-06	0.466696	7.17182	7.25166	6.18716	7.16844	6.99911	7.27423	5.86667	5.34071	6.52558	6.95669	5.84694	6.52485	6.92842	6.92842	6.92842	6.74186	7.45193	6.88524	6.83529	6.46826	7.05507	7.04766	6.61749	6.50379	7.15973	7.36336	7.33364	7.30047	6.44973	7.12508	7.02905	7.53946	7.77923	6.54748	6.18288	6.57771	6.96233	7.28193	7.29888	6.20895	7.245	6.56997	7.02148	6.72512	7.09125
MBNL3	6.03871e-08	-7.21906	3.30793e-06	0.860232	8.64883	7.02371	8.14639	8.45301	6.41715	7.88785	6.32631	6.94498	6.17301	8.86584	6.19685	8.66054	7.44058	7.44058	7.44058	9.67037	7.56532	7.63117	8.05208	9.1329	8.21962	8.69906	6.94197	8.16505	8.41872	7.66309	7.49223	7.42416	9.26456	8.70289	9.49905	8.56209	7.87638	7.34166	6.60029	6.46274	7.66639	8.9767	7.20412	6.36107	8.66663	7.0233	8.81685	7.203	8.74586
C2CD5	6.2124e-08	-7.20674	3.38925e-06	0.260586	6.09929	6.16894	5.92321	5.8675	5.90749	6.01765	5.48101	5.91075	5.85803	6.46699	5.46678	5.25142	6.14454	6.14454	6.14454	5.6983	5.88591	6.49495	5.70307	5.4282	5.7849	6.00248	5.57706	5.73357	6.14438	5.81557	5.9367	5.71109	6.18401	4.85077	5.8725	5.91483	5.63067	5.97959	5.9363	5.70331	5.85029	5.79982	5.99418	5.98764	6.47281	5.89887	6.00916	5.76444	6.06322
MIR1262	6.22017e-08	-7.2062	3.38925e-06	-0.825473	-0.649017	0.10638	1.04995	-1.44581	0.255113	-1.54763	-1.7824	-3.41295	-1.00806	-1.48679	-0.730228	0.323309	0.0115755	0.0115755	0.0115755	0.991727	-0.485548	-4.34055	-0.498981	-1.09534	-1.19784	-0.97702	-0.2538	-1.19771	-2.59903	-0.169397	-2.4292	-0.666856	-1.84933	-0.382196	0.66886	-1.77866	0.102795	-0.517488	-1.10445	-1.4824	-0.464237	0.0242815	-0.426831	-1.31333	-1.68349	-0.790973	-0.14755	0.350518	-0.385974
H2AX	6.30773e-08	-7.20013	3.42383e-06	-0.494648	4.10715	3.71504	4.98702	3.88673	4.97174	3.47556	4.7573	4.26273	3.89031	3.69134	4.52938	4.63107	4.20215	4.20215	4.20215	4.26498	2.7721	5.8096	4.59343	4.98886	4.27273	3.22892	4.44333	5.12923	3.47221	3.23886	3.77403	4.52929	4.62443	3.31043	4.20616	3.77265	3.82132	4.12946	4.15477	3.77748	4.06666	4.41812	4.70905	3.6411	3.78493	3.75793	3.7172	3.807	4.35253
IGHV2-70	6.32267e-08	-7.1991	3.42383e-06	-1.51782	0.611382	1.74291	1.39609	1.57165	2.8871	1.28679	0.443073	-1.87836	1.74996	-2.46497	-4.34055	1.52058	-1.74705	-1.74705	-1.74705	0.535949	-2.45536	-0.949977	-1.89553	3.58501	-0.12165	-2.99075	1.62064	0.406176	-1.83269	0.161263	-0.32362	2.4704	0.805627	-1.29225	0.92441	-2.55295	1.31181	0.941605	-0.183114	0.257426	0.339424	-0.310035	-2.23257	0.237642	-0.711413	2.27634	0.0750347	0.612214	0.782241
FKBP14	6.33364e-08	-7.19835	3.42383e-06	-0.489403	1.77462	0.831326	1.30068	1.77284	2.97046	1.28679	2.37476	2.03608	1.35465	1.13848	2.07908	1.75597	2.22197	2.22197	2.22197	1.51118	1.17988	2.18176	1.91817	2.14611	2.02148	1.2745	2.23864	2.18079	1.86226	1.56105	1.81773	2.54956	2.25239	0.951492	2.01954	1.30469	0.665482	2.24693	2.09833	1.64833	1.31101	1.60233	1.73021	1.92277	1.72477	1.89211	1.70587	1.89776	1.9691
NETO1	6.46435e-08	-7.18947	3.48117e-06	0.973216	1.56816	1.62143	-1.00436	-0.0908156	1.25187	1.34336	1.9288	1.57924	0.56803	1.19493	1.17834	1.05883	0.288181	0.288181	0.288181	0.481329	-0.0956537	-0.949977	1.44691	1.2685	2.27296	0.34764	2.12359	0.900274	1.24073	-0.776423	1.28379	0.519716	0.188364	0.882943	-0.506244	0.262205	1.34855	0.30246	1.92252	0.0272092	0.485788	-0.745959	-1.12687	1.85399	-0.077742	0.925576	0.00458762	2.17931	0.860171
STS	6.47361e-08	-7.18885	3.48117e-06	0.568021	4.59807	5.39976	3.4954	4.10489	4.3798	4.66777	3.60299	4.2151	4.63058	4.35563	3.39432	4.04081	4.51605	4.51605	4.51605	3.77942	5.08754	3.73946	3.52941	4.01677	3.81872	4.81665	3.85345	3.16672	4.03735	3.44508	4.32328	4.20534	3.6839	5.52202	3.86475	5.13806	5.95492	3.50507	3.63754	4.12594	4.80348	4.17099	4.25766	2.92009	4.32167	3.55508	5.3998	3.53975	3.95983
UBC	6.63199e-08	-7.17836	3.55703e-06	0.334329	8.66409	9.0251	8.45252	8.65004	8.64683	8.72091	8.09698	7.77441	9.33207	8.66069	8.7079	8.66136	8.19817	8.19817	8.19817	8.69072	9.07079	8.07981	8.22434	8.53686	8.37888	9.22308	8.19664	7.88168	8.48217	9.03228	8.3147	8.89937	8.20203	8.37481	7.95142	8.84691	9.04767	8.05323	7.95578	8.61268	8.92629	8.58758	8.08128	7.92946	8.49513	8.47857	8.37888	8.64612	8.18791
CDCA2	6.76354e-08	-7.16983	3.61814e-06	-0.779945	1.46068	0.786813	2.3825	0.654842	2.77099	0.398109	1.83433	2.50074	1.49879	-0.178113	1.75277	1.73609	1.87621	1.87621	1.87621	1.27471	0.367867	3.96169	1.57992	1.96106	1.58349	-0.97702	1.75322	1.29062	0.523713	-0.0505548	1.97607	2.42313	2.02865	0.695804	1.09016	0.851638	1.48681	1.5428	0.926914	1.30659	1.67883	1.07779	1.8495	1.18489	0.229077	1.00914	0.727531	1.08427	1.1039
CDC20	6.86503e-08	-7.16336	3.65401e-06	-0.953563	2.00259	1.43208	2.72638	2.06343	3.80717	1.03531	2.88617	2.31957	2.59708	-1.03337	2.60573	3.21634	2.50068	2.50068	2.50068	2.29201	0.154643	4.50105	2.32428	3.08726	1.77898	-0.774792	2.70673	2.33245	0.199655	-0.298914	1.92519	2.63501	2.29027	0.773596	0.833799	1.62084	2.1175	2.13849	1.771	2.4748	2.0522	1.80699	2.41133	1.16231	-0.544624	1.72091	1.07561	1.79608	1.58901
CAV2	6.86616e-08	-7.16329	3.65401e-06	-0.857642	1.96772	0.244456	1.84249	4.20273	1.35474	2.698	2.61291	3.05855	0.732608	-0.909173	1.64085	3.13517	1.12419	1.12419	1.12419	2.70341	1.55112	0.191583	3.3298	2.59093	1.56004	1.02639	2.47888	2.60418	0.635375	-0.298914	2.54659	2.95048	2.31987	2.34333	0.0712903	0.527476	3.35477	1.34011	2.67774	1.58615	1.77688	2.22561	0.482925	2.32973	0.0838085	2.1954	2.49101	1.39367	2.68813
TRIP13	6.9985e-08	-7.155	3.71481e-06	-0.781246	1.31181	-0.899936	1.5423	1.33778	2.86112	0.597337	2.15784	2.05166	1.40432	-1.03337	1.83645	2.22398	1.56606	1.56606	1.56606	0.91137	0.509359	3.6391	1.6821	2.39607	1.46223	0.0609361	2.20816	2.07886	-0.124941	-0.441216	2.16331	1.80232	1.60446	0.847407	0.400796	0.698642	1.5194	1.05201	1.28114	1.08471	0.852516	0.827198	1.39134	0.193785	-0.395134	1.40848	1.04083	1.3465	0.860171
H3C7	7.04884e-08	-7.15188	3.73189e-06	-0.842971	4.05643	3.12981	4.82215	3.56135	5.28835	3.13454	5.40791	3.33169	4.23034	2.50367	4.78508	4.82706	4.45896	4.45896	4.45896	3.89363	0.967398	6.22231	4.48169	5.27071	4.97535	2.94371	4.75233	5.50948	3.22689	2.69216	3.6146	4.98076	4.30914	2.56736	3.51712	3.51448	3.92834	4.18806	3.63754	3.40976	3.32217	3.92948	4.57946	3.69715	2.39268	3.28583	2.66096	3.50257	4.44394
ASCC2	7.13186e-08	-7.1468	3.76449e-06	0.745824	7.23465	6.58671	6.60667	6.59452	5.71547	6.01547	5.81017	5.70325	5.36952	7.68647	5.54349	7.61637	6.30021	6.30021	6.30021	8.25465	5.91376	6.73742	7.31442	7.85603	6.77091	6.69958	6.00114	6.86892	6.4816	6.63157	6.64137	6.15893	6.99138	8.10404	8.49284	6.8231	6.21329	6.06436	5.90298	6.49975	5.9001	7.46895	6.39102	5.52401	7.62269	5.96315	8.02566	6.31222	7.41791
DAAM2	7.15257e-08	-7.14554	3.76449e-06	1.77974	5.98889	6.4963	-0.359931	1.69002	2.26353	3.62565	3.04526	3.27309	6.11266	1.76016	2.11304	3.03296	2.22197	2.22197	2.22197	3.2606	6.61676	0.75561	1.07852	3.35213	2.24382	4.66841	2.60121	2.37608	0.969573	0.912091	3.47125	4.7198	0.47818	8.872	3.08464	5.67955	8.2446	2.7264	1.48966	2.4975	3.48769	3.74714	2.22218	1.60887	0.884184	1.60034	6.61976	0.487292	0.860171
SYTL3	7.16539e-08	-7.14476	3.76449e-06	0.584038	6.16264	6.31324	6.1397	5.47262	5.14141	6.17593	5.2561	4.64038	5.83784	6.32008	5.36125	6.1722	5.75828	5.75828	5.75828	4.91203	6.19347	5.42281	5.03887	5.40117	5.24538	6.65102	5.43622	4.56034	5.91467	5.85986	5.83529	5.67498	5.78099	6.41753	5.32141	6.62059	6.19449	5.89416	5.81661	6.10728	6.42202	5.52983	6.2006	5.70381	5.9849	6.19197	5.61901	5.28915	5.77338
AL592158.1	7.66507e-08	-7.11548	4.01673e-06	1.77542	3.09663	4.83763	-1.59917	-0.842386	0.1446	-0.449386	0.479204	1.34645	2.90376	-0.178113	-0.314619	0.889174	-0.538492	-0.538492	-0.538492	1.17498	3.52169	-2.03223	-0.690032	0.720632	-0.199563	2.0626	-0.434367	0.274036	-2.16556	-0.978629	1.15725	1.72648	-1.72321	5.99264	0.314074	2.29021	5.15585	0.548323	-1.22672	-0.246852	1.0537	0.683432	-0.889987	-0.703193	-2.08021	-0.888441	3.74987	-1.93965	-2.37677
SLC2A5	7.80434e-08	-7.10766	4.07931e-06	-0.767303	1.91247	0.10638	1.62341	1.01383	3.20194	1.3978	2.73747	2.70172	2.50902	0.665934	1.87654	2.47251	1.45834	1.45834	1.45834	2.05076	1.15138	1.76782	2.65094	2.32113	2.21408	0.586704	2.17703	3.36921	1.58471	0.161263	2.4952	3.03936	1.42541	2.58904	2.8272	1.53305	1.72898	1.42463	1.48966	1.66847	1.85079	2.2766	-0.206797	1.20712	0.69704	1.68748	0.589954	1.99274	1.95141
CCNA1	7.93463e-08	-7.10047	4.12786e-06	1.40459	3.33941	4.38661	1.93012	0.175847	1.72489	2.90949	0.54886	2.5564	5.12855	1.51617	1.5195	1.94102	0.949532	0.949532	0.949532	-0.222025	3.58167	0.971965	1.96757	0.68692	0.62976	0.913827	3.32403	0.674275	1.30968	1.86308	2.97951	1.89184	0.529759	-0.0789505	-1.33657	4.95875	4.43908	1.38299	-0.381909	1.98992	3.2143	-0.387314	-0.140326	1.8819	0.99669	2.219	-1.73521	1.46167	0.699859
EMC3	7.93741e-08	-7.10032	4.12786e-06	0.487832	5.55494	5.07131	4.91098	5.59526	4.8383	5.13847	4.6425	4.59059	5.11369	5.92059	4.86944	5.39146	5.07664	5.07664	5.07664	6.77417	5.00432	5.03347	4.92678	5.75031	5.17187	5.41118	4.93093	4.78534	5.1501	5.08205	4.77502	4.98686	5.7031	5.40161	5.98467	5.01384	5.34727	4.66718	4.69275	5.14921	5.02717	5.76564	4.54705	4.58193	5.22203	5.02828	5.80538	5.06888	5.29751
PICK1	8.1447e-08	-7.08912	4.2155e-06	0.403102	3.04734	4.07574	2.89919	2.55962	2.79863	3.05208	2.69201	3.18401	3.81885	2.72107	2.64107	3.04109	2.74184	2.74184	2.74184	2.55262	2.97278	2.89235	2.0309	2.62693	2.53594	2.1397	2.20816	2.7272	3.00577	2.49133	3.08756	2.6556	2.88282	4.00206	3.27459	2.80933	2.87752	2.56818	2.65195	2.7357	2.75687	2.96167	2.45499	2.58022	3.12008	2.60655	3.11836	2.6369	2.22616
ST13	8.14698e-08	-7.089	4.2155e-06	0.574205	5.7496	5.40345	5.52975	5.59904	5.1787	5.25733	4.9255	4.96019	4.57202	6.36844	4.90622	5.90473	5.23192	5.23192	5.23192	6.66965	4.72127	5.6969	5.4369	5.81611	4.97757	5.12865	4.96627	5.12923	5.01467	4.95286	4.56261	5.06977	5.80474	5.49787	6.17047	5.5345	5.03989	5.2541	4.91686	5.02386	5.48437	5.95365	5.37989	4.89088	5.97206	4.93876	5.98649	4.90962	5.38579
H2AC12	8.47874e-08	-7.07167	4.36796e-06	-0.890563	2.28739	2.18156	2.65102	2.1486	3.77043	2.00035	3.61927	1.98831	3.18524	0.743676	3.40121	3.50771	2.58847	2.58847	2.58847	2.33884	-0.676741	4.0322	2.54645	3.71614	3.16034	-0.167713	2.89072	3.35837	1.24073	0.656605	1.97607	2.99964	2.52442	1.07953	1.55469	2.09964	2.05218	2.57744	1.3034	1.66847	1.55163	2.47523	3.03201	1.93614	0.663345	1.93548	1.29809	1.81353	2.45687
MAP3K13	8.48417e-08	-7.07139	4.36796e-06	0.526497	3.28478	3.48362	2.98353	3.21154	3.28894	3.25001	2.88617	3.23266	2.41523	3.40469	2.9443	2.66355	2.93507	2.93507	2.93507	2.48482	3.76217	2.96625	2.78558	2.68785	3.11278	3.84243	3.07091	3.09673	3.51664	2.75877	2.9027	3.35484	2.72029	3.03836	2.87342	3.69387	3.91002	2.79945	2.43721	2.80102	3.14254	2.59056	2.84779	2.6549	3.31713	2.71007	3.10158	2.81208	2.46935
IGHV6-1	8.53384e-08	-7.06886	4.38255e-06	-1.315	1.58927	1.10953	1.67505	1.26335	3.62365	1.81275	2.75968	0.515704	1.54381	-1.31931	2.66416	2.3601	2.44532	2.44532	2.44532	0.869448	-2.14142	0.721873	1.49262	3.55729	2.69511	2.28255	3.88591	-0.962155	-0.319495	-2.30715	1.63985	3.21615	1.20517	-1.29225	0.737115	-4.34055	1.2354	2.55886	1.08947	1.70794	1.55163	1.18845	-1.97918	1.43141	-0.625609	2.07129	1.96896	1.81353	0.612487
ACTR3B	8.56173e-08	-7.06744	4.38591e-06	-0.282743	2.55461	2.2812	3.02392	3.03266	2.65483	2.68712	2.25482	2.86933	2.50902	2.49245	2.45503	2.94909	2.14299	2.14299	2.14299	2.73876	2.54988	2.72363	2.62038	2.77867	2.59482	2.03595	2.93482	3.10323	2.53009	1.95117	2.94161	2.96705	2.38434	2.6104	2.58944	2.23563	2.13864	2.44205	2.70308	2.94009	2.66766	2.22561	2.3777	2.71043	2.7057	2.62433	3.02357	2.96046	2.46935
SASH1	8.6367e-08	-7.06365	4.41331e-06	0.809533	3.32506	4.80172	2.84386	1.30105	1.3297	2.01784	1.68763	2.96293	1.0769	4.51654	1.56927	1.29457	3.5953	3.5953	3.5953	1.48366	3.45328	3.28202	3.02994	2.18285	1.3573	2.87019	0.787997	2.48968	2.99534	2.6401	3.36073	1.16187	3.35623	3.91462	2.8272	1.30469	0.102795	1.87869	1.6546	1.97382	1.97166	3.32481	2.99553	1.85399	4.68495	1.08813	3.36323	1.94603	3.53596
VANGL1	8.81349e-08	-7.05485	4.49247e-06	-0.357727	2.92395	2.32855	4.29593	2.22902	2.44935	3.13454	2.83828	3.4481	2.26202	2.8497	2.88658	2.94909	3.32581	3.32581	3.32581	2.73876	3.05971	3.93249	3.39745	3.24616	3.22886	2.5507	2.94718	3.47833	3.46467	2.67501	3.11051	2.68596	3.76685	2.59976	3.22197	2.79682	2.3345	3.02602	3.46065	3.03624	3.55556	3.07405	3.13625	3.06102	2.8845	2.86763	3.10158	2.74089	3.23325
MAP3K15	8.95691e-08	-7.04784	4.55428e-06	-0.804867	0.595354	1.95892	-0.359931	-0.686718	0.024913	1.10241	0.479204	0.90686	-0.225162	0.198349	0.856257	1.6537	0.369734	0.369734	0.369734	0.952108	2.80906	-1.81858	0.40269	0.817284	1.12133	0.658332	1.52495	0.870077	-0.965438	0.58498	0.693249	1.27267	-0.720017	1.01693	2.81935	-0.611322	1.34855	0.691663	1.08947	0.0882981	0.888056	1.92357	1.32231	-0.404641	-1.11708	-0.383194	1.66077	0.530146	-2.05729
LINC01506	9.3815e-08	-7.02773	4.75839e-06	0.786873	3.39121	3.12088	2.66385	2.69319	2.23684	4.03925	2.28575	0.42292	2.92093	3.11401	2.30152	2.16572	2.39751	2.39751	2.39751	2.49864	3.42973	1.45522	2.07665	1.97509	2.12099	4.06301	3.42025	1.40034	2.62784	2.56763	3.16634	3.39826	0.906631	3.3554	3.07807	4.5228	3.64793	2.04812	1.84875	2.91501	3.67228	3.63436	3.35364	1.73663	3.34396	2.1954	2.82325	1.97734	3.07883
ELF1	9.7138e-08	-7.01261	4.9148e-06	0.506684	8.57446	9.3751	8.55471	8.02772	8.30071	8.7169	7.41396	7.08025	8.17406	8.78152	7.89319	7.81926	8.29627	8.29627	8.29627	7.7834	9.13419	8.07772	8.01952	7.84819	7.66394	9.08998	8.2506	7.20761	8.43134	7.85562	8.31594	8.50403	7.84763	8.3538	7.46768	8.99356	9.28517	8.14951	7.81276	8.57765	9.04997	7.73733	8.09363	8.03459	8.65167	8.11155	7.7513	7.99929	8.1751
FMNL2	9.77969e-08	-7.00967	4.93598e-06	0.754735	3.69603	3.64818	2.67658	1.82552	2.08053	3.56153	2.53781	5.11465	2.90376	3.73957	2.67556	2.26618	3.64529	3.64529	3.64529	2.2104	3.60813	3.89892	2.97463	2.1949	2.70584	3.6712	1.73908	2.47971	3.57382	3.21533	3.36073	3.22306	3.54354	1.94982	2.61687	5.01924	2.15946	2.15095	3.09639	3.21807	2.44714	2.45323	2.43332	2.03887	4.87909	2.80666	3.56028	3.08783	4.11093
CADM1	9.92605e-08	-7.00322	4.99757e-06	-0.662197	1.43605	-0.0463239	1.7249	0.0923187	2.56114	1.00056	1.9288	2.59943	2.55373	0.705329	2.11304	1.21061	1.90385	1.90385	1.90385	1.80605	0.75648	0.971965	1.32586	2.40646	2.25846	0.854068	2.55352	2.31013	0.739012	0.43009	2.32903	1.32504	2.1324	0.984583	0.633482	0.945305	0.665482	1.87869	1.56531	0.257426	1.59528	0.792577	2.58837	1.96252	0.729965	0.286668	1.00519	1.76053	0.313282
LINC02785	1.00132e-07	-6.99943	5.02913e-06	0.674642	4.46861	3.79588	2.91001	2.90384	4.46275	4.37734	2.45859	2.15624	4.68685	4.5193	3.10479	3.50184	4.70859	4.70859	4.70859	3.87786	4.97208	4.32405	4.01778	3.28611	0.583988	4.28857	2.56158	3.33645	4.20962	3.02547	4.21096	4.3482	3.70649	3.60456	4.06724	4.49596	4.26743	4.01825	3.76332	3.75881	4.43731	3.56938	3.26445	3.08523	4.79795	4.70815	3.75524	3.45888	4.04572
OR2W6P	1.02647e-07	-6.98865	5.14286e-06	-0.900514	1.24354	0.786813	-1.00436	0.766836	2.11024	1.92821	1.77742	0.55995	0.732608	0.198349	1.64085	2.13569	0.446922	0.446922	0.446922	0.101419	2.56076	0.852331	1.64209	1.81265	1.56004	0.0609361	2.37294	0.987251	1.01157	1.12907	2.09591	2.75439	-0.497168	1.79053	0.0712903	1.19455	3.47595	0.91263	1.47011	3.05166	1.48356	0.683432	0.819888	2.3697	-0.625609	2.61546	0.727531	1.8813	0.612487
CHKA	1.03651e-07	-6.98443	5.18054e-06	0.560278	2.47705	3.19939	1.5423	1.69002	1.7628	1.54977	2.21252	2.52326	2.95466	2.15103	1.93466	2.12043	2.07166	2.07166	2.07166	2.06939	1.82822	2.37864	1.75893	1.96106	1.71671	1.31938	1.60512	2.28746	1.90746	1.9224	2.38657	1.89184	1.74203	2.39347	2.15045	1.30469	1.78366	1.7205	1.48966	2.06782	1.92109	2.46427	1.78254	1.60887	2.62922	1.76965	2.78173	1.91403	2.26965
ZNF215	1.06385e-07	-6.97312	5.30427e-06	-0.896126	0.00657236	-1.91265	-0.0776089	-0.300624	1.5188	-1.03378	1.106	1.1578	1.24988	-4.34055	0.593071	-0.259848	-0.538492	-0.538492	-0.538492	0.0270995	-0.782763	-2.9725	0.353986	0.00125978	0.0225843	-0.0488636	1.34987	1.22055	-3.22157	-0.599106	1.76084	1.0102	0.451682	-0.469132	-0.157447	-0.611322	0.0140993	-1.84426	-0.698412	0.257426	-0.0739705	0.720739	-1.57629	-0.338747	-0.259691	-1.85778	-0.317643	-0.739872	-0.478878
MOB3C	1.07407e-07	-6.96897	5.33989e-06	0.51799	6.54739	6.86482	6.16814	7.11257	5.58665	6.64893	5.94546	5.39668	7.01058	6.14938	6.14343	6.05873	6.17747	6.17747	6.17747	6.16266	6.80409	6.10042	6.15703	5.76048	6.01468	7.13264	5.88871	5.80115	6.44854	6.17394	6.21471	5.93399	5.84983	5.98958	5.05177	7.28446	7.20469	5.93526	5.54023	6.22247	6.81143	5.18579	6.10537	5.82376	6.28686	6.44488	5.24226	5.88593	6.06836
CPEB3	1.07619e-07	-6.96811	5.33989e-06	0.460474	5.56599	6.06793	5.40914	5.57809	5.08642	5.98246	4.69529	4.66591	5.51509	5.60366	4.85947	5.23735	5.14627	5.14627	5.14627	5.20743	5.78399	5.09241	4.9779	4.7628	5.24538	5.44954	5.30795	4.3549	5.34953	5.36732	5.59608	5.49384	4.85549	5.03777	4.70291	6.42615	6.46512	5.13842	4.85979	5.43149	5.62133	4.70081	5.33679	4.74845	5.71474	5.42935	4.62927	5.23513	5.04773
DTL	1.09677e-07	-6.95989	5.42886e-06	-0.671718	2.56179	1.85495	3.20171	2.04133	4.02169	2.21263	2.75231	3.01153	1.71102	0.88762	2.54484	3.0889	2.89431	2.89431	2.89431	2.45678	0.553598	5.15221	2.80383	3.46085	2.32953	1.31938	2.97762	3.05707	2.0146	0.656605	2.32903	3.30357	3.61692	1.91591	2.45404	2.13982	2.60128	2.40091	2.23201	2.18433	2.57257	2.67851	3.40462	1.92277	1.37529	2.15928	1.51634	2.38006	3.00356
LARP1B	1.11645e-07	-6.95216	5.51188e-06	-0.363934	3.04723	2.62253	3.19288	2.90384	3.82071	3.37738	3.161	3.74016	3.06686	3.213	2.93484	3.01657	3.24706	3.24706	3.24706	3.39225	2.30014	3.34432	3.10544	3.45084	3.17585	2.53175	3.09332	3.10971	3.01612	2.45161	3.04053	3.54898	3.44958	2.12327	3.28032	2.42639	2.77328	3.09857	3.14033	3.10437	3.10528	2.99251	2.88018	2.94014	2.99698	3.2914	3.31311	2.768	3.18863
HYOU1	1.1189e-07	-6.95121	5.51188e-06	-0.457577	5.13042	5.47358	6.1351	4.90894	6.55856	5.52831	5.09516	5.5222	5.10621	5.04971	5.30361	5.53357	5.23464	5.23464	5.23464	5.1005	4.42643	5.61771	4.91843	5.39466	4.49304	4.57433	5.12426	5.14035	4.83921	4.57255	4.54587	5.50381	6.03914	4.74853	5.1614	4.88679	4.95607	5.25554	5.05283	4.88227	5.23638	4.94104	4.39847	4.78586	5.40773	5.42048	4.86374	5.25443	4.84943
IGKV1D-16	1.16806e-07	-6.93253	5.74027e-06	-1.17706	0.226196	-2.24098	-1.00436	-0.300624	1.88814	0.964945	0.479204	-0.89123	0.880319	-1.6763	1.04398	-1.83402	0.949532	0.949532	0.949532	0.481329	-2.85718	-1.06306	-0.330297	0.720632	-0.0477314	-0.167713	1.45745	0.775495	0.523713	-2.30715	-0.925651	0.27548	1.61644	-1.46019	-1.08014	-1.77866	-1.4363	-1.34715	1.18848	1.40592	0.438631	0.0827615	-0.426831	1.18489	-1.51973	-0.888441	1.14275	0.145302	0.36766
MRTFA	1.17992e-07	-6.92815	5.78472e-06	0.322133	6.98746	7.34241	7.07817	7.05582	6.89894	7.15534	6.11652	5.94764	6.99749	7.03705	6.34261	7.03142	6.58695	6.58695	6.58695	6.85628	7.09676	6.80141	6.19469	6.57751	5.85282	7.11842	6.0888	6.09024	6.4428	6.87059	6.68503	7.01687	6.6647	6.83595	6.92727	6.8798	7.17815	6.54748	6.47104	6.88692	6.85586	6.9393	6.60474	6.34737	6.95679	6.64482	6.65253	7.01968	6.66828
AC011726.3	1.19863e-07	-6.92131	5.86245e-06	0.645114	1.67864	0.786813	0.229211	0.468644	0.628028	1.81275	1.43516	1.06874	0.168915	1.93605	0.00765148	0.375647	1.58326	1.58326	1.58326	1.4556	1.8638	1.18504	0.953328	0.720632	0.437253	0.0609361	1.60512	1.24429	2.42523	1.36117	1.43691	1.21833	1.43896	0.984583	1.37357	1.53305	0.186351	0.997866	1.34692	0.99184	0.531452	0.720739	1.22481	1.29277	2.62047	0.675715	1.14275	1.70551	1.72019
LMNB2	1.21004e-07	-6.9172	5.90418e-06	-0.379909	3.07572	2.84508	3.79871	3.20161	3.96996	3.05208	3.63137	3.74016	2.73933	3.06942	3.48787	3.60957	3.00693	3.00693	3.00693	2.87212	2.49422	4.50602	3.36095	3.53851	2.70584	2.5507	3.09332	3.22156	2.62784	2.72585	3.58213	3.04718	3.65225	2.58904	3.05151	2.95157	2.44041	3.4707	3.25328	3.19742	2.93733	2.90608	3.36513	3.06711	3.037	3.19357	2.78173	3.08783	3.15037
CLIC4	1.2517e-07	-6.9025	6.093e-06	-0.411049	5.91341	5.91991	6.10246	6.52056	6.38105	5.88697	5.70921	5.60636	5.9424	5.74387	6.31461	6.18692	5.76111	5.76111	5.76111	6.87758	5.34363	5.02658	5.96668	6.34736	5.6841	5.67134	6.17669	5.88754	5.39981	5.31017	6.10899	6.95226	6.15762	5.76992	5.81247	5.29975	6.71331	5.47581	5.50944	6.43655	6.14193	5.56871	4.59418	5.60472	6.18813	5.9968	5.97732	6.20721	5.69713
TOB1-AS1	1.25724e-07	-6.90058	6.09553e-06	0.674506	1.24325	-0.129198	-0.0776089	0.819733	0.707928	0.772361	1.32034	1.8347	1.49879	0.0834417	1.07876	1.3739	0.656425	0.656425	0.656425	0.826271	1.26217	-0.338606	1.01728	1.29112	1.02185	0.971208	0.760252	0.319441	0.125093	0.912091	1.24283	0.221248	0.579558	2.62096	0.314074	0.400929	2.27848	0.548323	0.955311	0.545773	0.740322	-0.0366696	0.716073	0.711941	-0.135879	0.675715	1.23794	0.932802	0.420062
UBB	1.25816e-07	-6.90027	6.09553e-06	0.91448	8.22216	6.714	7.1236	6.8755	6.21494	6.19431	6.55565	5.72041	5.54307	8.66178	5.95269	8.46323	6.50472	6.50472	6.50472	9.49666	6.54872	7.07256	8.24848	8.95955	8.15676	7.77269	6.34081	7.19853	7.19319	7.51076	7.31338	6.9719	7.93167	8.21168	8.78226	8.0722	6.67404	6.93512	6.18962	7.44493	6.68769	8.75315	7.05785	6.06423	8.83498	6.68614	8.74118	6.72627	8.20364
OSTC	1.29506e-07	-6.88771	6.25956e-06	-0.426699	3.25553	2.96978	3.21048	2.39508	4.22547	2.9281	3.66704	3.33169	2.68008	3.143	3.33081	3.36614	3.98319	3.98319	3.98319	3.43599	2.51674	3.93249	3.39745	3.74509	3.49929	2.98608	3.58746	3.55626	3.24461	2.60432	2.45989	3.71025	3.57457	2.36862	3.22197	3.00693	2.66092	3.44057	2.9275	3.21807	3.27597	3.21798	2.94284	3.20605	3.52839	3.47406	3.36323	2.98377	3.39253
MFSD13A	1.31486e-07	-6.88112	6.34032e-06	0.48705	4.32291	4.84035	4.32855	4.89976	3.50564	4.13449	3.76542	4.28267	4.47658	3.74903	3.58785	4.25853	4.09232	4.09232	4.09232	3.85655	4.57601	3.74786	3.71441	3.86676	3.51157	5.19036	3.33348	3.07703	3.75781	3.49478	4.46803	4.21578	4.25462	4.20522	2.93284	4.74095	4.40023	3.65256	3.42555	4.55987	3.99104	3.49596	3.89923	3.63291	3.80051	3.90336	3.45855	4.1504	4.01197
DERL3	1.31968e-07	-6.87953	6.34869e-06	-0.828802	2.4998	1.56982	3.3361	2.86661	4.43367	2.78227	3.34358	2.71156	3.43268	0.852958	3.8519	3.0572	2.24377	2.24377	2.24377	2.52588	0.367867	1.18504	2.34934	3.78547	2.87692	0.913827	3.79654	3.87032	2.09494	-0.169397	2.38657	3.52119	2.22918	1.25252	1.76547	0.751464	2.00693	2.83848	2.22035	2.26592	1.59528	2.14557	0.916732	2.63044	1.53286	2.61546	1.07561	2.90455	2.10335
NT5DC4	1.33438e-07	-6.87472	6.40439e-06	0.694475	1.94761	2.87728	1.33319	1.77284	1.7628	2.18193	1.01047	1.53559	1.78788	1.22234	0.856257	2.3206	0.369734	0.369734	0.369734	2.03188	2.07583	0.460646	1.44691	1.48012	1.3573	2.49309	0.91924	-0.0332443	1.05238	1.63384	1.81773	1.97613	0.763159	3.25048	-0.0967741	2.84623	2.2974	1.31818	1.3034	2.12725	2.39868	0.605793	2.17074	0.680507	0.520099	0.455068	0.968652	0.900503	1.58901
IGKV3D-11	1.39355e-07	-6.85588	6.67279e-06	-1.19256	-0.233376	-0.31076	1.19851	-1.01691	1.08235	0.102796	0.161121	-1.01559	-0.0815063	-2.46497	-0.730228	-1.42302	1.23716	1.23716	1.23716	-0.639594	-2.14142	-0.747372	0.082255	-0.0546725	0.877535	-1.49355	2.45311	-0.351229	-0.671591	-2.99184	-1.35796	2.71568	-0.13399	-0.766624	-1.08014	-3.18597	-0.181543	0.389154	-0.381909	-1.31484	-1.865	-0.55552	-1.57629	-0.703193	-1.51973	-0.699675	0.00458762	-0.230436	-1.3829
TNFRSF17	1.43724e-07	-6.84247	6.86601e-06	-1.1898	1.33662	-0.129198	1.48558	-1.01691	3.41927	1.52552	2.57167	0.374189	2.34066	-1.6763	1.73107	0.852711	1.84803	1.84803	1.84803	1.48366	-2.14142	0.419144	1.04823	2.6446	1.91459	-0.439553	2.68476	2.25278	0.635375	-0.599106	0.188828	2.24433	1.61644	-0.561643	0.400796	-1.77866	1.70084	1.7205	1.01048	1.14346	0.531452	-0.468967	-1.00357	1.0438	-0.077742	1.23421	1.26833	1.19494	0.313282
NKX3-1	1.442e-07	-6.84103	6.87277e-06	-0.871747	2.01388	2.89835	2.75066	0.766836	3.22248	1.13482	2.61291	1.57924	2.15002	0.817443	1.73107	3.95741	2.74184	2.74184	2.74184	2.03188	1.6563	1.55439	1.75893	3.46085	2.48704	1.13081	2.22856	1.09562	1.9938	-0.776423	2.26909	1.24576	2.10715	5.16049	1.43651	3.32708	1.55127	0.941605	1.56531	2.29212	2.62617	0.34414	0.152624	3.83914	2.61166	1.73734	-0.617553	2.15213	3.1581
SYNE2	1.46717e-07	-6.83352	6.97634e-06	0.444904	8.25657	8.3501	8.59778	8.14571	7.67772	8.05702	7.29231	7.56342	6.21014	8.06946	7.49444	7.31093	7.9277	7.9277	7.9277	8.32831	8.64446	8.87367	7.26712	7.40704	7.67933	7.86404	7.24444	7.28975	8.34902	8.52379	7.50635	7.48404	8.63521	7.39189	8.48061	8.09506	7.34936	8.38494	8.4052	7.47705	7.60531	8.65478	8.99366	7.85089	8.57517	7.66743	7.67822	7.3278	8.14574
CAPN3	1.47053e-07	-6.83253	6.97634e-06	0.329148	3.87375	3.4975	2.99374	4.14689	3.38322	4.29727	3.72837	3.5721	3.91622	3.68149	3.08781	3.4781	3.62882	3.62882	3.62882	3.33179	3.84905	3.66152	3.12008	2.99385	3.35686	3.67984	3.1263	3.31979	4.51717	3.41442	3.39852	3.52679	4.12646	3.87546	3.67334	3.39506	3.50065	3.50021	3.62434	3.65157	3.09771	3.98803	3.32452	3.48154	4.02935	3.8171	3.55413	3.62623	3.98178
H2BC10	1.48918e-07	-6.82705	7.04649e-06	-0.835362	2.68761	1.97884	3.28716	2.32363	4.38285	2.05218	3.62735	2.25375	3.22724	1.42472	3.12156	3.37902	2.9484	2.9484	2.9484	2.92424	-0.0288923	4.63624	2.83964	4.06021	3.13676	0.431807	3.19008	3.67891	1.92953	1.52322	1.95085	3.43447	2.87287	1.38234	1.57348	2.39353	2.47405	2.84617	1.9927	2.4283	1.81431	3.21144	3.04635	1.92277	1.10105	2.09698	1.83328	2.33243	2.56554
RN7SKP296	1.49217e-07	-6.82618	7.04649e-06	0.79635	2.70008	2.9396	1.67505	3.4229	1.58378	1.10241	-0.134015	0.102291	1.30321	1.27566	1.75277	2.05774	1.42056	1.42056	1.42056	2.17642	3.5976	0.913388	1.3755	2.24209	1.87713	4.36012	0.549489	1.5023	1.34296	3.02547	1.81773	2.00852	0.697016	4.48506	2.45404	2.25405	3.46763	1.31818	0.456392	1.94108	1.81431	3.12364	1.83305	0.476002	1.67491	1.25718	2.66096	0.964395	1.54249
STT3A	1.49736e-07	-6.82467	7.05478e-06	-0.366328	5.09963	5.19995	5.80938	5.13187	6.25954	5.03708	5.002	4.93941	4.55013	4.93218	5.33452	5.54504	5.24413	5.24413	5.24413	5.16906	4.28925	5.56398	5.058	5.25928	4.68955	4.54155	5.29592	5.16076	4.81865	4.80309	4.71639	5.5986	5.64215	4.49083	5.17531	4.64649	4.87339	5.27843	5.04625	5.02581	4.999	5.09813	4.68634	4.85788	5.12015	5.38702	5.1038	5.29071	5.0119
DOCK8	1.59124e-07	-6.79826	7.465e-06	0.36616	10.31	11.0241	10.3339	10.874	9.9758	10.4728	9.31956	9.08187	10.1343	10.2672	9.8036	10.2269	9.83033	9.83033	9.83033	10.0877	10.6196	10.0214	9.55043	9.63933	9.09666	10.4124	9.53294	9.08697	9.99613	10.4248	10.1073	10.3833	9.84498	10.1143	9.88465	10.5689	10.7831	9.81573	9.77275	10.3436	10.3269	9.96702	10.0701	9.58211	10.1085	10.1485	9.67672	10.2867	10.1682
CLEC7A	1.5917e-07	-6.79814	7.465e-06	0.43772	8.75747	9.35512	7.82746	9.13503	8.38288	8.60856	7.7205	6.79455	8.25877	8.71628	8.2657	7.84414	8.34545	8.34545	8.34545	8.32007	8.95457	8.12346	8.27815	8.28467	8.1908	9.40539	8.02529	7.50923	8.68355	9.01578	8.57842	8.83127	7.97622	9.44372	8.14285	8.93161	9.25495	8.11037	7.56551	8.95008	8.93799	8.73859	8.6137	7.24318	8.55291	8.49194	8.20006	8.47949	8.6804
LINC01270	1.61874e-07	-6.79082	7.56478e-06	0.772069	5.71313	5.77218	4.70593	6.05152	6.49382	3.81258	3.56146	3.0966	6.91423	4.20573	5.51837	5.65897	3.96033	3.96033	3.96033	6.46142	5.84756	4.70476	4.58025	6.01006	4.19873	6.0482	4.19137	3.54196	5.23896	5.64335	5.52739	5.82911	3.35623	6.49851	4.4417	5.36688	6.64757	4.60061	4.34921	5.71304	5.16935	4.74448	4.68634	3.27081	2.67221	5.2463	5.22106	5.08154	4.70115
ANKS1A	1.62034e-07	-6.79039	7.56478e-06	0.512101	6.07841	6.58346	5.69365	6.74227	5.51627	6.01547	5.19087	5.20971	6.1033	5.78697	5.45855	5.78284	5.58235	5.58235	5.58235	5.62933	6.31491	5.41755	5.03308	5.35898	4.78619	5.8232	5.00077	4.80941	5.36985	5.88804	5.72622	5.9149	5.51675	6.17928	5.67024	5.83141	6.85491	5.25698	5.33941	5.79206	5.66552	5.7272	5.33387	5.18773	5.60809	5.84303	5.60122	5.87246	5.47673
CCNB1	1.63528e-07	-6.78641	7.6172e-06	-0.694881	2.20334	0.831326	2.16497	1.94937	3.80717	1.85228	2.81727	2.47786	1.96381	0.583763	2.38727	2.68445	2.34806	2.34806	2.34806	1.93359	-0.0288923	4.55713	2.47991	3.27481	2.24382	0.854068	2.64738	2.80907	1.69192	1.44447	2.09591	2.83785	2.78539	0.48072	1.62843	1.97191	1.96022	1.95172	2.11101	2.15607	2.25636	2.28908	3.09545	1.59208	1.10105	2.20725	1.10957	1.48364	2.33933
SLC35F2	1.70351e-07	-6.76865	7.9171e-06	-0.536162	2.06286	1.83323	2.95248	2.28652	3.31469	1.87164	2.52922	2.95466	1.74996	1.76016	2.5695	2.50811	2.23291	2.23291	2.23291	2.33884	1.06232	3.25868	2.37398	2.63579	2.66245	0.726571	2.88431	2.62241	2.32886	1.36117	2.16331	2.28455	2.58663	1.10984	1.79779	1.62084	1.5194	2.48205	2.4572	1.90757	2.2289	1.52008	2.52834	2.47422	1.72477	2.18346	1.70587	2.00798	2.26965
IGHV5-10-1	1.73165e-07	-6.76154	8.01947e-06	-2.31618	1.71776	3.27385	-3.24468	2.7351	5.98371	2.15057	3.51	1.1578	3.09738	-4.34055	3.13815	2.97477	2.63043	2.63043	2.63043	-4.34055	-4.34055	0.651936	-4.34055	-3.5159	2.38397	-4.34055	4.23486	2.96006	-4.34055	-0.599106	2.38657	4.11528	-4.34055	0.384825	-0.220784	-1.08001	3.31819	5.62728	3.21856	-3.41989	-4.34055	-4.34055	-0.594696	-4.34055	0.82446	-4.34055	-0.410854	-4.34055	1.87837
FAM98A	1.7365e-07	-6.76032	8.01947e-06	-0.311324	3.69553	3.86709	4.43722	3.54574	4.60258	3.68705	3.74331	3.73051	3.09738	3.97537	3.80594	3.49002	4.14828	4.14828	4.14828	3.5859	3.39368	4.34912	3.80779	3.44076	3.73743	3.25225	4.0695	3.67455	4.13082	3.02547	3.39852	4.10033	3.9858	2.62096	3.40094	3.7338	3.55667	4.07493	3.8146	3.80503	3.54447	3.32481	3.90711	4.04136	4.14678	3.92504	3.46512	3.64097	3.90112
MIR7848	1.73725e-07	-6.76014	8.01947e-06	0.606983	2.76523	3.07534	1.95121	2.22902	1.85343	2.21263	1.76284	0.762862	2.53155	2.12222	2.0618	2.66355	2.09583	2.09583	2.09583	2.70341	3.65457	1.92433	1.44691	2.35372	1.73777	3.86531	1.93793	0.674275	2.07527	3.23886	1.54194	2.68596	1.54304	3.49973	1.21508	2.45851	3.87896	2.1633	1.70564	2.97285	2.73752	1.85811	2.65539	1.94939	1.12601	2.68488	1.59036	2.09618	1.91535
IGHG2	1.75238e-07	-6.75637	8.07118e-06	-1.21177	6.25918	4.63596	8.12914	5.2304	8.52011	7.22568	5.55799	4.95399	6.75705	2.5368	8.18094	6.70184	5.2656	5.2656	5.2656	6.92504	1.79175	5.20659	4.78931	4.88676	4.26549	5.83291	7.10767	7.07945	5.27605	2.45161	5.49723	8.03881	6.21389	4.1516	6.01935	1.15589	5.76074	6.36099	5.03963	6.21735	4.94729	4.81086	0.947621	6.73647	4.70165	5.57815	5.83105	7.0759	6.07348
ADORA3	1.83286e-07	-6.73687	8.42297e-06	0.887145	1.78779	3.88831	0.538938	-0.0908156	0.668531	0.166893	-0.654097	1.44412	2.61829	1.66346	0.00765148	1.47332	2.1196	2.1196	2.1196	1.20899	2.60347	1.37066	0.14085	1.37819	0.273887	0.658332	0.377539	-0.0914801	0.739012	0.58498	0.865037	-0.085489	0.0182261	2.77075	0.66886	0.187498	2.07429	0.758324	-0.312556	0.455912	1.11497	0.894043	1.86576	-0.275732	1.28954	0.494266	0.541017	0.350518	1.28434
MGAT4B	1.87839e-07	-6.72621	8.61293e-06	-0.38379	5.39712	4.75049	6.0287	6.3613	5.39177	5.48182	5.20577	5.35177	5.09112	4.95279	5.56971	6.07167	5.18762	5.18762	5.18762	5.88741	5.05329	5.03003	5.98679	6.24972	5.27629	4.88916	4.84934	6.45313	4.75826	5.02229	4.76059	5.76421	5.54758	5.50358	5.41424	5.02461	6.13658	4.92649	5.02965	5.65491	4.65666	5.58524	4.57452	4.88916	4.90094	5.20259	5.65683	5.95243	5.46898
TSPAN14	1.8999e-07	-6.72127	8.69216e-06	0.362621	8.53292	9.31869	8.5875	8.41242	8.0102	8.52772	7.86661	7.68921	8.67638	8.61955	7.87506	8.5412	8.33407	8.33407	8.33407	8.22067	9.17867	8.09389	8.09184	8.00518	7.67354	8.90542	8.00234	7.78737	7.91482	8.41214	8.13749	8.36675	8.15302	8.68239	7.84815	8.2758	9.07926	8.20918	8.05547	8.41392	8.78482	7.83572	8.27392	7.79969	8.109	8.47045	8.02816	8.2229	8.14696
NAIPP3	1.913e-07	-6.71828	8.73264e-06	0.735777	4.56042	4.76203	3.55174	5.00628	4.09038	3.73541	3.30887	1.8347	4.31717	3.26666	3.98621	3.84589	2.98768	2.98768	2.98768	3.74506	4.90963	3.87609	3.98616	3.65642	3.09657	6.26877	3.64549	1.68686	3.76396	5.34039	4.57915	4.62378	3.42254	4.69205	2.27046	4.76362	5.11911	3.75813	3.40511	4.95378	4.62541	3.52789	4.22021	2.98586	4.05881	4.50484	2.82325	4.33695	3.58842
IGLV3-21	1.91977e-07	-6.71675	8.74409e-06	-1.41982	3.53743	2.18156	4.11612	2.65003	5.68618	2.82262	4.16258	2.50074	3.80042	0.0223631	3.53872	2.89633	2.15454	2.15454	2.15454	3.01355	-1.66518	2.36777	3.40942	3.89656	2.77876	1.48614	4.3323	5.53015	2.80546	0.345927	2.95436	4.69266	2.58663	1.54646	2.07334	-0.483742	3.68432	3.89405	2.55322	3.45685	1.17375	3.81771	1.12023	3.57852	2.25242	3.68781	3.01464	4.67915	3.18106
H4C12	1.95122e-07	-6.70969	8.86769e-06	-0.533891	1.46611	0.831326	1.42654	0.870759	1.40355	2.60851	2.01747	1.34645	1.71102	0.355183	1.79522	1.88795	0.92276	0.92276	0.92276	0.535949	2.38828	1.49571	1.64209	2.02991	2.02148	2.62409	2.03374	1.5023	1.74268	0.96947	1.47278	2.00852	1.18921	0.917625	1.43651	1.43957	1.72898	1.15457	1.4503	2.53089	1.65839	1.38716	1.06496	1.39314	0.48195	2.34227	1.26833	1.8813	1.36675
ERLIN1	2.06599e-07	-6.68487	9.36857e-06	0.849363	5.87426	7.40771	4.62946	7.25261	4.68386	4.74329	4.97378	5.28084	6.19434	4.81776	4.33088	5.30301	4.74534	4.74534	4.74534	5.11178	6.30443	4.94119	4.37893	5.16601	3.81377	6.73935	4.31333	4.07942	4.15445	4.93136	4.45015	5.42052	4.73156	6.23964	4.06724	5.91483	7.92509	4.36693	4.22934	5.70087	5.01315	4.60928	4.38724	4.11081	4.39279	5.43314	4.59371	4.88301	4.36928
SDR42E1P5	2.07621e-07	-6.68273	9.39417e-06	1.17942	1.69802	1.91823	1.23338	2.62052	-0.49533	-0.268947	0.854157	0.55995	2.46289	-0.0414162	-0.407843	-0.18213	-0.465944	-0.465944	-0.465944	0.365464	1.75433	-0.845121	0.082255	-0.23679	-2.0431	2.25971	0.643609	-1.82969	-2.16556	0.852335	2.09591	1.78373	-1.40001	1.99923	-1.8343	2.8822	2.78673	-1.21338	-1.50758	0.670869	1.0537	-1.08908	-0.0159224	-0.87937	-2.32876	0.774552	-0.510505	0.350518	-0.0646613
DHX58	2.12825e-07	-6.67198	9.60845e-06	0.921353	6.28699	6.76006	5.91786	5.25221	4.48277	7.08347	5.36872	5.11465	6.59406	6.73252	5.53098	4.3431	5.87372	5.87372	5.87372	3.2111	6.82793	5.95463	5.7055	3.47573	5.6061	6.11655	5.46121	3.6876	6.73842	4.62706	5.78089	5.64311	5.51115	3.66194	3.37975	7.39908	6.33271	5.85567	5.46939	5.23444	6.47484	3.65378	5.87772	5.99883	6.75912	5.40642	3.02357	5.70022	6.17418
SPCS2	2.15535e-07	-6.66648	9.70947e-06	-0.271838	4.63714	4.64534	4.81929	4.79798	5.46258	4.49438	4.50906	4.14421	4.41127	4.6155	4.86695	4.71979	4.94313	4.94313	4.94313	4.6339	3.99656	5.02139	4.62712	4.64923	4.72425	4.67705	5.10922	4.92958	4.66923	4.34215	4.07755	5.17338	4.75207	4.36454	4.46956	4.25201	4.81552	4.66718	4.42731	4.73484	4.61485	4.74675	4.52162	4.80785	4.70786	4.73907	4.55418	4.56013	4.4534
NUDT16P1	2.17154e-07	-6.66323	9.76101e-06	0.687863	4.47612	5.68239	3.01393	4.67058	3.48878	4.73538	3.54024	2.38252	4.64098	4.23631	2.61761	4.14626	4.11615	4.11615	4.11615	4.04724	5.43958	3.48672	3.75718	3.96848	4.06351	4.62437	4.02647	0.638893	3.17239	3.91556	4.00592	4.60272	3.94126	5.15505	2.70471	5.35626	6.04861	3.42526	2.9131	4.24809	4.79648	3.66339	3.79693	3.1838	4.37208	2.83747	3.983	4.04722	4.11888
IGLV10-54	2.17701e-07	-6.66214	9.76423e-06	-1.36456	-0.168114	2.35927	1.8649	-2.05893	1.6048	2.5131	-0.654097	-1.87836	1.54381	-2.15173	0.49347	-1.83402	-1.18462	-1.18462	-1.18462	0.172097	-4.34055	-2.9725	-0.690032	0.543596	0.536715	-2.99075	0.581549	1.01512	-1.5624	-4.34055	0.099877	-0.0187021	-1.98753	-2.84583	-0.356465	-2.55295	-1.20575	-0.367794	-1.85666	-0.324352	-4.34055	-1.94503	-1.57629	-1.31333	-0.259691	-1.36153	0.490361	2.67559	-2.05729
PCBP1-AS1	2.20235e-07	-6.65711	9.85634e-06	0.635034	8.57823	8.61409	7.43059	9.50065	8.52149	8.82592	7.21239	6.94133	8.59551	8.25885	8.10468	8.35149	7.73486	7.73486	7.73486	8.45507	9.3667	7.65064	7.21906	8.03814	7.47899	8.51476	7.93801	6.91586	8.07287	8.04811	8.11568	8.18144	7.50656	9.79422	7.37198	9.0654	9.52749	7.99676	7.77517	8.88862	8.94592	8.04599	9.05357	7.42843	7.84327	8.14523	7.91629	7.67134	8.43631
ZNF552	2.2094e-07	-6.65573	9.8664e-06	0.401735	3.63761	3.70908	3.01393	4.01702	3.59766	3.10212	3.29879	2.24022	2.97123	3.45178	3.20264	3.38541	3.1349	3.1349	3.1349	3.91439	4.03996	3.17389	2.5786	3.48066	2.72705	4.1649	2.84522	2.25278	2.99534	4.39546	3.22009	3.49857	2.51165	3.82611	3.70777	2.83403	4.00514	3.14291	2.71973	3.78211	3.2143	3.94926	3.44848	3.01135	3.21617	3.56891	3.45194	3.44214	3.15037
AC093849.4	2.26728e-07	-6.64449	1.01029e-05	0.823325	3.43969	5.1893	2.67658	1.87634	2.09546	2.43716	1.87557	2.60999	3.67451	3.21982	1.21006	1.92355	2.89431	2.89431	2.89431	3.32405	4.53247	1.98248	1.90132	1.91812	1.85802	3.21711	2.38208	1.42132	1.7674	2.45161	2.97951	2.5822	2.59271	4.46468	2.44386	3.69387	4.37819	2.51133	2.33285	2.61633	3.63092	2.95386	2.06202	1.83983	2.492	3.16956	3.11836	2.17931	2.36629
CLSPN	2.29107e-07	-6.63996	1.01786e-05	-0.532721	2.57263	1.5433	2.58506	1.99609	3.67921	2.28662	2.93251	3.59355	2.75856	1.53815	2.58168	2.97477	2.44532	2.44532	2.44532	2.39902	1.99792	4.9246	2.54645	3.34674	1.93296	1.36291	2.95332	2.42883	2.26084	1.22643	3.51491	3.03936	3.35623	2.23749	2.3489	2.34279	2.75971	2.50164	2.53452	2.59544	2.73752	2.21257	3.20177	2.32973	1.51408	2.55186	1.87336	2.41478	2.84968
ISOC2	2.29418e-07	-6.63937	1.01786e-05	-0.421966	2.66364	2.43334	2.7017	2.06343	3.61331	2.54963	3.14422	3.48299	3.51411	2.26088	3.14637	3.00831	2.74184	2.74184	2.74184	2.7846	1.38966	3.3772	2.94205	3.44076	3.1912	2.5507	3.12086	3.5937	2.7692	1.07781	2.51253	2.83785	3.07736	1.99923	2.33795	1.9267	1.78366	2.68416	2.31104	2.46332	2.459	2.61057	2.4442	2.58871	2.89905	2.32063	2.97834	2.82073	3.11106
NCOA7	2.32916e-07	-6.6328	1.03115e-05	0.716323	6.63431	7.05513	6.5975	6.78363	5.52181	7.17008	5.75229	5.71185	5.95078	6.98097	5.64707	5.44908	6.19436	6.19436	6.19436	5.57982	6.50433	6.51294	6.07301	5.04649	5.94849	6.20442	5.61434	5.23817	6.90017	5.58718	5.59811	5.9601	6.07377	4.81212	5.24436	7.62952	7.15175	6.21288	5.42693	5.96693	6.64872	5.0999	5.58536	6.07636	7.06155	5.85154	5.08898	6.0486	6.17131
LGALS9	2.34962e-07	-6.629	1.03797e-05	0.571677	8.12586	9.15828	8.2567	7.60596	7.13042	8.77349	7.21742	7.09254	7.88088	8.35585	7.4009	6.83046	7.99571	7.99571	7.99571	7.19754	8.21895	8.04164	7.99565	6.51764	7.4301	8.52856	7.15171	6.55866	8.4265	7.52399	7.728	8.05416	7.71065	6.91639	7.11091	8.55049	8.23482	7.63731	7.31909	7.56665	8.07067	7.21692	7.65204	7.5804	8.86794	7.45878	6.80733	7.50307	8.10331
MKNK1	2.39043e-07	-6.62152	1.05374e-05	0.630492	8.15285	8.13834	7.10724	8.94163	7.32033	7.43213	7.02384	5.64024	8.92606	7.21306	7.6329	8.14602	7.19807	7.19807	7.19807	8.43231	8.60657	7.07005	7.0358	7.18391	6.85341	9.21957	7.26556	6.26577	7.22756	8.95271	8.12028	7.76501	6.60996	8.60421	6.67064	8.01664	8.96653	6.83685	6.77326	8.22218	7.76884	7.03866	7.11041	6.76297	6.54223	8.17814	7.21134	7.70942	6.90731
NT5M	2.41409e-07	-6.61725	1.06189e-05	-0.755054	3.29895	1.40289	2.75066	4.02267	2.78026	3.62565	3.46566	3.4063	3.52538	3.73005	3.46176	4.09645	2.52758	2.52758	2.52758	4.62448	2.60347	1.73437	4.9779	4.57284	4.16026	2.62409	3.16913	4.65857	2.13349	1.56105	2.94161	4.10408	3.40539	3.24366	3.78638	3.13172	4.82858	2.45215	2.99744	4.52439	3.75159	2.78802	0.977862	2.8082	2.13441	2.74299	2.76051	4.32179	3.84473
AC136475.9	2.41933e-07	-6.61631	1.06192e-05	0.990852	4.41785	3.83466	3.06322	3.72974	4.14163	3.98694	3.34358	2.45461	5.58136	4.21258	4.60292	3.18735	2.52758	2.52758	2.52758	2.57887	5.29885	3.0838	2.13547	2.86411	3.58892	5.44195	3.13713	1.12148	3.50198	2.74241	4.56676	3.97484	0.763159	3.96108	-0.587399	5.18442	5.46697	3.8565	3.13414	4.79792	5.02317	-0.745959	4.50873	2.3697	3.45644	4.05852	-0.510505	4.46671	2.90588
KPNB1	2.42645e-07	-6.61503	1.06277e-05	0.48471	8.78556	9.51546	8.82409	9.0982	8.38801	9.04387	7.66227	7.46032	8.63732	8.96883	8.39488	8.56146	8.27278	8.27278	8.27278	8.48856	9.37105	8.43785	8.0473	8.11244	7.6189	9.2264	8.14879	7.02866	8.34235	8.41634	8.58509	8.67675	7.85949	8.49667	7.94895	9.28159	9.48725	8.20247	8.04993	8.9404	9.1719	8.12203	8.48817	7.85419	8.63139	8.66484	7.72826	8.74052	8.20458
CALM2	2.49089e-07	-6.60365	1.08868e-05	0.399964	7.31872	8.41757	6.61413	7.07022	6.82584	7.13795	6.77407	6.5505	6.7183	7.35568	6.81958	7.0304	7.39961	7.39961	7.39961	7.23051	7.29627	7.0863	6.69324	7.06797	6.98305	7.82469	6.7587	6.61438	6.92029	7.26438	6.67833	7.35894	6.76731	7.37132	7.14311	7.31823	7.96999	6.66562	6.39987	7.05749	7.16108	7.56791	6.73826	6.53372	7.48993	6.83622	7.44625	6.75816	6.75754
IL27	2.50534e-07	-6.60113	1.09267e-05	0.758766	2.244	2.59697	1.39609	3.16119	0.820048	1.87164	1.59188	1.44412	2.3908	1.49384	1.59353	0.65514	1.47686	1.47686	1.47686	1.89231	1.94907	1.55439	2.01533	0.817284	1.4367	3.8501	1.12903	0.319441	2.27814	1.95117	2.02521	1.53968	1.26726	0.334376	-0.220784	2.97396	2.15946	1.17911	0.495591	2.61633	2.11353	-0.468967	1.34569	0.993522	2.51107	1.99134	-1.1489	1.97734	1.1039
AC106782.5	2.54686e-07	-6.594	1.10842e-05	0.51991	0.184373	-0.217125	-0.85039	0.595407	-0.49533	0.597337	-0.505476	0.374189	0.56803	-0.251646	-0.507509	-0.341992	0.245608	0.245608	0.245608	-0.639594	-0.239227	-0.655828	-0.179288	-1.09534	0.384827	-0.29724	0.0961325	-0.424194	-0.544436	-0.441216	0.498206	-0.772943	-0.259714	0.384825	-0.429412	-0.258136	0.479236	0.11168	-0.183114	-1.02879	-0.295269	-0.236686	-0.686571	-0.788594	0.442764	-0.0656384	-0.14755	-0.0303692	-0.385974
LY86-AS1	2.6337e-07	-6.57943	1.14379e-05	0.790806	2.07181	2.62253	2.01272	2.69319	2.25025	1.64286	1.45343	2.59943	2.43926	0.625433	1.5195	0.696878	0.329533	0.329533	0.329533	2.75036	1.34001	-0.139434	1.24803	2.09562	1.15303	2.00881	1.08497	0.775495	1.43843	0.912091	3.70785	2.08643	0.627694	2.078	0.123226	1.40702	2.3527	0.852873	1.3682	1.87327	1.11497	0.645135	1.32231	0.476002	1.04982	0.709419	0.683114	0.799024	1.69913
EPCAM	2.64469e-07	-6.57763	1.14614e-05	1.1476	-0.393824	0.0320472	-4.34055	-2.50268	-1.48448	-1.54763	-0.134015	1.60058	0.948865	-2.46497	-1.31633	-0.727252	-3.05441	-3.05441	-3.05441	-1.91688	-0.485548	-2.28312	-0.690032	0.00125978	-2.77595	-0.29724	-0.568663	-0.351229	-2.16556	-2.99184	0.631119	-1.65612	-2.99524	1.16861	-1.48419	-1.77866	0.411399	-2.05704	-1.36033	-1.89036	-1.865	-2.9051	-0.889987	-0.788594	-2.32876	-3.52093	-0.996625	-1.93965	-2.05729
FEN1	2.6641e-07	-6.57445	1.15213e-05	-0.594223	1.89558	1.34266	2.82111	1.22465	3.21567	1.06925	2.48548	2.50074	1.35465	1.66346	2.27177	2.27998	2.3278	2.3278	2.3278	1.53819	0.678717	3.73946	1.7017	2.50648	1.79915	-1.21229	2.01038	2.74395	2.07527	0.789996	2.51253	2.43509	2.30515	1.35729	1.57348	1.33961	1.70084	2.1633	1.90806	1.87327	2.02052	1.84127	2.74604	1.54049	1.41633	2.01849	1.20691	1.68669	1.98658
DNAJA4	2.68139e-07	-6.57164	1.15717e-05	0.759044	5.20405	4.00949	5.04949	4.3358	3.74224	4.36373	4.1764	4.08488	3.1124	6.1916	3.3874	5.59004	4.52942	4.52942	4.52942	6.42661	3.93935	5.06577	5.15714	5.18425	4.30482	4.49829	3.92079	4.81338	5.14775	4.29242	4.35726	4.28351	5.81777	4.92083	5.47046	5.00843	2.91475	4.4995	3.91921	4.0778	5.43115	4.81518	4.67485	3.92212	5.52258	4.4782	4.80536	4.46946	5.02465
AC136475.5	2.70191e-07	-6.56833	1.16358e-05	0.901801	5.27617	4.68226	4.17559	4.54661	4.94107	4.65665	4.07676	3.01947	6.45957	5.14233	5.41838	4.25154	3.7518	3.7518	3.7518	3.83493	6.18471	4.21004	3.70474	4.09917	4.78619	6.44367	3.98812	2.32134	4.59174	3.58015	5.33618	4.96434	2.01966	5.15868	1.11602	6.11832	6.2538	4.67367	4.04014	5.51868	5.86597	1.41018	5.44087	3.55705	4.30811	4.93876	0.490361	5.21229	3.65005
AC122718.2	2.76984e-07	-6.55755	1.18828e-05	0.353491	2.55537	1.85495	1.7249	3.03266	2.32817	1.94659	1.19559	1.09904	2.46289	2.39943	1.70904	2.29365	1.93098	1.93098	1.93098	2.80698	2.37601	1.81658	1.79587	1.96106	2.27296	3.42649	1.84853	1.61584	2.39382	2.91298	2.65984	2.72546	2.01966	2.62096	2.29331	2.45851	2.80006	2.07453	1.70564	2.85476	2.30975	2.7792	1.98966	1.73663	2.59389	2.71007	2.2382	2.79461	2.19642
CD38	2.77085e-07	-6.55739	1.18828e-05	-0.486476	5.95972	5.49967	6.90245	5.56265	7.17722	6.21341	6.25516	6.23628	5.61339	5.55192	6.04902	5.54218	6.28518	6.28518	6.28518	5.4202	5.10623	6.92284	5.64225	5.59084	6.34563	5.46959	6.38349	6.74595	6.81231	4.67528	5.92865	6.29724	6.46513	4.49371	5.51123	5.94915	5.33588	6.46257	6.40051	5.89395	6.12806	4.97424	6.39313	6.43475	5.90966	6.05039	5.09746	5.94651	6.66557
SLC31A2	2.79095e-07	-6.55425	1.19441e-05	0.606337	6.70488	7.79458	5.6795	7.10726	5.6525	6.19431	6.01557	6.311	6.35452	6.25188	5.67006	5.80806	6.29173	6.29173	6.29173	6.74403	7.10885	6.02462	5.16422	5.77959	5.63164	7.3354	5.35508	5.54336	5.87256	6.22343	5.62026	6.47795	6.00879	8.03513	6.54953	6.33607	7.30039	5.16937	4.65862	5.80235	6.20669	7.31623	6.16491	4.85261	6.95287	5.31222	6.78189	5.91452	6.14528
GUCD1	2.79934e-07	-6.55294	1.19551e-05	0.583164	7.41812	6.94614	6.89021	7.4574	6.36727	6.76154	6.30004	6.48316	6.80175	7.79516	6.46844	7.72343	6.70948	6.70948	6.70948	8.44908	6.50644	6.85638	7.01147	8.02429	6.90667	7.60154	6.58573	6.9831	7.06754	6.87529	6.87627	6.82281	7.20078	7.71728	8.18432	7.0555	7.23812	6.33666	6.13325	7.13509	6.53562	7.65811	6.3648	5.89482	7.31618	6.51564	8.22666	6.85878	7.29132
AC009495.3	2.87663e-07	-6.54112	1.22597e-05	0.583887	2.97997	3.19939	2.16497	2.46316	2.20965	3.19727	2.14665	1.29502	2.61829	2.5368	1.97214	2.99164	2.72644	2.72644	2.72644	2.08779	3.5383	1.99665	2.164	2.32113	2.70584	3.95338	2.52082	0.70881	2.7569	3.09158	3.01643	2.41107	1.92652	2.39347	0.92441	4.13264	3.67711	2.30383	2.5439	3.23167	3.26249	0.957927	3.19535	1.69004	2.1096	2.58855	0.931161	1.97734	2.2408
H2BC14	2.88646e-07	-6.53963	1.22761e-05	-0.845952	3.74546	2.8232	4.88106	3.4229	5.35191	3.18958	4.89238	3.23948	4.38677	1.77875	4.53252	4.56781	3.99929	3.99929	3.99929	3.71578	0.210975	5.57228	4.06393	5.06301	4.2835	1.8948	4.49474	5.05568	2.9636	1.6689	3.31206	4.6471	4.04461	2.67264	2.94732	2.39353	3.70571	4.04853	2.92032	3.35488	3.2143	3.75615	4.05273	3.07318	1.90856	3.16349	2.54164	3.36139	4.07869
LARP1P1	2.90408e-07	-6.53699	1.23048e-05	-0.744293	1.86114	1.69554	1.8649	1.82552	2.27669	3.30801	2.41262	1.09904	2.36595	0.665934	2.9537	2.97477	1.43957	1.43957	1.43957	1.10445	2.7721	0.75561	2.53557	1.59363	1.98672	2.18891	3.36145	1.24429	2.34537	1.48438	2.4237	2.99964	0.22011	1.89865	0.0712903	2.34279	3.62565	1.95172	1.68883	2.63693	3.01975	0.48089	1.43559	2.55444	-0.395134	3.47406	0.00458762	2.58703	1.58901
PLB1	2.90517e-07	-6.53683	1.23048e-05	0.914986	6.35456	6.40721	4.92171	6.99746	5.42908	4.10617	4.7628	3.65093	6.35452	4.3338	4.88426	5.71717	4.57956	4.57956	4.57956	6.6419	6.41647	4.02184	6.27863	5.58742	4.48373	8.09415	5.62496	4.61599	4.68553	7.4159	6.89952	6.48011	4.38462	6.11816	3.93545	5.30639	6.01329	5.12742	3.56107	6.85596	4.83341	5.70875	4.40126	4.18269	4.9559	6.10838	5.23266	6.04399	4.10694
NCKAP1	2.94878e-07	-6.53036	1.24638e-05	-0.456764	3.38302	1.74291	4.45948	4.09955	3.31469	3.43709	3.51	4.07729	2.53155	2.97587	3.62362	3.53674	3.32581	3.32581	3.32581	3.53987	3.53278	2.63577	3.9124	4.3104	3.83835	3.43671	3.29048	4.01533	2.54446	3.01188	3.4976	4.33549	3.98349	3.20908	2.58944	3.18069	4.34675	3.31332	3.31485	3.66667	3.58293	2.85666	3.05347	3.45392	3.08869	3.28583	3.47166	3.71248	3.36606
FBXO5	2.96882e-07	-6.52742	1.25227e-05	-0.502118	2.22963	1.89744	2.73857	1.40856	3.24275	1.54977	3.07508	2.5564	1.9303	2.12222	2.60573	2.22398	2.80184	2.80184	2.80184	1.99336	0.830266	3.9689	2.36171	2.49679	2.60632	1.07955	2.48736	2.76051	2.64127	0.852335	2.22771	2.41107	2.61676	0.882943	1.93489	2.03719	1.38438	2.63179	2.35434	1.98992	2.3863	2.0462	3.08854	2.537	2.08436	2.15928	1.79204	1.96177	2.07094
APH1B	3.00776e-07	-6.52176	1.2648e-05	0.422462	5.41865	5.32585	4.84488	5.59526	4.70105	4.87384	4.96585	4.40597	5.93819	5.30022	4.90622	5.12335	4.95143	4.95143	4.95143	5.28123	5.50159	4.95215	4.37589	4.91798	4.62603	6.07625	4.83445	4.39522	4.37157	5.7577	5.05192	5.416	4.54988	6.27935	4.71354	5.18202	5.98586	4.70358	4.77272	5.59565	4.4611	5.43621	4.77081	4.6944	4.79407	5.10626	5.23459	5.31542	4.97077
FGD2	3.01195e-07	-6.52115	1.2648e-05	0.46367	6.83381	7.5182	6.55334	6.60962	6.03495	7.31414	6.68841	7.14386	6.34977	7.00484	5.93737	5.59142	7.09205	7.09205	7.09205	6.08808	6.69414	6.88571	6.05694	5.93127	6.10252	6.5008	5.42963	6.22161	7.18231	6.00414	5.68285	6.11777	7.61147	6.34293	6.9075	6.28099	4.74837	6.34955	5.87816	5.8137	6.2821	6.33897	5.92408	6.28081	8.13765	6.43861	6.77728	6.52249	7.10532
FAR2	3.017e-07	-6.52042	1.2648e-05	0.646449	6.35918	6.29349	5.25647	6.2221	5.75832	6.09793	4.77557	4.14421	5.44859	5.52877	5.25691	5.58031	5.52677	5.52677	5.52677	6.13085	6.09961	5.95554	5.30219	5.29469	5.3703	6.85056	5.4698	4.99925	5.65463	5.85226	6.14556	6.4561	4.91853	6.9276	6.10498	7.22733	7.40056	5.02792	4.45492	6.14011	6.01506	6.35685	5.93375	4.63209	6.37926	5.16513	6.07832	5.84938	5.63613
SLC35B1	3.03995e-07	-6.51713	1.26975e-05	-0.241595	4.34584	4.61701	4.7756	4.55444	4.85595	4.20106	4.38123	3.90789	4.35555	3.84915	4.53566	4.51045	4.42598	4.42598	4.42598	4.41823	3.66469	4.52571	4.38803	4.6536	4.37033	4.2192	4.54032	4.66957	4.11164	4.43673	4.18956	4.55144	4.5199	3.94015	4.21815	4.26114	4.4644	4.31251	4.09541	4.43608	4.00325	4.53792	4.22336	4.21046	4.44578	4.34517	4.28743	4.38444	4.37261
CEP55	3.04118e-07	-6.51696	1.26975e-05	-0.770687	1.22788	-1.05335	0.969512	1.26335	2.66488	-0.0346308	2.1909	2.08232	1.86085	-0.32913	1.73107	1.83286	1.78996	1.78996	1.78996	0.826271	0.793845	3.8529	1.22112	1.78105	1.05578	0.258256	1.80845	1.31324	0.338127	-0.169397	0.865037	2.05577	1.56792	-0.0121473	0.482599	1.43957	0.930739	1.05201	0.71075	1.22733	1.25766	0.926339	2.01904	0.280205	-0.711413	0.709419	0.00458762	0.83365	0.566733
LINC01358	3.15544e-07	-6.50094	1.31479e-05	-0.564613	1.19828	0.308835	1.56985	0.329661	2.51745	1.25765	1.87557	2.53439	1.45233	0.198349	1.77415	0.852711	1.42056	1.42056	1.42056	1.24223	1.06232	1.6291	1.55858	1.8282	1.87713	0.258256	2.07936	1.68686	0.969573	0.256548	2.59622	1.60467	1.3268	1.07953	0.633482	1.03326	0.186351	1.96589	1.3034	0.501542	1.20227	0.605793	0.751515	1.79651	0.762156	1.03595	0.0750347	0.900503	0.897613
AK4	3.17411e-07	-6.49838	1.31989e-05	-0.478905	1.4111	1.91823	1.33319	2.77583	1.58378	1.64286	2.15784	3.25974	1.49879	1.42472	1.59353	1.21061	1.36198	1.36198	1.36198	1.14014	1.69631	1.75119	1.98366	1.71568	1.18404	1.59966	1.63598	1.24429	1.16831	0.656605	2.4952	1.60467	2.00151	1.35729	0.358086	2.21697	1.72898	0.852873	1.34692	2.33056	1.81431	1.33999	0.977862	1.43141	0.884184	0.925576	0.541017	0.799024	1.28434
BYSL	3.3043e-07	-6.48092	1.37098e-05	-0.433774	1.45373	1.37309	1.48558	0.766836	1.9387	0.501159	1.6245	1.98831	1.35465	1.62289	1.93466	1.77558	1.81929	1.81929	1.81929	1.8281	1.41387	2.65377	1.95129	1.8588	1.5362	1.18031	1.08497	2.0387	1.7674	0.852335	1.63985	1.53968	1.89736	0.526378	1.62843	1.03326	1.19562	1.84841	1.47011	1.30659	0.989706	1.98619	0.885168	1.57509	2.14665	1.86245	1.38384	1.66762	1.72019
CTBP2P8	3.31195e-07	-6.47992	1.37098e-05	-0.662886	2.35049	3.02831	3.83889	2.24845	3.58714	1.83265	1.03495	-0.479428	2.55373	1.7971	2.50703	3.34004	2.79447	2.79447	2.79447	4.23641	3.005	-0.202818	2.33687	1.61171	1.93296	1.5628	2.79825	2.31013	0.926314	3.54283	1.57532	2.52738	1.35567	2.79893	4.06392	1.56291	3.53293	1.68667	2.6345	1.52117	2.03644	2.4861	2.42237	1.97553	0.133874	2.68488	2.45183	3.53975	2.15064
IGHG1	3.31699e-07	-6.47926	1.37098e-05	-1.63469	8.59483	7.87552	9.89913	8.50112	11.0316	7.60224	8.96231	7.25191	8.8589	3.00773	9.71612	9.87741	8.6094	8.6094	8.6094	7.15999	2.01384	7.2154	8.12056	9.87382	7.95635	4.785	9.87975	9.71709	5.65463	4.0006	7.69942	10.656	7.52137	6.20846	8.32298	2.96281	9.1949	8.71012	7.88004	8.88324	8.98414	8.29587	2.53852	8.41873	5.53078	9.50982	7.42744	9.67579	7.14381
NSFL1C	3.33356e-07	-6.47709	1.37506e-05	0.410072	6.94956	7.67067	6.22338	6.70233	6.84529	6.44188	6.25907	5.46517	7.1965	6.58917	6.29902	7.13422	6.63309	6.63309	6.63309	6.76705	7.2194	6.13368	5.79145	6.82568	6.09336	7.4937	6.23266	5.81211	5.6092	7.40749	6.74126	7.0253	6.30783	7.745	6.33229	7.01961	7.76486	6.32777	6.2843	7.12693	7.04238	6.93484	6.71039	5.66318	5.85846	6.85328	7.07672	6.33883	6.66286
MACC1	3.36732e-07	-6.47272	1.3862e-05	-0.564707	1.21998	0.244456	1.5423	0.654842	2.28973	1.3978	1.79186	1.74172	1.62984	1.04944	1.99053	1.47332	1.23716	1.23716	1.23716	1.7143	-0.0288923	0.913388	1.90132	1.97509	2.38397	0.258256	1.99855	2.14341	1.30968	-0.169397	1.43691	1.80232	1.6401	0.655276	0.864639	0.400929	1.11262	0.82204	1.43021	1.45313	1.11497	0.34414	0.0986003	1.43141	0.361047	0.981821	0.812462	1.32232	0.256774
AC130456.3	3.37595e-07	-6.4716	1.38698e-05	0.86783	3.80317	1.67125	3.37566	3.71586	1.6661	3.66503	2.42193	4.03872	1.671	4.76514	2.77435	3.86889	2.94175	2.94175	2.94175	5.16257	1.55112	3.41464	3.02217	3.80131	2.88638	3.62726	3.16913	2.94565	3.66875	1.83248	2.82157	2.99964	4.64065	3.25726	3.49265	2.94023	3.47595	2.54004	1.86381	3.93544	2.53943	2.7434	1.49953	1.06829	2.95582	2.35298	3.49754	3.04415	4.11491
LINC02471	3.46943e-07	-6.45974	1.42187e-05	0.899612	1.44828	2.0559	0.229211	3.21154	0.668531	0.772361	-0.0804398	1.21427	-0.0815063	0.142039	-0.0664212	-0.259848	0.589915	0.589915	0.589915	-0.134116	0.934317	1.53509	-1.17037	0.878299	1.08893	1.73833	0.516699	-0.0332443	0.788166	0.0592382	1.11247	0.876229	0.22011	0.433569	0.0174153	1.83177	2.55487	-0.108229	-0.246384	0.257426	1.20227	0.193057	-0.0767838	0.43891	1.41633	-0.613812	0.383379	1.39367	-0.385974
RPL12P27	3.47472e-07	-6.45908	1.42187e-05	0.671392	1.24839	2.01788	0.884321	0.766836	0.924079	1.42426	-0.654097	-0.233036	0.478119	1.37672	0.386479	0.959447	-0.149546	-0.149546	-0.149546	0.101419	1.84612	-0.949977	-0.179288	0.341756	0.583988	1.44622	1.34987	-0.759719	1.05238	0.43009	1.43691	1.04184	-0.216577	2.95734	-0.506244	1.03326	2.52309	0.470933	0.331966	1.58615	1.69898	0.605793	1.17347	0.400841	0.0838085	0.89661	0.00458762	0.932802	0.136651
ISG15	3.4894e-07	-6.45725	1.42503e-05	1.19836	8.34923	8.26061	8.49938	5.69596	5.44665	9.28442	6.51652	5.84856	7.54123	9.03531	6.94329	5.49268	7.55805	7.55805	7.55805	3.12465	8.22879	7.82463	7.67069	4.8164	8.13882	8.31073	7.15671	5.52531	8.88462	5.38851	7.23657	7.35894	7.38973	4.62805	2.77944	9.60479	8.29311	8.02538	6.7901	7.34208	8.81269	2.97717	7.48804	7.87669	9.09728	6.94633	3.17559	6.78108	8.17772
AC091057.1	3.52439e-07	-6.45292	1.43647e-05	-0.370684	1.92916	0.10638	2.05231	1.44268	2.16788	2.06906	2.23383	2.25375	2.59708	1.85078	1.68667	1.39941	1.98374	1.98374	1.98374	1.93359	2.06058	3.1231	1.74011	2.02991	2.30152	0.726571	1.80845	2.56701	2.53009	1.44447	1.73153	2.45873	2.18964	1.88119	1.96366	1.53305	2.20024	2.25849	1.92252	1.80212	1.3875	1.93948	1.63853	1.70574	1.87951	1.97758	1.79204	2.00798	2.26965
KPNA2	3.56909e-07	-6.44744	1.44708e-05	-0.451413	3.58676	3.39001	4.41081	3.15091	4.59734	3.21254	4.10594	3.91216	2.7001	3.61582	3.58785	3.93579	4.14249	4.14249	4.14249	3.60519	2.68529	5.42936	3.54577	3.93656	3.62891	2.82422	3.77936	3.88171	3.37903	2.88343	3.4534	4.0738	4.17384	2.42997	3.4062	3.00693	3.25186	3.59445	3.51412	3.38562	3.44059	3.52261	3.87131	3.41147	4.1559	3.45928	3.50394	3.32534	3.65005
DISC1-IT1	3.5698e-07	-6.44736	1.44708e-05	0.642437	2.86559	3.47663	2.48733	4.08881	2.39003	2.76166	0.288758	1.1578	2.7001	2.22066	1.95352	1.9922	1.81929	1.81929	1.81929	2.65487	3.27978	2.15672	1.77752	2.00276	2.05542	3.65378	2.06809	0.406176	1.43843	2.6401	2.62838	2.86464	2.12403	3.08488	0.92441	3.36147	3.80158	1.42463	1.58361	3.0895	3.04358	1.33999	2.22218	1.35383	2.45309	2.88248	1.77098	2.85485	3.01212
RNU6-761P	3.57382e-07	-6.44687	1.44708e-05	0.723862	0.618315	1.37309	-0.467813	0.920042	-0.587713	1.57361	-0.189656	-0.0226496	0.808353	0.451003	-0.507509	0.612158	-0.0401579	-0.0401579	-0.0401579	-0.904656	0.967398	0.286956	-1.3204	-0.780396	-1.19784	-1.49355	-1.83867	-1.33167	-0.671591	0.161263	-0.0963874	-0.666856	0.763159	2.03125	-0.220784	0.751464	1.5194	0.0597652	0.533754	-0.173303	0.438631	-1.37363	-0.426831	-0.338747	-0.467944	0.494266	-0.733186	-0.230436	-0.0646613
HEPACAM2	3.5786e-07	-6.44629	1.44708e-05	1.00892	1.65072	-0.761282	-0.584418	-0.546222	-1.03096	0.398109	-0.370746	0.836657	-0.384719	2.70172	-0.407843	1.95828	0.520189	0.520189	0.520189	2.65487	0.210975	0.615653	2.20577	1.12483	2.08858	0.791728	0.377539	1.12148	1.69192	-0.0505548	0.918036	-0.306682	2.16538	1.22509	1.81368	2.17891	0.411399	-0.367794	0.331966	-0.585479	0.485788	0.523738	0.751515	-0.546208	1.12601	-0.456046	1.63768	-0.549365	1.36675
PDLIM1P4	3.64956e-07	-6.43776	1.47287e-05	0.483881	1.50654	2.0559	1.51422	1.33778	0.989486	1.31535	0.514452	-0.159445	-0.0815063	1.24925	0.209464	0.737443	1.69823	1.69823	1.69823	0.869448	2.37601	-0.0787175	0.251351	1.07357	1.38425	1.36291	0.413608	0.447663	0.835701	1.73657	1.36238	1.60467	0.674277	1.82748	1.26217	1.97191	1.70084	0.97001	0.570933	1.30659	1.33696	1.49876	1.06496	0.54744	1.24468	0.373324	1.81281	1.37028	0.969701
IGKV1-17	3.73114e-07	-6.42816	1.50284e-05	-1.3171	2.75345	1.10953	2.26945	1.63205	3.2561	2.30097	2.72248	3.25974	5.92549	-0.79483	3.01784	4.16868	2.71868	2.71868	2.71868	1.10445	-1.66518	1.30382	3.62488	4.07005	1.69534	2.47337	4.2043	6.37127	0.881719	-1.49508	1.67106	3.18106	3.0199	0.810973	-0.76484	-1.77866	1.31181	1.84841	2.14839	3.6053	2.33572	1.82423	0.254956	3.74351	0.361047	2.04513	2.04113	1.39367	2.35287
BAMBI	3.77597e-07	-6.42297	1.51793e-05	-0.770626	0.439084	0.308835	1.26742	0.00365547	1.40355	1.19754	0.479204	1.92205	1.40432	-1.48679	0.640406	1.49714	-1.30603	-1.30603	-1.30603	0.91137	0.934317	-0.269115	1.01728	1.59363	-1.19784	-0.29724	2.2184	1.06928	-0.811046	-1.49508	1.70161	0.0451293	1.12359	0.526378	-1.48419	-0.611322	1.06925	-1.34715	1.16436	0.99184	1.67883	-1.37363	-0.0767838	0.581875	0.361047	-0.613812	0.142201	1.81353	-0.216391
CASP5	3.86418e-07	-6.41294	1.54823e-05	0.954159	5.78254	6.96249	5.21128	7.96416	4.62333	4.86421	3.33867	3.66619	4.25762	5.75916	4.86447	4.76464	3.94378	3.94378	3.94378	5.83935	6.52531	3.97964	4.83882	3.34133	4.65122	6.28442	4.82444	2.28746	5.29105	5.41199	5.37461	5.5361	2.94589	4.69205	2.67892	6.13705	7.28803	3.88661	3.71432	5.57979	6.13824	3.21144	5.16672	3.27081	4.31355	4.76134	2.04113	6.44482	3.73006
GINS2	3.86643e-07	-6.41269	1.54823e-05	-0.657343	0.514325	-0.761282	-0.711284	-0.842386	1.78139	-0.356347	1.41664	1.87028	0.56803	-1.89452	1.30124	1.23914	0.867678	0.867678	0.867678	1.06784	0.317442	2.32347	1.10819	1.57532	0.536715	-0.597457	0.868166	1.01512	-0.124941	-0.298914	1.20067	1.2991	0.763159	0.384825	-0.587399	0.46559	0.978403	0.30246	0.495591	0.785978	0.485788	0.0242815	1.14709	0.742705	0.229077	0.0959823	-0.858901	0.145302	-0.138532
GLUL	3.87786e-07	-6.41141	1.54979e-05	0.501407	9.52572	10.1442	9.19172	9.48921	8.85542	9.29533	7.86384	8.44342	9.67393	9.51248	9.12835	9.54655	8.66623	8.66623	8.66623	10.2926	10.1683	8.55085	8.6204	9.89704	8.65722	9.66556	8.843	8.10169	9.08385	9.69773	9.21105	9.64129	8.66137	9.79152	9.55906	9.36208	9.83629	8.67887	8.6907	9.21116	9.51547	9.90684	8.66397	8.06419	9.4702	8.78232	9.58747	9.21859	8.81216
ARL4A	3.89548e-07	-6.40944	1.5538e-05	0.768761	3.62498	4.18268	1.26742	2.39508	1.78139	2.78227	2.61291	3.48299	2.09058	4.16038	1.38701	3.66845	2.68721	2.68721	2.68721	3.5859	3.68969	2.18176	3.20491	3.13179	3.30137	4.01607	1.90029	2.74395	3.62883	3.17931	2.45989	1.97613	3.64057	3.15196	3.54594	3.30957	2.52309	2.03474	1.72226	1.90757	2.25636	3.26924	2.14432	1.75184	4.12838	2.39501	3.71168	1.83078	3.24782
GPR34	4.00945e-07	-6.39691	1.59617e-05	0.936789	1.71447	2.09293	-1.59917	-0.842386	0.586355	-1.76962	-0.436539	-0.0894267	0.168915	2.6722	-1.14603	-0.18213	1.43957	1.43957	1.43957	2.5658	2.52787	0.883182	-1.48786	0.720632	0.839083	-0.597457	-0.499953	0.487991	0.464465	0.161263	0.099877	-1.87496	0.603827	0.847407	2.17526	-0.157316	1.81025	0.758324	1.23555	-0.103323	0.660365	1.98619	1.06496	-1.93689	2.3615	-0.247676	3.70615	1.02558	0.699859
GPX3	4.06015e-07	-6.39146	1.61322e-05	0.824414	0.99954	1.24732	-0.359931	0.654842	-0.326616	0.166893	-0.0804398	1.1578	1.30321	0.142039	0.270914	1.3215	1.00163	1.00163	1.00163	0.781763	1.75433	0.286956	0.742468	0.617037	0.583988	0.971208	-0.0435887	-0.0332443	0.125093	0.0592382	1.28379	0.327747	-0.174693	1.71368	0.953391	-0.483742	-0.536029	-0.108229	-0.531498	0.257426	0.176517	1.85811	-0.140326	-0.275732	-0.802644	-0.247676	1.41133	0.689864	0.612487
ARPIN	4.24853e-07	-6.37176	1.68481e-05	0.801453	3.27128	2.84508	-1.86814	1.66133	2.35323	2.91883	2.81019	2.92113	2.73933	2.90995	2.33068	0.924739	2.96161	2.96161	2.96161	2.87212	3.36293	2.47292	2.79473	2.77867	1.71671	1.52498	0.760252	0.987251	3.0668	3.14236	2.47765	1.97613	2.70354	3.48246	1.21508	1.30469	-0.832372	2.52096	2.00633	1.35711	1.43633	5.06588	1.49953	2.51934	4.86062	2.15928	4.59671	3.37908	3.96865
CDCA5	4.2569e-07	-6.37091	1.68488e-05	-0.728637	1.17356	0.177069	1.48558	1.60216	2.71408	0.228262	2.17996	2.39479	1.71102	-1.16926	1.38701	1.56633	1.23716	1.23716	1.23716	1.42698	-0.485548	3.28202	0.742468	2.35372	1.32983	-0.774792	1.57359	1.95486	0.125093	-0.599106	1.57532	1.92615	1.62832	0.810973	0.400796	0.851638	0.978403	1.20324	1.40983	1.54316	1.0537	0.757105	1.78254	0.680507	-0.325824	0.569606	-0.14755	0.932802	0.821732
LINC02773	4.26964e-07	-6.36961	1.68667e-05	1.04984	-0.0414411	0.308835	-1.86814	1.30105	-2.46302	-1.1856	-1.22226	0.644569	-1.29462	-0.178113	-3.32666	-2.09384	-0.0401579	-0.0401579	-0.0401579	-1.91688	-0.485548	0.460646	-0.690032	-0.877933	-1.78109	-0.29724	-2.75609	-0.857389	0.523713	-1.84472	-0.0963874	-1.87496	-0.98369	-0.766624	-0.429412	1.75624	0.83041	-1.49461	-1.22672	-2.46126	-1.28763	-1.72843	0.0986003	-2.1464	0.82446	-3.52093	-1.1489	-1.53446	-0.799986
SQLE	4.31364e-07	-6.36516	1.70078e-05	-0.457735	2.91273	2.88786	3.35997	3.19161	2.75227	3.03501	3.10429	3.55033	3.46814	2.66222	3.33801	2.76514	3.43404	3.43404	3.43404	2.49864	2.7721	2.92978	3.12008	3.00073	3.251	2.98608	2.88431	3.53717	3.18162	2.00705	3.06424	3.00767	3.5404	1.88119	2.13788	2.01576	2.23989	3.15533	2.53452	2.67725	2.42311	3.11666	2.17074	3.06711	3.50004	3.0431	2.62619	2.88817	3.33228
LLCFC1	4.34965e-07	-6.36155	1.7117e-05	0.737972	0.667103	1.59585	-1.37255	-1.21548	-0.326616	0.964945	-0.307823	-1.46974	0.279512	0.88762	0.209464	0.815302	0.589915	0.589915	0.589915	-0.766046	0.999737	-1.18576	-0.0425976	0.617037	0.153701	0.34764	0.139853	-0.668244	-1.13835	0.256548	0.00507972	0.840698	-0.660995	2.16717	-0.673393	0.586817	-0.0804082	0.585515	0.242623	0.892578	0.38988	0.138963	-0.0767838	-1.192	-0.325824	0.0440947	0.968652	-0.303805	0.00561075
CMTM7	4.36119e-07	-6.36039	1.71296e-05	0.258872	5.87381	6.32398	5.25435	5.72051	5.7215	5.56445	5.36993	5.19401	5.8647	5.98303	5.34706	5.87436	5.98951	5.98951	5.98951	5.85421	6.10054	5.63594	5.64479	5.69838	5.34307	5.72237	5.38264	5.72516	5.45793	5.97116	4.99448	5.74031	5.50874	6.03471	5.76013	5.60616	5.64736	5.32865	5.26479	5.78285	5.59335	5.95952	5.52391	5.2745	6.14529	5.50687	5.95415	5.59692	5.77715
IGKV1-12	4.38364e-07	-6.35817	1.71849e-05	-1.16698	1.84583	1.03536	2.12838	0.711926	2.12487	1.68724	2.44037	-0.776747	2.28871	-2.46497	2.79542	1.18151	0.780899	0.780899	0.780899	1.64144	-1.47541	0.332378	2.58916	3.63448	1.77898	1.2745	4.60609	1.73792	1.16831	2.06084	-0.205534	2.37427	0.945132	2.23749	0.802286	-1.77866	1.06925	0.997866	1.50895	1.74635	1.65839	2.80549	1.03651	2.44646	0.557266	2.87508	1.04083	2.17931	1.22666
GPER1	4.49146e-07	-6.34761	1.7574e-05	0.907091	2.16369	4.21664	-1.59917	1.14398	0.307349	-0.108587	1.64055	3.96248	3.19938	0.625433	0.593071	0.612158	2.36804	2.36804	2.36804	1.66614	3.35671	-0.411615	0.664728	2.06969	1.4367	2.1397	0.340546	0.0227316	-1.13835	1.27275	2.30932	1.60467	0.5042	3.15922	0.597215	1.67654	0.83041	0.510147	0.287986	1.25424	0.38988	1.21484	-0.206797	0.148553	0.318384	0.86705	0.812462	0.301885	0.36766
MYO18A	4.52901e-07	-6.344	1.76872e-05	0.256701	6.4046	6.43091	6.41496	6.26326	6.40522	6.68083	5.93086	5.95802	6.60073	6.40852	6.01013	6.56344	6.16896	6.16896	6.16896	5.89265	6.55757	6.36164	5.91516	5.65327	5.87675	5.72445	5.84398	5.98322	6.33425	6.64594	6.34016	6.4038	6.6374	6.29345	6.06155	6.36496	6.72733	6.42651	6.39987	6.48563	6.33295	5.75444	6.21971	5.9025	6.36427	6.15576	5.74859	6.60059	6.3001
IGHV1-3	4.59596e-07	-6.33762	1.79091e-05	-1.35156	1.20519	2.01788	-4.34055	-0.0908156	2.6946	1.81275	2.20175	1.32097	2.17885	-3.42229	2.04431	-2.09384	0.810409	0.810409	0.810409	0.781763	-4.34055	0.820806	0.353986	2.51611	1.05578	0.511333	1.50837	1.54115	0.926314	-2.30715	0.188828	4.04286	1.80618	0.526378	1.39486	-1.08001	1.78366	2.15095	0.807382	0.36008	2.08319	-1.94503	-0.889987	-3.05931	-0.196457	2.79885	0.326758	0.530146	1.58901
UBA7	4.60342e-07	-6.33692	1.79091e-05	0.429268	7.09303	7.55142	7.21747	7.28941	6.51827	7.84717	6.75394	6.62463	6.9904	7.10306	6.66078	6.60102	6.84844	6.84844	6.84844	5.82709	6.85856	7.13477	6.7271	6.06932	6.51983	6.36289	6.1865	6.50195	7.2779	6.01269	6.50296	6.81882	7.40707	6.50921	6.56838	7.88136	7.30857	6.99984	6.85371	6.79943	7.15105	6.11384	7.012	6.70947	7.34768	6.73911	6.10276	7.18635	7.16411
AMBRA1	4.6216e-07	-6.33521	1.79091e-05	0.385596	5.95516	6.09442	6.1142	5.90623	5.6525	6.46039	5.32224	5.39973	5.65502	6.22925	5.59846	5.7621	5.63071	5.63071	5.63071	5.36847	5.76648	5.96998	5.5708	5.28486	5.61182	5.30917	5.45473	5.42762	6.26648	5.37531	5.60014	5.50239	5.99165	5.22941	5.61009	6.31099	6.19575	5.9235	5.67972	5.69597	5.79168	5.34059	5.7043	5.81112	6.15366	5.58384	5.44373	5.85255	6.01079
PIM2	4.62534e-07	-6.33486	1.79091e-05	-0.43279	7.34339	7.62676	8.25378	8.32993	8.40046	7.32032	7.3842	6.43868	7.31079	6.92731	7.93145	7.61331	7.15989	7.15989	7.15989	7.43116	6.25672	7.41795	7.58195	8.27602	7.49878	7.58957	7.84512	7.41204	7.28327	6.83147	7.0005	7.98235	7.25686	7.05963	6.80241	7.88837	7.55591	7.74139	7.1936	7.52513	7.14188	7.4961	7.45282	7.53196	7.23536	7.53418	6.56803	7.73082	7.42754
ZNF367	4.6294e-07	-6.33448	1.79091e-05	-0.472636	1.8811	1.10953	1.97201	1.18488	2.22331	1.42426	1.73323	2.65148	0.652664	1.19493	2.07908	2.10501	2.07166	2.07166	2.07166	2.45678	1.36505	2.96625	1.83188	2.87163	1.79915	1.22818	1.95026	1.89613	1.30968	0.912091	2.40525	1.82068	2.5744	1.38234	2.01954	1.59217	1.98376	1.87869	1.86381	2.2257	2.00442	1.68015	2.03351	1.62548	2.05867	1.72091	1.66077	2.69455	2.41874
SP110	4.68312e-07	-6.32946	1.80828e-05	0.501329	9.19498	10.0577	9.08047	9.52946	8.46925	9.524	8.15205	7.4034	8.88374	9.25698	8.6848	8.66318	8.85584	8.85584	8.85584	8.41715	9.64979	8.88978	8.65646	8.16255	8.5623	9.78974	8.77671	7.54162	9.12	8.73345	8.79001	8.96749	8.23664	8.7208	7.6629	9.91779	9.71007	8.75443	8.48025	9.24948	9.61609	7.9986	9.09792	8.53753	9.13618	9.0128	7.82629	8.88539	9.04844
GPRC5D	4.7098e-07	-6.327	1.81517e-05	-1.23101	0.126396	-1.05335	0.969512	-0.546222	2.51745	-0.108587	0.328911	-0.159445	1.671	-2.46497	1.56927	0.269	0.329533	0.329533	0.329533	-0.0512577	-1.30774	-0.139434	-0.795968	1.39916	0.215045	-1.21229	1.87464	1.88107	-3.22157	-2.30715	-0.0963874	1.04184	0.369136	-0.382196	0.173356	-4.34055	0.0140993	-0.367794	-1.22672	-0.246852	-1.28763	-0.166887	-2.23257	-1.08009	-1.68349	0.146068	-1.1489	-0.303805	-0.684824
WDR76	4.75768e-07	-6.3226	1.83019e-05	-0.468915	3.00393	1.76603	3.69621	2.5122	3.80717	2.84238	3.43839	3.61468	2.95466	2.49245	3.34517	2.73541	3.40532	3.40532	3.40532	2.64248	1.57278	4.81087	3.29797	3.21693	3.22886	1.44622	3.28075	3.16672	3.28798	2.65766	2.87616	3.24361	3.74792	2.01533	2.67021	2.7842	2.42329	3.51475	3.28719	2.81012	3.13517	3.21798	3.77126	3.45392	2.91345	2.92614	2.35606	2.57685	3.31854
DOCK4	4.78094e-07	-6.32049	1.8357e-05	0.717772	7.03185	7.70845	6.06303	8.04309	6.97761	6.58805	5.38667	4.36291	6.28827	6.75205	6.54039	6.7184	6.08089	6.08089	6.08089	6.71177	7.1723	6.33818	6.03779	6.7904	6.01144	6.05816	5.45365	5.65384	6.54375	7.2044	6.94332	6.86708	5.08725	6.67928	5.48913	7.63304	7.75762	6.06683	5.78235	7.12465	6.8609	6.32237	6.53017	5.64599	6.85552	7.02623	4.04135	6.6675	6.29046
AC138150.2	4.79831e-07	-6.31891	1.83893e-05	-0.637857	1.10306	2.46193	1.30068	-1.44581	1.37935	1.68724	1.52431	1.00615	2.61829	-0.909173	0.49347	2.22398	0.484021	0.484021	0.484021	-0.222025	1.52913	0.820806	1.64209	1.59363	1.27327	1.02639	1.52495	0.128561	0.835701	1.63384	2.24855	1.2991	0.47818	2.65219	0.633482	1.2689	0.411399	0.790534	1.52798	1.47617	2.2833	0.565349	1.22481	0.993522	-1.37267	1.73734	0.00458762	0.530146	1.31233
EZH2	4.81776e-07	-6.31715	1.84295e-05	-0.356857	3.52313	3.19939	3.52385	3.89907	3.94545	3.79747	3.74702	4.00711	3.18524	3.12131	3.35229	3.15027	3.87911	3.87911	3.87911	3.31627	2.93982	5.20353	3.41536	3.74509	3.58311	2.5507	3.42467	3.41699	3.60844	2.58609	3.1331	3.71025	4.36345	2.85369	3.69924	3.65973	3.38161	3.42526	3.46559	3.39169	3.6151	3.47973	4.03846	3.31242	3.31713	3.55508	3.34196	3.17142	4.01623
CMTM5	4.87019e-07	-6.31245	1.85954e-05	-0.776969	3.49536	2.0559	4.12543	5.07589	3.46022	4.09797	2.90621	3.54484	3.21338	2.49245	4.33448	4.50458	2.74948	2.74948	2.74948	4.39626	2.8272	1.90942	4.80298	4.95031	3.74784	2.5507	3.527	4.83112	2.45597	2.03419	3.2306	4.39488	3.9341	3.04622	1.94934	2.79682	4.77223	2.53053	3.79509	4.07403	3.45251	2.80549	1.45722	3.13825	0.442764	2.82983	2.9875	4.15383	3.66098
CEACAM4	4.96739e-07	-6.30387	1.89314e-05	0.631376	6.63361	7.64908	5.66361	6.51956	6.29069	6.20294	5.79054	3.99104	7.06853	5.65737	5.8099	6.78159	6.0441	6.0441	6.0441	6.12974	6.96117	4.96662	5.69942	6.38792	5.63023	7.32718	5.97346	4.86214	4.59174	6.63601	6.45108	6.57372	4.98702	7.66401	6.11142	6.56542	7.33513	5.31488	5.58635	6.44533	6.21371	6.47072	5.9988	5.12781	4.88458	6.19346	6.48879	6.20555	5.74156
PIF1	5.00756e-07	-6.30037	1.90491e-05	-0.532596	0.639703	-1.05335	0.746287	-0.418203	1.68596	0.550049	0.769154	2.17058	1.19449	-0.688887	1.2411	0.426153	0.688565	0.688565	0.688565	0.869448	0.718122	1.45522	1.07852	1.49967	1.60656	-1.21229	1.01626	1.40034	0.464465	0.656605	2.22771	0.164897	0.867074	0.655276	0.358086	0.989952	0.479236	0.470933	1.11487	0.0882981	0.575715	-0.166887	0.885168	0.400841	-0.259691	0.330647	0.683114	0.83365	-0.216391
RSPH9	5.02775e-07	-6.29863	1.90906e-05	0.748529	2.01219	1.64656	1.59687	1.40856	1.05206	1.37083	1.12892	1.29502	3.00382	2.52584	1.83645	1.73609	1.1475	1.1475	1.1475	0.588577	2.72451	1.0556	1.6821	1.48012	1.27327	2.90005	1.34987	0.36346	1.05238	1.40342	2.56332	2.00852	-0.13399	1.38234	-0.587399	2.98504	2.42329	1.38299	0.926914	2.05258	0.956612	-0.10031	0.977862	0.476002	2.00588	1.80125	-1.73521	1.81353	1.0715
CTSE	5.14268e-07	-6.28881	1.9491e-05	0.994629	1.46585	-1.64537	-4.34055	-0.842386	-0.105608	0.812989	0.161121	0.800231	-0.225162	1.96879	-0.407843	0.924739	0.369734	0.369734	0.369734	2.2271	1.31453	0.852331	0.0211789	2.25365	-0.12165	1.52498	0.139853	-0.0332443	1.34296	-0.441216	2.1851	1.0102	2.00151	1.82748	2.35976	0.851638	-0.407942	0.00591187	-0.00842391	-0.246852	0.339424	0.988839	0.564899	-0.622566	0.557266	-0.456046	2.42511	-0.959418	1.63407
OLR1	5.1691e-07	-6.28659	1.9555e-05	-1.14033	1.40919	-1.41995	-0.711284	-0.300624	0.924079	-0.18654	2.58831	0.762862	-2.12973	-0.909173	0.00765148	2.19515	0.949532	0.949532	0.949532	1.87123	-0.316753	2.93714	2.47991	1.49967	1.05578	-0.0488636	-0.311514	2.51917	0.270551	1.70314	1.40013	2.53851	1.12359	1.10984	2.73841	0.333234	0.606032	0.430623	1.21221	1.92442	-0.144031	1.84127	-0.276478	-0.703193	-0.077742	-0.123802	-1.73521	-0.381105	2.10335
BIRC5	5.19494e-07	-6.28442	1.96166e-05	-0.797337	1.19324	-1.05335	0.296705	0.819733	2.11024	-0.108587	2.13537	2.25375	0.652664	-2.15173	1.79522	2.23819	1.34191	1.34191	1.34191	1.03029	-0.316753	3.49174	1.49262	2.54463	1.2144	-0.97702	1.23362	2.02506	0.739012	-0.978629	2.02521	2.04019	1.60446	0.48072	0.442277	0.945305	0.606032	1.17911	0.607178	1.08471	0.816079	1.10626	2.14432	0.648373	-0.467944	1.00914	0.267824	0.932802	0.470627
H3C11	5.33909e-07	-6.27253	2.0124e-05	-0.571318	4.15014	3.45546	4.83072	3.84268	5.00968	4.10617	5.02509	3.92491	3.33361	3.71082	4.32365	4.85728	4.52052	4.52052	4.52052	4.41459	2.61396	6.00196	4.40008	5.22739	4.94399	2.90005	4.51356	5.31303	3.77009	3.22714	3.81652	4.6548	4.66103	2.8447	4.18799	3.84127	3.53293	4.33179	3.66788	3.80048	3.81297	4.28123	4.5621	3.90862	3.23349	3.7458	3.57859	3.67478	4.58546
CEP128	5.37078e-07	-6.26996	2.02063e-05	-0.458391	3.00484	1.62143	3.56549	2.26761	4.45987	2.59693	3.05726	3.22581	2.59708	2.56919	3.28686	2.97477	3.3104	3.3104	3.3104	3.10671	1.91556	3.76453	3.18417	3.12551	3.55966	2.28255	3.55553	3.19135	3.40289	2.65766	2.72077	3.75388	3.18985	2.44193	2.9401	2.03719	2.87752	3.5853	3.26468	2.697	2.80415	2.78802	3.12953	3.29695	2.81715	2.91895	3.02357	2.70394	2.89666
EVA1B	5.54736e-07	-6.25591	2.08325e-05	-0.453874	2.61484	2.60981	2.9314	3.33478	2.34075	2.90949	2.33588	3.0815	3.09738	2.49245	3.04448	3.63663	2.0838	2.0838	2.0838	3.16852	2.19234	1.37066	2.91712	2.60904	3.15252	2.2129	2.75673	3.70481	1.69192	1.5979	3.04053	2.82881	2.93636	2.3811	3.02445	2.29021	2.90245	2.74295	0.98316	2.85476	2.33572	3.10964	2.15759	2.57168	2.57589	2.33149	3.13494	3.50794	2.69877
TNFRSF13B	5.60145e-07	-6.2517	2.09973e-05	-0.786155	1.37528	0.486345	2.10974	0.766836	3.16702	1.45025	2.61291	1.60058	1.19449	0.304776	2.41476	1.86982	1.32156	1.32156	1.32156	0.952108	0.75648	0.419144	1.22112	2.39607	1.67366	0.34764	2.60901	2.5385	0.402678	-0.978629	1.36238	1.95966	1.42541	0.984583	1.66393	0.108709	0.83041	2.03474	0.71075	1.05441	2.00442	0.523738	-0.426831	1.35383	0.402484	1.18714	0.683114	1.56832	0.256774
CHAC2	5.67344e-07	-6.24615	2.12284e-05	-0.597537	0.11467	-1.22503	-0.259559	-0.842386	1.30422	-0.449386	0.247454	0.470058	0.56803	0.0223631	0.14528	0.269	0.656425	0.656425	0.656425	-0.639594	-0.57798	0.721873	0.303581	0.785781	0.674125	-0.29724	0.673666	1.04245	-0.671591	-1.49508	-0.750014	0.164897	0.188364	-0.561643	0.173356	-0.157316	-0.181543	0.430623	0.195787	-0.0365812	-0.464237	0.926339	0.716073	0.0535989	-0.395134	-0.00972878	0.490361	-0.549365	-0.57818
FKBP5	5.70666e-07	-6.24362	2.13139e-05	0.927798	9.63457	10.61	8.17414	9.41608	8.04211	8.55773	8.21968	8.45427	10.715	8.96782	8.02248	9.45507	8.58706	8.58706	8.58706	8.59951	10.5652	7.91534	7.55392	8.22003	7.00818	10.1498	8.40486	6.33512	6.83295	9.00188	8.67251	9.36615	7.23687	10.7753	7.06393	9.79706	11.3519	7.42418	7.65642	9.53439	9.32743	7.42442	8.28057	7.65001	7.39561	9.5347	8.20596	8.41914	7.41388
WFS1	5.77511e-07	-6.23844	2.14952e-05	-0.486554	1.77826	0.916433	2.42836	1.3736	3.51678	1.92821	2.46761	2.82469	2.41523	0.665934	2.53234	2.15078	2.00941	2.00941	2.00941	1.73779	1.23526	1.51554	1.91817	2.48702	2.21408	1.44622	2.4958	2.5385	0.788166	1.12907	2.79348	2.37427	2.04647	0.847407	1.55469	1.50256	1.27411	2.04812	2.13604	2.17027	1.73845	1.47712	1.6759	1.96252	1.22171	1.5076	1.54143	1.56832	1.58901
TSC22D3	5.77614e-07	-6.23836	2.14952e-05	0.814453	9.06286	10.1621	8.14239	8.43034	8.41001	8.82561	6.74886	7.19781	9.79145	8.27367	7.72943	8.7413	7.66616	7.66616	7.66616	9.04512	9.9279	6.7589	6.99767	8.73543	7.77664	9.45274	8.08871	7.27038	6.80934	7.8432	9.02332	8.89491	7.39321	10.3442	8.07236	9.83359	10.81	7.79992	7.08816	8.56478	9.4375	8.76589	8.65289	6.45521	8.09327	7.50119	8.55904	7.79921	7.46115
AZU1	5.85089e-07	-6.23278	2.1734e-05	-1.1026	2.37804	2.1111	-0.467813	0.533417	1.08235	1.25765	2.62102	1.49058	1.671	0.142039	0.49347	3.34661	1.4013	1.4013	1.4013	2.15912	0.934317	2.19411	3.14891	1.78105	1.75852	0.34764	0.581549	4.19356	-0.124941	0.789996	2.1851	2.68596	0.719402	3.75597	3.81824	2.69262	1.61297	1.2733	1.75494	2.30505	0.38988	2.22561	0.716073	-0.622566	0.793644	1.06228	0.637286	0.0305957	2.10335
MRVI1	5.88488e-07	-6.23026	2.18208e-05	0.672757	7.37418	7.69006	6.79496	7.45322	7.00604	6.8392	5.37233	3.86885	7.83747	6.90897	7.16939	7.4294	5.91081	5.91081	5.91081	7.64582	8.24511	4.8621	6.05884	6.66939	6.49609	9.15255	7.27171	5.17008	5.87824	7.0902	7.12053	7.57773	5.37852	7.68083	6.54239	6.70838	7.9733	6.54513	6.24386	7.8842	7.78778	7.44477	6.39873	5.19052	5.76723	7.06132	6.73098	7.13522	5.88827
LARP4B	6.16483e-07	-6.21008	2.28177e-05	0.271884	7.26849	7.53091	7.14092	7.8969	7.03392	7.26007	6.6685	6.67328	7.2009	7.10996	6.88184	6.90969	6.95012	6.95012	6.95012	7.30464	7.13729	7.37789	6.59384	6.70929	6.68477	7.28254	6.74593	6.60581	7.04434	7.23543	6.77577	7.25058	7.106	6.869	7.22077	7.02766	7.44524	6.945	6.86405	6.99556	6.82353	7.24239	6.84773	6.90659	7.34868	7.12006	6.99334	7.28388	6.93627
SH3PXD2B	6.2088e-07	-6.20699	2.29391e-05	1.01361	3.31221	5.64703	1.95121	1.18488	1.37935	1.42426	2.14665	3.23266	4.05485	2.49245	1.61738	2.80386	1.65007	1.65007	1.65007	2.36924	4.42047	1.13465	2.81286	1.49967	1.81904	3.70542	0.703109	1.35745	0.0464664	4.56326	2.16331	2.87345	1.22094	4.3987	1.21508	2.1595	1.86199	1.7205	1.06362	1.68834	1.63766	2.08963	1.32231	1.78177	1.96497	2.03187	1.91237	1.89776	0.197963
TLR8-AS1	6.36845e-07	-6.19597	2.34636e-05	0.80654	0.649436	0.644387	0.0839423	-0.842386	-0.68642	-0.18654	-0.577873	-0.670686	1.62984	0.781031	0.49347	-1.42302	0.109789	0.109789	0.109789	0.0270995	1.15138	-1.18576	-0.690032	-1.49882	0.153701	-0.167713	0.893929	-2.98073	-0.218941	-0.0505548	0.188828	-0.772943	-0.549737	-0.22262	-1.8343	0.400929	1.48681	-1.34715	0.607178	0.257426	0.232888	-2.9051	-0.594696	-0.546208	-2.32876	-0.383194	-0.510505	1.16806	-0.0646613
PPIB	6.37361e-07	-6.19561	2.34636e-05	-0.37173	5.43751	5.7035	6.18605	5.53524	6.62952	5.47866	5.74582	5.26422	5.87133	5.19171	5.84062	5.89803	5.65937	5.65937	5.65937	5.64184	4.73334	5.70556	5.3229	6.0644	5.34822	5.09678	5.79355	5.93754	5.13117	4.94215	4.74966	5.79122	5.59979	4.62542	5.10279	4.90147	5.31978	5.67443	5.06592	5.46499	5.14201	5.41787	4.77081	5.21815	5.42668	5.41538	5.33669	5.32305	5.10287
STARD10	6.42132e-07	-6.19238	2.35969e-05	-0.403824	3.23466	3.92472	3.98926	3.86172	3.15282	4.01333	3.04526	2.60999	4.18132	2.85846	3.69261	4.3431	3.08144	3.08144	3.08144	3.93994	3.37531	2.54222	3.29152	3.66077	2.55978	3.05405	3.85673	3.33645	2.78139	3.25048	3.41705	3.59235	2.73134	4.2603	3.26306	3.82287	3.45925	2.96383	3.03118	4.18307	4.33157	3.03014	3.39345	3.1555	2.34033	3.43933	3.28366	3.65556	3.61676
FGD4	6.55788e-07	-6.18324	2.40347e-05	0.589068	7.63506	7.7244	6.30862	7.23385	6.97408	6.91581	6.50726	6.21568	7.85655	7.32716	6.47987	7.39138	7.1107	7.1107	7.1107	7.08241	8.42388	6.73373	6.53292	6.8473	6.47665	9.12852	6.71556	5.20074	6.58953	7.82194	7.63311	7.57436	6.21585	7.55051	6.28605	7.64966	8.34943	6.44371	6.21112	7.69156	7.5162	6.81436	7.17138	6.16633	6.94938	7.5206	6.85629	6.78385	6.32264
SLA2	6.56386e-07	-6.18284	2.40347e-05	-0.45124	5.63661	4.67617	6.69531	6.40415	5.78964	5.63413	5.17443	5.4058	4.40519	5.28079	6.02023	6.39933	5.40873	5.40873	5.40873	6.16591	4.63896	5.80558	6.32359	6.33653	5.71893	4.91863	5.66759	6.71815	5.40966	4.86865	4.70512	5.97144	5.79093	5.38156	5.38927	5.09783	6.50126	5.43309	6.0344	5.83613	6.09042	5.2794	5.58167	5.59316	4.92068	5.52827	5.65969	6.21133	5.94414
MET	6.65808e-07	-6.17665	2.43363e-05	-0.81547	0.0100789	-1.91265	-1.17674	-0.686718	2.37787	-2.35317	1.32034	2.24022	0.808353	-2.15173	0.856257	0.47495	-0.614883	-0.614883	-0.614883	0.424559	0.509359	-0.202818	0.816233	1.41983	0.799578	-0.439553	0.703109	0.900274	-1.33486	-2.30715	1.60795	1.19038	-0.604294	0.112839	-0.673393	0.333234	-0.181543	-0.367794	-0.698412	0.309666	-0.295269	-0.387314	-1.57629	-0.404641	-0.802644	0.286668	-0.617553	0.0305957	-2.05729
PTP4A1	6.70223e-07	-6.17378	2.44542e-05	0.639079	0.207368	-0.31076	-2.19903	-2.50268	-0.587713	0.890967	0.328911	0.42292	1.0143	-0.411012	-0.407843	0.0926117	-0.695546	-0.695546	-0.695546	-0.766046	0.75648	-0.845121	0.353986	0.617037	-0.462253	0.34764	-0.311514	-0.424194	-0.124941	0.256548	1.15725	-0.666856	-0.845838	-0.382196	-1.64865	0.0253678	-0.536029	-0.775917	-0.122503	-0.173303	-0.876407	-1.54015	-0.0767838	0.237642	-0.077742	-0.456046	-1.73521	-0.959418	-0.57818
RINL	6.73906e-07	-6.1714	2.4545e-05	0.270091	4.78768	5.15468	4.57952	5.34986	4.40998	4.91642	4.46469	4.03481	4.98087	4.39832	4.63832	4.89138	4.50029	4.50029	4.50029	4.35887	4.89251	4.59723	4.3231	4.5889	4.50537	4.91863	4.53419	4.25911	4.42305	4.92412	4.89554	4.71491	4.56541	4.75334	4.48948	5.27064	5.36082	4.54033	4.59236	4.8671	4.68976	4.49819	4.66327	4.34687	4.07812	4.72678	4.11007	4.84532	4.48142
LHX4	6.79999e-07	-6.16749	2.47231e-05	1.33485	1.08652	1.89744	-1.86814	-0.546222	-1.16688	-2.7668	0.769154	2.11235	2.55373	-2.86564	0.14528	-0.429096	-0.968736	-0.968736	-0.968736	-0.31564	2.53892	-2.58702	0.449803	0.652402	-0.12165	-0.0488636	0.413608	0.0227316	-0.965438	-0.441216	1.76084	-0.887454	-1.98753	1.16861	-1.8343	0.400929	3.48423	-2.9915	-0.246384	-1.672	-0.144031	-2.19999	-0.784697	-0.546208	-0.802644	-0.992975	0.383379	-0.641476	-2.05729
RASGEF1A	6.93592e-07	-6.1589	2.51727e-05	0.626368	3.73523	4.1654	3.10147	3.28862	3.21567	3.30801	2.95834	3.62513	5.11369	2.9515	3.51352	3.76481	3.1349	3.1349	3.1349	2.62998	3.87107	2.8617	2.92548	3.66943	3.17585	3.16887	3.24616	2.77688	2.80546	3.98677	4.09492	3.5654	2.94589	4.56381	2.3046	3.99155	5.1297	2.89883	3.42047	3.65157	3.34152	2.4861	2.65539	2.63044	2.63792	3.26897	3.15134	2.57685	2.46935
H2BC12	6.95436e-07	-6.15774	2.51951e-05	-0.410175	6.61399	6.79068	7.2016	7.32644	7.37337	6.13546	6.74978	5.79866	6.80059	6.03033	7.03082	7.2631	6.34375	6.34375	6.34375	6.90183	6.42766	7.38902	7.10043	7.59798	6.71826	5.84255	7.26556	7.3779	6.16663	5.96764	6.44996	7.25015	6.35014	5.60016	6.19039	6.70504	7.53165	6.54513	6.47595	6.21564	6.60334	6.51718	6.28617	6.31383	5.59251	6.72064	6.29211	6.80254	6.43752
NAGK	6.97183e-07	-6.15665	2.5214e-05	0.4195	7.88415	8.54227	7.77443	7.16334	7.40667	8.40228	7.24194	6.69204	7.65203	8.28996	7.2772	7.44288	7.54959	7.54959	7.54959	6.96664	8.26478	7.67591	7.50457	7.64866	6.93771	8.08321	6.90246	7.03846	8.05979	7.76687	7.10633	7.36207	7.13751	7.635	7.51796	8.39239	7.20782	7.62397	7.33472	7.65259	8.09724	7.71815	7.72406	7.03486	8.13554	7.46619	7.49202	7.68563	8.17033
CCDC146	7.04654e-07	-6.15202	2.54394e-05	0.503984	3.6562	3.37505	3.54482	4.5348	3.72314	3.01774	3.4338	2.79723	2.83299	4.04612	3.09632	2.79427	3.08748	3.08748	3.08748	2.95463	2.43633	3.99385	3.07571	3.00757	3.40372	3.44686	3.00743	2.80907	4.01688	3.7535	3.40781	2.60356	2.82722	2.89778	3.45767	4.09736	3.78827	3.81012	3.52363	3.22489	2.73752	3.70587	4.05273	3.8743	3.53772	3.10138	3.60263	3.04415	2.35287
C4orf33	7.07821e-07	-6.15008	2.55089e-05	0.406753	4.45826	4.46286	3.92672	3.66617	3.81621	4.39083	3.51871	3.33806	3.91622	4.52482	3.21833	3.37902	4.71054	4.71054	4.71054	3.55317	4.91176	4.4785	4.32626	3.28611	4.1327	4.77295	3.9082	3.73863	4.70486	4.60006	4.29851	4.24325	3.90997	4.12216	3.62463	4.91601	4.4975	4.33179	3.73494	4.07025	3.91986	4.1977	4.51648	3.97166	4.96457	3.92144	3.56028	4.01364	4.30106
AC091059.2	7.11059e-07	-6.14809	2.55807e-05	0.322163	1.12615	1.14523	1.01029	0.711926	1.08235	0.687501	0.881414	0.323755	0.652664	1.22234	0.14528	0.522151	1.07641	1.07641	1.07641	0.91137	1.28858	0.942973	0.0211789	0.96524	0.674125	1.07955	0.139853	0.447663	0.788166	1.17857	1.01853	0.72853	1.18921	1.6938	1.21508	-0.0630846	1.06925	1.15457	1.11487	0.257426	0.778698	1.36377	1.39134	0.914664	1.35433	1.23421	1.38384	0.99531	0.897613
DDX60L	7.13214e-07	-6.14678	2.56009e-05	0.652615	10.3414	10.8598	10.1648	10.3801	9.20703	10.6801	8.76561	7.97028	9.86508	10.4265	9.48526	9.4371	9.56664	9.56664	9.56664	9.21232	11.0576	9.98334	9.67284	8.80902	9.55166	10.9094	9.7323	7.64472	10.2982	9.78759	10.1041	10.1362	9.07583	9.43683	7.98141	11.1229	10.9391	9.8211	9.48129	10.4302	10.6522	8.26443	10.2472	9.57017	10.1106	10.2515	7.8706	9.80669	10.1612
TK1	7.14112e-07	-6.14623	2.56009e-05	-0.732742	1.84638	0.308835	2.78631	1.60216	3.23602	0.852505	2.44037	2.25375	2.02859	-0.497823	2.31617	2.9577	1.8047	1.8047	1.8047	2.17642	0.0960209	4.08955	2.29877	2.90134	1.05578	0.431807	2.05673	2.88654	1.30968	0.0592382	2.14119	2.02444	1.91687	0.384825	1.51636	1.56291	1.61297	1.7698	1.70564	1.40592	1.59528	1.92357	2.55867	1.31341	0.729965	1.56396	0.770621	1.66762	1.74093
RNF213	7.16373e-07	-6.14486	2.56372e-05	0.635098	11.6256	12.5838	11.7836	12.143	10.7079	12.3083	10.3959	10.5051	11.288	11.6698	10.8106	10.8148	10.9802	10.9802	10.9802	10.16	12.0371	11.371	10.8976	10.183	10.6099	11.7069	10.6984	9.68479	11.4178	10.7109	11.2554	11.3551	11.3926	10.5861	10.0863	12.4487	12.4514	11.0002	10.8234	11.2548	12.1563	9.76462	11.5767	10.8216	11.7934	11.267	9.2868	11.5446	11.5738
KIFC1	7.19093e-07	-6.14321	2.56898e-05	-0.66434	1.68654	0.874507	2.71409	0.870759	3.24944	0.812989	2.0297	2.37015	1.40432	-0.108146	1.77415	1.97534	1.56606	1.56606	1.56606	1.78365	0.934317	4.00441	1.98366	2.50648	1.46223	0.258256	1.95026	1.99739	0.969573	0.345927	2.38657	2.50486	1.93611	1.40696	1.37357	1.2689	1.11262	1.9374	1.52798	1.25424	1.55163	1.45515	2.18378	1.25058	0.793644	1.21087	0.968652	1.5266	1.91535
MIR3125	7.20582e-07	-6.14232	2.56983e-05	0.874724	0.276811	-1.91265	0.697176	-0.686718	0.0859971	-0.108587	-1.34325	-0.479428	-4.34055	0.496627	-0.855967	-1.25444	-0.538492	-0.538492	-0.538492	-1.64976	-0.57798	-0.0204538	-0.179288	-0.445265	0.717166	-0.439553	-0.0933404	0.900274	1.61227	-0.441216	-2.4292	-0.887454	-0.0183489	-1.29225	-0.506244	-0.906307	-3.14064	-0.298395	0.0972919	-1.02879	-0.0739705	-1.22435	0.042475	-0.10169	1.12601	-0.888441	-1.99905	-1.36784	0.860171
STMN1	7.40944e-07	-6.13021	2.63786e-05	-0.613155	3.99202	2.76702	4.64896	3.52995	5.08268	3.45002	4.6062	4.37534	3.52538	3.53065	4.07503	4.4261	4.5966	4.5966	4.5966	3.72169	2.4125	6.4331	4.34195	4.77087	4.29775	2.43309	4.52803	5.19008	3.66875	3.23886	3.74499	4.62639	4.53891	2.85369	3.55543	3.55961	3.43383	4.27316	4.19105	3.85423	3.86741	3.80473	5.14523	3.94545	3.26191	3.7171	3.03245	3.66039	4.4471
PI3	7.63502e-07	-6.11719	2.71347e-05	-1.27817	4.6362	5.2335	3.61921	5.05949	6.55046	2.28662	0.367978	-0.776747	2.53155	1.68333	6.3137	5.69803	2.66315	2.66315	2.66315	5.1385	2.74374	3.53123	6.88327	6.81011	3.00402	1.52498	6.98043	4.96929	2.89793	7.29346	4.84512	6.84315	1.3268	5.71059	5.14265	1.0753	4.28649	2.39044	2.35434	3.77283	3.45251	6.04565	4.4826	3.05491	2.77833	5.08876	3.57251	7.09208	1.4447
SLC7A11	7.66501e-07	-6.11549	2.71878e-05	-0.638246	3.01218	3.43397	2.09085	1.74576	3.43696	2.68712	1.55849	1.8526	4.27106	3.21982	4.32365	4.02041	3.20324	3.20324	3.20324	3.42879	3.03651	1.96816	3.61974	3.25769	3.95981	3.18108	3.19527	2.65819	2.22558	3.53335	2.26909	3.84188	2.26766	3.41123	3.31423	3.62477	2.75971	2.89142	3.64627	3.87171	2.55056	2.46427	3.04635	2.20273	0.628845	4.88999	1.98734	3.41382	2.29793
TXNIP	7.67644e-07	-6.11484	2.71878e-05	0.588782	12.1753	13.3786	11.912	12.1856	11.7197	12.1772	10.583	10.7173	12.5261	12.0937	11.2988	11.6493	11.7628	11.7628	11.7628	11.8475	12.7128	11.0098	11.5912	11.3346	10.9509	12.3269	11.548	11.0446	11.2295	10.9969	12.1602	11.9669	11.1785	12.2838	11.2992	13.2959	13.2347	11.6002	11.3422	11.7058	12.7238	11.5104	11.8686	10.9794	12.2264	11.3996	11.5009	11.7504	11.4278
HAUS4	7.80634e-07	-6.10755	2.76003e-05	0.592039	5.20396	5.55215	3.61921	6.0066	5.01754	4.55552	4.17915	2.86933	5.44266	3.77703	4.67856	4.92909	4.40195	4.40195	4.40195	5.10728	5.35461	3.84116	4.55892	4.82418	4.39041	6.57787	4.72389	3.30294	4.28004	5.0624	5.40741	5.42802	3.32373	5.66793	3.69924	5.53638	6.02469	4.29858	4.29191	5.57312	5.19795	3.90538	4.63745	3.96515	3.92303	5.58043	4.12259	4.89944	4.33216
TMEM131	7.86865e-07	-6.1041	2.77728e-05	0.349257	7.43454	7.74854	7.31429	7.83882	6.91639	7.75667	6.61165	6.79049	7.34378	7.63575	6.642	7.0928	7.13423	7.13423	7.13423	7.03697	7.7355	7.55628	6.73127	6.61888	6.9303	7.75544	6.59066	6.29661	7.623	7.28005	6.98506	7.01687	7.25662	6.79048	7.07097	7.97456	7.26719	6.98599	6.90875	7.01535	7.02103	6.91184	7.07193	6.97943	7.55511	7.32861	6.89575	7.14947	7.23758
NAPA	7.93231e-07	-6.1006	2.79328e-05	0.54914	7.03192	7.98362	6.95823	7.23385	6.17596	7.45237	6.28545	5.78823	7.14721	7.23004	6.72119	6.56977	6.61909	6.61909	6.61909	6.113	7.07463	6.82643	6.59121	6.44576	6.21565	6.83035	6.33141	5.83281	6.86122	6.0161	6.68216	6.89333	6.52553	6.35958	5.90346	7.6527	7.63239	6.50808	6.1379	6.94588	7.1308	6.04105	6.6477	6.34361	7.17013	6.56825	6.12056	6.81234	7.02829
KIAA0825	7.94117e-07	-6.10012	2.79328e-05	0.606259	5.79982	5.77076	5.2025	5.61035	5.82926	4.71944	3.68262	2.75978	5.44859	4.91548	4.94679	5.30301	4.40679	4.40679	4.40679	6.44546	5.88375	4.30138	5.08623	5.18877	5.24538	6.82841	5.62111	4.44216	4.10681	6.18911	6.50512	5.86382	3.68105	6.48629	5.59752	5.33695	6.78039	4.56846	4.23514	6.05564	5.5893	5.84275	5.41761	4.32162	4.32706	5.38572	4.83865	5.74978	4.61947
AC092746.1	7.97125e-07	-6.09847	2.79907e-05	1.0913	4.96284	6.55554	2.05231	4.46179	4.21525	3.71412	3.998	1.60058	4.08562	3.6616	3.06197	4.2724	2.81646	2.81646	2.81646	3.56635	4.2461	2.15672	2.8832	5.16907	2.78888	5.60491	3.53521	1.95486	1.46889	3.27344	3.35112	3.75865	2.59876	6.84555	4.74081	4.5896	6.81033	3.46572	3.19494	3.64651	4.89366	4.92714	3.0676	3.41625	3.57897	4.41577	5.5832	1.99274	3.53001
H3C3	8.01697e-07	-6.09599	2.81032e-05	-0.855424	4.4758	3.57807	5.33482	4.04506	5.82479	3.82753	5.63708	3.75926	4.36812	2.27404	5.25121	5.27745	4.87319	4.87319	4.87319	4.72781	0.553598	6.54525	4.9779	5.82292	5.36692	2.08876	5.23801	5.79111	3.36289	2.49133	4.08336	5.47368	4.63624	3.09249	3.66022	3.93559	4.2236	4.59378	3.71016	3.95607	3.94539	4.34832	5.00359	3.7511	2.24104	3.93931	2.89316	4.11916	4.73516
TAF8	8.05934e-07	-6.0937	2.82036e-05	0.326878	6.19457	7.10527	5.87572	6.40739	5.7009	5.94182	5.82692	5.69831	6.12937	6.44243	5.4569	6.03146	6.00714	6.00714	6.00714	5.91986	6.40821	6.14725	5.52478	5.39466	5.34993	6.29569	5.69349	5.34769	5.80848	5.72476	5.64406	5.92236	5.89969	6.31149	5.83795	6.34791	6.81444	5.92169	5.5954	6.10081	6.18543	5.4993	6.21654	5.62757	6.07975	6.10047	5.75263	5.8345	5.76327
KIF11	8.11076e-07	-6.09094	2.83353e-05	-0.663442	2.66653	1.62143	2.7017	2.1486	4.11257	2.48823	3.14984	3.25302	2.46289	1.19493	2.9998	2.81337	3.04466	3.04466	3.04466	2.71529	0.900461	5.1202	2.42202	3.08079	2.64026	1.44622	2.62448	2.88654	1.86226	1.12907	2.38657	3.27723	3.42595	1.54646	2.55203	2.05831	2.70409	2.94963	2.60791	2.56353	2.69802	2.54968	3.13625	2.12312	1.41633	2.18346	2.26858	2.66601	2.61133
H1-2	8.14361e-07	-6.08918	2.84017e-05	-0.42828	6.33234	5.43624	7.21475	6.07211	6.96446	6.41492	6.77271	6.32549	6.7725	6.28638	6.70319	7.14179	6.49111	6.49111	6.49111	6.01065	5.19619	7.58295	6.57271	7.22853	6.70562	4.82835	6.75431	7.25476	6.52936	5.83885	5.50374	6.82508	6.79721	5.44238	6.19039	5.68974	6.33042	6.51953	6.33988	6.15803	6.14744	6.47209	6.4549	6.48962	5.52141	6.01123	6.27631	6.04121	6.26203
BLVRB	8.17414e-07	-6.08756	2.84235e-05	0.728252	5.6867	4.70636	4.61961	4.67776	3.58184	4.70602	4.23569	4.68602	4.15254	6.08269	4.45521	5.52055	4.73191	4.73191	4.73191	7.46498	4.90537	4.79067	5.82757	6.64435	5.64563	4.90765	3.97006	4.93688	5.47679	4.95641	4.11775	4.5237	5.92519	5.83714	6.63586	4.76041	3.93439	4.58692	3.56107	4.55717	4.28234	6.39413	4.45331	3.53525	6.24191	4.40038	6.65468	4.50481	5.45806
CLEC4A	8.19149e-07	-6.08664	2.84235e-05	0.451417	1.33844	0.540972	0.361182	1.47602	1.56244	1.00056	0.328911	-0.57189	0.279512	0.852958	0.329854	1.52058	0.810409	0.810409	0.810409	1.39778	1.26217	0.687328	0.851747	0.848114	1.05578	1.59966	0.992612	0.674275	0.688124	2.06084	1.67106	1.47162	-0.216577	0.433569	0.268676	1.75624	1.70084	1.31818	0.677046	1.14346	1.02206	0.957927	0.852897	0.43891	0.5935	1.42886	0.853123	0.900503	0.612487
LMO2	8.20415e-07	-6.08597	2.84235e-05	0.483654	6.02751	6.5355	5.77873	6.38563	5.11051	6.41739	5.56536	5.26422	5.8558	6.04192	5.27577	5.45213	5.8746	5.8746	5.8746	5.34189	6.02694	5.4514	5.70307	5.32788	5.36861	6.6825	4.92782	5.10675	6.00969	5.50467	5.53801	5.64825	5.39513	5.52342	4.89254	6.72416	6.15096	5.09555	4.62366	5.74303	5.91094	5.32099	5.37279	4.93483	6.59401	5.23333	5.38081	5.583	5.73252
STIM2	8.20522e-07	-6.08591	2.84235e-05	0.26016	5.80759	6.09898	5.75793	5.85646	5.7227	5.34825	5.4219	5.02673	5.44859	5.85423	5.47006	5.40411	5.70231	5.70231	5.70231	5.46663	5.86412	6.02807	5.50819	5.22299	5.99295	5.04761	5.42853	5.4418	5.72732	5.92295	5.20104	5.50806	5.68686	5.20153	5.63042	6.02083	6.07214	5.84995	5.78037	5.56777	5.49161	5.60907	6.12914	5.48474	5.90696	5.62526	5.52619	5.83557	5.82895
RAD54L	8.287e-07	-6.0816	2.86585e-05	-0.613731	1.24598	0.540972	1.59687	0.766836	2.64472	0.102796	1.88907	2.62048	0.948865	0.252544	1.35898	2.02535	1.21526	1.21526	1.21526	1.14014	0.0960209	3.13596	1.35089	1.97509	0.536715	-0.0488636	1.45745	1.59753	0.125093	-0.169397	1.67106	2.14587	1.77446	1.10984	0.314074	0.851638	0.978403	1.65202	1.32532	1.25424	1.41212	1.26621	1.69423	1.13938	-0.325824	0.86705	0.142201	0.900503	1.41918
H2AC13	8.44307e-07	-6.0735	2.91492e-05	-0.611288	2.87329	1.40289	3.28716	2.99865	3.8117	2.79246	4.0797	2.65148	3.14198	2.17929	3.56349	3.6789	2.6054	2.6054	2.6054	3.30845	2.52787	4.10271	3.07571	3.96497	3.30137	2.51255	3.25115	3.67891	1.74268	1.56105	2.44191	4.08902	2.85276	1.67365	1.73241	2.5207	3.69862	2.18769	2.17278	3.26513	2.24269	2.98486	2.88816	2.57168	1.22171	3.01642	1.77098	2.74089	2.13504
EMP1	8.75253e-07	-6.05787	3.01669e-05	-0.704133	2.15319	2.21554	2.16497	-0.191909	1.1411	3.00025	1.88907	2.66167	1.45233	1.53815	2.12972	1.88795	2.23291	2.23291	2.23291	1.06784	3.16327	2.59907	2.83077	1.53799	2.6514	3.39538	1.63598	2.69311	2.24332	1.17857	2.84912	2.24433	2.97409	2.10834	1.30777	2.56564	0.978403	2.1633	1.01048	1.56482	2.67785	2.15922	1.12023	1.64189	2.18278	1.99134	0.727531	1.62872	2.39275
H1-5	8.77438e-07	-6.05678	3.01915e-05	-0.896734	5.26329	3.61674	5.29618	4.41098	6.69777	4.08143	6.19193	4.56096	5.15054	3.15015	5.83427	5.85835	5.78174	5.78174	5.78174	5.44539	2.16408	7.36702	5.70913	6.80029	6.07899	3.5063	6.04994	6.46958	4.2584	4.02786	4.33794	6.4242	5.49583	4.1516	4.69864	4.27022	5.10038	5.36253	4.13319	4.95787	4.64632	5.4681	5.97463	4.01325	2.98339	4.85654	3.983	4.93376	5.34063
H2AC8	8.83566e-07	-6.05376	3.03515e-05	-0.589179	4.18148	3.65439	5.00731	3.9052	5.18395	3.90004	5.11108	3.70611	4.31717	3.2266	4.77716	4.93346	4.32481	4.32481	4.32481	4.23228	2.60347	5.79952	4.09019	5.33877	4.5507	2.60609	4.72209	5.08061	3.36289	3.53335	3.43534	4.87056	4.26797	3.01453	3.99938	3.53722	4.01088	4.13574	3.72673	4.0512	3.8037	4.39234	4.35592	3.56137	3.0501	3.82481	3.63797	3.73555	4.30803
MCUR1	8.96707e-07	-6.04735	3.07515e-05	-0.345487	3.90271	3.04731	4.36044	4.18771	4.5081	4.12242	3.69035	4.0111	2.73933	3.56318	3.55734	3.9005	3.76316	3.76316	3.76316	4.34746	3.48789	4.1447	4.66505	4.93603	4.2835	3.45693	3.86652	4.3246	3.70119	3.19142	3.54048	4.29011	4.29244	3.42335	4.03031	3.5221	5.2291	3.7622	3.99298	3.74938	4.10869	3.73807	3.3127	3.7624	3.9959	3.91062	3.90296	3.91604	4.46592
MAML3	9.04988e-07	-6.04336	3.09838e-05	0.554945	6.39058	6.7543	5.89762	7.18366	5.7885	6.12642	4.89907	5.33754	6.96786	5.66239	5.81764	6.38583	5.48162	5.48162	5.48162	6.95792	7.02737	5.04716	5.01166	6.36146	5.00605	6.60871	5.6601	5.20679	5.26524	6.12585	6.31073	6.80217	5.38991	6.77282	6.25292	5.74776	7.31265	5.07445	4.91324	5.83947	6.21808	6.2014	5.76084	4.67659	5.65385	5.54587	6.12783	6.66028	5.57966
TP73	9.07458e-07	-6.04217	3.10167e-05	-0.66281	1.37849	-1.05335	2.86624	-0.191909	2.77099	0.597337	2.41262	3.29943	2.71985	-1.48679	1.77415	2.48447	1.36198	1.36198	1.36198	1.03029	1.82822	0.913388	2.10636	2.10841	1.71671	0.162967	2.06809	2.32134	0.580624	0.256548	2.96699	1.37557	0.674277	0.917625	0.633482	0.698642	1.96022	1.73712	1.56531	1.47617	1.67883	0.792577	0.204697	1.06829	-0.077742	0.806048	0.490361	1.05522	0.136651
SUCNR1	9.11497e-07	-6.04024	3.11029e-05	-0.641642	2.79918	3.17369	1.99251	2.67895	3.35247	3.29373	2.60476	2.22656	0.38223	3.24677	2.48126	2.56557	3.06317	3.06317	3.06317	2.57887	2.68529	2.68037	2.83964	3.03463	3.12082	1.40517	3.11539	3.2744	2.85244	1.89305	2.62838	2.81056	4.09042	1.79053	2.40243	2.09964	3.28066	2.63179	3.12791	2.15607	4.07053	1.93948	1.94444	2.82985	2.07157	1.83218	2.91253	2.34448	3.19617
LINC02724	9.23444e-07	-6.03459	3.14583e-05	0.596719	1.09427	2.07453	0.538938	-0.546222	-0.175582	0.890967	0.881414	1.8526	1.24988	1.19493	0.329854	-0.18213	1.4013	1.4013	1.4013	0.101419	1.48413	1.13465	-0.252818	0.543596	0.0225843	0.791728	-0.144869	0.674275	0.788166	0.345927	1.01853	0.766896	0.982633	0.227856	0.737115	1.30469	0.544027	0.621773	-0.312556	0.146905	0.778698	1.31582	0.604204	0.361739	2.1096	-0.992975	1.07561	0.763547	1.49443
ATXN7L1	9.29813e-07	-6.0316	3.16229e-05	0.190992	5.83098	5.9593	5.88671	5.18827	5.48968	5.78599	5.43231	5.37672	5.69298	5.97701	5.4602	5.64438	5.92774	5.92774	5.92774	5.1905	5.7392	6.03582	5.69331	5.18726	5.65949	5.69069	5.69349	5.54814	6.02771	5.97991	5.83701	5.54303	6.00823	5.87182	5.56503	5.82834	5.63067	5.68304	5.83297	5.71909	5.66039	5.86895	5.85549	5.89995	6.06773	5.63954	5.72414	5.59692	5.88595
AL078599.3	9.55128e-07	-6.01994	3.24005e-05	0.647916	0.930757	-0.0463239	-1.00436	1.01383	-0.49533	0.772361	0.288758	0.102291	-1.65257	0.540853	0.14528	-0.620872	0.839328	0.839328	0.839328	-0.639594	1.38966	0.971965	-0.0425976	-0.445265	0.487841	1.48614	0.139853	0.406176	1.27562	1.17857	0.099877	0.378187	0.28158	0.48072	-0.0967741	1.0753	1.31181	0.548323	0.374645	-0.173303	0.339424	0.138963	0.885168	0.680507	1.58778	-0.18441	0.853123	0.199407	1.31233
SAT1	9.55833e-07	-6.01962	3.24005e-05	0.540208	8.75224	9.17699	8.41884	9.03494	7.80665	9.06427	7.71909	7.50203	8.25708	8.81371	8.28863	8.03827	8.44053	8.44053	8.44053	8.34107	8.91696	8.07439	8.19914	8.1237	8.0448	9.151	8.25729	7.15731	8.74611	8.20042	8.64747	8.69583	7.69185	7.90588	7.17652	9.57876	9.35737	8.14873	7.47953	8.86153	8.77744	7.65961	8.08736	8.01916	8.99348	8.45361	7.27819	8.39724	8.34714
AC011462.5	9.66038e-07	-6.01501	3.26925e-05	-0.329298	2.37806	2.53103	2.78631	3.15091	2.89565	2.90949	2.40324	2.00441	2.28871	2.00081	2.88658	2.8692	2.38776	2.38776	2.38776	2.36924	2.51674	2.43178	1.95129	2.18285	1.95111	2.99993	2.65494	1.85046	1.66585	2.28079	2.73561	2.50486	2.17352	2.047	1.06382	2.80933	2.93904	1.96589	2.50601	3.43349	2.77597	1.73588	2.33161	2.67896	1.64069	2.71837	1.49079	2.74089	2.50618
ISOC1	9.69858e-07	-6.01329	3.27678e-05	-0.384538	2.3039	2.21554	2.9314	1.85116	2.6946	2.82262	2.32599	3.30594	3.01984	2.31281	2.48126	2.62082	2.25454	2.25454	2.25454	1.42698	1.03137	3.00183	2.43379	2.51611	2.64026	1.86484	2.17703	2.63144	2.29525	1.40342	1.95085	2.41107	2.70354	1.65322	2.67892	2.55081	1.81025	2.86897	2.40669	2.38026	2.43517	2.50761	2.308	2.35981	2.51107	1.89211	2.28353	1.97734	2.11928
MIR5690	9.71746e-07	-6.01245	3.27777e-05	0.94773	1.03824	2.0559	-0.467813	1.40856	-0.0388721	-1.03378	-1.22226	-1.30196	1.62984	0.198349	-1.73251	1.18151	-0.0401579	-0.0401579	-0.0401579	0.688401	2.09092	-0.202818	-1.3204	-0.372374	-3.3558	0.658332	-2.22566	-2.98073	-0.671591	1.73657	-0.0963874	0.689116	-0.446448	1.75262	-1.08014	0.751464	2.66092	0.161792	-1.10445	0.588689	0.176517	-0.851519	-0.0767838	-1.93689	-1.00448	1.78554	-0.230091	-1.21848	-1.0622
NCOA2	9.74099e-07	-6.0114	3.28032e-05	0.41361	8.68268	9.10984	8.68715	8.73834	8.34434	8.96382	7.48732	7.01569	8.47648	8.79827	8.16307	8.73129	8.16839	8.16839	8.16839	8.53036	9.15251	8.13712	7.97089	8.09708	7.90899	9.02053	8.071	7.39855	8.29159	8.61005	8.40391	8.66172	8.06275	8.82181	8.33731	8.95097	9.31825	8.07811	8.09489	8.69783	8.72865	8.44142	8.22866	7.85199	8.78359	8.53031	8.23558	8.45172	8.31313
PLK1	9.81653e-07	-6.00804	3.30035e-05	-0.493107	2.82229	2.37439	3.30366	3.2506	3.90364	2.9281	3.30384	3.16265	2.93789	1.3016	3.24919	3.35966	2.85944	2.85944	2.85944	2.89319	1.73525	4.86016	2.74838	3.4101	2.49942	1.48614	3.01331	2.85605	2.40961	2.21113	3.06424	3.0932	3.24875	2.39347	2.57085	2.65152	2.98644	2.7347	3.01104	2.697	2.7179	2.65943	3.12953	2.44646	1.37529	2.91173	1.93148	2.9526	3.07066
TRIB2	9.90257e-07	-6.00425	3.32383e-05	0.706964	5.8712	4.8349	6.08587	4.89668	5.43055	5.96002	5.22318	5.04631	3.47977	6.44024	5.09006	5.1099	5.74592	5.74592	5.74592	4.45058	5.51563	6.31432	5.50261	4.97845	5.89209	4.54628	5.19462	5.61567	6.66631	4.53977	4.43659	4.52929	5.52472	4.24332	5.68975	5.68635	3.69148	5.90155	5.41036	4.5436	5.42512	5.36583	5.85039	5.86716	7.05222	5.16513	4.59371	4.77357	5.99469
CDT1	9.99251e-07	-6.00033	3.34855e-05	-0.64191	1.68788	1.14523	2.36688	1.63205	2.62427	0.643123	2.101	2.67179	1.40432	0.252544	1.79522	2.3206	1.81929	1.81929	1.81929	1.5647	0.596521	4.07292	2.1498	2.6446	1.58349	0.162967	1.88752	2.99546	0.402678	-0.298914	2.54659	2.27127	2.1324	0.384825	1.28515	1.7036	1.75658	1.65202	1.28114	1.49885	1.65839	1.64177	2.95049	1.46869	0.913144	1.08813	0.383379	1.32232	1.69913
CCND2	1.01846e-06	-5.99206	3.40735e-05	-0.41642	6.86677	6.14048	7.9386	6.60492	7.74939	7.01274	6.92865	6.92767	6.17659	7.0181	7.07779	7.27219	7.22263	7.22263	7.22263	6.31	5.87179	8.14848	7.32552	6.76387	6.87436	5.6735	7.10973	7.07035	6.85475	6.84399	6.40773	7.0381	7.67816	6.0258	6.96778	6.59824	6.61023	7.48295	7.45333	6.84605	6.9825	6.70691	7.40214	7.04415	7.11822	7.30882	6.42785	6.9484	6.89983
AP000646.1	1.03123e-06	-5.98664	3.44448e-05	0.816788	-0.43688	-2.24098	-2.19903	-1.21548	-1.03096	-1.35529	-1.6207	-0.57189	-2.84757	0.198349	-4.34055	-1.42302	-1.4386	-1.4386	-1.4386	-0.0512577	-2.85718	-0.845121	-0.498981	0.157115	-2.0431	-0.597457	-1.40261	-0.582224	-1.33486	-1.49508	-0.925651	-1.14798	-0.98369	-0.22262	0.314074	-0.751289	-3.14064	-1.21338	-2.06901	-1.672	-1.0009	-0.387314	-0.784697	-1.31333	-0.259691	-1.50876	0.267824	-2.90091	-0.57818
AC108718.1	1.04289e-06	-5.98176	3.47777e-05	0.806324	0.679122	0.957175	-1.59917	-0.842386	1.19755	1.03531	-0.734573	-0.670686	0.168915	0.625433	-3.32666	-0.429096	-1.18462	-1.18462	-1.18462	-1.22963	0.416589	0.75561	-0.795968	0.505424	-0.199563	-0.29724	-1.53384	0.274036	0.835701	-0.776423	0.498206	0.474065	0.0538967	2.44193	0.268676	0.80242	1.55127	-0.775917	0.0972919	-0.790172	-2.84244	0.605793	-0.140326	-0.788594	0.729965	-2.31915	0.142201	-0.845473	0.420062
CLEC4F	1.04705e-06	-5.98003	3.48599e-05	1.31796	0.472569	-1.91265	-1.59917	-4.34055	-2.46302	0.398109	-0.654097	0.42292	-0.769094	-2.86564	-1.50947	-2.41095	1.05191	1.05191	1.05191	0.365464	0.75648	-2.28312	-1.3204	-1.49882	1.02185	-0.0488636	-1.53384	-0.582224	-3.22157	-1.49508	0.865037	-1.87496	-1.84933	-0.148998	0.268676	-1.08001	-2.49476	-2.9915	-0.789717	-2.46126	-0.876407	0.391179	0.604204	-0.0480481	1.84986	-0.992975	-0.510505	-2.50511	-1.57467
AL138694.1	1.06061e-06	-5.97444	3.52543e-05	0.882087	2.2774	2.6845	1.7492	2.30519	0.307349	2.63141	0.328911	1.00615	1.35465	2.46975	0.856257	0.153835	0.446922	0.446922	0.446922	1.59074	3.07496	0.578434	1.01728	0.68692	1.71671	2.16452	1.97461	-0.759719	1.61227	1.22643	2.69062	1.4244	0.188364	2.30455	-0.28703	2.32548	2.1175	1.40396	-0.00842391	1.14346	2.5169	-0.387314	2.19669	0.321548	1.77296	1.08813	0.142201	1.93012	1.25579
BOLA3	1.06452e-06	-5.97285	3.5327e-05	-0.361435	1.1869	0.996797	1.23338	0.967696	1.19755	0.964945	1.88907	2.03608	1.30321	0.817443	1.17834	1.3215	1.47686	1.47686	1.47686	1.24223	0.154643	2.03837	1.72103	1.8282	1.48731	0.0609361	1.40466	1.9258	0.835701	0.912091	1.73153	1.13278	1.49194	0.882943	0.400796	1.0753	0.186351	1.44501	1.43021	1.22733	1.43633	1.04874	1.32231	1.65812	0.762156	1.00914	1.00519	0.99531	1.3932
HIF1A-AS3	1.07375e-06	-5.9691	3.55758e-05	0.662165	-0.629667	0.0320472	-1.00436	-0.418203	-1.16688	-0.896434	-2.71037	-0.159445	-2.12973	-1.48679	-0.855967	-1.42302	-1.07265	-1.07265	-1.07265	-1.42446	0.210975	-1.46775	-0.910302	-1.09534	-0.668387	-0.167713	-1.06821	-2.59648	-1.33486	-0.978629	-0.452239	-1.65612	-2.5054	-0.561643	-2.98414	-0.483742	-1.20575	-1.65887	-0.887194	-1.02879	-0.37728	-1.54015	-0.426831	-1.93689	-0.900036	-1.50876	-1.51224	-1.72288	-1.57467
B3GNT5	1.09719e-06	-5.95972	3.62938e-05	0.659964	5.28288	6.05156	4.58965	5.6547	4.61817	4.38073	3.13859	2.86051	4.83456	4.73452	4.61185	5.02847	4.07419	4.07419	4.07419	5.33227	5.62593	3.57912	4.86729	4.62049	4.39705	7.32237	4.14921	3.66579	4.29287	6.16322	5.16312	4.94146	3.37398	5.27191	3.8143	5.80198	5.92938	4.24729	3.54247	5.26453	5.42209	4.55092	3.93435	2.837	4.14067	4.97038	3.9692	4.78689	3.83028
ZC3H12A	1.14713e-06	-5.94039	3.78848e-05	-0.380257	5.63828	5.61874	6.52811	6.61243	6.0656	5.6622	5.60882	4.8861	7.09145	5.13514	6.68778	6.25748	5.39905	5.39905	5.39905	5.66653	5.40378	4.93936	6.16852	6.02025	5.66774	5.88982	6.31839	5.29893	5.34953	5.63894	6.73111	6.53603	5.10436	5.00791	4.62849	6.17259	6.76943	5.23813	5.27187	6.17837	5.87707	4.85766	5.33824	5.52179	4.8569	6.07645	4.68664	6.45598	5.19972
DBF4B	1.15844e-06	-5.93613	3.81968e-05	0.438999	3.24502	3.38255	3.25358	3.34384	2.72373	3.89058	2.98999	3.31242	3.03568	3.16436	2.78493	3.04109	3.05703	3.05703	3.05703	1.84983	3.03651	3.59784	2.94205	2.67071	3.0636	3.08037	2.48736	2.71876	3.48717	3.25048	2.9027	3.03151	3.00175	3.17364	2.63487	3.19029	2.70409	3.23941	2.79236	2.21204	3.1203	2.82275	3.27667	3.0364	3.91947	2.65924	2.59056	1.99274	3.18863
TNNI2	1.21775e-06	-5.91444	4.00883e-05	0.477784	0.792523	1.07292	0.884321	0.595407	-0.0388721	0.501159	0.328911	0.836657	1.19449	0.625433	1.2411	0.776898	-0.207517	-0.207517	-0.207517	0.869448	1.69631	-0.488516	-0.179288	1.55678	-0.0477314	0.586704	0.483147	-0.582224	0.580624	0.345927	1.84535	0.804269	0.188364	0.951492	0.0712903	0.698642	0.0140993	-0.108229	0.242623	0.0882981	0.922741	0.926339	0.042475	0.280205	0.318384	0.194474	0.267824	0.251556	0.00561075
TSPAN7	1.24626e-06	-5.90439	4.09609e-05	1.08843	0.479384	-1.22503	-1.37255	-0.191909	-0.68642	-2.03209	-0.436539	0.0411728	-0.0815063	0.743676	-0.855967	0.522151	-2.1399	-2.1399	-2.1399	0.481329	-0.398683	-0.747372	0.14085	0.580784	-0.0477314	-0.167713	-0.796922	0.527222	-0.319495	-0.599106	0.272611	-2.13302	-0.304181	0.334376	0.66886	-0.366533	-1.20575	-2.30673	-1.85666	-0.790172	-2.12349	-0.55552	-0.0159224	-0.976244	-0.196457	-0.456046	0.142201	-1.53446	1.0715
TRIM10	1.25343e-06	-5.9019	4.11128e-05	0.884102	3.5146	1.9985	2.86624	2.0852	0.855565	2.06906	2.101	2.72133	1.58746	4.65124	1.11272	3.85974	2.03464	2.03464	2.03464	4.87278	2.75325	2.63577	3.97413	3.87052	3.51767	3.21711	2.05673	3.12896	3.76396	2.49133	2.88949	2.31076	3.81442	3.30389	3.56015	2.34279	1.83635	1.44501	0.642535	2.12725	1.97166	3.28177	1.88184	0.00367044	2.89905	2.35298	3.29108	2.20598	3.43134
AKAP13	1.25488e-06	-5.9014	4.11128e-05	0.406953	9.82337	11.1049	9.55601	10.7877	9.43571	9.92886	8.75586	8.901	9.42166	9.77256	8.73813	9.53482	9.3704	9.3704	9.3704	9.46534	10.062	9.44737	8.78301	9.01388	8.45812	10.0761	8.67765	8.28184	9.15745	9.53116	9.34439	9.78907	9.50863	9.97702	9.30804	10.2073	10.9579	9.10144	9.04742	9.73598	10.2532	9.42119	9.31834	8.61232	9.49839	9.744	9.37015	9.81902	9.48103
TRPC6	1.2741e-06	-5.8948	4.16759e-05	-0.638614	0.409926	-1.91265	0.00542681	1.10189	0.1446	0.343685	0.406014	1.70279	0.38223	-1.03337	0.815594	0.696878	-0.0938156	-0.0938156	-0.0938156	1.20899	0.75648	-0.569748	1.01728	1.98899	0.215045	0.658332	0.944114	0.870077	0.635375	0.256548	1.92519	0.977857	0.155904	0.613577	-0.220784	0.586817	0.930739	0.0597652	-0.454766	1.83813	0.816079	-0.166887	0.254956	0.148553	-0.544624	-0.699675	0.437861	0.0890885	-0.216391
TNFSF10	1.27634e-06	-5.89404	4.16828e-05	0.61549	8.82638	9.19454	8.52071	8.92607	7.81175	9.43243	8.11305	7.76145	8.08025	8.99787	7.75385	8.082	8.61084	8.61084	8.61084	8.12286	8.93432	8.63977	8.04467	7.69073	7.89734	9.40229	8.25092	6.86701	9.04898	8.26987	8.41807	8.43125	7.84398	7.77457	6.93682	9.74051	9.28251	7.88116	7.6153	8.55027	8.97564	7.41021	8.35031	7.87474	9.60166	8.38129	7.19759	8.26216	8.64747
CDK1	1.28314e-06	-5.89172	4.18386e-05	-0.72288	0.804336	0.0320472	0.158404	-0.842386	1.88814	-0.896434	1.94181	1.44412	-0.225162	-1.03337	1.04398	1.05883	1.21526	1.21526	1.21526	0.101419	-0.485548	3.29355	1.04823	1.76498	1.24413	-0.0488636	0.992612	1.35745	0.881719	-0.978629	0.918036	1.53968	1.22094	-0.561643	0.314074	0.698642	0.722579	0.346458	0.374645	0.785978	0.660365	0.48089	1.47853	-0.215355	-0.544624	0.146068	-0.230091	0.932802	1.03836
MELK	1.31512e-06	-5.88103	4.28002e-05	-0.521129	1.40913	-1.05335	0.839761	0.819733	2.03478	1.52552	1.87557	2.22656	1.0769	0.705329	1.5446	1.3739	1.84803	1.84803	1.84803	1.61631	0.463719	3.47158	1.77752	2.1949	1.46223	0.726571	1.58944	1.86585	0.580624	0.509613	2.28935	1.56167	2.33445	0.526378	1.26217	1.15589	1.31181	1.15457	0.955311	1.11438	1.75779	0.988839	2.10376	1.4124	0.402484	0.836871	1.32724	0.964395	1.25579
PANK2	1.3168e-06	-5.88048	4.28002e-05	0.345011	6.37216	6.77723	6.17376	6.76521	6.05036	6.61343	5.71679	5.3875	6.07291	6.2427	5.7545	5.85144	6.11233	6.11233	6.11233	6.1253	6.43507	6.14406	5.49981	5.80142	5.64702	6.46505	5.69624	5.49719	5.95155	6.15551	6.18258	6.23103	5.96145	6.07656	6.27963	6.79978	6.59502	5.96731	5.70084	6.0566	6.37661	5.92197	6.22838	5.58894	6.43087	5.8506	6.16868	6.07778	6.23394
PPP1R8P1	1.3257e-06	-5.87755	4.30214e-05	0.674877	-0.43081	-1.05335	-2.19903	-0.686718	-0.68642	-1.54763	-1.47532	-0.776747	-0.384719	-1.31931	-1.73251	-1.83402	-1.18462	-1.18462	-1.18462	-1.42446	0.367867	-1.06306	-1.3204	-1.21771	-1.36734	-2.99075	-1.53384	-0.759719	-1.5624	-1.21387	-0.452239	0.106256	-1.72321	0.655276	-1.08014	-1.50644	-0.0804082	-1.84426	-1.50758	-1.89036	-2.12349	-0.10031	-1.26169	-2.39159	-0.802644	-1.22794	0.0750347	-1.36784	-0.925145
DRAIC	1.33048e-06	-5.87599	4.31082e-05	0.542563	3.67472	3.19088	2.72638	2.90384	2.98656	2.96463	2.32599	3.95835	4.68183	2.9515	3.21833	3.8083	2.13134	2.13134	2.13134	3.75084	4.5297	1.90942	3.09065	3.24036	3.05524	4.51768	3.69761	2.74395	3.0366	3.76165	4.67849	3.48712	1.79569	5.24826	3.59734	3.30074	4.12646	2.62287	2.44724	3.80048	3.78025	3.96489	3.17592	2.20273	2.13441	2.57032	3.9692	3.84143	3.11106
AC012645.2	1.33566e-06	-5.8743	4.32082e-05	0.903699	0.244176	0.0320472	-2.19903	1.14398	-1.48448	-1.76962	-3.07931	-1.30196	-1.29462	-0.32913	-1.73251	-0.842106	-0.968736	-0.968736	-0.968736	0.172097	-0.57798	-1.31987	-1.67734	-0.23679	-0.783666	-0.29724	-0.716755	-1.64392	-1.13835	0.724842	0.693249	-2.13302	-1.13612	2.35603	1.39486	-0.751289	0.340214	-0.517488	-0.789717	-1.672	-1.0009	0.827198	1.12023	-1.93689	0.229077	-1.67274	1.5661	-1.93965	0.313282
MX2	1.34548e-06	-5.87112	4.34573e-05	0.596587	10.4522	11.0414	10.6026	9.64938	9.10501	11.0163	9.3656	7.91652	10.313	10.6812	9.88561	9.58848	10.1326	10.1326	10.1326	9.18066	11.2049	10.066	10.0631	8.89296	9.74416	11.167	10.0029	8.40493	10.7086	9.88935	10.2277	10.1605	9.07277	9.85105	8.67773	10.9572	10.5362	10.1464	9.77841	10.1705	10.6638	9.1136	10.4897	10.1577	10.6997	10.1696	8.66989	9.6608	10.4831
NCKAP1L	1.36072e-06	-5.86623	4.38749e-05	0.284995	8.70563	9.04028	8.57545	8.89771	8.5936	8.68528	7.90551	7.96412	8.82853	8.61229	8.29002	8.3396	8.4355	8.4355	8.4355	8.6192	8.79212	8.6852	8.00258	8.10148	7.82755	9.06157	7.99566	7.62225	8.3643	9.10169	8.48875	8.74666	8.63162	8.56697	8.31567	8.77598	8.81622	8.32504	8.28186	8.6143	8.41646	8.38626	8.13573	8.01661	8.67445	8.6782	8.30133	8.86317	8.44463
MAD2L1	1.36268e-06	-5.86561	4.38749e-05	-0.550725	0.842612	-0.410897	0.538938	-1.01691	1.70556	0.102796	1.77742	1.76081	0.732608	0.142039	1.21006	1.26712	1.43957	1.43957	1.43957	1.10445	-0.239227	2.88475	1.64209	1.61171	1.3573	-0.774792	1.40466	1.70408	0.881719	0.58498	1.32362	0.689116	1.12359	0.051699	0.442277	1.0753	0.83041	0.941605	0.374645	0.74862	0.660365	0.792577	1.03651	0.993522	0.133874	0.532428	0.00458762	0.571763	0.420062
H3C2	1.37961e-06	-5.86024	4.43504e-05	-0.873026	4.91177	3.93495	5.39188	4.16745	6.4216	3.58518	5.57687	3.96659	4.75064	2.15103	5.37181	5.62964	5.31919	5.31919	5.31919	4.92743	1.31453	7.16843	5.36959	6.56248	5.626	3.04071	5.36663	6.07295	3.73918	3.59845	3.96243	5.77367	5.10117	3.5777	4.62399	4.05071	4.82206	4.86543	3.84527	4.58922	4.37918	5.12621	5.78027	3.90522	2.52989	4.08123	3.73906	4.39026	5.15598
CHROMR	1.40438e-06	-5.85252	4.50761e-05	0.686859	5.41071	5.56538	5.02979	2.80236	4.06405	6.01111	4.88567	4.28925	4.88354	5.94239	4.67003	3.50184	5.23464	5.23464	5.23464	3.24429	5.9801	5.52782	5.13929	3.1689	5.37366	5.08383	4.71488	4.18745	5.99537	4.07437	4.58736	4.60272	4.8793	3.38668	4.22113	6.11202	4.29593	5.26846	4.72815	4.54904	5.26876	4.04796	4.81126	5.40163	6.13994	4.8603	3.88836	4.64787	5.48598
CXorf21	1.41448e-06	-5.8494	4.53295e-05	0.473585	4.62609	5.32779	4.25833	4.23716	3.98608	4.84964	4.0104	2.99551	3.97492	4.98716	4.20665	3.90495	4.66078	4.66078	4.66078	4.07056	4.84212	3.8174	3.4792	3.94014	4.0924	5.15365	4.11128	2.81701	4.62256	3.86354	4.42291	4.70011	3.74792	4.2603	3.26884	5.13806	4.96201	3.99425	3.67644	4.78644	4.94729	3.80907	4.11529	3.8743	5.042	4.03877	3.85871	4.31261	4.4376
FBXO7	1.4425e-06	-5.84088	4.61556e-05	0.728617	8.93967	7.7536	8.83441	8.42581	7.34787	7.76833	7.37044	7.32103	7.3358	9.64422	7.04463	9.52236	7.91757	7.91757	7.91757	9.8611	7.68108	8.39451	9.07901	9.3018	8.40975	8.74451	8.21384	8.61682	8.14245	8.73939	8.41259	7.70545	8.83303	9.05509	10.2157	8.44345	8.69441	7.47089	7.04504	7.6453	7.74874	9.12604	8.0382	6.68443	8.91423	7.89363	9.18259	7.87701	9.01143
MTFR1	1.45127e-06	-5.83825	4.63638e-05	-0.296034	2.50877	2.31294	2.33513	1.85116	2.56114	2.37067	2.30601	2.95466	2.53155	2.65218	2.53234	2.02535	3.09349	3.09349	3.09349	2.27605	2.37601	2.79025	2.44546	2.3856	2.80891	2.51255	2.69944	2.31013	2.44068	2.54893	2.54659	2.50486	2.93636	2.26469	2.54252	2.82173	2.20024	3.02602	2.58991	2.56353	2.53943	2.72515	3.07461	2.71819	3.03041	2.97545	2.62619	2.38006	2.83045
ING4	1.48026e-06	-5.82966	4.72165e-05	0.215469	4.32858	4.36027	3.86692	4.37609	4.06405	4.69791	4.26444	3.80134	3.56958	4.27282	3.83165	3.90495	4.29902	4.29902	4.29902	3.97	4.32159	3.76866	3.84351	4.2768	3.70037	3.98158	3.90504	3.61206	4.12126	4.00746	4.02416	4.27355	4.31282	4.56381	4.2389	4.43268	4.89218	4.30974	4.09541	4.24474	4.57451	4.21087	4.21069	4.10786	4.29442	4.24531	4.17566	4.41047	4.24407
CD37	1.49513e-06	-5.82532	4.76169e-05	0.284831	8.24962	9.16182	8.63228	8.69895	8.02027	8.43111	7.68734	6.95486	8.4848	8.50423	8.19216	8.536	7.67421	7.67421	7.67421	8.12815	8.2844	7.62434	7.83996	8.13312	7.76547	8.46974	7.76515	7.6881	8.05509	7.99901	7.89551	8.37103	7.68137	8.01925	7.94174	8.28731	8.45481	7.89419	7.93565	8.38549	8.43235	7.95377	7.67038	7.73995	7.97185	8.09472	7.94125	8.34175	7.98192
H2AC14	1.50515e-06	-5.82242	4.78619e-05	-0.916025	0.715556	-0.410897	1.04995	-0.300624	2.05019	-0.548841	1.41664	-0.159445	-0.0815063	-1.31931	1.4145	1.23914	0.623553	0.623553	0.623553	0.869448	-2.85718	2.91492	1.19371	2.51611	1.62928	-1.21229	1.15056	1.99739	-0.0366934	-0.298914	-0.32362	1.4244	0.719402	0.433569	-0.862477	0.333234	-0.0804082	0.585515	-0.00842391	0.36008	-0.144031	1.49876	0.819888	-0.157403	-1.86826	0.455068	-1.73521	0.145302	0.470627
LINC01127	1.51322e-06	-5.8201	4.80442e-05	0.890704	4.76438	5.07131	3.56549	4.73741	3.7564	4.87864	3.65919	2.86051	6.39807	3.95917	3.32358	4.54228	3.39561	3.39561	3.39561	3.76234	5.72839	1.0556	3.21176	3.10013	2.49942	5.77367	3.73016	1.01512	2.07527	3.1671	3.40781	4.2568	1.79569	6.79515	2.6259	4.55659	5.90492	3.35161	3.44571	4.91847	3.97047	2.81414	3.98734	2.37952	1.37529	4.07477	4.59671	3.30698	2.45687
CEP97	1.52797e-06	-5.81589	4.84376e-05	-0.399506	4.86929	4.78767	4.94819	5.08402	5.57071	5.16422	4.76463	4.11114	4.89227	4.71777	4.72596	5.24616	4.85029	4.85029	4.85029	5.1669	4.46168	4.87366	4.61167	4.62495	4.44584	4.40767	5.49422	4.24447	4.12126	4.5445	4.89223	5.47513	4.60201	4.94625	4.58285	5.7894	6.77787	4.91922	4.96827	5.29401	5.06453	4.54574	4.69547	4.6706	3.95471	5.28733	4.47172	4.91165	4.00341
MCM4	1.53985e-06	-5.81252	4.8739e-05	-0.561303	3.84398	3.31362	4.43348	3.77732	5.11418	3.38414	4.11744	4.50265	3.29464	2.99983	4.15869	4.37238	4.31969	4.31969	4.31969	3.17714	2.26065	6.41408	3.92496	4.52594	3.51157	2.1397	4.061	4.36576	3.40289	2.58609	3.74499	4.48395	4.66536	3.01453	3.66898	3.36147	3.77483	4.02841	3.98267	3.59481	2.79481	3.89317	4.46136	3.76615	3.47598	3.42925	3.40486	3.61134	3.90572
AL023653.1	1.55718e-06	-5.80766	4.91762e-05	0.356102	1.98722	1.89744	2.45815	1.60216	1.42735	2.60851	1.35964	0.724498	2.55373	1.68333	1.64085	1.54363	1.02699	1.02699	1.02699	1.36799	1.96554	1.23373	1.32586	1.48012	1.60656	2.77673	1.79484	1.26764	1.83913	1.5979	1.28379	1.89184	1.58021	1.84561	1.30777	2.09964	1.86199	1.7698	1.40983	1.80212	1.81431	0.926339	2.25959	1.37362	1.75707	1.83218	1.5661	2.06738	1.3398
MAP2K1	1.55845e-06	-5.80731	4.91762e-05	0.275816	5.55095	6.24083	5.73834	5.49515	5.23877	5.68153	5.01436	5.30866	5.72265	5.67484	5.25501	5.5191	5.56838	5.56838	5.56838	5.53023	5.64138	5.6348	5.16775	5.16601	4.33277	5.55418	4.70945	4.8774	4.83921	5.36999	4.93143	5.40083	5.36971	5.44089	5.5039	5.15532	5.44169	5.07608	5.06917	5.35587	5.28218	5.56231	4.88492	4.95139	5.68776	5.53181	5.62196	5.55214	5.30449
MANBA	1.60738e-06	-5.79388	5.05764e-05	0.311129	7.02675	7.40034	6.64116	7.0777	6.97105	6.77188	5.71963	5.7648	6.99547	7.05764	6.37182	6.68249	6.66221	6.66221	6.66221	7.11977	7.19123	6.52522	6.32833	6.6471	6.41671	7.12001	6.5133	6.08532	6.46658	7.32403	7.19423	7.15119	6.27514	7.61103	6.61107	7.02565	7.77206	6.31813	6.45684	7.21644	6.9861	6.87353	6.58154	5.83183	6.81053	6.55499	7.07349	6.99312	6.89174
RECQL4	1.60775e-06	-5.79378	5.05764e-05	-0.534739	1.38831	0.644387	1.67505	0.819733	2.47241	1.03531	2.43118	2.76923	1.49879	-0.178113	2.11304	2.22398	1.1475	1.1475	1.1475	1.10445	1.06232	2.62668	1.83188	2.27649	1.60656	-0.29724	1.86164	2.76051	0.688124	-0.0505548	2.56332	2.07118	1.69761	0.433569	0.92441	1.2689	1.81025	1.65202	1.48966	0.959505	1.50661	0.861008	1.6759	0.711941	0.82446	0.86705	0.931161	1.19494	1.3398
SORT1	1.62082e-06	-5.79027	5.09096e-05	0.734795	7.87753	8.89057	6.68275	9.13405	7.07217	6.84043	6.17207	6.90105	8.61871	6.6159	6.4453	7.2226	6.73951	6.73951	6.73951	7.22689	8.46915	7.09209	6.14008	6.72598	5.72158	8.6739	6.10887	5.65162	5.84669	7.20365	7.163	7.56554	6.78897	7.77339	6.40949	8.1788	9.23577	5.91987	6.02019	7.71202	7.01953	6.72136	6.58707	5.37611	7.12674	7.01237	6.57943	7.47318	6.97729
ZWINT	1.63807e-06	-5.78567	5.1373e-05	-0.740423	0.935276	-0.634794	1.04995	0.00365547	2.26353	-0.449386	1.82031	1.53559	1.30321	-0.251646	1.70904	0.47495	0.895482	0.895482	0.895482	0.172097	-1.15753	3.38261	1.04823	2.3101	0.62976	-0.97702	1.52495	1.77098	0.338127	-0.776423	0.810016	2.10152	1.31214	0.282099	0.123226	0.80242	0.186351	0.852873	0.495591	0.710268	0.700897	0.957927	2.64601	0.512163	-0.259691	0.836871	-0.317643	0.487292	0.197963
DISC1	1.65411e-06	-5.78144	5.17968e-05	0.484275	6.78934	7.4422	6.61826	7.66994	6.15651	6.62131	5.57374	5.33754	6.95854	6.34134	6.53492	6.23994	6.11159	6.11159	6.11159	6.34579	6.85856	6.17712	6.17904	5.80927	5.99186	7.58498	6.40269	4.79139	5.77535	6.90684	6.76405	7.23313	5.61927	6.91853	4.75528	7.58292	7.70988	5.68304	5.60551	7.30436	6.80621	5.45571	6.51865	5.72419	6.62989	6.86408	5.88597	7.02015	6.37668
GIMAP4	1.6778e-06	-5.77526	5.2418e-05	0.506705	8.40084	9.46669	8.26935	8.63259	7.85407	8.45558	8.03271	7.92553	7.32617	8.74093	7.74542	7.40206	8.61698	8.61698	8.61698	7.69165	8.89591	8.51174	8.24535	7.51064	7.25588	8.98332	7.8445	7.26965	8.34132	7.17192	7.51229	7.83552	8.09615	7.57617	7.62203	9.34379	8.83576	8.04512	7.82604	7.65763	8.55764	7.81754	8.15592	8.14648	8.93567	7.73648	7.86409	8.10583	8.12912
LGALS3	1.67905e-06	-5.77494	5.2418e-05	0.633547	5.96008	5.59634	4.98446	4.53084	4.49126	5.24253	5.0051	4.75663	4.76497	5.99003	4.72321	5.55216	5.74018	5.74018	5.74018	7.01971	5.10251	5.09241	5.55068	6.53906	5.33619	5.58207	4.26726	5.1977	5.23454	5.58029	5.07835	5.43549	5.77899	6.37214	6.77984	5.79256	4.09977	4.66935	3.92281	4.85396	4.18568	7.03079	4.84652	4.25915	6.60181	4.5613	7.33671	4.8933	5.64304
AC012645.3	1.70273e-06	-5.76885	5.30767e-05	0.382413	1.34886	2.1111	1.08855	1.47602	1.1696	1.87164	1.12892	1.03778	1.78788	0.403888	1.38701	1.18151	0.656425	0.656425	0.656425	1.36799	0.317442	0.721873	1.19371	1.31338	0.9871	1.36291	1.23362	1.17187	0.635375	1.12907	0.752814	0.72853	0.867074	2.12327	1.47699	1.94948	0.777501	0.91263	0.607178	1.08471	0.922741	1.26621	-0.0159224	0.680507	0.361047	0.806048	0.89267	1.08427	1.22666
GIPC3	1.71632e-06	-5.7654	5.34191e-05	-0.656648	2.16106	0.740882	3.55863	3.53787	2.34075	2.25748	1.82031	2.22656	0.948865	1.98489	1.93466	3.57081	1.65007	1.65007	1.65007	2.85073	0.934317	1.43454	3.19803	2.66206	1.93296	1.2745	1.4916	3.72182	0.881719	1.17857	2.54659	2.51616	2.06407	2.6104	2.00577	0.945305	3.58004	0.941605	2.38597	2.41644	2.3863	2.00143	0.786106	0.802331	0.0838085	1.27979	2.12654	2.81208	1.93349
STPG4	1.74319e-06	-5.75865	5.41286e-05	0.496823	1.10085	2.35927	0.839761	0.533417	-0.105608	0.450554	-0.0804398	1.1578	1.24988	0.88762	0.49347	0.959447	0.329533	0.329533	0.329533	1.53819	1.38966	-0.569748	0.664728	0.878299	-0.199563	1.77101	0.448797	0.319441	-0.811046	0.43009	1.47278	0.689116	-0.446448	1.63249	1.06382	1.88001	0.340214	0.470933	0.242623	0.670869	1.23023	1.0191	0.716073	-0.87937	1.04982	0.641205	0.637286	0.397565	0.741638
AIF1	1.74438e-06	-5.75836	5.41286e-05	0.449486	5.35515	5.57523	4.63924	6.15935	4.59209	5.58072	5.17167	4.79184	4.25084	5.81987	4.62662	5.02847	5.51785	5.51785	5.51785	5.86891	4.47036	5.00043	4.69224	5.38155	4.34311	5.28674	3.92704	4.90372	4.65273	5.2036	5.00982	5.04266	5.06666	4.68954	5.22814	4.44876	5.38313	4.21798	4.26947	4.93934	4.68219	5.67113	3.72298	4.12255	5.88246	4.44358	5.51989	4.89535	4.92391
DIP2B	1.76777e-06	-5.75257	5.47715e-05	0.399659	8.33787	9.03969	8.30128	8.65095	7.85708	8.33303	7.02077	6.61942	8.08597	8.52588	7.67932	8.10179	7.81439	7.81439	7.81439	8.1348	8.75338	7.79603	7.79077	7.83213	7.62668	9.12279	7.86967	6.73343	7.83812	8.26808	8.25448	8.44407	7.38994	8.44615	7.70212	8.8232	8.98068	7.66825	7.57068	8.48397	8.61145	7.81566	8.01081	7.34631	8.22325	8.24052	7.5836	8.13019	8.03591
AF111167.2	1.79877e-06	-5.74502	5.5648e-05	0.493622	1.55324	2.44771	0.361182	0.595407	0.746277	1.16652	1.91568	1.32097	2.50902	1.51617	1.11272	1.02646	1.30092	1.30092	1.30092	0.781763	2.33857	0.578434	0.303581	0.848114	0.487841	1.13081	1.17178	0.36346	0.523713	-0.298914	1.67106	1.72648	1.17309	2.23749	0.92441	1.2689	1.88718	1.34011	0.868386	1.54316	1.17375	0.683432	0.152624	1.16231	0.520099	1.18714	0.490361	1.54761	0.897613
AMIGO2	1.80174e-06	-5.74431	5.56562e-05	-0.310629	3.12198	3.35993	3.4954	3.04382	3.53332	3.26473	3.55301	3.53933	3.623	3.27323	3.23384	3.14274	3.05086	3.05086	3.05086	2.70341	2.54988	3.2704	3.52941	3.09371	3.32243	2.49309	3.51044	2.88654	3.23578	2.6401	3.15534	2.82881	3.78022	2.26469	2.6259	4.13264	3.94643	2.89142	3.48032	3.43937	3.44656	2.4969	3.36513	3.59968	2.68905	2.81442	2.38408	3.44214	3.25505
CLPTM1L	1.80835e-06	-5.74272	5.57765e-05	-0.288332	5.75483	5.93529	6.3279	6.01087	6.74233	5.79236	5.86923	5.626	6.04578	5.54786	5.97247	6.23552	5.88504	5.88504	5.88504	5.83391	4.88387	5.80859	5.8464	6.21761	5.64702	4.98282	6.28957	6.29661	5.47304	5.43254	5.4797	6.18484	6.06887	5.31808	5.59982	5.38789	5.69806	5.83748	5.55885	5.74184	5.4506	5.66277	5.42312	5.61515	5.74727	5.76203	5.54803	5.75995	5.68647
BVES	1.81913e-06	-5.74014	5.59727e-05	-0.822766	-0.545399	-2.24098	-0.85039	-1.72004	0.989486	-2.03209	0.709569	1.18631	-1.00806	-1.89452	0.640406	-0.0382291	-0.538492	-0.538492	-0.538492	-0.134116	-0.0956537	-1.46775	-0.252818	0.505424	0.583988	-0.774792	0.868166	0.128561	-1.13835	-2.30715	1.24283	-0.772943	-1.40001	-1.00563	-2.6004	-0.751289	0.0140993	-0.684533	-0.789717	0.0272092	-0.464237	-2.50989	-1.26169	-0.546208	-2.08021	-0.613812	-0.733186	-0.303805	-2.78774
SPSB1	1.82016e-06	-5.73989	5.59727e-05	-0.357575	1.97132	1.97884	2.23546	0.920042	2.55034	1.59706	2.35545	2.21276	1.82482	1.64332	2.4283	2.33388	2.19984	2.19984	2.19984	1.59074	1.52913	2.6448	2.63064	2.68785	2.30152	1.77101	1.92549	2.13073	2.32886	1.27275	2.24855	2.44696	2.46604	1.43117	1.19094	2.07912	1.27411	1.80176	1.3682	1.6279	2.42311	1.78954	2.14432	2.09955	1.99237	1.75359	1.5661	1.79608	1.95141
IGKV2-30	1.83877e-06	-5.73547	5.64603e-05	-1.21786	2.12543	2.57096	2.05231	0.595407	3.87797	1.50087	1.77742	0.724498	3.34638	-0.79483	3.04448	2.92295	0.589915	0.589915	0.589915	1.27471	-4.34055	0.0894568	3.15603	2.27649	1.4367	1.59966	3.00151	1.66943	0.788166	-4.34055	0.865037	3.03936	0.784549	-0.382196	1.41583	-1.27753	1.27411	1.25032	1.34692	0.203224	3.22823	1.64177	-0.349697	1.85399	0.0838085	4.1656	0.267824	3.10919	1.76139
ZBP1	1.84708e-06	-5.73351	5.66309e-05	0.728184	8.5201	9.21634	8.50474	8.14085	7.46748	9.11858	7.28084	6.36577	8.22116	8.64684	7.72051	7.67466	8.19451	8.19451	8.19451	6.24284	8.98644	8.04292	7.9638	7.15646	7.98194	9.05246	8.13282	6.51237	8.78295	7.45723	8.17811	8.2393	7.33799	7.14122	5.75396	9.51503	8.92798	8.13155	7.79052	8.43446	8.93228	6.18147	8.58636	7.95575	8.82942	7.97534	5.49923	7.8196	8.34248
UBE2T	1.85057e-06	-5.73269	5.66534e-05	-0.625024	0.157439	-1.64537	0.361182	-1.72004	0.820048	-0.896434	0.985565	0.90686	-1.65257	-1.16926	-0.0664212	0.153835	0.288181	0.288181	0.288181	0.239474	-1.0215	1.90942	0.582559	1.09942	0.914989	-1.84325	0.893929	1.48248	-0.427586	-0.441216	1.11247	0.606901	0.697016	-0.881184	-0.429412	0.108709	-0.832372	-0.598594	0.0454021	-0.173303	-0.0739705	0.138963	0.751515	0.43891	-0.135879	-0.313844	-0.733186	-0.462784	-0.0646613
CD300LF	1.85845e-06	-5.73085	5.68101e-05	0.426825	6.52966	6.9417	5.98589	7.03988	6.34636	6.51758	5.23115	4.72783	6.48142	6.38673	5.61188	6.02225	6.02534	6.02534	6.02534	6.48677	6.96425	5.75539	5.76957	6.12938	5.71363	6.95024	5.69898	5.56591	6.13729	6.70204	6.60749	6.57372	5.46304	6.38923	6.30866	7.16542	7.08868	5.83168	5.15736	6.92666	6.5272	6.38617	5.89168	5.34261	6.77745	5.87957	6.24323	6.38698	5.78091
ALDH18A1	1.86685e-06	-5.72889	5.69819e-05	-0.398116	3.55825	3.05671	4.91367	3.1714	4.61817	3.45645	3.7836	3.89499	3.01984	3.51965	3.81628	3.84124	3.72105	3.72105	3.72105	3.12465	2.8272	4.64976	3.96605	3.81308	3.58892	2.60609	4.11676	3.64364	3.65556	3.40405	3.15534	3.78693	4.35454	2.5117	3.56015	3.20929	2.64624	4.19108	4.05662	3.50245	3.44059	3.55912	3.63557	3.991	3.57897	3.859	3.38419	3.67478	3.55951
SAYSD1	1.87293e-06	-5.72748	5.70828e-05	0.284641	3.02594	2.67232	2.07171	2.26761	2.76166	3.23514	3.28355	3.17693	2.88639	3.30563	2.92532	2.38585	3.27379	3.27379	3.27379	2.17642	2.88027	3.36633	2.86593	2.3856	2.90512	3.10621	2.56158	3.14166	3.53115	2.80679	2.59622	2.5822	2.70354	2.523	2.55203	3.62477	3.57229	3.26829	2.84643	2.68716	1.67883	2.5288	3.17592	2.92681	2.83995	3.04969	2.55403	2.45981	2.71983
EEF1A1P10	1.92156e-06	-5.71635	5.84781e-05	0.523793	1.22059	0.429568	-0.711284	1.26335	0.024913	0.166893	0.204934	0.940721	1.86085	0.954541	0.686237	0.776898	0.245608	0.245608	0.245608	0.365464	1.61514	0.942973	1.07852	0.505424	0.536715	2.37049	0.182287	0.0766166	1.05238	1.17857	1.06627	0.164897	0.188364	2.65219	0.597215	1.30469	1.83635	0.430623	-0.0643362	0.146905	0.575715	0.792577	0.642465	0.772826	0.274421	0.709419	0.727531	1.05522	0.256774
PLK4	1.92444e-06	-5.7157	5.84791e-05	-0.521291	1.49624	-0.410897	1.16278	0.766836	2.34075	0.852505	2.45859	2.41901	0.56803	0.781031	1.17834	1.88795	1.47686	1.47686	1.47686	1.4556	1.31453	3.36086	1.3755	2.35372	1.71671	0.258256	2.01038	1.35745	0.523713	0.96947	2.09591	1.8388	2.37732	0.984583	1.59203	0.698642	0.544027	1.70368	1.25853	0.857912	1.75779	1.66109	2.24722	1.37362	1.0235	1.25718	1.04083	1.05522	1.00444
PRDX6	1.93791e-06	-5.71267	5.88013e-05	0.546636	7.20512	6.35671	6.88062	6.92085	6.26119	6.44996	6.04826	5.83512	6.30961	7.64496	6.21943	7.06219	6.4211	6.4211	6.4211	7.89698	6.75046	6.49994	7.10366	7.6886	7.05087	7.3877	6.75694	6.94603	6.2191	6.812	6.24873	7.0253	6.86279	7.22322	7.67083	6.56542	7.18006	6.07584	6.12858	6.72804	6.54052	7.5244	6.0812	6.0036	7.67963	6.41135	8.33873	6.6699	7.07347
PRTFDC1	1.96114e-06	-5.70749	5.94184e-05	-0.642149	0.162804	-0.634794	0.746287	1.14398	0.307349	-1.03378	0.247454	0.60288	-1.65257	-1.48679	0.593071	0.0286741	0.0615178	0.0615178	0.0615178	1.36799	-0.485548	-0.269115	0.495426	1.79693	-1.04618	-0.97702	-0.2538	1.06928	-0.965438	-0.978629	0.272611	0.164897	0.0538967	-0.0121473	0.123226	-0.611322	0.665482	-0.978129	0.195787	1.08471	-0.0739705	-0.745959	-0.686571	0.101857	0.402484	-1.22794	0.812462	-0.160619	0.36766
AL732509.1	1.96541e-06	-5.70655	5.94602e-05	0.358279	2.48248	2.35927	1.36499	2.06343	1.97144	2.21263	2.101	1.29502	2.34066	2.3381	2.09616	1.79493	2.09583	2.09583	2.09583	2.82902	2.64496	1.45522	2.17806	2.1949	2.28731	3.02725	1.57359	2.0656	2.07527	2.41076	2.79348	2.71568	1.61644	2.64185	2.08648	2.75862	2.25931	1.86362	1.83353	1.87327	1.69898	2.4861	1.86576	1.79651	2.30799	2.29865	2.39789	1.96177	2.33933
TMCC1	1.97247e-06	-5.70499	5.95208e-05	0.428807	6.12045	6.62514	5.34482	5.71528	5.87865	5.86782	4.99577	4.47114	5.63435	6.23347	5.35772	5.78042	5.5055	5.5055	5.5055	6.22943	6.61676	5.37341	5.15003	6.49103	5.61609	6.79503	5.33406	4.77722	5.26307	6.6193	5.8609	5.93925	5.4038	7.17566	6.5074	5.79098	6.1869	5.63949	5.45454	5.77474	5.87153	6.77222	5.98862	5.19052	6.04828	5.55864	6.76201	5.4554	5.98058
LRRC37A	1.97321e-06	-5.70483	5.95208e-05	0.447971	2.73735	2.84508	2.47281	2.30519	2.37787	2.85216	1.82031	1.29502	1.40432	2.5368	1.46795	2.23819	2.37793	2.37793	2.37793	1.8281	3.20547	2.53252	2.97463	2.06969	1.65164	2.58786	2.74262	1.8033	3.22689	2.30328	2.77923	3.57624	2.87786	2.81741	1.57348	2.27224	2.50692	3.13666	2.33285	2.64711	3.5775	2.77033	3.30676	1.45017	2.62047	2.39501	2.70605	1.91403	2.63369
DNAJB9	1.98032e-06	-5.70326	5.96478e-05	-0.431651	3.00525	2.9396	3.27047	2.74881	3.94132	2.65395	3.50563	2.93799	1.96381	3.25343	3.30901	2.85083	3.65345	3.65345	3.65345	3.04214	1.73525	2.93714	3.12734	3.22283	3.51767	3.02725	3.61483	3.17292	3.33835	2.91298	2.14119	3.39826	3.43274	1.88119	2.91821	2.70607	2.3345	3.42012	2.9131	3.10437	2.89429	3.21144	2.83133	3.41625	3.61025	3.38822	2.96912	2.84639	2.51825
ICAM4	2.01748e-06	-5.69519	6.0678e-05	0.597123	1.60329	-0.410897	1.95121	2.06343	0.200914	1.19754	1.65641	1.92205	0.948865	2.3	0.9343	1.1518	2.36804	2.36804	2.36804	2.55262	1.46108	0.240058	1.19371	1.41983	1.15303	0.258256	0.377539	1.91104	-0.0366934	0.509613	1.43691	-0.085489	1.91687	1.52413	1.89062	0.989952	0.340214	0.883061	0.416097	1.38172	-0.556772	2.30144	-0.0159224	0.581875	1.39596	1.08813	1.00519	1.16806	1.98658
RBM43	2.02205e-06	-5.69421	6.07265e-05	0.61407	4.58652	4.69436	4.10675	3.99419	3.50004	5.47075	3.63537	4.10368	4.67678	4.92386	3.86691	3.20192	4.11319	4.11319	4.11319	2.42819	5.12834	4.90782	3.86539	3.10013	4.14063	3.6712	4.30615	3.62568	4.90196	3.46517	3.91106	3.97484	3.9317	3.25726	3.30864	5.64507	5.08141	4.5915	3.86412	4.04351	4.72212	2.71595	4.4179	4.58618	5.03378	3.65791	3.2762	4.43886	4.45968
TPK1	2.03035e-06	-5.69243	6.08715e-05	0.439101	4.80572	4.51154	3.72099	4.53875	3.66927	3.9825	3.4106	3.74016	5.53195	4.3923	3.82655	4.07682	4.07723	4.07723	4.07723	4.40362	5.1927	4.53545	4.15203	4.2482	4.50844	6.03984	4.0089	4.02906	4.53528	5.15187	4.79994	4.46948	3.58983	5.99365	4.33287	4.13264	5.39635	4.1941	3.98955	4.16191	3.91556	4.72855	4.40126	4.1515	4.43084	4.27375	4.75797	4.56013	4.09086
CCNA2	2.0328e-06	-5.6919	6.08715e-05	-0.600839	2.30894	1.34266	2.57149	1.30105	3.57653	1.50087	2.6371	2.22656	1.96381	1.04944	2.55722	2.64234	2.54524	2.54524	2.54524	1.69042	1.31453	4.97022	2.74838	2.94477	2.32953	1.63559	2.69944	2.71026	1.30968	0.852335	1.89907	2.86464	2.63454	1.38234	1.28515	2.5207	2.05218	2.23528	1.84875	2.05258	2.50551	2.2766	3.39345	2.01387	1.60563	1.93548	1.51634	2.09618	2.19642
DENND6A	2.03861e-06	-5.69067	6.09564e-05	0.19509	5.35026	5.13484	4.87279	5.19079	5.13961	5.22758	5.05682	4.92256	5.30888	5.36161	4.90137	4.87102	5.32431	5.32431	5.32431	5.15168	5.59053	5.35565	4.99983	4.87184	4.86006	5.19639	4.98886	4.89812	5.19408	5.80969	4.59958	5.08503	5.25467	5.18739	5.49899	5.16509	5.60623	5.27132	5.25483	4.98423	4.89802	5.37464	5.31622	5.23177	5.25067	5.48149	5.34027	5.26715	5.24582
USP18	2.05016e-06	-5.68821	6.12127e-05	1.10498	5.33758	5.08516	5.57123	-1.01691	2.78026	6.14842	4.0885	3.50012	4.76972	5.9122	3.84687	2.58792	4.82159	4.82159	4.82159	-0.222025	5.43958	5.68272	4.85422	0.785781	4.56549	4.69845	4.35566	2.49958	6.17011	2.36872	4.56261	4.60006	4.53102	0.773596	0.633482	6.34791	3.93439	5.43691	4.13008	3.84541	5.59872	0.720739	4.66094	5.27976	6.36296	4.01875	-0.996625	3.73097	5.30275
IGKJ5	2.06687e-06	-5.68469	6.16222e-05	-0.952309	-0.583807	-0.761282	-0.584418	-0.546222	1.62553	-1.03378	0.908165	-1.30196	0.808353	-1.16926	-0.144504	-0.620872	-0.207517	-0.207517	-0.207517	-1.64976	-4.34055	-2.28312	-1.03448	-0.522035	-0.12165	-2.99075	-0.2538	-0.0914801	0.270551	-2.99184	-0.0963874	0.804269	-1.21883	-2.12761	-0.76484	-2.55295	-1.00702	0.257078	-0.698412	-1.16474	-0.464237	-1.08908	-2.9316	-0.404641	-1.37267	0.0440947	-2.73926	0.301885	-1.3829
CHRNB1	2.07562e-06	-5.68285	6.17934e-05	0.441982	1.9892	1.34266	2.65102	0.766836	1.3297	2.43716	1.57528	2.17058	1.62984	2.32551	1.21006	0.924739	2.31756	2.31756	2.31756	1.30648	2.01384	1.43454	1.7017	1.49967	1.75852	1.8948	1.27342	1.48248	2.4711	1.44447	2.24855	1.49467	1.91687	1.63249	1.39486	2.11987	1.61297	1.68667	1.6546	1.14346	1.93815	1.31582	1.8495	1.57509	2.17083	0.89661	1.04083	0.487292	1.74093
NFIA	2.08028e-06	-5.68188	6.18424e-05	0.361139	5.4246	5.98785	4.63599	4.23716	4.70592	4.82004	4.87045	5.72162	5.01324	5.15127	4.93971	4.96155	4.99867	4.99867	4.99867	5.57819	5.70773	5.19741	5.36959	5.43202	5.28526	4.80092	4.79055	5.08391	5.07038	5.27362	5.38641	4.82583	5.66107	6.18819	6.00211	4.78278	4.88906	5.18004	5.1861	4.79563	4.84023	5.80851	4.79224	5.30703	5.0824	4.9669	5.70483	5.03394	5.66628
SREBF1	2.09923e-06	-5.67794	6.23155e-05	0.313255	5.66166	6.07951	5.60657	5.71354	5.56402	5.58952	5.56956	5.73857	6.18549	5.55327	5.32549	5.1099	4.76619	4.76619	4.76619	5.66346	5.37787	5.80255	5.38633	5.78956	5.04669	4.71953	4.95561	5.21282	5.20543	5.99898	6.07	4.67763	5.86622	5.19271	5.70793	5.34557	5.93845	5.36253	5.58408	5.0738	5.40379	6.01407	5.24807	5.08644	5.20895	5.74487	5.62489	5.96907	5.76201
PDIA6	2.10233e-06	-5.6773	6.23175e-05	-0.349002	5.3304	5.70649	5.8949	5.3272	6.34558	5.51452	5.44035	5.32317	4.96854	5.41605	5.69829	5.50154	5.84282	5.84282	5.84282	5.23245	4.92023	5.80053	5.36345	5.56324	5.14256	5.26969	5.77979	5.30035	5.2825	4.75495	4.75695	5.76303	5.90214	4.64625	4.97259	4.89562	5.15585	5.54235	4.95954	5.26288	5.22773	5.12273	5.05768	5.28238	5.9284	5.45442	5.45533	5.41453	5.0725
RAVER2	2.17034e-06	-5.66347	6.42407e-05	0.874506	2.22413	0.244456	1.23338	0.967696	1.35474	1.94659	1.68763	2.33238	1.58746	1.3016	1.59353	1.52058	2.13134	2.13134	2.13134	1.39778	1.52913	2.10532	1.64209	1.19845	1.67366	0.258256	1.63598	2.25278	1.24073	1.86308	1.32362	1.92615	2.09864	0.570636	2.04669	0.899231	0.930739	2.17555	1.68883	1.14346	1.65839	1.95522	1.49953	1.57509	1.49506	1.16302	1.85346	0.612214	1.82107
DNAH10OS	2.18299e-06	-5.66095	6.44842e-05	-0.333922	1.72383	0.831326	2.65102	1.85116	1.19755	2.11852	1.71819	1.70279	1.45233	1.32708	1.89618	1.6537	1.86219	1.86219	1.86219	0.91137	1.93242	1.25747	1.95129	2.60002	2.32953	1.92416	2.10164	2.0387	1.86226	1.97938	1.76084	2.02444	2.21349	1.93296	2.13788	0.899231	1.64286	2.11324	1.97893	2.25264	1.85079	1.31582	1.71233	1.62548	1.12601	1.89211	1.38384	2.45981	1.65609
RPN2	2.18484e-06	-5.66058	6.44842e-05	-0.298966	6.42524	6.6923	7.08176	6.50247	7.44943	6.52219	6.36605	6.34459	6.56296	6.55521	6.52076	6.56415	6.74239	6.74239	6.74239	6.35721	6.0685	6.914	6.34556	6.37276	5.85643	5.93017	6.58968	6.46643	6.18624	5.97641	5.73916	6.77537	6.936	5.88502	6.37777	5.91193	6.26586	6.59613	6.35394	6.43214	6.26868	6.32994	5.90944	6.36107	6.62989	6.66912	6.32681	6.61932	6.41672
CELF2	2.21903e-06	-5.65384	6.53341e-05	0.344414	9.94707	10.496	9.76146	9.81852	9.5903	9.74965	9.02371	8.41322	9.88503	9.69602	9.46023	10.002	9.65125	9.65125	9.65125	9.81637	10.4044	9.37325	9.46728	9.58596	9.51497	10.4998	9.68835	9.13578	9.3567	10.0431	9.61966	9.97512	9.12971	10.655	9.51562	10.1323	10.7287	9.41162	9.48601	9.97821	10.2345	9.72745	9.90618	9.14267	9.36793	9.78669	9.72365	9.65378	9.67012
RAD23A	2.22588e-06	-5.6525	6.53341e-05	0.60712	6.31931	5.46301	6.10482	6.12561	5.09202	5.47866	5.37593	5.55536	4.92666	7.01859	5.16481	6.54784	5.58235	5.58235	5.58235	7.91576	5.18919	6.16462	6.36642	6.54083	5.71893	5.39554	5.01698	5.97526	6.11699	5.57799	5.26636	5.04851	6.38513	6.74714	6.86046	5.61153	4.43908	5.55177	5.23759	5.15814	4.86496	6.74589	5.2833	5.12927	6.39218	5.21877	7.25704	5.47335	5.94526
ARID5A	2.22789e-06	-5.65211	6.53341e-05	0.498367	6.58905	6.88674	6.70077	7.45112	5.66005	6.3106	5.64505	5.0637	7.39918	6.03903	6.4039	6.57468	5.33069	5.33069	5.33069	6.51594	7.02541	5.72591	6.08798	6.48675	5.81988	7.79421	5.75716	5.50458	5.88249	6.68287	6.34137	6.35584	5.36705	6.83991	5.48913	6.75197	7.21343	5.69479	5.64854	6.61517	6.46457	5.98466	6.11135	5.35137	5.96516	6.44613	5.5309	5.8921	5.53284
ST8SIA6	2.22935e-06	-5.65182	6.53341e-05	-0.419736	2.05653	0.244456	3.47369	1.47602	1.97144	1.59706	2.21252	2.50074	1.13689	2.19321	2.4942	1.9922	2.10777	2.10777	2.10777	1.89231	1.73525	1.92433	1.74011	1.84358	2.357	2.30505	1.75322	3.3142	2.3617	2.51078	1.40013	1.82068	3.32007	2.13806	2.29331	2.03719	1.27411	2.25849	2.94884	2.4283	2.84992	2.14557	3.01023	2.50146	1.67491	2.27634	2.25347	1.74242	2.31186
TET2	2.22954e-06	-5.65178	6.53341e-05	0.414951	9.63127	10.1772	9.25817	10.2875	9.16993	8.99574	8.16354	7.61447	9.27647	9.31075	8.99386	9.62896	8.99085	8.99085	8.99085	9.84893	10.1139	8.54739	9.17183	9.16988	8.98304	10.771	8.71877	8.36709	8.86542	10.0857	9.55981	9.75525	8.44797	10.041	9.1725	9.67984	10.2296	8.64045	8.41944	9.62004	9.54063	9.51219	9.11492	8.1463	9.27913	9.6069	9.26507	9.41493	9.11701
ARHGAP27	2.24326e-06	-5.64912	6.56424e-05	0.324095	8.50902	9.41015	8.43578	8.88284	8.15041	8.70278	7.71128	7.09066	8.63245	8.22896	8.12925	8.71043	8.08123	8.08123	8.08123	8.5215	8.63853	7.67536	8.20623	8.40586	7.84978	9.01479	7.9081	7.76755	8.00269	8.50451	8.3582	8.44296	7.94108	8.86646	8.35303	8.88509	8.83394	7.95385	7.72966	8.58777	8.57682	8.39097	8.10352	7.50893	8.3276	8.47398	8.15173	8.5425	8.18838
RANBP10	2.26343e-06	-5.64523	6.60711e-05	0.608801	6.39167	5.87676	5.58311	5.73263	5.20647	5.54649	5.03726	4.85979	5.0449	6.76551	4.86197	7.18414	5.40027	5.40027	5.40027	7.068	5.36396	5.98695	6.77471	6.91302	6.14254	6.02128	5.32935	5.62135	6.0045	6.09879	5.78089	5.26167	6.45725	6.70495	7.24441	6.10316	5.74187	5.44072	5.05119	5.57312	5.07421	6.39701	5.80999	4.75413	6.5692	5.46802	7.03314	5.70957	6.76325
DCAKD	2.26833e-06	-5.64429	6.60711e-05	-0.264709	3.56239	3.32144	4.24131	4.14171	3.50564	3.83248	3.63137	3.47145	3.0822	3.38662	3.6295	3.82251	3.67767	3.67767	3.67767	3.35476	3.06736	4.19475	3.96199	4.0863	3.44911	2.49309	3.4682	3.7428	3.33835	3.45516	3.1331	3.63964	3.873	3.34906	3.65582	3.20929	3.98194	3.6613	3.95481	3.46838	3.48188	3.61468	3.75389	3.84624	3.28978	3.4191	3.73906	3.71713	3.98613
MYO1D	2.26935e-06	-5.6441	6.60711e-05	-0.498322	3.5972	2.6845	4.52075	3.2312	5.37809	3.30089	3.63937	3.70611	3.78175	2.8497	3.86691	4.07287	3.71716	3.71716	3.71716	3.78507	2.45976	3.36086	3.86104	4.20121	3.3704	2.72762	4.30135	4.10881	3.33835	3.10444	3.4976	4.14835	4.04903	3.19501	3.45261	2.41005	3.5954	4.16368	3.21856	3.53573	3.79904	3.85593	3.40462	3.49967	3.02379	3.44434	3.64956	3.48089	3.41852
FAM172A	2.27077e-06	-5.64383	6.60711e-05	0.327955	5.07474	5.01453	4.57613	4.91503	4.95137	4.5435	4.40255	4.26607	5.13591	4.75109	4.9326	4.83876	4.62594	4.62594	4.62594	5.23452	4.60521	4.6852	4.68733	4.46509	4.77605	5.74927	4.6967	4.23265	4.54246	5.58947	4.89554	5.11508	4.43959	4.69954	4.49688	5.17237	5.5323	4.80364	4.74452	5.11475	5.06841	4.66058	4.77512	4.73321	4.70992	5.09036	4.64092	5.00005	4.51192
AC124319.3	2.32283e-06	-5.63398	6.74901e-05	0.599493	4.85007	5.28242	4.33257	5.56653	3.93303	5.8545	3.46566	3.21201	4.49961	4.26625	3.73138	4.49869	4.13668	4.13668	4.13668	3.33179	4.98426	4.46327	3.94975	3.67374	4.18729	5.24664	4.49264	3.30294	4.58132	4.15078	4.5709	4.56511	4.8428	4.36139	3.57421	5.90028	5.17643	4.18504	4.0986	4.31352	5.50455	3.12364	4.73806	3.87777	4.43833	4.74924	2.83345	4.39896	5.10887
UBE2G1	2.32738e-06	-5.63313	6.75268e-05	-0.271487	6.2817	6.18832	6.6232	6.58309	6.81235	6.1234	6.01326	5.63637	6.67216	6.13952	6.59171	6.47699	6.41211	6.41211	6.41211	6.98271	5.85972	6.39948	6.45785	6.42418	6.25361	6.29429	6.83964	6.46706	5.67764	6.51236	6.09035	6.77125	6.22517	6.00982	6.24342	5.97437	6.57482	6.33666	6.1192	6.6699	6.16927	6.37451	5.73229	5.99963	6.0186	6.37309	6.38603	6.31146	6.1365
TRIM5	2.35732e-06	-5.62758	6.82991e-05	0.653648	6.8763	7.76369	6.68747	6.64577	5.79537	7.45116	5.76332	5.45203	6.33063	7.30889	6.06645	5.48674	6.61648	6.61648	6.61648	5.25908	7.75102	6.72577	6.31487	4.8027	6.23058	7.37181	6.30465	4.84089	7.14447	5.61666	6.61954	6.60582	6.03692	5.20153	4.94218	7.32641	7.23628	6.44623	6.06811	6.25364	7.26357	4.68909	6.55421	6.52157	7.45405	6.25395	4.70063	6.42509	6.82771
RPL21P123	2.38768e-06	-5.62202	6.90812e-05	0.492127	2.00295	1.97884	1.7249	2.41241	1.9387	1.77212	0.367978	0.271494	2.34066	1.24925	0.386479	1.77558	0.949532	0.949532	0.949532	2.05076	2.49422	1.13465	0.251351	1.09942	0.384827	1.44622	0.815218	0.638893	1.01157	2.62232	2.28935	2.08643	0.529759	2.6104	1.94934	1.7036	2.64624	1.29591	1.28114	1.6279	2.02052	1.69897	0.916732	1.11607	0.5935	2.33149	2.10985	2.12443	1.41918
TUBA1A	2.42383e-06	-5.6155	7.00284e-05	0.498913	7.82577	8.25194	7.37117	7.80602	6.93363	7.28194	6.20884	5.74217	7.17162	7.38819	7.1919	7.36815	6.95962	6.95962	6.95962	8.67826	7.89767	6.78568	6.92242	7.896	7.24075	9.35052	7.22459	6.24312	7.35384	8.42213	7.47906	8.11119	6.42398	7.9002	7.72541	7.51818	7.2827	6.90003	6.87152	8.03994	7.99654	8.46205	7.04139	6.21033	7.89704	7.24812	7.8991	7.36416	7.17273
RNF144B	2.47278e-06	-5.60681	7.13425e-05	0.617234	7.63438	9.36082	6.26821	7.95827	7.13042	6.26191	5.94708	6.59703	8.09167	7.42737	6.57354	7.17309	6.9982	6.9982	6.9982	7.82683	8.58208	6.13448	6.48637	7.52204	6.12866	8.12884	6.68867	5.66157	6.37302	7.8195	8.16516	7.82078	5.62891	8.08032	6.81036	7.67552	8.51589	6.23206	5.92648	7.49971	7.41629	6.98121	6.76993	5.37611	6.56351	7.09995	6.88415	7.02484	6.22016
AC107067.2	2.50053e-06	-5.60197	7.2042e-05	0.974093	0.259216	0.370464	-0.259559	-2.50268	-2.86392	0.964945	-0.91039	-0.159445	0.168915	0.583763	-0.227056	-1.83402	-0.87181	-0.87181	-0.87181	-2.24496	0.265191	-0.0204538	-0.910302	-1.35143	0.153701	0.162967	-0.434367	-1.82969	0.199655	-1.84472	0.099877	0.164897	-0.604294	-1.00563	-2.6004	1.73016	0.411399	0.00591187	-1.22672	0.0272092	-0.00715495	-3.4512	-0.508323	-0.703193	0.854631	0.330647	-4.34055	0.301885	-0.925145
PTTG2	2.51965e-06	-5.59866	7.2491e-05	0.480761	2.16909	2.9396	2.25256	2.16913	1.72489	2.05218	0.367978	0.470058	0.56803	2.06279	0.77375	0.737443	0.975816	0.975816	0.975816	2.60465	2.26065	1.83247	1.07852	1.17433	1.5362	2.43309	1.57359	0.319441	2.17103	2.43133	1.60795	2.08643	1.43896	2.57824	2.27046	2.45851	2.60128	1.2733	0.868386	1.87327	2.52821	1.66109	2.01904	1.59208	1.60563	1.70429	2.12654	2.11038	2.29793
GRAMD1B	2.54754e-06	-5.59388	7.31909e-05	0.719301	6.32201	7.28505	5.72768	6.37019	5.14141	6.78343	5.74489	5.18697	5.74692	5.98504	5.10701	5.30975	6.0771	6.0771	6.0771	4.92488	6.12274	6.4887	5.60111	4.81054	5.31533	6.01788	5.33759	4.85252	6.22022	4.78722	6.07146	6.05133	5.65091	5.07281	4.90928	7.23605	7.14067	5.37054	5.14817	6.11097	6.85136	4.83445	6.7629	5.31728	6.43337	5.22752	4.94593	5.91654	6.38164
KIF20A	2.55881e-06	-5.59196	7.34122e-05	-0.686183	1.06417	-0.410897	1.70019	0.595407	2.66488	0.501159	0.854157	2.09741	2.17885	-1.16926	1.21006	1.9922	1.27998	1.27998	1.27998	0.481329	-0.0288923	3.30499	1.91817	1.62957	0.330423	-0.29724	1.03953	1.09562	0.523713	-0.776423	1.36238	1.80232	0.982633	0.570636	0.482599	1.03326	0.930739	0.11168	1.48966	0.892578	0.922741	0.957927	1.39134	0.43891	-0.802644	0.806048	0.683114	0.487292	0.612487
TMEM62	2.5728e-06	-5.58959	7.36229e-05	0.484038	5.11096	5.01453	4.91636	4.2225	4.2853	5.48024	4.69721	4.30883	5.02122	5.26605	4.63248	3.9488	5.03506	5.03506	5.03506	3.63677	5.20662	5.16639	4.71652	3.72862	5.12868	4.9967	4.81772	4.15024	5.60234	4.64037	4.3998	4.70259	4.52309	3.48824	3.96777	5.58084	4.87339	5.00922	4.74858	4.64111	4.79414	4.21414	4.96825	5.08494	5.35988	4.71853	4.15141	4.80881	5.07658
DONSON	2.57332e-06	-5.58951	7.36229e-05	-0.290789	1.88169	1.18007	1.7731	2.34182	2.76166	1.68724	2.12401	1.88774	2.05992	1.35211	1.91555	2.05774	2.30724	2.30724	2.30724	1.66614	1.88126	3.10358	1.81399	2.14611	1.75852	1.02639	1.92549	2.10503	1.66585	1.76926	2.28935	2.07118	2.1324	1.80913	1.35197	1.64896	1.96022	2.10045	1.90806	2.08291	1.65839	1.60233	2.66472	1.81109	1.56971	1.93548	1.87336	1.54761	1.93349
FGD3	2.59643e-06	-5.58562	7.41805e-05	0.330208	8.94942	9.469	8.86791	9.27241	8.5936	9.2446	8.16041	7.16057	9.20054	8.81046	8.52255	9.24802	8.4514	8.4514	8.4514	8.87034	9.38403	8.28469	8.3761	8.78158	8.23867	9.52278	8.58579	7.86861	8.46433	8.8464	8.74901	8.98616	8.25411	9.43178	8.47734	9.15819	9.42182	8.55294	8.65245	9.1819	9.25708	8.67348	8.74341	8.34719	8.22307	9.06865	8.50065	8.95327	8.53892
MSR1	2.62198e-06	-5.58137	7.48066e-05	0.901569	3.49615	5.06899	2.23546	0.533417	1.40355	3.94643	3.31388	5.04825	2.15002	2.48115	1.97214	0.375647	2.71868	2.71868	2.71868	2.39902	3.66972	3.13596	0.251351	1.17433	1.5362	3.81135	0.223509	3.24529	4.96477	1.36117	2.4952	0.0451293	3.30164	2.57824	1.93489	1.67654	-0.290306	0.91263	0.495591	0.630364	2.03644	1.64177	3.22086	1.64189	5.30631	1.40848	3.85371	3.51862	3.66098
SPG11	2.67513e-06	-5.57265	7.62171e-05	0.29226	8.40517	8.83802	8.12711	8.63536	8.07849	8.7107	7.58821	7.29509	8.49128	8.42882	7.94801	7.99501	8.02413	8.02413	8.02413	7.97379	8.86552	8.15501	7.57997	7.52353	7.6288	8.47192	7.86071	7.06536	8.14156	8.45043	8.24899	8.45934	8.08218	8.41064	7.87609	8.64448	9.00839	8.11077	8.10245	8.29444	8.62485	7.94419	7.95775	7.92506	8.19589	8.52322	7.86595	8.53594	8.24622
ARHGAP26	2.6877e-06	-5.57062	7.64691e-05	0.44955	9.4153	10.0632	9.14197	9.88169	8.82942	9.11173	7.96345	6.98863	9.3883	8.97476	8.90792	9.41294	8.71739	8.71739	8.71739	9.38684	9.91351	8.40351	8.45128	8.98751	8.31945	10.1962	8.7952	7.8864	8.54385	9.62468	9.38657	9.50465	8.11632	10.1022	8.94982	9.59172	10.0975	8.52584	8.32687	9.62028	9.66509	9.34241	8.84816	8.06515	8.80125	9.30977	9.10698	9.1616	8.92638
AC092145.1	2.74036e-06	-5.56219	7.78596e-05	0.576416	5.42998	6.24803	4.28351	5.98216	4.68633	5.38071	4.4305	1.06874	5.11369	4.91338	4.34166	5.40096	5.27091	5.27091	5.27091	5.25705	5.95558	3.79729	5.00181	5.64342	5.10254	6.54635	5.02137	3.5751	4.78877	4.77117	5.33861	5.04851	3.88543	6.58061	4.96904	5.6151	6.41945	4.41679	4.85979	5.32289	5.63054	5.5403	5.72674	3.88812	4.58501	4.78919	4.5511	4.85167	4.59118
CCNB2	2.74467e-06	-5.56151	7.78744e-05	-0.660263	1.72767	-0.31076	2.45815	1.69002	3.02607	0.643123	1.96747	1.97203	1.62984	-1.16926	2.11304	2.41114	1.94435	1.94435	1.94435	1.51118	0.75648	4.18549	2.164	2.58179	1.48731	0.913827	2.04528	2.15598	0.739012	0.789996	1.84535	2.45873	1.83722	0.227856	0.521825	1.56291	1.61297	1.7205	1.67182	1.87327	1.57362	1.43284	2.7635	1.01888	-0.0218575	1.61819	0.589954	1.48364	1.76139
AC002511.1	2.76356e-06	-5.55853	7.83021e-05	0.65292	2.92868	3.44833	3.63233	3.51399	2.20965	3.35692	1.39789	0.55995	3.12726	2.36295	3.18679	2.22398	2.1196	2.1196	2.1196	3.03267	3.82669	1.9537	1.4235	2.25365	2.74796	3.25225	2.36376	0.987251	2.03511	2.00705	1.87246	3.13046	1.75292	3.12253	1.35197	3.03915	3.7198	1.90834	1.73869	3.35488	2.44714	1.82423	3.12278	0.88739	2.34033	2.91173	1.29809	3.04415	2.64475
PGRMC1	2.78806e-06	-5.5547	7.88876e-05	-0.518313	5.58035	4.80731	6.09063	6.52255	5.74418	5.58952	5.38667	6.01971	5.22844	4.74401	5.95853	6.24434	5.02408	5.02408	5.02408	6.57011	5.02803	4.75567	6.14992	6.80373	5.44421	5.24373	6.00631	6.40523	4.91585	4.67528	4.96644	6.24299	5.42609	5.14044	5.3598	4.48431	7.00916	4.97635	5.35148	5.72511	6.22592	5.50465	3.91885	4.93816	4.94717	5.18173	5.98077	6.15682	5.50733
H2BC13	2.83146e-06	-5.54799	7.99875e-05	-0.719293	2.26632	1.67125	3.01393	2.06343	3.64917	1.3978	2.30601	1.81658	2.3908	0.88762	2.80584	3.14274	2.47326	2.47326	2.47326	2.49864	0.265191	4.52081	2.84846	3.41525	2.95091	0.431807	2.38208	3.40124	1.52797	1.07781	2.16331	2.84684	2.46604	1.04857	1.74904	1.47141	2.00693	2.25849	1.11487	1.80212	1.52929	2.669	2.48688	1.55789	0.762156	1.60034	1.00519	1.60886	2.61133
H2BC3	2.83472e-06	-5.54749	7.99875e-05	-0.824745	1.29391	-1.22503	1.42654	0.329661	2.70438	0.964945	2.54635	0.42292	0.279512	-1.89452	2.19459	2.13569	1.63366	1.63366	1.63366	1.64144	-0.782763	3.3276	1.74011	2.68785	1.75852	0.726571	2.01038	2.092	-0.124941	-0.599106	0.865037	2.37427	1.38397	0.334376	0.521825	0.698642	0.265333	1.52377	0.416097	1.19991	0.485788	0.683432	1.63853	0.941431	-0.467944	1.03595	-0.733186	1.02558	1.22666
DSP	2.85206e-06	-5.54484	8.03663e-05	1.02335	2.72953	1.87636	-0.85039	1.50861	1.9387	3.55555	1.57528	2.59943	2.20711	1.9194	1.17834	0.269	0.20174	0.20174	0.20174	1.27471	3.62896	2.60834	2.53557	1.17433	2.80891	0.586704	1.97461	1.09562	3.73292	3.32931	2.84912	2.50486	1.25199	1.10984	1.14143	4.13264	1.41933	1.68667	0.416097	0.630364	1.79571	0.0827615	4.05982	2.63864	2.39268	3.05625	0.490361	-0.549365	1.22666
BBC3	2.88827e-06	-5.53936	8.11685e-05	-0.364807	3.34297	3.57153	3.46638	3.01007	3.59766	3.45645	3.07508	3.25974	4.39294	2.86717	4.0964	4.30312	3.20879	3.20879	3.20879	2.87212	2.88893	2.66269	3.53489	4.9854	3.64014	2.64187	3.48524	4.10558	2.88669	3.20342	3.98123	3.79159	2.92678	4.33918	3.8378	3.69387	3.99358	3.357	3.4407	3.70131	3.26249	4.2304	2.80626	2.79358	3.09502	3.3244	4.29483	3.62623	3.64456
IGHV4-39	2.88843e-06	-5.53934	8.11685e-05	-1.20086	2.21083	2.87728	3.21921	1.57165	3.07208	3.13454	3.59889	1.46754	3.92475	0.142039	2.22596	2.54286	1.74482	1.74482	1.74482	2.42819	-2.14142	1.6291	1.19371	2.98	0.877535	0.431807	3.36145	3.0436	2.22558	-1.84472	0.00507972	4.56783	1.84742	0.112839	1.26217	1.47141	0.722579	2.80734	0.570933	2.35562	2.20091	-4.34055	-1.26169	3.0364	-0.802644	2.18346	0.931161	2.50347	2.15064
SMIM14	2.89916e-06	-5.53773	8.13587e-05	0.301508	5.48022	5.80324	4.51012	5.54705	5.09388	5.75244	5.15082	5.31835	5.36952	5.37999	5.13414	5.13289	5.23736	5.23736	5.23736	5.2448	5.70528	4.90782	4.86077	4.89786	5.21755	5.79964	5.41858	4.49258	5.08274	5.43254	5.23276	5.47078	5.1504	5.36124	5.30042	5.94915	6.34753	5.12427	4.7199	5.42559	5.38059	5.3149	4.64218	4.79139	5.66772	5.15446	5.06754	5.37246	5.21092
NCAPG2	2.93058e-06	-5.53305	8.21283e-05	-0.474085	3.36806	2.16427	3.73323	2.59039	3.93718	2.79246	3.9114	3.79209	2.68008	2.45827	3.38045	3.46608	3.36611	3.36611	3.36611	2.90361	2.36364	5.02658	3.89548	3.49046	3.55966	2.5507	3.33818	3.62116	2.92015	2.9562	3.91106	3.25715	3.64642	2.523	3.46272	2.5207	2.53907	3.43038	2.97681	2.87223	2.91166	3.52261	3.57256	3.1555	3.23922	5.40642	3.01464	3.24401	3.43134
AC012150.1	2.97315e-06	-5.52678	8.32076e-05	0.997895	0.557084	-0.0463239	-4.34055	0.766836	-0.175582	-0.771032	-1.47532	-0.159445	-0.769094	-1.89452	-1.31633	-1.83402	-1.18462	-1.18462	-1.18462	0.172097	-0.485548	-2.28312	-2.46587	-1.09534	-1.36734	0.658332	-0.972001	-0.759719	-1.33486	-0.0505548	0.272611	-0.772943	-1.60724	1.22509	0.358086	0.187498	1.91194	-1.09096	-2.31811	-0.0365812	-0.655652	0.0827615	-0.426831	-2.68716	-0.467944	-2.0701	0.20638	-1.72288	-1.57467
IGLV7-46	3.00189e-06	-5.52261	8.38976e-05	-1.1561	2.07161	1.64656	3.157	0.468644	3.62365	6.13946	1.43516	-0.159445	2.02859	-0.688887	2.50703	2.59897	0.156497	0.156497	0.156497	2.39902	-1.0215	-0.488516	0.40269	2.3101	0.75896	2.1397	3.72299	1.91104	0.580624	-1.49508	1.15725	3.07802	4.28119	-0.0121473	0.173356	0.851638	1.91194	2.79945	2.00633	1.58615	1.57362	0.645135	-1.12687	2.01387	0.913144	1.23421	-1.73521	2.72253	1.87837
FAM83D	3.02715e-06	-5.51897	8.44888e-05	-0.471048	0.62402	-0.518506	0.697176	0.254803	1.4738	-0.548841	0.769154	1.66277	0.38223	-0.178113	0.895806	1.02646	1.07641	1.07641	1.07641	1.03029	0.553598	2.19411	1.19371	1.02042	0.717166	0.162967	0.91924	0.487991	0.580624	-0.169397	1.28379	0.426923	0.867074	0.570636	0.802286	0.0253678	0.606032	0.585515	0.495591	0.74862	1.17375	0.757105	1.06496	0.148553	-0.259691	0.414775	0.142201	-0.381105	1.13558
H4C9	3.15123e-06	-5.50152	8.78324e-05	-0.563982	3.08441	1.76603	3.53087	2.67895	3.8994	2.70881	4.56266	3.04305	3.42066	2.09281	3.66998	3.54818	3.35614	3.35614	3.35614	2.75036	1.63587	4.75567	3.49051	4.13399	3.90036	1.18031	3.16385	3.66579	2.82914	2.03419	2.45989	3.7443	3.58069	1.98295	2.96877	2.92881	3.11994	3.20397	2.40669	2.85476	2.47077	3.44672	3.23345	2.89976	2.17083	2.67638	1.98734	2.768	3.29769
GTF3C6	3.18106e-06	-5.49743	8.85438e-05	-0.286732	2.84178	2.37439	3.11087	2.78915	3.02607	2.5616	2.92598	2.86933	2.28871	2.89299	2.61761	2.62082	3.36113	3.36113	3.36113	3.07017	2.48283	3.74366	3.22537	3.30846	3.04683	2.79273	2.98363	3.58443	3.01612	2.21113	2.38657	2.99964	3.24875	2.047	2.75496	2.60922	2.89004	2.70965	2.89121	2.75467	2.6574	2.97717	2.99553	3.09122	3.3117	2.71837	2.67236	2.83789	2.76104
SLAMF7	3.22018e-06	-5.49212	8.95114e-05	-0.554631	5.78533	4.9754	6.63465	7.27587	6.77109	5.68016	5.96311	7.78639	5.21458	5.17777	6.23878	5.10409	6.38478	6.38478	6.38478	5.47364	3.72397	6.327	5.18873	5.81709	6.12667	4.85527	6.11915	6.23129	6.25669	5.77792	5.03102	5.79703	6.82748	3.91032	5.26906	5.54763	5.03144	6.32158	6.29128	5.55295	5.77872	5.47084	5.6277	5.75564	6.52005	5.52591	5.17369	5.87038	5.96192
PGM3	3.28416e-06	-5.48358	9.11664e-05	-0.307454	3.56188	3.16502	4.01954	3.64434	4.23224	3.41746	3.79439	3.56669	2.71985	3.85354	3.88667	3.46003	3.9304	3.9304	3.9304	3.46443	2.95639	3.86067	3.64019	3.34674	3.88156	2.87019	3.70491	3.86267	3.71396	3.47511	3.14426	3.75865	3.66673	2.6928	3.44752	3.30957	2.96293	4.11045	3.65496	3.47412	3.17168	3.51732	3.91103	3.91875	3.74924	3.75793	3.64956	3.63607	3.73006
SRRD	3.3555e-06	-5.47424	9.30212e-05	0.49655	4.62923	3.48362	4.39165	4.20273	3.89086	3.71947	3.95054	3.88633	3.05136	5.23442	3.911	4.7399	4.22425	4.22425	4.22425	5.4841	3.57095	4.6698	4.7117	4.68168	4.42328	4.17104	4.05244	4.64526	4.67577	3.98677	4.01202	3.63964	4.74663	4.60695	5.67678	4.00793	3.55667	4.10725	3.79509	3.88468	3.84497	4.81948	4.01677	3.9942	4.96284	4.08123	5.06104	3.91199	4.68518
CENPO	3.41185e-06	-5.46701	9.44559e-05	-0.338434	3.00728	2.64764	3.53786	2.84125	3.73749	2.65395	3.2102	3.35699	2.68008	2.74961	3.19474	3.23771	3.1349	3.1349	3.1349	3.03267	2.04517	4.23716	3.02994	3.44076	3.0636	1.92416	3.04815	3.72182	2.69381	2.45161	3.07595	3.33583	3.38102	1.84561	3.32536	2.55081	2.81326	3.06605	3.3527	2.75467	2.80415	3.1375	3.56262	2.87221	3.2045	3.01642	2.69491	3.07342	2.82073
REXO5	3.43663e-06	-5.46387	9.50138e-05	-0.392991	0.787241	-1.05335	0.0839423	0.819733	0.499213	0.730555	1.106	2.31957	1.54381	0.0834417	0.14528	0.776898	0.555473	0.555473	0.555473	1.53819	0.596521	1.00038	0.886408	1.29112	0.583988	1.18031	1.10717	1.1469	0.270551	-0.298914	2.40525	0.910907	1.61644	0.847407	0.482599	0.80242	0.930739	-0.298395	1.11487	0.857912	1.50661	1.0191	0.885168	0.88739	0.182261	0.0959823	0.683114	0.727176	1.25579
MTMR2	3.46749e-06	-5.45998	9.57206e-05	-0.296369	3.89637	3.28989	4.50657	4.35832	4.18765	4.0002	3.87118	4.14057	3.24098	3.99537	4.13823	3.83658	4.09532	4.09532	4.09532	4.23228	3.15611	4.6203	4.20105	3.92214	4.06351	2.76054	4.16252	4.30498	4.17769	3.84832	3.38916	4.05454	4.59598	3.10759	3.95707	3.19982	3.40796	4.26172	4.34117	3.74938	3.8851	3.76956	3.96487	4.3267	4.13146	3.8363	4.13501	4.1366	4.2184
SNCA	3.47151e-06	-5.45948	9.57206e-05	0.893148	8.64412	6.89986	7.31582	7.37309	6.78957	6.39331	6.9469	6.13663	5.03311	8.87343	4.89894	9.01499	7.15054	7.15054	7.15054	9.09045	7.43835	7.99407	8.60341	9.46725	8.69101	9.046	6.93074	8.59058	7.86414	7.58032	8.10393	8.02106	8.6282	9.18322	10.2213	7.4181	7.68586	6.78982	6.20817	6.36275	7.90843	9.16536	8.12648	5.05614	8.68064	7.06986	8.94758	7.08221	9.31583
TNK2	3.4961e-06	-5.45642	9.62692e-05	0.356728	7.42994	7.3059	7.54561	7.23142	7.07969	7.98717	6.83634	6.63888	7.68003	7.40249	6.88798	7.51246	7.08603	7.08603	7.08603	7.15236	7.2043	7.31246	6.89821	7.07654	6.75357	6.83519	6.72321	6.89352	7.49884	7.17726	7.17734	7.20981	7.39929	6.77045	7.08659	7.76052	7.26118	7.14276	6.92724	7.27345	7.07551	6.97206	7.11339	6.9762	7.61693	7.29049	6.89818	7.39347	7.44147
UBA52	3.54651e-06	-5.4502	9.75267e-05	0.514081	9.01232	8.36081	8.66338	8.92626	7.76611	8.97603	8.19205	8.85679	7.97222	9.35825	7.96525	8.99016	8.59397	8.59397	8.59397	9.83453	7.97188	8.36219	8.43911	9.37383	8.83657	8.9171	8.39742	9.12533	8.83924	8.37679	8.23535	8.43311	9.88463	8.98401	10.0577	8.33838	8.66467	8.18383	7.77617	8.32788	8.21474	9.25471	8.24001	7.59443	9.07693	7.87843	9.70476	7.94935	9.45801
SAP30	3.60333e-06	-5.4433	9.8841e-05	0.771042	2.95519	4.82117	1.7966	1.54047	1.1411	2.42411	2.39381	2.62048	3.6846	2.69194	1.1459	1.81402	2.80184	2.80184	2.80184	2.03188	4.23595	1.47561	1.6821	2.1949	1.67366	2.41253	1.93793	0.900274	1.01157	1.40342	2.4952	2.31076	2.00151	3.32342	1.23881	3.15151	4.73802	1.81748	1.67182	1.82024	3.01975	2.46427	1.54063	1.83983	1.69172	2.57946	2.20717	1.54761	2.03778
MTND6P11	3.60393e-06	-5.44322	9.8841e-05	0.914903	-0.673494	-0.410897	-3.24468	-0.418203	-1.16688	-2.7668	-1.6207	-0.233036	-1.00806	-2.46497	-4.34055	-1.10352	-2.68149	-2.68149	-2.68149	0.781763	0.596521	-2.9725	-1.67734	-1.35143	-0.783666	1.2745	-1.53384	-1.64392	-3.22157	0.96947	-1.12567	-1.87496	-2.72963	-0.660496	-0.587399	-1.77866	-1.4363	-4.34055	-2.31811	-0.904551	-2.43864	0.245196	-0.508323	-3.05931	-2.62922	-0.992975	-0.996625	-0.959418	-2.37677
DNTTIP1	3.64437e-06	-5.43838	9.9817e-05	0.350515	4.92791	5.38303	4.5487	4.97747	4.58945	4.5435	4.0104	3.21893	5.04098	4.68365	4.59693	4.83876	4.42598	4.42598	4.42598	4.87278	5.3794	4.16052	4.52633	5.15218	4.43299	5.29519	4.44986	3.83167	4.23643	5.32947	4.81749	4.89891	3.99041	5.29847	4.54527	4.78911	5.53031	4.25018	4.13008	4.75853	5.10851	5.02918	4.34146	4.15437	4.21233	4.73089	4.64961	4.87887	4.0623
MLEC	3.74577e-06	-5.42646	0.000102458	-0.308495	5.69168	5.80603	6.01874	5.66015	6.491	5.78599	5.66871	5.61949	4.97266	5.58925	5.87566	6.05171	6.01746	6.01746	6.01746	5.70129	4.98021	6.30224	5.81863	6.06768	5.30655	5.298	5.80123	5.75542	5.3779	5.45028	5.06667	6.0991	6.22517	5.22075	5.99429	5.30859	5.35406	5.80335	5.56001	5.67496	5.54685	5.86375	5.40376	5.38467	5.95475	5.82872	6.05454	5.69198	5.80081
AP003068.2	3.76081e-06	-5.42472	0.000102732	-0.630229	3.78394	2.74392	3.78702	5.03173	3.66927	4.73538	3.86437	4.31207	3.77233	2.8141	4.16275	4.6735	3.09948	3.09948	3.09948	4.78248	3.68969	2.70648	5.35264	4.6987	4.75555	2.91475	3.86977	5.16543	2.92015	1.52322	2.76483	4.22958	4.07964	4.49083	3.40094	2.80933	5.27038	2.83848	3.7226	4.3638	5.05675	3.73351	1.83305	2.73359	2.4232	2.08419	2.91253	4.70976	4.51493
SAT2	3.80529e-06	-5.41961	0.000103714	0.32873	1.70312	2.21554	1.04995	1.30105	0.924079	1.94659	1.90243	2.08232	2.12061	1.51617	1.49396	0.889174	1.91748	1.91748	1.91748	0.688401	1.77316	1.30382	1.53693	1.29112	1.05578	1.44622	0.731964	1.61584	1.61227	0.96947	1.20067	1.13278	1.91687	1.35729	1.57348	1.40702	0.479236	1.58014	1.08947	1.42972	1.17375	1.73588	1.12023	1.13938	1.95108	1.03595	0.968652	1.6483	1.58901
CD70	3.80684e-06	-5.41944	0.000103714	-0.581239	-0.0155231	-1.91265	-0.584418	-2.50268	0.255113	-0.548841	0.582466	1.12872	1.13689	-0.79483	0.14528	1.12147	-0.207517	-0.207517	-0.207517	-0.523337	-0.676741	0.54023	0.624229	0.425909	0.583988	-1.49355	1.12903	-0.501047	0.464465	0.789996	1.06627	0.474065	0.697016	-0.660496	-1.08014	0.108709	0.186351	1.1042	1.08947	-0.324352	0.117853	0.295516	-0.889987	0.85959	-0.325824	-0.992975	-0.0694767	-1.21848	-0.478878
IGKV2-24	3.84656e-06	-5.41493	0.000104546	-1.11937	1.6635	2.53103	-1.37255	-0.418203	3.44281	3.37738	1.41664	0.217269	0.880319	-1.16926	2.0266	-0.5218	1.45834	1.45834	1.45834	0.952108	-2.85718	0.332378	1.46995	3.55729	0.62976	1.83424	3.1744	1.5023	1.30968	-1.49508	-2.4292	2.23067	1.68629	0.384825	-1.08014	-0.366533	0.722579	0.257078	0.456392	1.89052	2.85891	0.523738	-2.23257	2.15778	-0.900036	3.35134	2.50384	-1.08314	0.934107
TSPAN5	3.84755e-06	-5.41482	0.000104546	0.859884	5.9109	3.47663	4.76967	4.44084	3.84742	3.89058	3.73586	3.86445	3.09738	6.34368	3.42167	6.14041	4.80336	4.80336	4.80336	7.4253	4.07073	5.64271	6.16323	6.27759	5.4506	4.79298	3.97309	5.52046	5.17803	5.48759	5.39344	4.26687	5.57315	6.22067	7.18189	5.71655	4.44333	4.21205	3.74311	4.29744	4.60153	6.23644	5.64429	3.31242	5.61912	4.10358	6.80669	4.269	5.74285
MYLK3	3.86716e-06	-5.41261	0.00010494	0.799209	1.36449	0.593606	-0.0776089	0.254803	-0.105608	-0.268947	1.19559	2.73104	1.54381	0.304776	0.9343	1.05883	-0.396869	-0.396869	-0.396869	1.03029	2.37601	-0.655828	0.851747	1.12483	1.18404	2.71087	1.10717	0.527222	-0.319495	0.724842	2.65984	0.606901	-0.781556	2.3811	-0.76484	0.586817	1.11262	-0.108229	0.743685	0.926429	2.21497	-1.37363	0.751515	0.512163	0.361047	0.146068	1.00519	-0.462784	0.470627
HELLS	3.91761e-06	-5.40698	0.00010607	-0.497895	3.37616	2.12904	3.37566	2.95202	4.54663	2.86188	3.71329	3.6458	3.00382	3.23336	3.3874	3.25876	3.38094	3.38094	3.38094	3.05154	1.99792	5.55442	3.46781	3.68232	3.96874	1.59966	3.55149	3.81591	3.61527	3.0655	3.28205	3.79159	3.98118	2.45379	3.6065	2.94023	2.80006	3.64817	3.7018	2.97285	2.96256	3.62946	4.07738	3.30728	2.5668	3.44934	3.07604	3.57087	3.92398
RPH3A	3.91915e-06	-5.40681	0.00010607	-1.08606	5.9163	4.39404	8.10375	4.22741	5.87216	3.20493	5.46758	3.05082	6.87624	5.01878	5.93855	7.94013	5.8676	5.8676	5.8676	5.69381	6.69291	5.15853	8.20365	6.56132	4.09649	7.80461	7.97902	3.41176	5.88814	7.45409	5.12981	7.11261	2.09007	5.32455	3.90239	6.40776	4.11584	4.95697	4.511	6.69651	4.31208	2.67851	3.9535	5.9076	3.50004	7.87704	5.25938	2.23217	5.42798
CCR10	3.94506e-06	-5.40395	0.000106631	-0.518987	0.669118	0.644387	1.08855	-0.191909	1.27829	0.772361	1.41664	1.905	0.478119	-0.590195	0.971793	1.34794	1.02699	1.02699	1.02699	0.991727	0.718122	-0.655828	1.22112	1.07357	0.215045	-1.21229	1.23362	1.22055	0.523713	0.345927	1.87246	1.16187	1.36989	0.227856	-0.0385499	-0.751289	0.722579	1.17911	0.71075	0.455912	1.23023	-0.236686	0.204697	1.31341	-0.544624	0.414775	0.326758	0.571763	1.16658
PIP4P1	3.96751e-06	-5.40148	0.000107097	0.175992	4.2285	4.53528	4.1666	4.50684	4.14522	4.30441	4.12031	3.77342	4.67678	3.93451	4.29065	3.97872	4.02154	4.02154	4.02154	4.06128	3.94351	3.98321	3.83022	4.34053	3.81872	3.72223	4.10302	3.99098	4.00653	4.11308	3.76683	4.13741	4.17586	4.11471	4.38167	4.24281	4.5178	4.0452	4.2059	4.09651	3.97461	4.19439	3.79693	4.02894	4.12219	3.68358	4.04135	4.643	3.95095
NAP1L1	3.97813e-06	-5.40032	0.000107197	-0.345773	6.76036	5.93274	6.95953	7.32644	6.98113	6.72008	6.8502	6.76296	5.70046	6.80684	6.78182	6.77186	6.84086	6.84086	6.84086	7.44282	6.00221	7.23945	6.93954	7.37432	6.78994	5.94277	6.72725	7.23749	6.75783	6.26699	5.95425	7.05273	7.07405	6.01383	7.12928	6.00732	7.32307	6.77481	6.97222	6.73224	6.77393	6.90476	6.80567	7.05146	6.86759	6.58764	7.21134	7.07273	6.96301
GP1BA	3.98165e-06	-5.39994	0.000107197	-0.692856	4.59936	3.83466	5.38414	5.8722	5.13058	5.35514	4.24096	4.65575	3.73399	2.93503	5.3399	5.35608	4.21876	4.21876	4.21876	5.07075	4.62348	3.45113	5.39539	5.98687	4.27273	4.00237	4.93093	5.56237	3.37903	3.45516	4.37158	5.16442	5.04688	4.7437	4.13205	3.45998	5.43316	3.17376	4.46236	5.73828	5.27548	4.04796	1.8495	4.18549	3.0566	3.94639	4.6611	5.06524	4.82778
DCAF11	3.99837e-06	-5.39812	0.000107404	0.275316	5.92497	6.24289	5.86325	6.38453	5.71668	6.1234	5.39023	5.27587	5.76604	6.24772	5.74099	5.94966	5.47358	5.47358	5.47358	6.06969	5.7535	5.75851	5.64225	5.82098	5.43779	6.06477	5.57805	5.23224	5.84524	5.74338	5.48849	5.84825	5.9306	5.67302	5.56151	5.93352	6.51345	5.6428	5.4743	5.85603	5.67446	5.56231	5.41899	5.41124	5.72397	5.61863	5.34562	5.99033	5.68781
NAIP	3.99982e-06	-5.39796	0.000107404	0.649668	7.13497	7.62715	6.73082	6.91098	7.00308	6.21814	6.42281	4.40899	7.05402	6.33272	6.51283	6.67663	6.15105	6.15105	6.15105	6.57582	7.79372	6.58156	6.05598	6.02953	5.61751	8.42263	6.12256	4.66298	6.42542	7.67013	7.02411	7.25775	6.04967	6.67865	5.21474	7.05353	7.5725	6.55278	6.47718	7.65322	6.17197	5.59658	6.01711	5.43851	6.07735	7.11849	4.90783	7.07137	6.33378
RUBCN	4.03084e-06	-5.3946	0.000108096	0.526722	7.68866	8.32088	7.80518	7.87871	7.04598	8.54572	6.91428	6.37432	7.53009	8.03677	7.03968	7.29488	7.224	7.224	7.224	6.42932	8.08147	7.43984	6.94726	6.17036	7.02112	7.30991	7.22109	6.33857	7.80865	6.65253	7.14505	7.43537	7.1973	6.74292	6.4418	8.42197	8.28869	7.36925	7.1707	7.23387	8.03371	6.34942	7.34565	7.34725	7.86196	7.4319	6.11952	7.63223	7.40578
KDELR2	4.10341e-06	-5.38686	0.000109899	-0.241665	4.98024	5.02415	5.23082	4.97164	5.61024	4.84229	4.79362	4.66084	4.74101	5.19344	5.17288	5.29624	5.30888	5.30888	5.30888	5.38901	4.42643	5.09571	5.05229	5.07771	4.83586	4.86287	5.08286	5.05232	4.83629	4.77117	4.35726	5.35749	5.13278	4.56927	5.18756	4.4804	4.66343	5.11794	4.74044	5.06433	4.75858	5.37756	4.56708	4.84731	5.41407	4.99451	5.24226	5.09051	5.02041
B4GALT4	4.13002e-06	-5.38405	0.00011044	0.475977	5.09339	6.11707	4.407	5.36328	4.67146	4.65385	4.5877	4.44483	5.30234	4.85546	4.32727	4.66827	5.00984	5.00984	5.00984	4.02355	5.18393	4.6317	3.93741	4.4324	4.29065	5.20239	4.58845	4.26202	4.6394	4.47686	4.76421	4.89458	4.27365	4.59092	3.96065	5.44112	6.14444	4.69722	4.75667	4.99024	4.93672	3.96877	5.08225	4.86838	4.09401	4.82037	3.88836	4.26266	4.49979
GMPPB	4.13437e-06	-5.38359	0.00011044	-0.304462	2.89929	2.80099	3.20171	2.98713	3.97401	2.96463	3.30384	2.87809	3.29464	2.49245	3.15454	3.15027	2.52758	2.52758	2.52758	3.06089	2.19234	3.07046	2.94205	3.69509	3.13676	2.23649	3.33818	3.4274	2.61427	2.80679	2.54659	3.13046	3.34188	2.30455	2.68757	2.53583	2.53907	3.39939	3.01778	2.75467	2.73752	3.1783	2.72836	3.01766	2.96277	3.00967	2.97834	2.82073	2.98628
SPATS2L	4.14147e-06	-5.38285	0.000110486	0.974341	6.75888	7.39664	6.59331	4.90283	4.94726	7.34217	5.49762	4.9415	6.45663	7.2786	5.94799	4.5192	6.48826	6.48826	6.48826	2.36924	7.32367	6.55187	6.42948	3.19312	6.19487	6.71855	6.14553	3.85883	7.35944	3.10444	6.43753	6.17596	5.68544	3.47083	2.75496	7.60775	7.02201	6.36568	5.67119	6.34408	7.29328	2.47523	6.32271	6.44647	7.70392	5.97619	2.61441	6.16364	6.70571
SH3TC1	4.14863e-06	-5.3821	0.000110533	0.349728	5.35677	6.38778	4.93236	4.75788	4.70835	5.40583	5.40439	5.62731	5.2625	5.43229	4.68704	4.83409	5.60884	5.60884	5.60884	5.08226	5.56104	5.00219	4.60908	5.22886	5.34651	5.22025	3.77244	5.44308	5.42528	4.81488	4.59551	4.79599	5.50954	5.33742	5.63266	4.37493	3.86635	5.04304	5.16954	4.75853	4.81044	5.48446	4.68634	5.0392	6.30473	4.97559	5.41006	4.96923	5.59113
TMED2	4.19775e-06	-5.37698	0.000111697	-0.275737	6.34923	6.38405	5.9575	6.20231	6.91271	6.35771	6.48577	6.03155	6.24122	6.27988	6.5659	6.4725	6.7876	6.7876	6.7876	6.56437	5.85531	6.51971	6.46503	6.67046	6.41426	6.70276	6.63716	6.52393	6.22804	6.34629	5.81098	6.85433	6.60921	5.94929	6.27748	6.38704	6.68216	6.32914	5.95224	6.57171	6.24317	6.48299	5.97088	6.09883	6.54049	6.4813	6.4644	6.26702	6.11679
AIM2	4.21913e-06	-5.37478	0.000112121	0.664673	5.98704	6.85744	5.88397	7.10925	6.08537	6.09999	4.99577	3.97479	5.45449	5.3178	5.13826	4.88011	5.51561	5.51561	5.51561	5.6309	5.80129	5.02485	4.78472	4.9216	4.99297	6.67928	5.84563	3.24529	6.05558	4.83817	6.133	5.84489	4.86054	4.35508	2.9545	7.34694	7.30273	5.37851	4.5014	6.03445	6.37817	3.68715	5.28633	4.94809	5.74928	5.82968	2.54164	5.53777	4.98606
PCNA	4.29356e-06	-5.36718	0.000113899	-0.400382	4.12728	3.81816	4.79323	3.81037	4.96972	3.70335	4.80967	4.52793	3.45642	3.96729	4.35236	4.09254	4.63627	4.63627	4.63627	3.84578	2.97278	6.12886	4.44728	4.66446	4.21384	2.91475	4.27708	4.80143	4.35127	3.34022	3.77403	4.21231	4.76019	3.26402	3.64253	3.94128	3.67711	4.29578	4.2438	4.02018	3.86295	4.04429	4.95311	3.9878	3.96166	3.82481	3.60263	3.73097	4.34915
AL391280.2	4.29712e-06	-5.36682	0.000113899	0.541728	3.52271	4.46991	2.6118	4.18267	2.57185	2.70881	2.22321	1.03778	3.65413	2.94329	2.80584	3.75496	2.69514	2.69514	2.69514	3.88313	4.07832	2.2425	2.54645	3.29173	2.93277	3.87286	2.51253	2.0387	2.03511	3.35106	3.43534	3.31656	2.09864	4.77478	2.65265	3.91837	4.78569	2.44205	1.96503	3.40376	3.51067	2.75243	3.21453	1.72127	1.96497	3.28023	3.08461	3.03674	3.04586
AC105052.5	4.3185e-06	-5.36467	0.000114213	-0.703615	1.82823	0.644387	1.7492	1.69002	2.8871	2.00035	1.17371	-0.479428	2.50902	1.22234	2.87673	1.67474	1.07641	1.07641	1.07641	3.06089	0.793845	-0.845121	3.45632	1.48012	1.62928	2.30505	2.51253	1.56019	0.739012	1.22643	3.18808	2.89093	-0.174693	2.15269	2.13788	2.13982	2.98644	2.04812	1.6546	2.80102	3.42857	1.07779	0.885168	1.78177	-0.625609	2.94748	1.61421	2.6369	3.11106
SPATA6	4.3201e-06	-5.36451	0.000114213	0.546172	3.63612	3.4975	1.7249	2.84125	3.15994	2.87153	2.77429	2.34508	4.39294	2.9015	2.60573	3.07313	3.26316	3.26316	3.26316	3.27672	3.67474	2.6448	2.19198	3.21102	2.71648	2.71087	2.2184	2.91639	2.15238	3.17931	3.26169	3.94587	2.29027	5.04367	3.22791	3.00693	4.66343	2.42163	2.52508	2.84594	2.70799	4.26554	3.07461	1.94939	3.06952	2.96851	4.49117	2.9447	2.94217
DEPDC1	4.34204e-06	-5.36231	0.000114646	-0.689702	0.758748	-2.24098	-0.467813	0.533417	1.95516	0.450554	1.9547	2.35767	-0.225162	-0.688887	1.00834	1.26712	0.656425	0.656425	0.656425	0.481329	-0.398683	2.35682	0.779822	1.51896	0.62976	-1.84325	0.868166	1.37905	0.580624	-0.441216	0.631119	1.95966	1.05483	0.112839	0.268676	1.15589	0.479236	0.621773	0.807382	0.0882981	0.778698	0.565349	0.716073	0.831245	-1.00448	0.330647	0.00458762	-0.230436	0.741638
AARS1	4.36697e-06	-5.35982	0.000115156	-0.376205	4.49798	4.10323	5.68108	4.47422	5.65376	4.86903	4.63651	5.00289	4.41127	4.76281	4.66432	4.85036	4.5817	4.5817	4.5817	3.9848	3.88412	5.35977	4.33882	4.33238	4.00826	2.8397	4.76111	4.56034	4.90475	3.8252	4.21096	4.69016	5.32296	3.42937	4.46453	3.99155	3.92834	5.36654	4.96827	4.2581	4.38541	4.16085	4.44521	4.90794	4.74659	4.93164	4.09319	4.70743	4.36595
VAV3-AS1	4.45789e-06	-5.35087	0.000117402	0.549393	-0.0054891	-0.518506	-1.37255	-0.686718	-0.326616	0.166893	-1.6207	-1.65963	0.168915	-1.03337	-0.507509	-2.09384	-0.465944	-0.465944	-0.465944	-0.639594	-1.15753	-1.06306	-0.910302	-1.09534	-0.281924	0.854068	-0.499953	-0.501047	0.926314	-1.49508	0.498206	-0.568039	-1.40001	-0.766624	0.482599	0.108709	0.102795	-0.598594	-0.312556	-1.89036	-0.00715495	-0.310035	-0.426831	-1.31333	-1.37267	-1.50876	0.00458762	-0.549365	-0.799986
RPS12	4.47229e-06	-5.34947	0.000117631	0.436972	5.17156	4.28224	5.01233	4.40234	4.42187	5.14246	5.02204	5.06753	3.64383	5.57204	4.05333	4.82471	4.99867	4.99867	4.99867	5.72058	3.93517	4.96842	4.65	5.36565	4.95752	4.54155	4.34169	5.23373	4.9378	4.1067	4.02416	4.10783	5.80866	4.60429	6.14479	4.67753	3.84079	4.37757	4.55341	4.15479	3.9538	5.5494	4.80916	4.58406	5.10611	3.8401	5.29671	4.28473	5.34063
INPP5D	4.49587e-06	-5.34719	0.00011807	0.303227	8.87165	9.31478	9.26213	8.7501	8.69251	9.13345	8.17598	7.50273	9.04826	8.92453	8.45982	8.90814	8.42287	8.42287	8.42287	8.64816	9.13952	8.56296	8.02512	8.37989	7.70862	8.60108	8.20132	7.83212	8.4381	8.75273	8.69854	8.83339	8.54888	8.84382	8.85509	9.17641	9.24707	8.54027	8.6313	9.03726	9.07355	8.45619	8.50482	8.24731	8.60112	8.83647	8.58925	8.82133	8.47842
SLC22A17	4.5005e-06	-5.34674	0.00011807	-0.487213	1.15943	-1.64537	1.64946	2.41241	1.72489	0.890967	1.99269	2.74068	1.45233	0.817443	1.17834	1.39941	1.1475	1.1475	1.1475	1.03029	0.934317	1.10878	1.86702	1.91812	0.674125	0.431807	1.03953	1.77098	0.125093	0.58498	1.67106	0.72853	1.3268	0.810973	0.703391	0.945305	1.2354	1.70368	1.60169	1.17196	1.02206	0.523738	1.32231	1.67417	-0.325824	1.27979	0.541017	1.50528	1.13558
TMEM175	4.62905e-06	-5.33451	0.000121288	0.185383	5.22949	5.702	4.81929	5.60282	4.94314	5.65384	5.22052	4.73025	5.59479	5.06304	5.19485	5.46426	4.79785	4.79785	4.79785	4.98255	4.95363	4.932	4.83882	5.03481	4.95077	4.84379	4.87058	4.99925	5.28035	5.12055	4.95063	4.92883	5.36794	5.67429	4.99017	5.22468	5.4353	5.24831	5.07888	5.10555	4.91965	5.1052	5.09438	4.91471	5.0038	5.22024	5.2288	5.4016	5.32353
AP001011.1	4.63927e-06	-5.33355	0.000121401	0.467128	3.62683	3.88831	3.18399	4.23229	2.87849	3.84722	2.24436	1.81658	3.25458	3.55242	2.66416	3.31345	3.09948	3.09948	3.09948	2.76186	4.08588	3.25868	2.54645	2.99385	3.16812	3.81135	2.88431	2.40796	3.26211	3.27344	2.82157	3.80086	2.6809	4.29699	2.90344	4.21487	4.5654	3.04617	2.76053	3.41573	3.45251	2.669	3.25213	2.73359	3.14471	3.5735	3.23064	3.48089	3.71965
CASP2	4.66126e-06	-5.3315	0.000121821	0.307541	6.93685	7.28855	7.10312	7.16013	6.70326	6.32208	6.13786	5.90647	6.86187	6.72714	6.58341	7.02171	6.33108	6.33108	6.33108	7.06742	7.11625	7.00667	6.77297	6.44071	6.46249	7.08225	6.43101	6.48087	6.45331	7.25719	6.60648	6.75165	6.54994	6.84611	6.80042	6.40776	7.14067	6.42843	6.65866	6.89549	6.26107	6.86782	6.57599	6.26301	6.5341	6.9388	6.78321	6.85615	6.57676
BATF3	4.67989e-06	-5.32976	0.000122153	0.624472	0.784952	1.21408	-0.165717	0.00365547	-0.326616	0.102796	-0.24753	1.51326	0.049131	0.781031	0.329854	-0.259848	0.949532	0.949532	0.949532	0.688401	0.638204	1.30382	-0.412175	0.297763	0.674125	0.658332	-0.716755	0.602621	0.580624	0.345927	0.810016	-0.38865	-0.216577	-0.0121473	0.92441	1.85609	-0.832372	-0.232181	0.331966	-0.585479	-0.00715495	0.605793	0.604204	-0.87937	2.38236	-0.888441	-0.0694767	-1.08314	0.860171
TOP2A	4.72668e-06	-5.32544	0.000123217	-0.681679	3.21499	2.14676	3.43677	2.72127	4.67146	2.87153	3.2102	3.71102	3.01984	1.7971	3.21051	3.75496	3.30522	3.30522	3.30522	3.15113	1.73525	6.09384	2.83964	3.75732	2.70584	0.586704	3.11539	3.07703	2.11434	1.97938	3.34146	4.00324	3.96721	2.33052	2.8272	3.09131	3.13053	2.39044	3.35803	3.29134	3.32217	3.07405	3.93435	2.537	1.78867	2.85263	2.52915	3.09499	3.34589
DEPDC1B	4.73288e-06	-5.32487	0.000123223	-0.603597	1.15166	-0.899936	0.793781	-1.72004	2.32817	0.450554	1.94181	2.06707	1.45233	-0.497823	1.73107	1.39941	1.30092	1.30092	1.30092	1.27471	0.463719	3.388	1.44691	1.87386	1.5362	0.0609361	1.33113	1.68686	0.270551	0.256548	1.87246	1.7649	1.75292	0.655276	0.981802	0.751464	1.31181	0.389154	0.570933	0.785978	1.36245	1.24075	1.6759	0.831245	0.0838085	0.241307	0.812462	-0.0303692	1.13558
ZFYVE26	4.77293e-06	-5.32121	0.000124108	0.357185	7.06866	7.87286	7.02132	7.17163	6.61081	7.64541	6.42802	6.37586	6.40876	7.44711	6.66793	6.1924	6.9322	6.9322	6.9322	6.08121	7.36421	6.98638	6.60103	6.14188	6.37364	6.80591	6.64951	6.15898	7.17655	6.49047	6.71623	6.88354	7.26995	6.48917	6.42767	7.44891	7.5411	6.96938	6.67316	6.86581	7.32726	6.54475	6.52826	6.75073	7.53866	6.9101	6.43289	7.14344	6.99521
SHFL	4.84976e-06	-5.31428	0.000125947	0.531259	6.46293	6.88674	6.72547	5.90623	5.4098	7.27832	5.95271	5.38443	6.44777	6.53758	6.00335	5.42755	6.43004	6.43004	6.43004	4.64637	6.59112	6.57921	6.23643	5.0971	6.20151	6.52256	5.89431	5.31022	6.90784	5.53349	5.99027	6.11313	6.26709	5.16049	4.99017	7.53287	6.49411	6.41558	6.03938	6.2503	6.43859	5.06043	6.25332	6.30999	7.01221	5.96664	4.62634	5.90641	6.59182
HSH2D	4.90689e-06	-5.30919	0.000127269	0.546799	8.2355	8.6315	8.38338	6.99243	7.40966	8.92264	7.38569	6.00778	8.17137	8.26071	7.69971	7.22036	7.96857	7.96857	7.96857	6.441	8.69486	7.77922	7.7354	7.16605	7.71957	8.54961	7.83289	6.99583	8.35566	7.47777	8.10714	8.05319	7.34498	7.66625	7.44107	8.98187	8.20976	7.94269	7.61586	7.78937	8.49401	7.57906	8.35085	7.70034	8.55894	7.6117	7.27959	7.74652	8.34291
GPR155	5.02808e-06	-5.2986	0.000130248	0.462735	6.99885	7.13388	6.24169	7.70726	5.97767	6.51297	6.19804	5.53611	6.48431	6.62684	6.68496	6.28425	6.22824	6.22824	6.22824	6.30902	7.28524	6.85735	6.58727	6.48368	6.47821	8.08402	6.11025	5.31022	6.86337	7.55302	6.20541	7.07201	5.80801	7.01278	6.49575	7.27378	7.29334	6.58871	6.46612	6.93344	6.33295	6.7351	6.88312	6.45753	7.46295	7.10074	6.52227	6.61435	6.84099
IGLV3-27	5.05249e-06	-5.29649	0.000130716	-1.59981	1.3453	-0.899936	0.361182	-1.21548	1.45076	-0.548841	-1.22226	-0.89123	1.0769	-2.86564	1.66394	2.22398	-1.30603	-1.30603	-1.30603	-0.523337	-2.85718	-2.28312	0.0211789	1.61171	-0.462253	-1.84325	4.16517	1.09562	-0.965438	-1.84472	0.631119	-1.65612	0.945132	0.171493	-1.33657	-1.27753	0.544027	0.11168	-1.22672	-0.246852	-1.0009	1.0191	-1.41043	3.26021	0.729965	1.25718	-0.317643	1.8813	-0.216391
TREML1	5.08465e-06	-5.29374	0.000131382	-0.775222	5.23914	2.64764	6.57218	7.21608	5.03313	4.6788	4.58148	5.34388	4.00743	3.86228	5.09006	6.1423	4.17972	4.17972	4.17972	6.49627	4.74769	3.11662	6.09633	6.47012	5.15631	4.65534	5.30915	6.86366	3.9099	3.86354	4.23204	5.61446	4.77228	5.30667	4.45443	4.09736	6.69559	3.44057	4.72403	5.55566	5.1603	4.92514	2.88018	3.90862	3.25627	3.98818	5.51989	5.98552	5.26564
WDR45P1	5.18288e-06	-5.28543	0.000133752	0.773378	0.765127	1.10953	-1.59917	1.97292	0.543442	0.398109	0.514452	-0.310584	1.58746	0.355183	-0.227056	-0.9669	0.245608	0.245608	0.245608	0.0270995	0.509359	-2.28312	-0.795968	-0.173495	-1.04618	0.511333	0.643609	-0.0914801	0.199655	-0.776423	-0.205534	-0.229121	0.0887066	0.917625	0.358086	2.70607	1.15472	-0.108229	-1.10445	-0.904551	0.232888	-1.08908	-1.76372	1.11607	0.0319427	0.532428	-0.317643	0.612214	-0.925145
RGCC	5.22247e-06	-5.28212	0.000134605	0.598834	3.97037	2.54446	2.71409	2.28652	3.23602	3.00025	3.47911	3.31242	2.17885	4.3618	2.53234	3.66319	3.21432	3.21432	3.21432	5.09596	2.40044	3.90268	4.91003	4.37798	4.29775	2.91475	3.25115	4.24741	4.3098	3.7778	3.07595	3.25715	4.10324	3.5777	4.02349	3.41975	2.99805	3.26829	3.18897	2.66727	2.89429	4.01831	3.34786	3.01135	3.32792	2.93329	4.22296	2.9447	3.80094
ERG	5.28531e-06	-5.27693	0.000136054	-0.793644	1.82763	0.644387	0.839761	0.468644	1.40355	1.03531	2.75231	2.35767	1.9303	-0.0414162	0.386479	2.436	1.54866	1.54866	1.54866	1.4556	1.46108	2.57093	2.64083	1.8282	1.58349	0.586704	1.52495	3.48333	0.402678	1.12907	2.24855	2.84684	0.846881	1.94982	2.83501	1.90354	1.91194	1.34011	1.61954	2.11262	0.888056	1.62219	0.303523	0.43891	0.48195	0.455068	0.812462	-0.230436	2.13504
NECAB3	5.31409e-06	-5.27457	0.000136623	-0.32167	2.5584	1.97884	2.21816	3.78399	2.72373	2.3432	2.59656	3.53379	1.54381	2.60087	2.40108	3.15777	2.61379	2.61379	2.61379	2.57887	2.42446	2.79025	3.19803	3.49046	2.41043	1.80297	2.58549	3.52753	2.82914	1.9224	2.76483	2.60356	3.13262	3.20206	2.66146	2.11987	2.81326	2.23528	2.33285	2.30505	2.18671	2.45323	2.64601	2.63044	2.64657	1.61819	2.93164	2.71326	2.9688
AC093849.3	5.33447e-06	-5.27291	0.000136821	0.679154	0.422652	1.95892	-0.165717	-0.842386	-0.326616	-0.0346308	-1.7824	-0.479428	0.948865	0.355183	-1.50947	-1.25444	0.484021	0.484021	0.484021	-0.415754	1.59412	-0.488516	-1.17037	-0.0546725	-0.561641	0.431807	-0.2538	-1.64392	-0.544436	0.345927	-0.452239	-0.475558	-0.497168	1.3318	-0.356465	0.0253678	0.411399	-0.978129	-0.612542	-0.406253	0.531452	-0.468967	-0.508323	-0.788594	-0.0218575	-0.790973	0.968652	-0.641476	-0.478878
AC144652.1	5.33508e-06	-5.27286	0.000136821	-0.460529	0.883204	1.40289	1.16278	0.329661	0.783634	1.16652	1.45343	1.64234	1.54381	-0.590195	1.07876	1.3215	1.25872	1.25872	1.25872	0.639352	0.553598	0.54023	1.95129	1.37819	0.877535	0.162967	0.612913	1.96918	0.688124	-0.441216	1.43691	0.876229	1.05483	1.52413	0.864639	-0.366533	0.186351	0.883061	0.743685	0.670869	1.43633	1.38716	-1.00357	0.476002	0.0838085	0.373324	0.383379	0.932802	1.25579
CYTH4	5.46235e-06	-5.26262	0.00013991	0.384471	8.96742	9.61021	8.93762	9.9226	8.7751	8.61952	7.92263	6.66254	9.07797	8.40434	9.0229	9.06553	8.20079	8.20079	8.20079	9.48695	9.00908	7.83428	8.42702	8.88868	8.29635	9.70163	8.39164	7.93439	8.42432	9.38115	8.71221	9.19072	7.90354	9.23312	8.51913	8.94602	9.46599	8.39119	7.94719	9.24226	9.13793	8.7883	8.39372	7.78545	8.41102	9.04574	8.46461	9.18368	8.27562
VSIR	5.59419e-06	-5.25226	0.000143108	0.458188	10.5346	11.3669	10.3758	10.6255	9.95848	10.3355	9.41889	8.70759	11.1621	10.2294	10.0312	10.7721	9.99234	9.99234	9.99234	10.6048	11.1592	9.30484	10.0138	10.2075	9.38535	11.1123	9.9843	9.35936	9.56627	10.5067	10.3857	10.484	9.2144	11.3178	9.72253	10.7161	11.4246	9.47717	9.5981	10.6991	10.6205	10.0682	10.2412	9.35215	9.82797	10.3589	10.0183	10.3081	9.82451
PRKAR1B	5.62529e-06	-5.24985	0.000143725	-0.460318	3.11461	1.74291	3.60597	4.11021	3.38322	2.772	3.4338	3.57749	2.65977	2.61128	3.27191	4.1273	2.5097	2.5097	2.5097	3.39963	2.48283	2.88475	3.90397	4.5566	2.94187	2.16452	3.26109	3.74696	2.29525	2.32543	3.18808	3.78693	2.94113	3.10759	2.65265	2.27224	4.46858	2.7347	3.44571	2.96473	2.78542	2.45323	2.308	3.01766	1.93704	3.0431	2.71711	3.63607	3.14259
NME1	5.68575e-06	-5.24521	0.000145089	-0.497604	0.88497	0.693441	1.16278	1.05853	1.49648	0.92843	2.31603	1.72239	1.40432	0.0223631	1.5195	1.69548	1.25872	1.25872	1.25872	1.20899	0.265191	1.87913	1.4235	1.66463	0.9871	-0.0488636	1.23362	1.1469	0.788166	-0.599106	1.20067	0.876229	0.867074	-0.561643	0.482599	1.2689	0.0140993	0.621773	0.677046	0.0882981	0.38988	0.894043	0.440122	0.88739	0.0838085	0.709419	0.541017	0.727176	0.741638
SLC12A3	5.72876e-06	-5.24194	0.000146005	0.730963	0.851358	-2.24098	0.538938	-2.50268	-0.249123	0.0357182	0.769154	2.5564	0.948865	1.83311	0.686237	0.737443	0.20174	0.20174	0.20174	0.365464	1.28858	-0.0204538	0.704122	0.505424	0.75896	-0.597457	0.893929	1.01512	1.46889	-0.978629	2.36764	0.27548	0.579558	0.695804	-1.64865	-0.0630846	-0.832372	-0.168874	0.570933	-0.0365812	0.888056	-1.72843	-1.00357	0.967712	1.35433	-0.888441	-0.510505	-0.462784	-0.57818
CEP164	5.78847e-06	-5.23744	0.000147344	0.211107	4.87422	5.02894	4.98702	4.79468	4.83608	5.38071	4.50249	4.6065	4.87915	4.91338	4.47167	4.44153	4.56881	4.56881	4.56881	4.16456	4.77831	5.20353	4.48452	4.39635	4.31186	4.47864	4.337	4.20872	5.095	4.53503	4.81749	4.88807	5.13487	4.95879	5.02472	5.02729	4.87024	4.85404	4.70325	4.47377	4.59616	5.11224	4.74247	4.87881	5.19869	4.57964	4.59071	4.62087	4.91709
CHST7	5.80906e-06	-5.23589	0.000147576	0.559457	3.04231	2.78976	3.0437	1.99609	3.16702	2.01784	2.0297	2.06707	1.62984	3.03891	2.51974	2.19515	2.63043	2.63043	2.63043	3.15985	2.6347	2.79837	2.07665	3.37348	2.12099	2.53175	1.91294	3.10971	2.81735	2.4716	3.04053	3.39826	2.83749	3.11508	3.8143	1.67654	2.81326	2.79151	1.92252	2.2257	2.26989	3.94532	2.72836	1.16231	4.26944	1.13849	3.43195	2.44868	2.54209
IRF9	5.81194e-06	-5.23568	0.000147576	0.376693	4.89544	5.56374	4.42596	5.13709	4.58152	5.19144	4.45792	3.6458	4.6513	4.48859	4.53252	4.85498	4.52498	4.52498	4.52498	4.0043	5.12284	4.15421	4.42682	4.41449	4.53274	5.41377	4.37637	3.67018	4.63605	4.83817	4.44113	4.93305	4.79354	5.21728	3.80638	5.45909	5.49797	4.40123	4.38879	4.93727	4.94518	4.04429	4.9378	4.06894	4.4873	4.91006	3.38419	4.84744	4.86369
RBPMS2	5.88191e-06	-5.23048	0.000149168	-0.948575	2.11013	-1.22503	5.29618	3.66617	1.22497	1.37083	0.54886	1.60058	1.49879	0.817443	3.90132	1.85146	0.156497	0.156497	0.156497	2.93444	1.1223	-0.655828	1.3755	3.36817	2.08858	1.07955	0.703109	2.42883	0.464465	0.43009	2.4952	2.99964	0.122696	0.847407	1.11602	-0.258136	3.16183	-0.0500299	2.17278	1.05441	1.69898	1.49876	-0.594696	0.0535989	0.0319427	0.455068	1.7279	0.443126	1.4447
PPA1	5.90817e-06	-5.22855	0.000149649	-0.420265	3.70104	3.26577	4.10675	3.48153	4.47708	3.82256	4.42124	5.08656	3.22724	3.59499	3.47487	3.5252	4.33246	4.33246	4.33246	3.42156	2.88893	5.08082	4.28463	4.07005	3.99521	3.30899	3.87625	3.70481	4.00133	2.74241	3.24104	3.73949	4.30729	2.25116	3.05151	3.22805	3.14104	3.61708	3.30936	3.84098	3.89387	3.24383	3.46458	3.78475	3.59246	3.89606	3.53551	3.51329	3.78104
SERPINB9P1	5.94547e-06	-5.22581	0.000150409	0.601253	4.70312	4.58162	4.30825	5.34083	5.20647	5.08763	3.81574	3.95835	4.68685	4.77443	3.3874	3.23771	3.76693	3.76693	3.76693	4.01396	4.90963	4.72406	4.52082	2.4473	4.92576	3.69694	4.20687	3.52753	5.61602	3.43493	4.5709	4.79367	4.47126	2.45379	3.86475	4.17676	4.7276	4.01825	4.25812	3.86736	4.21046	3.3666	4.67023	4.83843	4.92779	3.70462	3.10158	4.41905	4.64996
MLKL	6.0142e-06	-5.22082	0.00015196	0.486288	6.89379	7.81204	5.99608	7.90036	6.1359	6.62631	6.1428	4.873	7.04034	6.02548	6.15366	6.66682	6.58054	6.58054	6.58054	6.46319	7.06129	6.57803	5.93909	5.81319	6.14943	7.75595	5.96209	4.56976	6.17358	7.15347	6.47117	6.85544	5.9638	6.67295	5.56972	7.88321	7.65135	6.04947	5.35814	7.04021	6.79748	5.93393	6.99824	5.56976	6.53643	6.75736	5.68244	6.43288	6.44386
CD320	6.03126e-06	-5.21959	0.000152051	-0.427058	2.93302	2.47602	3.88895	2.66456	3.98608	2.99143	3.70186	3.21893	3.17096	2.5148	3.72591	3.41072	3.22532	3.22532	3.22532	2.71529	1.43767	3.48672	3.27853	3.75732	3.05524	1.36291	3.64169	3.40124	3.09637	3.14236	2.76483	2.68596	3.54667	2.70278	2.33795	2.87031	2.66092	3.7042	3.34736	2.84594	3.13517	3.03014	3.30676	3.13825	2.64657	2.97545	2.96912	2.70394	2.81095
IL18R1	6.03259e-06	-5.2195	0.000152051	0.972237	7.86024	8.79547	7.32847	7.29	6.28255	6.58731	7.00808	5.36274	9.27188	6.23431	6.73625	6.99842	6.44011	6.44011	6.44011	6.20857	8.96267	5.49074	6.19986	5.48815	5.8492	8.86294	6.62376	4.12169	5.33513	7.28924	7.10562	7.82078	4.50709	8.68931	3.79841	8.41585	9.60058	5.79643	5.53788	7.79253	7.57769	4.40958	6.4216	5.85578	4.46057	7.73367	5.58622	6.54878	5.45806
ZC3HAV1	6.04885e-06	-5.21833	0.000152274	0.515002	9.53556	10.3947	9.21425	9.90865	8.32942	9.80262	8.56733	7.84317	9.36771	9.75	8.41118	9.2337	9.14239	9.14239	9.14239	8.87531	10.1111	9.20258	9.08962	8.55915	8.95775	10.3711	8.98142	7.59019	9.24437	9.08394	9.12896	9.3717	8.57884	9.19718	7.87278	10.4957	9.97208	8.96433	8.90649	9.50686	9.9585	7.94788	9.34921	8.72494	9.49466	9.48616	7.55846	8.74024	9.37395
MKRN1	6.1128e-06	-5.21376	0.000153695	0.66408	8.70826	8.15211	7.8413	8.31013	7.21403	7.60224	7.00033	6.7403	7.0829	9.51283	7.07348	9.46464	7.6919	7.6919	7.6919	9.7296	7.84857	8.27164	8.39879	9.32971	7.77632	8.25838	7.30959	7.51473	7.69564	8.69037	8.18759	7.96028	8.49759	9.24309	10.0317	8.40481	8.30397	7.14159	6.92589	7.88016	7.66511	9.15337	8.1497	6.67748	8.5174	7.76331	9.48133	7.90323	8.50293
MEIS1	6.15923e-06	-5.21047	0.000154674	-0.497919	3.31282	2.57096	3.35997	3.55357	3.71832	3.98694	3.12724	4.35037	2.26202	2.06279	3.79028	3.55387	3.28434	3.28434	3.28434	3.7963	3.32515	2.07891	4.00994	3.99283	3.08018	2.60609	3.85017	4.26782	2.97425	2.16275	3.94338	3.68041	4.12855	2.99842	2.98289	2.74566	4.12646	2.44205	3.25899	4.39738	4.92394	2.6006	1.71233	3.35783	2.65517	3.46422	3.02357	3.84568	3.30467
DENND5B	6.25257e-06	-5.20394	0.000156826	-0.661882	3.49194	2.75552	3.78702	3.05489	5.44956	3.55555	3.85408	3.03523	3.69461	2.90995	4.17486	3.25178	3.05703	3.05703	3.05703	3.33949	1.91556	2.43178	3.42129	3.71614	4.04674	1.86484	4.63693	4.05949	4.00653	1.63384	3.43534	3.85974	3.67534	1.73328	3.29738	1.50256	3.27112	3.71263	3.6934	3.25184	3.14254	2.80549	1.3687	3.94214	3.037	3.65359	3.01464	4.20101	2.99495
ZNF697	6.31986e-06	-5.19929	0.00015832	-0.394096	2.97497	3.20786	2.62499	1.79942	3.10197	2.83253	2.37476	2.70172	2.09058	2.759	3.02677	3.56518	3.08144	3.08144	3.08144	3.86724	3.05202	1.78425	3.46207	3.58501	2.22902	2.97209	3.38888	3.03682	2.18945	2.72585	3.5739	3.91203	2.47922	3.93593	3.80638	2.53583	1.91194	2.823	2.72799	2.96473	3.42857	4.27498	2.11741	1.94939	3.21034	3.52227	4.0804	2.88817	3.30467
MX1	6.37588e-06	-5.19546	0.000159529	0.862164	10.4305	10.9574	10.8282	8.57822	8.22062	10.984	8.97007	8.21712	10.4555	10.9474	9.33477	8.51428	9.99199	9.99199	9.99199	5.70726	10.9927	10.0228	9.85498	6.86766	9.74903	10.9567	9.61025	7.67914	10.5214	9.11724	10.1655	10.2878	9.68729	8.12297	6.15027	11.4459	10.0678	10.2457	9.84514	10.099	10.9523	6.55382	9.70768	9.88747	11.2437	9.91371	5.82723	9.73372	10.3687
ASPM	6.44063e-06	-5.19107	0.000160953	-0.594861	3.30968	2.09293	3.60597	2.89154	4.64379	2.47563	3.73212	3.71592	2.77753	1.81522	3.04448	3.73005	3.47146	3.47146	3.47146	3.71578	1.34001	5.66729	3.51841	3.80524	3.36365	2.51255	3.50209	3.28015	2.42523	1.95117	2.94161	3.85974	4.21578	2.45379	3.03127	3.23734	3.3366	3.28534	3.07713	3.17647	3.05926	3.61962	3.80117	2.68689	2.26371	2.90447	2.93164	2.75902	3.33228
CAPN5	6.45262e-06	-5.19026	0.000161057	0.602747	2.9916	1.89744	2.39795	2.66456	1.56244	2.698	2.71492	3.3253	1.0143	3.49175	2.31617	3	2.78707	2.78707	2.78707	4.34364	2.4125	2.44217	2.85722	3.64769	2.42349	2.80856	2.09055	2.54806	2.18945	2.30328	3.2095	1.7649	3.2449	3.13732	3.88369	2.30795	1.27411	2.18769	2.30001	1.89052	2.18671	2.91415	2.17074	1.90928	3.35983	1.75359	3.79753	2.61716	3.22591
ANKFY1	6.52243e-06	-5.18559	0.000162602	0.432947	7.51575	8.2662	7.70781	7.65682	6.75002	8.11656	6.55194	6.76237	7.32859	7.7646	6.78248	6.80802	7.27185	7.27185	7.27185	6.28031	7.95317	7.62719	7.04206	6.22277	6.59387	7.52097	6.75563	6.0103	7.55273	7.02911	7.07313	7.32559	7.46618	6.60808	6.75227	8.19914	7.8219	7.21426	7.04298	7.1748	7.83748	6.48163	7.36866	7.048	7.97936	7.39646	6.43456	7.22884	7.48171
ASL	6.53256e-06	-5.18492	0.000162657	0.303679	2.64869	2.88786	1.7966	2.60553	2.72373	2.50072	2.46761	2.60999	2.93789	2.19321	1.93466	2.50811	2.17737	2.17737	2.17737	2.06939	2.52787	2.43178	2.10636	2.7381	2.16828	2.1397	1.88752	2.11793	1.83913	2.6401	2.70577	2.23067	2.4052	3.4173	2.90344	2.66535	3.06581	2.57744	2.31104	2.02159	2.20091	2.4969	2.29605	2.08762	2.15879	2.37415	2.60253	2.02306	2.28386
SLC39A3	6.62123e-06	-5.17906	0.000164665	-0.281701	2.81264	2.50379	3.092	3.01007	2.44935	2.66509	3.09268	2.64122	2.46289	2.57983	3.17879	3.38541	2.63043	2.63043	2.63043	2.87212	2.36364	2.89991	3.24553	3.49046	2.5117	2.11446	2.8649	3.69192	2.57279	1.63384	2.52966	2.83785	2.93158	2.66245	2.99688	2.47431	2.45733	2.69271	2.49638	3.02847	2.88552	2.54968	1.92904	2.77138	2.5668	2.80666	3.10158	3.1441	2.98628
FIG4	6.63626e-06	-5.17808	0.000164839	0.337522	5.35797	5.79624	5.07615	6.21841	5.2851	5.22193	4.74436	4.52793	4.92666	5.21407	4.80339	4.55652	5.11262	5.11262	5.11262	4.87278	5.44839	5.28087	4.45596	4.36738	4.55367	5.29519	4.57059	4.33015	5.14303	5.20957	5.05784	5.42202	4.9766	5.05345	4.85848	5.92923	6.05418	4.88793	4.85415	5.18985	5.11227	5.04581	4.70228	4.87361	5.35197	5.01318	5.12678	5.32762	4.94641
STIMATE	6.68763e-06	-5.17473	0.000165797	0.361491	1.83848	2.01788	1.12614	2.37755	0.783634	2.13464	1.87557	0.90686	0.948865	2.01656	1.27148	0.776898	1.60026	1.60026	1.60026	1.24223	0.830266	2.2425	1.3755	0.753574	1.41072	1.22818	0.91924	2.07886	2.53009	1.52322	1.47278	0.910907	1.9645	1.30586	1.43651	1.64896	2.44041	1.80176	1.3034	0.959505	1.23023	1.41018	2.01904	1.35383	2.22958	0.836871	1.35582	1.22133	1.93349
EXOC7	6.69096e-06	-5.17451	0.000165797	0.186072	7.10427	7.52837	7.54517	7.41559	6.90901	7.39665	6.84242	6.46727	7.2936	7.06287	7.00336	7.23106	6.884	6.884	6.884	6.8623	7.1723	6.89898	6.88273	6.8775	6.68477	7.28961	6.66969	6.69195	6.92579	7.08453	6.68407	7.16113	7.31888	7.22366	6.91535	7.02699	7.25696	7.03008	6.8891	7.06606	6.69461	6.87611	6.80515	6.74362	6.98178	7.09119	6.75666	7.15247	7.03092
MFSD1	6.7079e-06	-5.17341	0.000166016	0.330673	6.35779	6.75718	5.63129	6.16575	6.06276	5.82252	5.55058	5.79056	6.20664	6.11961	5.74099	5.91361	6.23505	6.23505	6.23505	6.47022	6.40293	5.87341	5.8085	6.71139	5.59749	6.57556	5.43841	5.74818	5.8365	6.50631	5.85241	6.2997	5.95851	6.57722	5.9908	5.90903	6.62341	5.59459	5.36742	6.23856	5.89246	6.51652	5.30135	5.26791	6.34911	5.88971	6.4896	5.87454	5.87894
LRRC59	6.85177e-06	-5.1642	0.000169373	-0.253389	5.61012	5.90697	5.81371	5.95433	6.53616	5.48496	5.46082	5.26087	5.68044	5.47707	5.83809	5.87094	5.95277	5.95277	5.95277	5.77553	5.23236	6.16697	5.5054	6.10884	5.34136	5.36108	5.58795	5.68886	5.26957	5.05248	5.13821	6.16971	5.74734	5.15505	5.47795	5.23862	5.7844	5.63173	5.14971	5.70697	5.36806	5.76005	4.97763	5.12489	5.87328	5.55053	5.55112	5.75318	5.57245
MT1L	6.86844e-06	-5.16314	0.000169581	1.26204	0.777563	-1.41995	-1.86814	-2.05893	-2.86392	-2.7668	-0.91039	0.0411728	-1.65257	-0.590195	-2.31977	0.375647	-0.207517	-0.207517	-0.207517	0.688401	-0.676741	-0.0204538	0.40269	-0.173495	1.4367	0.913827	-3.60389	-2.59648	0.338127	0.96947	-0.593457	-2.13302	-0.845838	1.84561	2.15045	0.46559	-2.49476	-2.05704	-0.887194	-2.46126	-1.13715	-0.310035	-2.23257	-1.59168	-1.86826	-3.00147	0.770621	-1.72288	-0.57818
AC138951.1	6.88946e-06	-5.16181	0.000169896	0.887075	0.144584	-3.27341	-0.711284	-0.418203	-2.46302	-2.03209	0.739669	1.70279	0.732608	-1.6763	0.54413	1.21061	-1.18462	-1.18462	-1.18462	-0.639594	0.0960209	0.191583	-0.179288	1.07357	0.914989	0.0609361	-0.434367	1.06928	-1.83269	-1.84472	1.63985	-1.65612	-0.781556	0.171493	-3.50848	-1.08001	-1.4363	-0.978129	-1.50758	0.146905	-1.0009	-0.851519	-0.140326	0.280205	0.69704	-0.992975	-1.31916	-3.44815	-1.79589
AC007728.2	6.92694e-06	-5.15946	0.000170571	0.360933	3.76658	4.70636	3.157	4.22741	3.6441	3.91411	3.28355	2.86933	3.17096	3.75373	2.93484	3.04109	3.47608	3.47608	3.47608	3.17714	3.77624	3.781	3.39143	3.39973	3.42335	3.67984	3.09332	3.00938	4.0873	3.80169	3.75958	3.62405	3.59892	3.44133	3.07148	4.53415	4.05044	3.26256	3.30936	3.47412	3.62567	3.45227	4.05628	3.21705	4.13761	2.98924	2.9505	3.47542	3.93303
MS4A6A	6.93344e-06	-5.15905	0.000170571	0.430067	7.33594	7.68135	6.53773	6.9064	6.35026	7.19623	6.80064	6.81523	6.88282	7.05717	5.93974	6.83689	7.30268	7.30268	7.30268	7.37983	7.64159	6.91307	6.61982	6.47815	6.39782	8.4136	5.87826	6.02579	6.69478	7.39446	7.05179	6.95953	7.04222	7.05379	6.97619	7.76173	6.99402	6.41429	5.79222	7.09146	7.00998	7.54924	6.24558	5.59316	7.70003	6.91642	7.72073	6.4794	7.25797
ESAM	7.00695e-06	-5.15447	0.000171979	-0.603814	5.1146	4.06646	6.03489	6.3613	5.19612	5.5495	4.69337	5.25919	4.26436	4.31163	5.79559	6.01402	4.72805	4.72805	4.72805	5.82297	5.02999	3.74786	6.12201	6.31462	5.23986	4.83995	5.57805	6.13458	4.35127	4.10029	4.68233	5.47658	5.75684	4.8993	4.18799	4.77004	5.9579	3.87164	5.27609	5.45197	5.85815	4.04061	3.14959	4.80966	3.51429	4.44857	5.24226	6.13963	5.1656
LINC02555	7.00743e-06	-5.15444	0.000171979	0.8839	3.92411	5.10343	2.59849	5.14488	3.92887	4.28649	2.67654	3.72567	2.48614	3.6616	2.77435	1.23914	2.67924	2.67924	2.67924	2.45678	3.7288	2.83827	2.5786	2.65336	3.51157	3.69694	3.43348	1.31324	4.0725	0.0592382	2.79348	3.33583	2.78539	2.5117	0.221803	5.52315	5.91567	2.25849	2.53452	2.85476	4.81967	1.26621	3.85103	2.67099	3.71675	2.04513	0.968652	4.1504	2.53022
LPIN2	7.01582e-06	-5.15392	0.00017198	0.427142	7.92622	8.35225	7.91898	8.33703	7.49624	8.01274	6.63936	6.95175	7.85989	8.15886	7.2306	8.39335	7.16561	7.16561	7.16561	7.69952	8.20601	7.78408	7.48703	7.52025	7.11161	7.74314	7.3012	6.88552	7.82051	7.63122	7.31708	7.45863	7.42718	8.13038	7.62822	8.02303	8.31271	7.39926	7.35317	7.68725	7.80822	7.75626	7.84383	6.90998	7.94887	7.61115	7.41178	7.53892	7.69111
KDM1B	7.03938e-06	-5.15247	0.000172352	0.30135	6.67459	7.08646	6.46899	7.00819	6.47396	6.91698	5.71111	6.01872	6.76301	6.88826	6.06753	6.67924	6.58214	6.58214	6.58214	6.61599	6.81151	6.7247	5.96567	6.1908	5.76453	7.06917	5.9825	5.61567	6.39798	6.8602	6.533	6.84034	6.36441	6.02679	6.27174	6.40981	7.13608	6.06354	6.16475	6.71902	6.72071	6.42129	5.91727	5.91606	7.44571	6.67232	6.38689	6.67766	6.07041
BMP2	7.06241e-06	-5.15105	0.00017271	-0.803647	0.0677088	-4.34055	-1.37255	-0.191909	0.35776	-0.18654	0.960224	1.3715	1.24988	-1.89452	-0.314619	-0.341992	-1.30603	-1.30603	-1.30603	1.06784	0.265191	-2.58702	0.082255	0.341756	0.215045	-0.0488636	1.25365	0.958837	-1.33486	0.0592382	1.84535	0.106256	-2.72963	-0.382196	-1.33657	-0.258136	1.41933	-0.775917	-0.531498	-2.46126	-1.64585	-1.08908	-1.26169	-0.87937	-1.68349	-2.62034	-0.996625	0.799024	-1.79589
AC114763.1	7.26657e-06	-5.13867	0.000177424	0.389104	2.24953	1.81118	1.12614	3.09836	2.25025	1.77212	0.826376	1.09904	2.61829	1.9194	1.38701	1.90586	0.688565	0.688565	0.688565	2.70341	2.19234	1.87913	1.7017	1.98899	1.62928	1.95293	1.80845	1.75454	1.63931	2.58609	2.77923	2.14587	1.28238	2.88031	1.97783	1.73016	2.92695	1.90834	1.771	2.17027	2.18671	2.5288	1.95967	1.27183	1.78867	2.15928	1.51634	2.19271	1.74093
WEE1	7.27248e-06	-5.13832	0.000177424	-0.433459	2.99009	1.91823	3.47369	2.46316	3.74224	2.5616	2.91942	3.27309	2.20711	2.3	3.51352	3.07313	3.07538	3.07538	3.07538	2.38421	1.99792	4.43231	2.71983	3.40492	3.50544	2.28255	3.70127	3.57977	2.93114	2.36872	3.29212	3.1451	3.57149	2.53422	3.29171	2.53583	2.3345	3.42012	3.09639	2.82814	2.93733	3.11666	3.40462	2.97942	2.46291	2.46574	2.83345	2.87161	3.2694
YBX1	7.38709e-06	-5.13153	0.00017992	0.546491	7.45173	6.47716	7.03188	7.80479	6.53753	6.72142	6.60809	6.43868	6.07865	7.8909	6.09221	7.54032	7.16239	7.16239	7.16239	9.01525	6.21601	7.38633	6.93334	8.37972	6.53344	7.02073	6.6836	7.11368	6.89387	6.0178	6.61954	6.63917	7.74379	7.18548	8.62902	6.84681	6.8128	6.61199	5.93541	6.48279	6.39448	7.97925	6.33664	5.87239	7.49173	6.39202	8.14022	6.60686	7.40578
STX1A	7.3923e-06	-5.13122	0.00017992	-0.380953	1.78611	0.874507	2.18291	1.87634	2.19586	2.31519	2.01747	2.84271	1.0769	0.625433	2.21036	2.15078	1.42056	1.42056	1.42056	1.4556	1.1223	1.30382	2.44546	2.60904	2.31559	0.658332	1.82193	2.67576	1.43843	1.89305	2.24855	1.78373	1.76373	2.29138	1.43651	1.43957	2.25931	1.07835	1.56531	1.90757	2.21497	1.13418	1.47853	1.46869	0.99669	1.73734	1.98734	1.83078	1.91535
JADE2	7.43808e-06	-5.12854	0.00018082	0.396557	7.10009	7.65451	7.6117	6.75251	6.65746	7.70667	6.93922	6.81922	7.41517	7.62038	6.66936	6.69091	7.00818	7.00818	7.00818	5.85152	7.10885	7.15111	6.68464	5.90034	6.95186	6.11814	6.75826	6.61949	7.50896	6.42788	5.92703	6.13621	7.2614	7.40761	6.51531	6.92578	7.38572	7.38351	7.39394	6.4151	6.84742	6.4042	7.30411	7.34881	7.39272	6.77138	6.46931	6.86088	6.99898
CENPA	7.52415e-06	-5.12354	0.000182696	-0.572274	0.267524	-1.05335	-0.259559	0.329661	1.37935	0.102796	0.288758	1.21427	1.35465	-0.590195	0.270914	1.12147	-0.0938156	-0.0938156	-0.0938156	0.101419	-0.165655	1.76782	0.953328	1.07357	0.330423	-0.597457	0.787997	0.870077	-0.427586	-0.978629	1.36238	1.07279	0.0887066	0.051699	0.268676	-0.483742	0.340214	0.389154	-0.381909	0.203224	0.531452	-0.851519	1.06496	0.0535989	-0.802644	0.373324	-0.733186	-0.549365	0.656834
BTK	7.59006e-06	-5.11975	0.000184079	0.254662	6.29498	6.44977	5.7292	6.35235	6.53958	6.31944	5.76057	5.65562	6.05552	6.20455	5.8482	5.99428	6.30928	6.30928	6.30928	6.12641	6.24918	5.83349	5.76724	6.08801	5.81245	6.7017	5.77026	5.52773	6.03664	6.30927	5.97159	6.46707	6.0781	6.03274	5.84763	6.22256	6.24042	5.89045	5.77341	6.27597	6.51588	6.29326	5.45168	5.52953	6.58448	5.98653	6.08366	6.13356	5.82895
AK3P3	7.61928e-06	-5.11809	0.00018457	0.32624	0.233809	-1.05335	-0.0776089	0.175847	-1.03096	-0.548841	-0.505476	-0.670686	-0.0815063	0.540853	-0.993719	-0.341992	0.0115755	0.0115755	0.0115755	-0.134116	0.210975	0.460646	0.197158	-0.689037	0.0225843	0.162967	0.0961325	-0.0332443	-0.811046	0.43009	-1.35796	-0.568039	0.0887066	0.112839	0.0712903	-0.366533	1.06925	0.210222	0.416097	-0.0365812	-0.37728	0.391179	0.042475	-0.546208	0.133874	-0.123802	-0.230091	0.397565	-0.138532
AL139174.1	7.63163e-06	-5.11738	0.000184651	0.796716	0.371747	0.370464	-0.259559	0.595407	-1.16688	0.501159	-0.819805	-0.670686	0.478119	0.304776	-1.14603	-0.620872	-0.465944	-0.465944	-0.465944	-1.42446	0.317442	0.883182	-2.46587	-0.689037	-1.04618	0.511333	-1.40261	-2.59648	0.580624	0.852335	-0.0963874	-0.0187021	-1.30658	-1.14183	-0.967205	1.59217	-0.676605	-0.517488	-2.31811	-0.173303	-0.464237	-0.965416	-0.889987	-0.338747	1.75707	-0.00972878	-1.31916	-0.462784	-0.298692
QPCTL	7.68242e-06	-5.1145	0.000185662	-0.428358	1.4427	0.874507	1.51422	0.654842	2.39003	1.31535	2.25482	1.905	1.0143	1.07973	1.85664	1.42447	1.63366	1.63366	1.63366	1.17498	0.934317	1.41356	1.24803	1.81265	1.60656	0.162967	2.11266	2.48968	1.34296	-0.0505548	1.57532	1.64643	1.50488	0.735224	1.76547	0.80242	0.978403	1.75355	1.21221	0.588689	1.08466	1.58221	1.19936	1.52287	1.24468	1.34557	1.43831	1.3465	1.63407
H2BU1	7.70539e-06	-5.11321	0.000185998	0.61746	2.89382	0.693441	2.7017	2.16913	3.20882	1.9096	3.14984	2.09741	2.02859	2.42326	2.74217	2.53137	2.82371	2.82371	2.82371	3.38483	1.09262	3.65706	2.25965	3.86676	3.12082	2.00881	2.05673	3.20351	1.95128	1.52322	1.43691	2.18889	2.30515	2.18151	3.56485	1.88001	1.31181	2.11324	1.96503	1.72727	1.36245	3.44672	2.31985	2.16915	2.40293	1.63583	3.07604	0.964395	2.31186
DLGAP5	7.78295e-06	-5.10886	0.000187649	-0.625628	1.39388	-0.129198	2.05231	0.766836	2.63453	1.22791	1.73323	2.19884	0.948865	-0.688887	1.70904	1.61068	1.81929	1.81929	1.81929	1.69042	0.367867	4.06285	1.01728	2.3101	1.24413	-0.774792	1.73908	1.70408	0.739012	0.0592382	2.30932	1.89184	1.93611	-0.0121473	1.06382	1.11616	1.61297	1.17911	1.01048	1.22733	1.23023	0.926339	1.86576	0.88739	0.229077	0.494266	1.04083	0.727176	1.80145
TLR2	7.84101e-06	-5.10563	0.000188828	0.566806	9.61845	10.6494	9.09757	9.9116	8.98285	8.90674	8.29177	7.41512	10.2374	9.19573	9.15584	9.11423	9.00547	9.00547	9.00547	9.23661	10.3554	8.1853	8.56531	9.06542	8.60052	10.1175	8.72461	7.70289	8.43714	9.05586	8.89784	9.73029	8.08905	10.9107	7.76681	10.0066	10.8512	8.5447	8.22176	9.69384	9.79304	8.51378	8.75819	8.16346	8.06914	9.53735	8.95766	9.41538	8.98259
KCNQ5	7.96642e-06	-5.09874	0.000191623	-0.453148	1.96551	1.64656	2.71409	0.967696	2.97046	1.31535	2.50314	2.38252	0.56803	2.00081	2.22596	2.13569	1.8901	1.8901	1.8901	1.69042	1.28858	2.41076	1.98366	2.15846	2.57156	1.40517	2.15589	3.13532	2.31215	2.56763	1.92519	1.4244	2.22136	1.07953	1.94934	0.527476	1.06925	1.96589	2.35434	2.02159	2.15788	1.69897	1.79958	2.52819	1.26729	2.35298	1.5661	2.19271	2.26965
MINAR1	8.00952e-06	-5.09639	0.000192435	-0.466656	1.07033	-0.761282	0.927545	0.819733	1.1411	0.643123	2.06579	2.05166	0.56803	0.852958	0.686237	1.52058	1.32156	1.32156	1.32156	0.952108	0.793845	1.16006	1.32586	1.66463	1.87713	0.0609361	1.23362	2.21723	0.688124	1.52322	2.11873	1.04184	1.20517	0.282099	0.560012	0.698642	-1.20575	1.58014	0.807382	1.11438	0.485788	0.645135	1.22481	0.967712	0.854631	0.675715	0.267824	0.487292	1.98658
PDCD4-AS1	8.03219e-06	-5.09517	0.000192754	0.474436	3.26826	4.20823	3.21921	4.32211	3.11668	2.90949	2.33588	2.62048	3.25458	3.28628	2.30152	3.25876	2.30724	2.30724	2.30724	3.72169	3.8446	2.51293	2.69071	3.25769	3.22886	2.99993	2.64738	3.19135	2.81735	2.80679	3.67743	2.95879	2.27524	4.08068	2.47417	3.68031	4.20369	2.47215	2.2777	2.95656	3.4346	3.04493	2.72836	2.40859	2.55766	2.48533	2.88338	2.65637	3.11901
MDM2	8.05483e-06	-5.09394	0.000193072	0.410382	7.81081	8.64579	7.27717	7.57168	7.34397	7.68699	6.96851	7.00122	7.67687	7.60484	7.18593	6.80385	7.45087	7.45087	7.45087	7.53034	8.46608	7.07799	6.96763	6.74761	7.19676	7.69179	7.09662	6.8194	7.31872	7.5809	7.05919	7.67393	7.23639	9.22233	7.8438	7.61801	8.47909	7.13219	7.00103	7.1827	7.45679	7.33777	7.52179	6.93225	7.31686	7.33604	7.67751	7.75643	7.29965
HID1	8.08614e-06	-5.09226	0.000193596	-0.557316	1.2778	0.10638	1.56985	0.920042	2.76166	0.92843	2.23383	3.18401	1.71102	0.665934	1.59353	1.3215	0.895482	0.895482	0.895482	0.91137	1.06232	0.913388	1.86702	2.27649	1.2144	0.162967	1.97461	2.16844	0.199655	-0.441216	2.62838	1.7649	1.15677	0.655276	1.21508	0.46559	0.777501	1.83302	1.63718	1.14346	1.17375	0.827198	-0.0159224	2.05121	0.520099	1.16302	1.00519	1.24725	0.741638
CDK2AP1	8.17319e-06	-5.08761	0.000195452	-0.410062	3.94613	3.38255	3.61921	5.00057	3.18109	3.69251	3.25778	3.89499	3.18524	3.84033	3.83674	3.58755	3.81139	3.81139	3.81139	5.05447	3.60813	3.75205	4.29435	4.86808	3.55373	3.60023	3.45094	4.74431	2.9636	3.20342	3.4444	4.37328	3.73149	3.43536	4.78783	3.04973	4.44333	3.10499	3.43567	3.863	3.85399	4.18774	2.8961	2.92009	3.87967	3.35666	4.85375	4.32787	3.91488
IGF1	8.20926e-06	-5.0857	0.000196087	-0.847301	0.314175	-1.22503	0.296705	-0.686718	2.67486	0.228262	0.647417	1.34645	1.82482	-4.34055	1.35898	-0.5218	0.839328	0.839328	0.839328	0.535949	0.0349158	-0.845121	0.495426	1.12483	0.799578	-0.597457	1.58944	1.37905	-1.33486	-0.441216	1.40013	0.840698	-0.174693	0.48072	-1.33657	-0.258136	0.186351	0.91263	-0.183114	0.257426	0.575715	-0.965416	-1.76372	0.361739	-2.08021	-0.532773	-0.230091	-0.381105	0.0726183
PHLDA1	8.22679e-06	-5.08477	0.000196277	-0.345328	1.92864	0.693441	2.44333	0.654842	1.56244	1.13482	1.57528	2.45461	3.09738	1.55981	2.33068	2.37303	1.71393	1.71393	1.71393	1.59074	1.69631	2.43178	2.99065	2.33208	2.19897	1.13081	2.2184	2.40796	1.66585	2.16275	2.57986	1.60467	2.46604	1.91591	2.00577	2.09964	1.41933	1.7205	1.54676	2.12725	1.61663	1.98619	2.33161	1.39314	1.15054	1.58226	1.93148	1.89776	2.10335
CSF1	8.31604e-06	-5.08008	0.000198177	-0.506519	5.29285	5.97798	5.92721	4.66698	5.86128	5.09177	4.90406	5.25584	6.81098	4.00724	5.89286	5.61066	3.95373	3.95373	3.95373	3.6859	4.85544	5.33766	5.02727	5.51121	5.0509	6.02298	5.34811	4.80742	4.77665	4.70514	5.99952	5.68253	5.0099	7.14945	3.86093	7.28222	6.12472	4.71831	4.35722	6.28497	6.23543	4.99342	5.99233	4.63004	4.83247	4.73703	5.00125	4.4886	5.71559
PNPT1	8.33852e-06	-5.07891	0.000198261	0.748892	5.32532	4.29024	5.22217	2.8284	3.70865	6.10511	4.13737	4.16942	4.47076	5.87381	4.32002	3.17263	5.14193	5.14193	5.14193	2.85073	5.43219	5.80255	4.73566	3.10651	4.77095	4.92953	4.29653	3.21557	6.13373	3.87109	4.15686	4.42218	4.67398	2.47723	3.4373	6.16653	3.64054	5.44072	4.5441	4.21424	4.95569	3.28177	4.80916	5.37978	6.4396	4.59099	3.43865	4.26266	5.36087
SLC35E3	8.3389e-06	-5.07889	0.000198261	0.367254	5.7376	6.45689	4.87831	5.40282	5.42761	5.23694	4.9024	4.95191	5.66269	5.41754	5.26449	4.81526	5.30241	5.30241	5.30241	5.38157	6.05606	4.87174	5.07125	4.76482	4.98859	4.97582	4.99483	4.73805	5.22118	5.80378	5.66552	5.44291	5.18499	7.25196	5.91732	5.57353	6.29203	5.44452	5.01624	5.14022	5.51595	5.48852	5.44628	4.99037	5.12479	5.40898	5.75933	5.88077	5.59826
RNF208	8.38994e-06	-5.07624	0.000199244	-0.720783	2.06486	0.308835	2.9629	3.9052	1.9387	3.00902	1.45343	2.65148	1.82482	1.3016	2.09616	3.13517	0.520189	0.520189	0.520189	3.28472	1.09262	1.02826	3.01435	3.55729	2.38397	-1.21229	1.96248	4.26202	0.926314	-0.0505548	1.40013	2.78275	2.58053	1.59012	1.23881	0.333234	3.20254	1.50448	2.30001	2.46332	1.98813	1.33999	0.152624	1.06829	-0.544624	1.96368	1.7496	3.0218	2.18132
TMEM258	8.42233e-06	-5.07457	0.000199782	-0.247755	3.69403	4.05712	4.03938	3.52199	4.14881	3.96457	4.1598	3.60415	3.58043	3.45178	3.81628	3.99971	4.25677	4.25677	4.25677	3.6859	2.99701	3.90268	3.96199	4.05361	4.16026	3.29782	4.27952	4.23857	3.76396	3.09158	3.38916	4.05454	3.76416	3.22992	3.44242	3.25574	3.51688	3.69146	3.3739	3.76817	3.39808	3.51201	3.27667	3.63291	3.67931	3.3244	3.59666	3.42522	3.81079
PRPS2	8.47963e-06	-5.07162	0.00020091	-0.330487	3.36459	3.98507	3.73323	5.44972	3.90364	3.46922	3.9114	4.1296	3.05136	3.45755	3.44852	3.18001	3.74417	3.74417	3.74417	2.94457	2.6347	4.53059	3.54577	3.39452	3.251	2.80856	3.25613	3.22156	3.36289	3.10444	2.32903	3.22306	4.0087	2.34333	3.25144	4.01874	5.0455	3.37835	3.19494	3.16942	3.17887	3.34884	3.68223	3.37757	3.33329	3.1756	3.13494	3.44214	3.19617
FAM214B	8.49056e-06	-5.07106	0.000200937	0.398117	6.96462	6.63224	6.50332	7.04683	6.28418	6.66497	5.90785	5.3423	6.86298	7.00386	6.41244	7.12469	6.30992	6.30992	6.30992	7.39329	6.99114	6.10206	6.73246	7.37001	6.48679	7.62408	5.84481	6.52938	6.40193	7.33975	6.87711	6.80448	6.38993	7.25916	7.37399	6.68226	7.38351	5.88766	5.79222	6.8204	6.31918	7.34787	6.24946	5.51178	6.67444	6.50848	7.26929	6.72627	6.73121
POPDC2	8.56302e-06	-5.06737	0.000202411	0.271645	1.74366	2.26506	1.64946	1.66133	0.924079	1.75136	0.769154	1.39611	0.652664	1.32708	1.5446	1.26712	1.68235	1.68235	1.68235	1.5647	1.79175	1.47561	1.6821	1.07357	1.81904	1.8948	1.68107	1.31324	1.88504	1.48438	1.01853	1.4244	1.66338	1.94982	1.037	1.994	1.48681	1.66945	1.6546	1.6279	1.86869	1.77187	2.01904	1.60887	1.99237	1.73734	1.32724	1.89776	2.07094
CDCA8	8.58178e-06	-5.06642	0.000202411	-0.463846	1.58725	1.48876	1.7966	1.44268	2.75227	1.37083	1.87557	2.2936	1.86085	0.355183	1.68667	2.25225	1.78996	1.78996	1.78996	0.991727	0.967398	3.53123	2.04631	2.3856	1.32983	-0.439553	1.87464	1.40034	0.926314	1.12907	1.57532	1.70688	1.74203	1.4784	0.953391	1.78186	2.00693	1.81748	1.50895	1.6279	1.08466	1.54108	1.76531	1.01888	0.793644	1.40848	1.20691	1.05522	1.65609
SIGLEC7	8.58243e-06	-5.06639	0.000202411	0.388055	4.73734	5.42539	4.407	4.73741	4.23561	4.79997	3.76908	3.8242	4.93935	4.83341	4.75044	4.26548	4.72611	4.72611	4.72611	5.21163	5.2907	3.86454	4.42092	3.88917	3.20638	5.14744	3.78282	4.08601	4.28004	4.42139	4.56261	4.53208	4.15343	3.75597	4.76757	3.33576	3.36377	4.36426	3.99298	5.08883	4.62804	4.47108	3.99106	4.11376	5.0222	4.82998	4.79235	4.97893	4.58546
LINC00513	8.62653e-06	-5.06416	0.000203218	1.06979	1.01593	0.0320472	-0.85039	1.82552	-1.16688	-2.7668	-0.654097	0.0411728	1.71102	-1.31931	-0.407843	-0.9669	-1.4386	-1.4386	-1.4386	-0.639594	-0.398683	-1.46775	-0.412175	0.252387	-1.55943	0.586704	-0.499953	-0.962155	-1.13835	0.58498	1.47278	0.164897	-0.660995	1.16861	-1.20266	0.46559	0.881446	-0.978129	-1.85666	-0.173303	-0.876407	-2.19999	-0.686571	-1.93689	-1.51973	-0.0656384	-0.858901	-0.641476	-2.37677
FANCB	8.64716e-06	-5.06313	0.000203471	-0.332604	1.87964	1.21408	1.12614	1.57165	2.28973	1.81275	1.9288	1.8526	0.948865	1.96879	1.59353	2.05774	2.44532	2.44532	2.44532	2.29201	1.1223	2.28932	2.01533	2.08271	1.89598	1.36291	1.98663	2.02506	1.9938	2.34724	1.63985	2.23067	2.41209	1.86351	2.3046	1.50256	1.70084	2.06138	1.75494	1.92442	1.86869	1.68015	1.98966	1.8819	1.53286	2.04513	2.14303	1.86466	2.05446
SLC27A3	8.66899e-06	-5.06203	0.000203751	0.455577	5.43601	6.39984	5.73225	5.47055	4.40399	6.10409	4.82905	4.3153	5.77315	5.6205	4.64993	4.70197	5.24953	5.24953	5.24953	4.32049	5.35617	5.17732	5.36652	4.03698	4.88859	5.37709	4.59238	4.65415	5.45222	4.26404	5.29169	5.06785	5.42012	4.36454	4.71777	6.62591	5.36755	5.04137	4.5901	5.06433	5.41602	5.10873	5.11493	4.43191	6.13611	4.96167	4.548	5.26239	5.571
KRT8P12	8.81038e-06	-5.05501	0.000206837	0.315225	3.10492	3.20786	2.41324	3.70184	2.84354	2.88111	2.91942	2.8868	3.22724	3.08444	2.45503	2.33388	2.90118	2.90118	2.90118	3.07939	2.43633	2.60834	2.66099	2.8259	3.17585	3.342	2.57756	2.5764	3.25339	2.54893	2.73561	2.84684	2.87786	3.39286	2.61687	3.19982	2.96293	2.65821	2.65195	2.8895	3.2143	3.28177	2.66472	2.58871	3.28978	2.83747	3.12668	2.90455	2.51825
LRSAM1	8.82331e-06	-5.05437	0.000206905	0.241984	5.1233	5.062	4.80487	5.42646	4.6387	5.36883	4.84125	4.4595	5.57324	5.10599	4.99539	5.3047	4.78675	4.78675	4.78675	4.8406	5.15011	4.92831	4.50418	4.70292	4.72951	5.19639	4.71126	4.48762	4.90753	5.39899	5.08995	5.14452	4.89044	4.80519	4.90928	4.89268	5.50205	5.04638	5.05939	5.3213	4.82884	4.91311	4.80706	4.82412	4.65312	5.14833	4.70063	5.09409	4.75824
CLPP	8.94467e-06	-5.04844	0.000209511	-0.260182	4.12301	4.05712	4.47777	4.21758	4.5682	4.00459	4.42124	4.30559	4.13058	3.97134	4.36298	4.23393	4.2406	4.2406	4.2406	4.42548	3.51051	4.76605	4.34818	4.46757	4.25458	3.32008	4.51564	4.89438	4.12126	3.49478	3.86457	4.14472	4.48112	3.80311	4.29658	3.75981	3.7198	4.26745	4.10495	4.03964	3.92842	4.40958	4.47467	4.21321	4.00266	3.95344	4.36681	3.92409	4.32531
MYL9	8.97831e-06	-5.04681	0.00021006	-0.871955	6.395	3.59753	7.32696	7.82877	6.22261	6.5968	4.75546	4.1977	5.04098	4.57353	6.43695	7.17216	4.79969	4.79969	4.79969	7.25361	5.26765	4.49358	6.93386	8.25118	6.58373	5.19338	5.97044	7.92317	5.24997	4.59095	5.74284	7.52064	5.708	6.34134	5.39192	5.16509	8.56184	5.47829	6.54823	6.74533	5.70093	6.6324	2.64601	4.89088	3.037	5.29567	6.17771	6.60059	6.33549
CDC45	9.03624e-06	-5.04401	0.000211175	-0.591382	0.69454	-0.31076	1.26742	0.400825	1.74397	-0.108587	1.55849	2.11235	0.38223	-1.03337	0.895806	0.737443	0.446922	0.446922	0.446922	0.424559	0.638204	2.80644	1.07852	2.02991	0.384827	-0.597457	1.06243	1.56019	0.739012	-0.599106	1.84535	1.70688	1.08962	0.526378	0.314074	0.400929	-0.0804082	0.758324	0.195787	0.257426	0.740322	0.245196	1.17347	0.400841	-1.00448	-0.00972878	-0.510505	0.199407	1.16658
OPTN	9.09523e-06	-5.04119	0.000212312	0.561089	5.86171	4.50812	6.18159	4.76127	4.57887	5.31327	5.14802	5.5676	3.96668	6.69203	5.13414	6.05171	5.26693	5.26693	5.26693	7.2196	4.6894	6.11024	5.55607	6.07259	5.56251	5.11599	5.03446	5.63713	5.75694	5.13002	5.40277	4.80754	6.46057	5.5192	6.43668	5.59897	4.9381	5.5161	5.03963	5.09814	5.0587	5.43761	5.69637	4.96776	5.70753	5.05638	6.02147	5.20569	6.05185
SP140L	9.21343e-06	-5.03558	0.000214827	0.336889	5.56714	5.83775	5.75643	5.79505	5.24045	5.92222	4.92222	5.28249	4.84359	5.52877	5.02467	4.79619	5.49304	5.49304	5.49304	4.6801	5.28415	6.11512	5.23485	4.65578	5.26364	4.99324	4.93249	4.82523	6.0019	5.31294	4.68233	4.94565	5.6654	4.48506	5.28625	5.91483	5.32209	5.57044	5.4065	5.17935	5.52303	4.93112	5.81942	5.47904	6.04583	5.25346	4.74452	5.36212	5.7909
RTCA-AS1	9.22527e-06	-5.03502	0.000214859	0.435126	3.46795	3.7846	1.7249	2.72127	3.62879	3.18184	3.52304	3.73051	3.52538	4.09143	3.26438	2.71524	3.52139	3.52139	3.52139	3.53987	3.62896	2.95903	2.94205	3.39973	3.2728	2.43309	3.4466	2.69311	3.1999	2.52998	3.2306	3.63964	3.24104	3.87105	2.84277	3.06024	2.97473	3.357	3.05106	3.43937	3.71743	2.77033	2.79781	3.7511	3.06308	3.11402	3.60263	3.31925	3.14259
EIF4EBP3	9.35408e-06	-5.029	0.000217612	0.477861	-0.846307	-1.22503	-0.259559	-1.72004	-1.16688	-0.896434	-1.34325	-1.87836	-1.29462	-1.03337	-1.99647	-0.259848	-1.93015	-1.93015	-1.93015	-1.64976	-1.15753	-1.31987	-1.67734	-1.66299	-2.0431	-1.84325	-1.67822	-1.19771	-1.5624	-1.84472	-0.452239	-1.87496	-1.21883	-0.469132	-0.862477	-0.366533	-0.536029	-2.05704	-1.36033	-1.672	-1.865	-1.54015	-2.23257	-1.75398	-1.37267	-1.50876	-1.73521	-1.08314	-1.3829
CCDC170	9.43711e-06	-5.02516	0.000219295	0.59784	1.97903	2.07453	0.158404	0.654842	1.56244	1.31535	1.01047	1.98831	0.808353	2.01656	0.270914	1.1518	1.65007	1.65007	1.65007	-0.0512577	1.57278	1.6291	1.04823	1.68185	1.5362	1.70489	0.413608	1.01512	0.835701	1.52322	2.83541	1.35053	0.674277	3.78444	2.08648	3.18069	1.31181	0.11168	0.495591	1.76518	0.438631	2.78802	1.60016	0.321548	2.51107	0.0959823	2.68368	0.530146	1.74093
AC069304.2	9.61907e-06	-5.01687	0.000222935	0.755314	-0.00393837	-0.217125	-0.467813	-0.0908156	-0.408508	-1.76962	0.115937	0.217269	-4.34055	0.921469	-1.14603	-1.61393	-0.87181	-0.87181	-0.87181	-0.639594	-0.57798	0.376413	-1.03448	-1.35143	-1.55943	-2.3058	0.139853	-1.47937	0.580624	-0.776423	-0.925651	-2.85028	-0.660995	-2.44248	-1.20266	0.400929	-0.290306	-0.367794	-0.698412	-1.4824	-1.0009	-0.745959	0.042475	0.43891	0.274421	0.806048	-0.230091	0.199407	0.0726183
DMWD	9.62426e-06	-5.01663	0.000222935	-0.301351	4.23001	3.56495	5.75193	4.98907	4.33017	4.22007	3.99489	3.92491	3.35903	4.2194	4.53566	4.69168	4.12792	4.12792	4.12792	4.16022	2.69519	4.12224	4.21134	4.83191	4.55959	4.24851	4.42577	4.70207	4.47276	4.55391	4.16237	4.20184	4.78958	3.85324	4.32735	4.22891	4.52584	4.67151	4.57873	4.45939	4.33157	4.47654	4.36739	4.49877	3.91231	4.39521	3.85871	4.32483	5.15211
PRMT1	9.62631e-06	-5.01654	0.000222935	-0.329679	3.95709	3.98999	4.36044	4.04506	4.67643	3.98694	4.69529	4.29581	4.11575	3.8359	4.52624	4.38839	4.18536	4.18536	4.18536	3.7566	2.9061	4.81287	4.17324	4.42986	3.83835	2.82422	4.212	4.48014	3.86479	3.38309	3.94976	3.83286	4.44632	3.30389	4.07385	3.23734	3.3366	4.23856	3.97922	3.77283	3.45251	4.12303	3.89131	4.09301	3.876	3.98475	3.95992	4.00986	4.24043
RHOC	9.67871e-06	-5.01418	0.000223883	-0.347731	4.01529	3.39001	4.90829	4.66336	3.77043	4.17791	3.43839	4.39989	4.34922	3.46331	5.07291	4.25504	4.02154	4.02154	4.02154	4.1515	2.94813	3.7769	4.40307	4.19523	4.21384	4.09563	3.98812	5.27176	3.73292	3.67806	4.63166	4.35136	4.20193	2.94898	4.29375	5.37742	4.73108	3.74175	3.82618	4.23465	4.4816	4.01831	3.26445	3.21705	4.54856	3.44434	4.19556	4.80663	4.17713
GMNN	9.68904e-06	-5.01372	0.000223883	-0.380288	1.61886	1.40289	1.9087	1.3736	2.5285	1.22791	2.16894	2.11235	-0.769094	1.0185	2.00868	1.88795	2.1196	2.1196	2.1196	1.36799	1.03137	3.27622	1.81399	2.29899	1.91459	0.586704	1.93793	1.29062	1.16831	0.789996	1.43691	2.07118	1.92652	0.773596	0.92441	1.53305	1.75658	1.44501	1.08947	1.58615	1.33696	1.66109	2.18378	1.25058	1.69172	1.25718	1.35582	1.50528	1.58901
KLF17P1	9.70285e-06	-5.0131	0.00022395	0.554035	2.02545	2.69658	1.70019	2.18937	2.03478	2.41093	1.19559	0.217269	1.19449	1.47117	0.856257	1.18151	0.750773	0.750773	0.750773	2.2436	3.28635	0.971965	0.742468	1.44021	1.32983	2.49309	2.10164	1.29062	0.788166	0.96947	2.47765	1.74582	0.964004	3.06954	1.14143	2.60922	2.7182	1.20324	1.08947	1.78377	2.00442	1.49876	1.73021	1.69004	1.15054	1.27979	1.04083	1.19494	1.36675
SIK3	9.72487e-06	-5.01212	0.000224207	0.263246	7.46834	7.85309	7.40119	7.90801	7.23778	7.64576	6.63586	6.70564	7.30181	7.48333	7.07133	7.47059	6.97802	6.97802	6.97802	7.54039	7.48657	7.30642	6.8375	7.0692	6.87614	7.26902	6.91745	6.75373	7.17655	7.36603	7.24696	7.24591	7.3642	7.71266	7.76987	7.44089	7.96075	7.08752	6.87431	7.21687	7.10837	7.60859	6.98155	6.90148	7.55195	7.28387	7.47869	7.53761	7.36334
SRBD1	9.77599e-06	-5.00984	0.000225133	0.403852	5.72526	6.42547	5.45602	6.11771	5.54783	5.97128	4.84817	4.94776	5.20761	5.90376	4.93971	5.21058	5.55428	5.55428	5.55428	5.1005	6.11998	5.64497	5.23821	4.9992	5.41019	5.9211	5.2152	4.62506	5.5989	5.1363	5.44852	5.46496	5.18197	5.82463	4.60585	6.41494	6.8469	5.31903	5.1816	5.64605	5.95454	4.86185	5.83808	5.1947	5.76426	5.13599	5.06104	5.38711	5.52239
RNU5A-5P	9.88661e-06	-5.00495	0.000227425	0.609999	-0.0382386	-0.129198	-1.37255	0.654842	-1.16688	-2.03209	-2.71037	-1.46974	-0.0815063	-0.688887	-0.407843	-0.9669	-0.87181	-0.87181	-0.87181	-1.22963	-0.0288923	0.191583	-0.412175	-0.30299	-0.668387	0.791728	-1.40261	-3.50603	-0.811046	0.256548	-0.593457	0.221248	-0.845838	0.112839	-2.98414	-0.157316	1.31181	-2.05704	-1.67159	0.501542	-0.00715495	-1.54015	-1.12687	-0.473688	0.182261	0.455068	-1.51224	0.0890885	-0.684824
COL4A4	9.94255e-06	-5.0025	0.000228456	-0.592077	1.71693	0.831326	2.5017	1.05853	3.04926	1.52552	2.13537	2.83373	2.05992	0.355183	2.31617	1.39941	0.895482	0.895482	0.895482	1.4556	1.03137	0.721873	1.35089	2.25365	2.37055	0.791728	3.12086	2.63144	1.55662	0.0592382	2.47765	2.13124	1.22094	1.65322	2.13788	0.400929	1.5194	2.77551	1.28114	1.19991	1.83266	1.07779	0.204697	1.72127	1.41633	1.27979	2.41156	1.66762	0.821732
PIK3CD-AS1	9.96395e-06	-5.00157	0.000228692	0.476382	1.93111	2.1111	1.95121	1.9011	1.35474	1.50087	0.582466	0.800231	2.61829	1.68333	1.95352	2.07367	1.21526	1.21526	1.21526	2.39902	2.2871	0.500986	1.81399	1.4603	1.56004	3.33108	1.71037	0.870077	1.83913	1.97938	2.64419	1.58333	0.0182261	1.30586	0.560012	2.21697	1.5194	0.82204	0.71075	2.18433	1.77688	1.24075	1.24981	1.11607	1.0235	2.04513	0.637286	1.54761	1.3398
PKMYT1	9.99995e-06	-5	0.000229262	-0.495214	1.67847	0.740882	2.18291	1.40856	2.85236	0.92843	2.21252	2.96293	2.09058	-0.32913	1.79522	2.51979	1.07641	1.07641	1.07641	1.53819	0.596521	3.41464	2.06156	2.68785	1.65164	1.07955	1.83529	2.5094	0.338127	0.58498	2.97951	2.13124	1.92652	1.19713	1.28515	0.899231	1.64286	1.46511	1.63718	1.66847	2.25636	1.56179	1.8495	1.01888	0.48195	1.78554	0.20638	1.5266	1.82107
FOS	1.00887e-05	-4.99616	0.00023104	0.522173	7.68791	8.83836	7.67251	6.92538	7.04646	7.67154	6.31511	5.39516	7.70811	7.52659	7.29256	7.69861	6.92125	6.92125	6.92125	7.73461	8.81189	5.58407	7.01735	7.68673	7.28567	9.12121	7.34388	6.46958	6.26973	7.61614	7.68277	7.73478	6.6851	8.58191	6.63194	7.68234	8.24399	6.76825	6.49723	7.61188	8.025	7.48293	6.89752	6.36045	6.52474	7.15984	7.48315	7.12652	7.06166
AC105415.1	1.01066e-05	-4.9954	0.000231191	-0.550114	1.21008	0.370464	0.746287	2.30519	1.6048	1.19754	1.17371	0.42292	0.56803	0.625433	1.00834	1.81402	1.02699	1.02699	1.02699	2.69142	0.596521	-0.139434	2.10636	2.75446	1.67366	-0.0488636	1.54135	1.88107	0.739012	0.656605	0.566193	1.94301	1.26726	0.773596	0.864639	1.19455	2.64624	-0.168874	0.868386	1.66847	1.11497	1.18845	0.396011	1.22902	-0.467944	1.30205	0.383379	1.60886	1.65609
SRPRB	1.02281e-05	-4.99021	0.00023371	-0.354886	3.50969	3.24946	4.01454	3.10902	4.59996	3.20493	3.8333	3.42436	3.00382	3.8753	3.65853	3.53098	4.01838	4.01838	4.01838	3.26868	2.30014	4.07626	3.99015	3.95083	4.04674	2.79273	4.03807	3.98042	3.79436	3.20342	3.01643	3.58163	3.77221	2.5117	3.36904	3.02849	2.44041	3.8335	3.5518	3.31709	3.48188	3.50668	3.73631	3.82484	3.876	3.55508	3.34909	3.51862	3.22591
EGF	1.02494e-05	-4.9893	0.000233937	-0.646491	3.50848	1.21408	4.64249	4.56996	3.62365	3.32216	3.04526	3.56126	2.77753	2.2476	3.75308	4.22326	2.98121	2.98121	2.98121	4.55345	3.5383	1.83247	4.19415	4.6731	3.04683	3.28656	3.84026	4.11204	2.11434	2.7091	3.12185	4.2568	3.75064	3.6923	2.53296	2.98504	4.86073	2.11324	3.60206	3.88037	4.5104	3.08839	0.819888	3.01766	1.64069	3.07577	3.54175	4.4777	3.45037
SELP	1.02609e-05	-4.98881	0.00023394	-0.627126	5.32151	3.96023	6.32589	7.21608	5.35811	5.03708	4.61231	4.55824	4.67678	4.24301	5.41668	6.22307	4.75675	4.75675	4.75675	5.98388	5.60768	4.45816	6.07019	6.63278	4.99078	5.12233	4.93093	5.82299	3.8762	3.66075	4.47689	5.92023	5.38291	5.29353	4.36558	5.22934	6.35883	4.06179	5.19506	5.82944	5.13093	4.71936	4.09473	4.26711	3.48083	4.94054	5.48474	5.73039	5.17134
TMEM97	1.02848e-05	-4.9878	0.000234224	-0.471427	1.26442	0.693441	1.39609	1.10189	2.28973	0.0357182	2.12401	1.74172	1.54381	0.665934	1.83645	1.42447	1.53104	1.53104	1.53104	1.10445	0.509359	2.67156	1.83188	2.10841	1.3573	-0.774792	1.62064	2.19304	1.09207	0.43009	1.28379	1.78373	0.92601	0.171493	1.1664	0.0253678	0.186351	1.66945	1.25853	1.08471	0.989706	1.54108	1.3687	0.941431	1.33305	1.16302	1.41133	1.05522	1.49443
IGHV4-4	1.03696e-05	-4.98424	0.000235894	-1.41448	0.901232	1.95892	-1.37255	1.05853	4.14881	1.45025	0.479204	0.800231	0.049131	-4.34055	-1.99647	-4.34055	0.555473	0.555473	0.555473	-3.27613	-4.34055	0.0894568	-0.591347	3.46085	1.38425	-0.29724	1.38663	-0.424194	-0.319495	-2.30715	0.188828	4.01125	1.45239	-0.148998	0.737115	-2.11447	2.07429	1.38299	1.11487	1.02347	-0.144031	-4.34055	-1.57629	-3.05931	-0.259691	0.742353	-0.14755	-2.90091	1.00444
TBC1D1	1.03833e-05	-4.98366	0.000235945	0.357979	7.76287	8.42099	7.82746	7.9281	7.46891	7.72608	6.7768	6.56618	6.90671	7.80624	7.12795	7.68019	7.20399	7.20399	7.20399	8.01734	7.89364	7.24873	7.15387	7.35768	6.70896	7.93426	7.21216	6.75269	7.32186	7.52638	7.13809	7.57503	7.19705	8.03932	7.7981	7.92297	8.67465	7.14704	7.12261	7.65669	7.79949	7.5816	7.47087	7.05836	7.58439	7.40291	7.54301	7.60743	7.44859
KCNQ5-IT1	1.06e-05	-4.97469	0.000240603	-0.526029	0.558403	-0.899936	1.04995	0.0923187	1.27829	0.597337	0.161121	0.55995	0.049131	-0.590195	0.856257	0.612158	0.20174	0.20174	0.20174	0.172097	-1.0215	1.28083	0.704122	0.297763	1.08893	-0.167713	0.581549	1.75454	0.402678	1.40342	0.566193	0.689116	0.906631	-0.561643	0.802286	-0.258136	-0.536029	1.15457	0.955311	0.203224	0.618661	0.138963	0.679738	1.22902	-0.395134	0.89661	-0.14755	0.397565	1.76139
KIF2C	1.06218e-05	-4.9738	0.00024083	-0.615595	1.53812	0.740882	1.42654	0.400825	2.86112	0.343685	2.47657	2.44284	2.31492	-0.251646	1.89618	2.00887	1.32156	1.32156	1.32156	1.64144	0.934317	3.8134	1.74011	2.09562	1.18404	-0.439553	1.98663	1.96918	0.199655	0.345927	2.32903	2.00852	1.87759	0.810973	0.358086	0.851638	1.34855	1.61653	1.61954	1.78377	1.14466	1.43284	1.8495	1.4124	-0.711413	1.13849	0.541017	1.46167	1.41918
LGALS8	1.06345e-05	-4.97328	0.000240853	0.395506	7.42091	7.88016	7.33501	8.45537	6.66624	7.24854	6.49076	6.23116	7.58564	7.37069	7.09594	7.09719	6.98814	6.98814	6.98814	7.03757	7.58643	7.22145	6.99915	6.72547	6.70762	8.07587	6.59165	6.20053	7.10258	7.50834	6.93772	7.37959	6.84604	6.648	6.42379	8.04138	7.81495	6.64209	6.56272	7.7334	7.2176	6.68761	6.79138	6.64121	7.12597	7.59771	6.41348	7.29751	6.93346
LINC00528	1.07149e-05	-4.97001	0.000242407	-0.336165	4.78277	4.85659	5.2501	5.2972	5.24381	5.07307	4.99577	3.20506	5.8265	4.35872	5.43358	5.06478	4.76619	4.76619	4.76619	4.73366	4.61568	3.98676	5.08996	5.14599	5.15435	4.55099	5.68522	4.88119	4.85659	4.53503	5.54855	5.42653	3.76953	4.59092	3.92451	5.42901	5.38313	4.54269	4.70535	5.18985	5.12536	4.23685	5.14022	4.66258	3.94423	4.69559	3.9222	5.61445	4.85658
IRF8	1.07836e-05	-4.96724	0.000243692	0.321743	5.3996	5.76933	5.32677	5.06223	5.04664	5.46439	5.57999	5.294	4.89227	5.69822	5.06209	4.55652	5.6765	5.6765	5.6765	5.02852	5.44399	5.15538	4.69713	4.74857	4.91424	4.81665	4.65399	4.85059	5.72259	4.70936	4.64351	4.90752	5.79752	4.65142	5.15362	4.46862	3.89768	5.22934	5.13116	4.86492	4.82197	5.19078	4.40683	5.35012	5.9712	5.33129	5.63221	5.54824	5.43914
PRMT2	1.08961e-05	-4.96273	0.000245965	0.220398	6.66461	6.90443	6.65006	7.03779	6.24789	6.48888	6.33497	6.02761	6.42389	6.54439	6.34618	6.81099	6.28649	6.28649	6.28649	6.55117	6.51276	6.39414	6.25644	6.43881	6.01252	7.06259	6.47007	6.20356	6.17358	6.90959	6.10041	6.3432	6.12916	6.60342	6.58236	6.75682	6.83966	6.51231	6.55056	6.80626	6.30446	6.80353	6.86705	5.98443	6.52005	6.81992	6.20349	6.73431	6.0958
AP002365.1	1.09553e-05	-4.96037	0.00024703	0.50759	-0.123047	-0.518506	-1.00436	-0.191909	-0.249123	-0.655663	-0.91039	0.102291	-1.65257	-0.909173	-0.614575	-0.9669	-0.149546	-0.149546	-0.149546	-1.22963	-0.0956537	-1.46775	-0.795968	-1.21771	-1.78109	-0.0488636	0.263585	-1.82969	-0.671591	-0.599106	0.00507972	-0.568039	-0.446448	0.171493	-0.967205	-0.258136	0.0140993	-0.108229	-0.612542	-0.0365812	-0.37728	-0.166887	-0.0767838	0.361739	-3.00918	-0.313844	-0.996625	-0.549365	-0.0646613
H1-4	1.09902e-05	-4.959	0.000247288	-0.355087	5.35942	5.04556	6.19823	4.95696	6.02524	5.46598	5.97186	4.81713	6.06328	5.10415	5.81248	5.90139	5.62242	5.62242	5.62242	4.95275	4.78064	6.41144	5.41481	6.1998	5.81617	4.55099	5.49106	6.16677	5.64466	4.71356	4.86212	5.59193	5.77299	4.26704	4.96371	4.59322	5.19168	5.45587	5.21281	5.06623	5.04892	5.45709	5.20237	5.5017	4.88275	4.92807	5.26504	5.16208	5.40379
LILRA2	1.09908e-05	-4.95897	0.000247288	0.354517	8.10668	9.06729	7.86164	7.72687	8.00749	8.20579	6.90311	6.37432	7.89777	8.3944	7.4315	7.76511	7.92222	7.92222	7.92222	8.5196	8.73113	6.97569	7.754	8.00881	6.57717	8.60193	7.70343	6.90845	7.35282	8.05019	8.10178	8.44277	7.19555	8.58056	7.63606	8.31252	8.44477	7.56874	7.3337	8.46196	8.38765	8.14516	7.6444	7.163	7.91929	7.94714	7.91719	7.94614	7.63471
RNU4-38P	1.10349e-05	-4.95723	0.000248008	0.645319	-0.504207	-0.0463239	-1.00436	-0.546222	-1.03096	-0.771032	-2.41682	-3.41295	-0.0815063	-1.16926	-2.31977	-1.25444	-1.74705	-1.74705	-1.74705	-1.42446	-0.165655	-2.58702	-1.89553	-2.61228	-0.462253	-0.167713	-1.40261	-2.98073	-2.16556	-0.599106	-0.925651	-1.14798	-1.30658	-0.469132	-1.8343	-0.611322	0.665482	-0.978129	-0.381909	-0.585479	-0.655652	-1.72843	-1.76372	-2.68716	-3.00918	-1.22794	-0.858901	-0.959418	-2.05729
MKI67	1.10751e-05	-4.95565	0.000248639	-0.617056	5.28757	4.1523	5.99608	5.47055	6.77284	4.69519	5.43	5.18873	5.02122	3.54701	5.07937	5.95934	5.31533	5.31533	5.31533	5.22831	3.32515	7.91953	5.0408	5.80043	4.34654	3.95338	4.72926	5.19618	4.23199	4.14456	5.24578	6.06004	6.1612	4.57471	5.28767	4.92466	5.3518	4.87297	5.05939	5.04713	5.00103	5.26684	5.66651	4.19386	3.76123	5.03992	4.4976	5.0358	5.44389
CTSG	1.11325e-05	-4.95341	0.000249655	-1.0766	0.861122	-1.05335	-1.17674	-1.01691	-0.408508	-1.03378	0.769154	0.102291	-1.65257	-2.86564	-0.730228	1.56633	-0.267914	-0.267914	-0.267914	0.735837	0.0349158	1.55439	2.47991	-0.689037	0.0225843	-1.49355	-0.716755	2.89406	-1.5624	-1.21387	1.06627	0.977857	-1.21883	2.20978	1.96366	1.03326	-0.0804082	-1.65887	-0.612542	0.857912	-0.655652	0.957927	-0.889987	-1.08009	-2.32876	-0.0656384	-3.32829	-1.72288	0.51948
FBXL13	1.11862e-05	-4.95132	0.000250585	-0.585121	5.07637	4.90426	5.58142	5.32033	5.59849	5.46279	4.33515	2.11235	5.66778	4.86636	5.63397	5.45821	4.06809	4.06809	4.06809	5.90567	4.9412	3.24687	6.12019	5.19028	5.0551	5.90646	6.2257	4.50982	3.68181	4.5159	6.00718	6.0639	3.21764	5.15323	4.7093	5.41679	6.6055	5.38907	5.3081	6.09989	6.63244	4.36314	4.25149	5.09987	3.07594	6.22001	3.54175	5.78006	5.67169
CSF3R	1.11993e-05	-4.95081	0.000250605	0.506497	12.4407	13.1699	12.2693	13.1927	11.6805	11.8942	11.0383	9.15209	12.8515	11.8973	11.9301	12.5846	11.372	11.372	11.372	12.5078	12.9743	10.6982	11.8117	12.0231	11.349	13.4893	11.8477	10.7719	11.3922	12.6012	12.3936	12.3295	10.6214	13.2476	11.5357	13.0591	13.0516	11.1871	11.1163	12.8573	12.3736	11.9112	11.9817	10.7549	11.1623	12.32	11.6813	12.3775	11.8486
HYAL3	1.12741e-05	-4.94792	0.000252005	-0.437139	1.41503	-0.217125	2.33513	1.99609	1.08235	0.92843	0.582466	1.21427	1.0143	1.35211	1.04398	1.21061	1.61705	1.61705	1.61705	1.93359	1.03137	0.419144	2.01533	2.13365	1.48731	0.162967	0.868166	2.40796	1.30968	0.509613	1.28379	1.4244	1.46569	0.917625	2.3046	0.0253678	1.45347	1.1042	0.868386	0.74862	0.700897	2.01651	1.12023	0.512163	1.64069	0.455068	1.893	1.58873	0.969701
FANCI	1.13084e-05	-4.9466	0.000252496	-0.367006	3.53542	2.64764	3.76931	2.80236	4.23561	2.79246	3.62332	4.00311	3.0822	3.26666	3.32358	3.07313	3.61634	3.61634	3.61634	3.19422	2.68529	5.57936	3.75249	3.94371	3.24366	2.58786	3.38435	3.82381	3.46467	3.5238	3.63057	3.77757	4.3776	3.12253	3.78638	3.14165	3.24213	3.60807	3.67644	3.49682	3.40423	3.67769	4.10162	3.22251	3.31713	3.38822	3.47166	3.15098	3.69328
STARD5	1.1338e-05	-4.94547	0.000252749	-0.364096	1.67522	1.51629	2.3825	1.63205	2.51745	1.06925	2.23383	2.14176	1.49879	1.83311	1.61738	1.18151	1.8901	1.8901	1.8901	1.51118	0.718122	1.64718	1.93482	1.91812	1.65164	1.2745	2.12359	2.05221	1.74268	1.27275	1.60795	2.10152	1.87759	1.10984	0.864639	1.03326	1.02454	2.06138	1.52798	1.56482	1.02206	1.26621	1.52022	1.33376	1.69172	1.08813	1.98734	1.8813	1.58901
BEX3	1.13443e-05	-4.94522	0.000252749	-0.629765	2.91015	0.957175	3.42173	4.34935	2.4838	2.62001	2.60476	2.69181	1.19449	2.07788	2.67556	3.55387	2.21095	2.21095	2.21095	4.28505	2.49422	1.59223	3.6042	3.96145	2.21408	2.00881	2.91608	4.05949	1.7674	1.27275	2.40525	3.43447	2.6809	2.5117	2.73841	2.30795	4.21368	2.04812	2.6606	3.13364	2.97087	2.64008	1.94444	2.51043	1.24468	1.96368	3.02357	3.82862	2.74058
TRIM22	1.14062e-05	-4.94286	0.000253853	0.564148	10.1624	11.1044	9.88875	10.4146	9.23258	10.297	9.38582	8.65007	10.0389	10.0686	9.63034	9.4546	9.9946	9.9946	9.9946	8.51854	10.7652	9.87293	9.59434	8.89019	9.65194	10.8739	9.66942	7.98744	10.2089	9.44133	9.82645	10.3206	9.28388	9.08329	7.35986	11.1506	11.2779	9.69097	9.20963	10.2959	10.2677	7.69109	10.1247	9.59771	10.2562	9.92882	7.05673	9.83767	9.79342
UBA5	1.1478e-05	-4.94013	0.000255174	-0.368462	3.42203	3.1387	3.56549	2.7351	4.27221	3.52531	3.94409	3.55581	2.86881	3.63124	3.77975	3.38541	4.04965	4.04965	4.04965	2.80698	2.65515	4.32123	3.54577	3.19312	3.71106	2.18891	3.71578	3.55151	3.84169	3.40405	3.15534	3.40436	3.9245	2.6928	3.55069	3.00693	2.25931	4.04186	3.91921	3.2585	2.97087	3.56426	3.81379	4.04445	3.6919	3.58716	3.59066	3.23108	3.43771
THEMIS2	1.15095e-05	-4.93895	0.000255597	0.378583	9.00388	9.73544	8.80157	9.69732	8.48084	9.07017	8.02719	7.42972	9.09721	8.5978	8.63856	8.94053	8.34435	8.34435	8.34435	9.17959	9.40456	8.01316	8.21393	8.74685	7.68137	9.54819	8.23714	7.9403	8.14775	9.22866	9.03873	8.97301	7.98346	9.36561	8.75049	9.22654	9.64429	8.39185	8.08167	9.13165	8.83078	9.15102	8.44621	8.06172	8.76013	8.64361	8.60775	9.0976	8.51182
AC012645.1	1.15221e-05	-4.93847	0.000255602	0.7611	2.17277	2.41883	0.229211	2.76238	0.820048	0.501159	0.161121	0.102291	0.652664	1.60217	0.0781061	0.889174	1.36198	1.36198	1.36198	2.65487	1.59412	0.240058	0.082255	2.45734	1.89598	2.32719	0.182287	1.01512	0.523713	2.60432	2.00084	0.72853	0.945132	4.10345	3.25144	0.527476	2.17999	1.46511	0.897946	0.501542	1.02206	2.96167	2.60784	-0.275732	2.28602	0.709419	3.37724	-0.0940245	1.46978
LOXL3	1.161e-05	-4.93517	0.000257274	0.339996	3.67859	3.44117	3.45904	4.2225	3.28894	3.70335	3.07508	3.56669	3.06686	3.67158	3.14637	2.82283	3.40532	3.40532	3.40532	3.42879	3.57632	3.33877	3.46207	3.94728	2.78888	2.98608	2.36376	3.81591	2.86395	2.9562	3.01643	4.03109	4.04017	4.00609	3.63361	2.95157	3.87267	2.823	3.05106	2.96473	2.82263	3.8726	2.48688	2.63864	3.9823	2.82983	4.20737	3.55019	3.59413
AMY2B	1.17423e-05	-4.93025	0.000259924	0.238005	3.46097	3.4975	3.00387	3.44832	3.35247	3.15839	3.05726	2.2936	3.63345	3.64143	2.77435	2.72536	3.28434	3.28434	3.28434	3.15985	3.587	3.26455	3.06061	2.45734	3.39712	3.53512	2.97158	2.94565	3.68181	4.02786	3.26169	3.38599	2.90741	4.01012	3.06485	3.62477	3.63312	3.29098	3.49006	3.09695	3.11281	3.41861	3.92274	3.57852	3.037	3.26897	3.57251	3.39075	3.45037
PARVG	1.1911e-05	-4.92405	0.000263375	0.211915	7.79573	8.52733	7.55984	8.19503	7.61531	7.82592	7.36803	6.86953	7.45916	7.57989	7.27392	7.84791	7.54384	7.54384	7.54384	7.78269	7.55175	7.36906	7.39525	7.63298	7.34691	7.94235	7.26247	7.5809	7.52898	7.69586	7.36141	7.76826	7.57472	7.85002	8.02173	7.58837	7.75847	7.4074	7.36116	7.53579	7.57497	8.04369	7.53361	7.24519	7.78204	7.67651	8.02093	7.7132	7.5753
PAICS	1.19673e-05	-4.92201	0.000264285	-0.394058	4.24407	3.77324	4.21101	4.03949	5.40681	3.90944	4.66228	4.64809	3.84607	3.96323	4.27574	4.25504	4.47748	4.47748	4.47748	3.59879	3.02084	6.05711	4.84323	4.81054	4.48373	2.9293	4.72209	4.73805	4.01688	3.30722	3.75231	4.54593	4.77094	3.28409	4.13521	3.91837	3.91002	4.39601	4.17	3.94785	3.63615	4.34534	4.69774	4.45764	4.41827	4.43353	4.0675	4.31873	4.42484
EPOP	1.19779e-05	-4.92162	0.000264285	-0.530273	0.298927	-0.31076	-0.165717	0.175847	0.499213	-0.18654	1.27994	2.26716	1.99657	0.198349	0.730657	0.0926117	0.329533	0.329533	0.329533	0.365464	0.154643	1.55439	0.742468	0.848114	0.536715	-0.439553	0.944114	0.70881	1.01157	-0.441216	1.67106	0.474065	0.188364	-0.660496	-0.587399	1.15589	-0.407942	0.430623	0.775885	0.545773	0.660365	-1.37363	1.49953	-0.546208	-0.259691	-0.18441	-0.733186	0.251556	0.197963
CD101	1.2105e-05	-4.91704	0.000266803	0.513287	3.91382	4.04772	3.2365	2.63535	3.65422	3.18958	3.43839	4.4798	3.43268	4.90283	2.87673	2.83222	4.42836	4.42836	4.42836	3.36234	3.85789	4.81087	2.7671	2.77065	2.72705	2.53175	1.90029	3.00938	4.33068	3.57091	3.16634	2.75439	4.3776	2.85369	3.51712	2.59484	1.58245	3.50992	3.41537	3.27173	3.34792	4.11605	3.10233	3.46319	3.95819	3.13897	3.36323	3.1849	3.62794
DLEU2	1.2162e-05	-4.915	0.000267772	0.345537	7.51073	7.95907	6.98341	7.92433	7.16886	7.56741	6.30885	6.27246	7.42121	7.0457	6.70737	7.12851	7.05014	7.05014	7.05014	7.3444	7.86073	6.9886	6.55464	6.96537	6.88206	7.75135	6.89411	5.97082	7.15797	7.79789	7.26944	7.7815	7.27563	8.09294	7.42403	7.78092	8.1515	6.67751	6.86919	7.44675	7.4542	7.26703	7.184	6.42055	7.15808	7.43379	7.39079	7.36008	7.35579
EME1	1.22092e-05	-4.91331	0.000268523	-0.549073	-0.103052	-1.05335	-0.85039	-0.842386	0.820048	-0.896434	0.367978	1.09904	0.880319	-1.6763	-0.144504	0.153835	-0.330951	-0.330951	-0.330951	-0.523337	-0.239227	1.34872	-0.179288	1.17433	-0.908962	-1.21229	0.340546	0.1787	-1.13835	-0.978629	1.24283	0.378187	-0.174693	-0.660496	-0.587399	-0.157316	-0.290306	-0.367794	-0.531498	-0.684198	-0.876407	0.245196	0.396011	0.476002	-0.196457	-0.0656384	-0.858901	-0.303805	-0.385974
MTSS1	1.22568e-05	-4.91162	0.000269282	0.364223	6.24899	6.32204	6.60501	5.31574	5.57071	6.36882	5.87008	6.34932	5.57595	6.67415	5.8595	5.44449	6.05569	6.05569	6.05569	5.87819	6.42245	5.74178	5.51512	5.33605	6.12667	6.15265	5.38378	6.28163	6.48905	5.85797	5.45302	5.01503	6.61556	5.23629	6.67173	4.63599	5.01725	6.06519	6.24098	5.35587	5.95349	6.07115	5.31622	6.3654	7.75929	5.61974	6.45204	6.17634	6.37253
B3GNT9	1.2469e-05	-4.90417	0.000273651	-0.298114	2.31815	2.6845	2.10974	2.94013	2.83467	2.57347	2.12401	2.48934	2.85101	1.95252	2.68688	2.8692	1.71393	1.71393	1.71393	2.45678	2.07583	2.40013	2.68087	2.86411	2.48704	1.31938	2.47034	2.76051	1.9938	2.32543	2.73561	2.87345	1.94564	2.23749	2.28193	2.73258	2.91475	2.17555	2.33285	2.79187	2.20091	2.33791	2.47633	2.15778	1.19838	2.24221	2.22277	2.54586	2.41874
AC092999.1	1.26443e-05	-4.8981	0.000277204	0.568223	1.61791	0.996797	0.969512	1.22465	0.499213	1.64286	0.367978	0.800231	0.732608	1.40092	-0.730228	0.815302	1.27998	1.27998	1.27998	1.06784	2.4125	0.615653	1.07852	1.48012	0.437253	2.45337	1.58944	-0.424194	1.43843	1.07781	2.69062	2.31076	1.01918	2.16717	0.737115	2.01576	2.1175	0.470933	1.52798	1.82024	2.17237	0.523738	1.3687	0.648373	1.31146	1.75359	1.5661	0.799024	1.72019
NUF2	1.26847e-05	-4.89672	0.000277793	-0.526276	0.398829	-1.41995	-1.17674	-0.418203	0.924079	-0.268947	1.25931	1.88774	0.168915	-0.590195	1.17834	0.737443	0.750773	0.750773	0.750773	0.424559	-0.239227	1.8482	0.664728	0.878299	1.3573	0.0609361	0.182287	0.638893	0.338127	-0.298914	1.47278	1.0102	0.311359	0.655276	0.221803	0.80242	0.544027	0.346458	0.807382	0.146905	0.38988	-0.10031	0.524494	0.54744	-1.68349	0.569606	-0.230091	-0.739872	0.256774
RNFT2	1.27209e-05	-4.89548	0.000278288	-0.412037	1.57851	1.43208	0.793781	1.10189	2.59305	2.11852	2.42193	2.70172	1.13689	0.625433	2.0618	1.69548	1.23716	1.23716	1.23716	1.36799	1.55112	2.1693	1.79587	2.12108	1.38425	0.258256	2.38208	2.16844	1.20498	1.12907	2.44191	1.4244	1.41173	1.4784	2.42329	1.2689	0.340214	1.70368	1.89346	1.11438	1.43633	1.75399	2.27184	1.97553	0.969376	1.44895	1.32724	1.60886	1.1039
RAD51	1.2754e-05	-4.89435	0.000278715	-0.556051	0.461488	-1.91265	0.839761	-1.21548	0.820048	-0.548841	1.30028	2.06707	-0.0815063	-0.909173	0.686237	1.02646	0.408844	0.408844	0.408844	0.239474	0.265191	2.54222	1.07852	1.29112	0.0225843	-0.97702	0.643609	1.24429	0.199655	-0.169397	1.87246	1.07279	0.579558	-0.469132	0.358086	-0.611322	-0.536029	0.389154	0.374645	-0.173303	0.778698	0.34414	1.29854	0.193785	-1.68349	0.0440947	-0.733186	0.199407	0.566733
AC012645.4	1.28547e-05	-4.89094	0.000280617	0.808213	0.899503	1.40289	-0.0776089	2.06343	-0.408508	-0.449386	-0.819805	0.0411728	-2.84757	0.496627	-0.507509	-0.620872	0.288181	0.288181	0.288181	1.14014	0.210975	-0.411615	-2.1527	0.425909	-0.281924	0.258256	-0.2538	-0.0332443	0.523713	1.56105	-0.32362	-0.155518	-0.216577	3.03836	1.96366	-0.611322	0.881446	0.210222	0.287986	-0.904551	-0.217669	1.73588	1.71233	-1.08009	1.04982	-2.0701	1.66077	-2.90091	0.782241
PSPH	1.30097e-05	-4.88573	0.000283701	-0.306783	1.72746	1.64656	1.97201	1.33778	1.88814	2.16634	1.96747	2.38252	2.02859	1.68333	1.79522	1.94102	1.56606	1.56606	1.56606	2.1239	1.63587	1.78425	1.98366	2.04329	1.79915	1.52498	2.04528	1.75454	1.9727	0.852335	1.54194	2.24433	2.11562	1.22509	1.49681	1.47141	1.06925	1.97993	2.05962	1.64833	2.09844	1.45515	2.04784	2.12312	1.26729	2.01849	1.51634	1.62872	1.61172
HERC5	1.31397e-05	-4.88141	0.000286232	0.915079	8.66234	8.87537	8.96187	7.05237	6.27602	9.29398	6.8197	6.23543	8.45896	9.19918	7.90232	6.18325	8.1378	8.1378	8.1378	4.41459	9.48011	8.02769	8.17743	5.62685	7.82078	9.25141	8.10621	5.44052	8.84143	6.7682	8.22717	8.36655	6.85964	5.77229	3.92085	9.82563	8.89537	8.11574	7.35684	8.24458	8.903	4.44345	8.19184	8.13021	9.34129	7.83925	3.8637	7.67642	8.33951
CENPF	1.32532e-05	-4.87768	0.000288398	-0.51524	2.5043	1.2798	2.9629	2.34182	3.7797	1.94659	3.08684	3.74016	2.57557	0.625433	2.4682	2.94043	2.24377	2.24377	2.24377	2.3234	1.41387	4.79878	2.71019	3.06118	2.03855	2.1397	2.33583	2.86373	1.69192	1.56105	3.19883	2.86464	2.98799	2.15269	2.35976	2.55081	2.31607	2.02123	2.31104	2.18433	2.36123	2.46427	2.71046	2.15778	1.12601	2.13468	2.0759	2.03798	2.41874
UPF1	1.33042e-05	-4.87601	0.000289202	0.311536	7.02203	7.82448	7.15973	7.34798	6.85245	7.29365	6.32135	6.20962	7.43398	6.96076	6.74845	7.23283	6.46468	6.46468	6.46468	6.90896	7.46175	6.59851	6.0683	6.75576	6.02649	6.6932	6.19623	6.0051	6.13254	6.81102	6.7568	7.03171	6.67869	7.66816	7.05435	7.12533	7.62399	6.57952	6.62757	7.02954	7.1451	6.92738	6.71208	6.30999	6.56008	6.99966	6.95532	7.16102	6.45489
ALG14	1.33273e-05	-4.87526	0.000289397	-0.311573	1.70322	0.308835	1.48558	1.54047	2.50632	1.16652	2.05386	2.05166	1.13689	0.781031	2.00868	1.88795	2.14299	2.14299	2.14299	1.33756	1.41387	1.89436	2.04631	2.05655	2.12099	1.40517	1.73908	2.46968	2.07527	1.6689	1.78956	2.20295	1.79569	1.50144	1.55469	1.43957	0.978403	1.70368	1.86381	1.08471	1.02206	1.85811	1.54063	1.94939	1.96497	1.42886	1.96896	1.91403	1.80145
PTPN6	1.35714e-05	-4.86738	0.000294328	0.291567	8.81777	9.51343	8.95274	9.68613	8.75658	8.8554	8.07242	7.64432	9.23526	8.67347	8.63107	8.90062	8.32131	8.32131	8.32131	9.05144	8.93328	8.2818	8.17239	8.71284	7.8785	9.1597	8.19632	7.93211	8.23177	8.8039	8.60189	8.89923	8.31429	8.83789	8.45566	8.88435	9.42142	8.20003	8.14236	8.90807	8.82391	8.64389	8.31002	7.88963	8.62005	8.62896	8.42744	8.89105	8.29811
C14orf93	1.3583e-05	-4.867	0.000294328	0.316696	3.94417	4.38661	3.42173	3.99993	3.73749	4.24626	3.42456	3.0966	4.78386	3.90943	3.83165	3.56518	3.35614	3.35614	3.35614	3.23606	4.31839	3.58851	3.46781	3.15046	3.55373	4.04976	3.71217	3.00938	3.94825	3.83295	4.10066	3.76814	3.26025	4.42907	3.07148	4.6395	4.43908	3.82575	3.58399	3.7541	3.87185	3.30037	4.04561	3.49516	3.73309	3.60964	3.42522	4.02866	3.69328
AC106865.1	1.36173e-05	-4.86591	0.00029476	0.827251	1.83028	2.0559	0.646334	3.28862	0.746277	2.22773	2.1909	0.685087	1.82482	1.42472	0.971793	-0.842106	1.17045	1.17045	1.17045	0.172097	1.69631	-2.03223	0.664728	0.720632	0.583988	1.18031	1.98663	0.406176	0.881719	0.509613	0.865037	1.32504	0.311359	1.38234	0.737115	4.43672	1.06925	1.34011	-0.312556	1.22733	1.14466	0.193057	-0.206797	1.89565	1.26729	0.455068	-0.317643	1.27271	0.197963
RNVU1-4	1.36403e-05	-4.86518	0.000294945	0.454543	-0.00765253	0.593606	-1.17674	0.0923187	-0.792379	0.166893	-0.505476	-0.233036	-4.34055	-0.0414162	-0.614575	0.269	-1.07265	-1.07265	-1.07265	0.0270995	0.596521	0.0894568	-0.498981	-1.66299	-0.783666	-0.97702	-0.796922	-0.759719	-0.427586	0.161263	-0.0963874	-0.38865	-0.604294	-0.22262	-0.157447	0.187498	0.411399	-0.108229	-0.381909	-0.103323	-0.655652	-0.166887	0.716073	-0.703193	-1.11708	-0.613812	-0.410854	-0.160619	-0.684824
[truncated: 5,481 more rows]
[truncated: 117 more columns]
