# Supplementary material for: Distinct immune responses in patients infected with influenza or SARS-CoV-2, and in COVID-19 survivors, characterised by transcriptomic and cellular abundance differences in blood
Source: medRxiv preprint, doi:10.1101/2021.05.12.21257086, version 1 (2021-05-15)
Supplement: Additional file 3: Gene pathways identified by TopMD topological analysis between patients with COVID-19 or influenza. [file 257086_file05.xlsx]

## Sheet: Sheet1
1st TOP pathway, peak marker UBA52	UBA52	RPS12	UBQLN3	RPL21	HERC3	RPL28	ZFAND3	HECTD3	USP9X	RPL11	LONRF1	RPS27	OTUD7A	RPL30	RPL12	RPL38	RPL34	SH3D21	ZFYVE19	RPS25	USP35	RPL39	RPS14	ZFAND5	EEF2	ZFAND4	RPS9	FAU	RPL35A	RPS11	ZFAND6	RNF139	RPL32	RPL24	RPL7	RPLP2	RPS17	RPS20	RPL31	RPS24	RPS10	RPL27A	RPS15	RPL37	RPL18A	RPS29	RPS13	RPL19	RPLP1
Fold Change in COVID v Flu	-0.192883	-0.187111	-0.139209	-0.137446	-0.135157	-0.0760823	-0.075711	-0.0704004	-0.0555724	-0.0431798	-0.0368007	-0.0367026	-0.034583	-0.0255145	-0.0252377	-0.0142669	-0.0124707	-0.0112894	-0.00671688	-0.00411048	-0.00170429	0.000710326	0.00426639	0.00523524	0.00564411	0.00795488	0.00870539	0.010568	0.0146389	0.0152686	0.0174888	0.0200753	0.0244616	0.0301699	0.0309517	0.0314914	0.0317479	0.038456	0.0385943	0.0401103	0.0446208	0.0446904	0.0504892	0.0563319	0.0608627	0.0614324	0.0619779	0.0629588	0.0659016
GO Term	Cytoplasmic Ribosomal Proteins WP477	Translation Factors WP107	Insulin signalling in human adipocytes (normal condition) WP3634	Insulin signalling in human adipocytes (diabetic condition) WP3635	Follicle Stimulating Hormone (FSH) signaling pathway WP2035
Adjusted P-Value	1.54866e-146	7.90214e-07	0.146538	0.183172	0.220636
P-Value	2.27744e-148	2.32416e-08	0.0107749	0.0107749	0.00973392
2nd TOP pathway, peak marker NDUFAB1	NDUFAB1	NDUFB3	NDUFA5	TMEM14B	NDUFS3	NDUFC2	NDUFA9	NDUFA11	NDUFB6	NDUFB5	NDUFB10	NDUFB8	NDUFS4	OXSM	NDUFA6	NDUFA2	NDUFC1	NDUFA7	NDUFA12	NDUFA8	NDUFV2	NDUFS7	NDUFB9	NDUFS8	LYRM2	NDUFB7	NDUFS6	NDUFS5	NDUFB1	MT-ND1	NDUFS2	NDUFV3	NDUFS1	NDUFA13	NDUFV1	NDUFB4	NDUFA10	DNAJC30	SLC26A2	NDUFA3	MT-ND4	FOXRED1	NDUFA1	NDUFB2	ROMO1	MTCH2	MT-ATP6	MT-CO3
Fold Change in COVID v Flu	0.123245	-0.115648	0.00228944	0.00355613	0.0220585	0.0225654	0.0260301	0.0276305	0.029142	0.0369777	0.0434591	0.043466	0.0445787	0.0463127	0.0498583	0.0513005	0.053689	0.0553061	0.0583774	0.0632751	0.071605	0.0732702	0.0836616	0.0839939	0.0855796	0.0966414	0.10229	0.110665	-0.0352055	-0.0237669	-0.0225825	-0.0079481	0.0147071	0.0196353	0.0307128	0.0318248	0.0398098	0.0434868	0.0476944	0.0549078	0.0592238	0.0596604	0.0596704	0.0738922	0.0749631	0.0767578	0.0377912	0.0304351
GO Term	Mitochondrial complex I assembly model OXPHOS system WP4324	Oxidative phosphorylation WP623	Electron Transport Chain (OXPHOS system in mitochondria) WP111	Nonalcoholic fatty liver disease WP4396	Nucleotide-binding Oligomerization Domain (NOD) pathway WP1433
Adjusted P-Value	2.80655e-66	5.37886e-65	4.44495e-63	6.31115e-54	0.460021
P-Value	3.50819e-67	1.34471e-65	1.66686e-63	3.15557e-54	0.287513
3rd TOP pathway, peak marker PSMD14	PSMD14	ECPAS	PSMD4	PSMD10	PSMA3	PSMB3	PSMC1	PSMA6	PSMA4	PSMA1	PSMD13	PSMA2	ADRM1	PSMD2	PSMD6	PSMB7	PSMC6	PSMD12	PSMD3	PSMB1	PSMA7	PSMD7	PSMA5	TXNL1	PSMD11	PSMB4	PSMC4	PSMC3	PSMC2	PSMC5	PSMB2	PSMB5	PSMD1	PSMB6	USP14	UBLCP1	TP53I11	TXNDC17	PSME3	PSMD9	POMP	ANKRD42	IGSF9	NOL7
Fold Change in COVID v Flu	0.158489	-0.0356229	-0.0147303	-0.0139078	-0.0114762	-0.00873241	-0.00382649	-0.00327531	-0.00242114	-0.00179026	0.0122414	0.0203551	0.0215229	0.0240698	0.0254126	0.0367752	0.0401712	0.0403682	0.042195	0.0427391	0.0457959	0.0488928	0.04907	0.0491879	0.0497168	0.050128	0.0501584	0.0503557	0.0546326	0.0590206	0.0639074	0.0639077	0.0883703	0.122407	0.123734	-0.0244684	-0.0177274	-0.0143745	0.00849849	0.0182183	0.0217654	0.0222648	-0.00817157	0.00202957
GO Term	Proteasome Degradation WP183	Parkin-Ubiquitin Proteasomal System pathway WP2359	Ciliary landscape WP4352	Pregnane X Receptor pathway WP2876	Exercise-induced Circadian Regulation WP410
Adjusted P-Value	1.46074e-64	8.19687e-27	0.0265892	0.201843	0.363244
P-Value	2.08677e-65	2.34196e-27	0.0113954	0.115339	0.25946
4th TOP pathway, peak marker POLR2L	POLR2L	POLR2A	POLR2C	POLR2J	POLR1D	POLR2G	POLR2E	POLR2B	POLR2J3	POLR2J2	INTS6	POLR1B	POLR2F	POLR2I	POLR2H	POLR2D	POLR2K	POLR1C	GTF2F1	TCEANC	TCEANC2	GTF2E1	POLR3C	GTF2F2	GTF2B	SETD2	SUPT5H	SUPT4H1	ERCC6L2	ZNRD1	SSU72	INTS1	CD3EAP	SPOCD1	POLR3D	TCEA1	POLR3B	CRCP	ZMAT1	CBWD1	CFAP20	POLR3A	ZKSCAN2	GTF2E2
Fold Change in COVID v Flu	0.124538	-0.100479	-0.0395604	-0.0239357	-0.0204179	-0.00200409	0.00947926	0.0221575	0.0230965	0.0273893	0.0322607	0.0325076	0.0479867	0.0626357	0.0795676	0.0814597	0.0938426	0.101702	-0.0881346	-0.061182	-0.060627	-0.0553068	-0.0393968	-0.0305567	-0.0293159	-0.0279739	-0.0267207	-0.0238354	-0.0151015	-0.00694946	0.00975467	0.0129158	0.0383425	0.063062	0.0644461	0.0922753	0.0935797	-0.0773285	-0.0670954	0.00184631	0.0227918	0.0346115	0.0430601	0.0449247
GO Term	Eukaryotic Transcription Initiation WP405	Pyrimidine metabolism WP4022	Initiation of transcription and translation elongation at the HIV-1 LTR WP3414	Type 2 papillary renal cell carcinoma WP4241	Histone Modifications WP2369
Adjusted P-Value	1.37803e-33	1.25443e-31	0.0477609	0.359731	0.374225
P-Value	1.37803e-34	2.50885e-32	0.0143283	0.179866	0.224535
5th TOP pathway, peak marker CDC6	CDC6	CCNL1	ORC3	ORC4	MCMDC2	ORC2	ORC5	MCM5	MCM3	MCM8	ORC6	MCM6	MCM4	CDC45	CDT1	MCM10	LRWD1	MCM9	MCMBP	MAPRE2	RPA1	DTD1	DBF4	CDC7	GMNN	SMARCAL1
Fold Change in COVID v Flu	0.312666	-0.00566033	0.00295165	0.0381817	0.0572129	0.0603251	0.0671188	0.0868835	0.087984	0.100072	0.178398	0.214122	0.234173	0.257867	0.26399	0.308747	-0.0530224	-0.0404546	-0.00177791	0.00813715	0.0179844	0.0785141	0.121483	0.16897	0.172945	-0.0144078
GO Term	DNA Replication WP466	Cell Cycle WP179	G1 to S cell cycle control WP45	Retinoblastoma Gene in Cancer WP2446	Ciliary landscape WP4352
Adjusted P-Value	7.96068e-33	5.24436e-16	7.15929e-16	1.29286e-07	2.61177e-06
P-Value	6.6339e-34	8.74061e-17	1.78982e-16	4.30954e-08	1.08824e-06
6th TOP pathway, peak marker CDC20	CDC20	UBC	MAD2L1BP	CDC27	UBE2S	PRR11	NDC80	ANAPC16	CDC26	ANAPC4	TRIM33	MAD1L1	ANAPC2	ANAPC7	SPATC1	ANAPC5	SKP2	ANAPC10	CDC23	CDC16	ANAPC13	ANAPC1	BUB3	USP44	AURKA	PIMREG	UBE2C	CCNF	CDCA8	CENPE	ESPL1	PLK1	FBXO5	CDCA3	NEK2	MAD2L1	CCNA2	AURKB	PTTG1	CCNB1	CCNB2	BUB1B	CDK1	BUB1	CDC34	NCAPG	WWP2	USP2	STAM2
Fold Change in COVID v Flu	0.415043	-0.174853	-0.149541	-0.0527161	-0.0372498	-0.0320844	-0.0286241	-0.0261817	-0.022078	-0.0204558	-0.015249	-0.00944021	-0.00297469	0.0102305	0.0161513	0.0191165	0.0367798	0.0557499	0.0668558	0.0671101	0.0720034	0.0733013	0.0836046	0.0894326	0.115653	0.132198	0.132602	0.191284	0.19823	0.210376	0.21063	0.222964	0.237806	0.239194	0.250154	0.251568	0.257483	0.272268	0.281882	0.310688	0.318408	0.326893	0.34197	0.37532	-0.173179	-0.158461	-0.134169	-0.115558	-0.0996122
GO Term	Cell Cycle WP179	Regulation of sister chromatid separation at the metaphase-anaphase transition WP4240	Retinoblastoma Gene in Cancer WP2446	Interleukin-1 Induced Activation of NF-kappa-B WP3656	Proteasome Degradation WP183
Adjusted P-Value	2.31831e-29	4.71648e-16	2.58107e-05	0.00657584	0.0371207
P-Value	2.72743e-31	1.10976e-17	9.10966e-07	0.000309451	0.00218357
7th TOP pathway, peak marker ALYREF	ALYREF	DDX39B	HNRNPC	SRRT	SRSF1	CLK1	HNRNPA2B1	SRPK1	CHTOP	SRSF3	SRSF7	TRA2B	HNRNPA1	HNRNPK	HNRNPH2	SRSF5	HNRNPH3	TRA2A	PABPN1	FYTTD1	HNRNPF	HNRNPL	HNRNPH1	SRSF11	SRSF9	PABPN1L	RBM42	RBFOX2	HNRNPA3	ARGLU1	DHX9	ZRANB2	HNRNPDL	RBMX	AKAP8L
Fold Change in COVID v Flu	0.0973155	-0.0354797	0.0127445	0.045186	0.0750822	-0.0406681	-0.0386153	-0.0267723	-0.00678705	0.0306611	0.0546742	0.0560311	0.063705	-0.0576649	-0.0318476	-0.0275304	-0.0273936	-0.0170713	-0.011508	-0.00555245	0.00893042	0.0178834	0.0458241	0.0496127	0.0497099	-0.0109283	-0.00252539	0.000460968	0.011972	0.0160526	0.028	0.0283327	0.0324683	0.0456667	-0.0192315
GO Term	mRNA Processing WP411	MECP2 and Associated Rett Syndrome WP3584	Inhibition of exosome biogenesis and secretion by Manumycin A in CRPC cells WP4301	LncRNA involvement in canonical Wnt signaling and colorectal cancer WP4258	Circadian rhythm related genes WP3594
Adjusted P-Value	5.27404e-28	0.0425371	0.113388	0.323311	0.45742
P-Value	1.05481e-28	0.0170149	0.0680327	0.258649	0.45742
8th TOP pathway, peak marker BCL2L1	BCL2L1	CASP8	HEBP2	TPT1	BECN1	BAK1	BAX	SPNS1	BAD	BID	TP53	BCL2L11	PMAIP1	BIK	BBC3	XIAP	TNFAIP8L2	UVRAG	PIK3C3	RNF34	SIRT7	DMTF1	DRAM1	MDM4	NMT1	ZNF148	ATG14	ATG9A	BANP	BCL2L2	ZBTB7A	BCAP31	PIN1	ABCB1	PIK3R4	NDRG1	KMT5A	FADD	HIC1	MAPKAPK5	RFFL	E4F1	CASP6	CASP7	CASP3	SLK	SATB1	CASP9	COA8
Fold Change in COVID v Flu	-0.195917	-0.106751	-0.0660234	-0.06564	-0.048025	-0.0194071	-0.00603794	-0.00248951	0.0115293	0.0194465	0.0314529	0.0594865	0.137438	0.145128	0.182183	-0.0844836	-0.065068	-0.036077	-0.0329406	-0.03095	-0.026562	-0.0239633	-0.0187912	-0.0185565	-0.0132058	-0.00802266	-0.00346348	-0.00221477	0.00281913	0.00617714	0.00672488	0.00826357	0.0170001	0.0171718	0.0193907	0.0206946	0.0211559	0.0223973	0.022574	0.0265448	0.0303251	0.0303651	0.0529291	0.0615168	0.064792	-0.0215836	-0.0181548	-0.0121434	0.00112981
GO Term	Apoptosis Modulation and Signaling WP1772	Apoptosis WP254	Nanomaterial induced apoptosis WP2507	miRNA regulation of p53 pathway in prostate cancer WP3982	TNF alpha Signaling Pathway WP231
Adjusted P-Value	3.38169e-25	5.7354e-22	6.29252e-16	2.69122e-11	2.18018e-10
P-Value	2.81807e-27	9.559e-24	1.57313e-17	8.97073e-13	9.08407e-12
9th TOP pathway, peak marker MAML3	MAML3	NOTCH4	RBPJ	NOTCH2	NOTCH1	NOTCH3	MAML1	MAMLD1	MAML2	FOXD4L1	NUMBL	LFNG	POFUT1	MFNG	POGLUT1	NOTCH2NLA
Fold Change in COVID v Flu	-0.295925	-0.184257	-0.0885585	-0.0584817	-0.0583598	-0.0502832	-0.033223	-0.0302578	-0.0498301	-0.0486258	-0.0266864	-0.0107273	0.0204364	0.0257982	0.02636	0.0274119
GO Term	Notch Signaling WP268	Canonical and Non-canonical Notch signaling WP3845	Notch Signaling Pathway WP61	Role of Osx and miRNAs in tooth development WP3971	Neural Crest Differentiation WP2064
Adjusted P-Value	1.79871e-19	7.69203e-17	7.4204e-16	2.64919e-08	8.43348e-07
P-Value	7.82049e-21	6.68872e-18	9.67878e-17	4.60728e-09	1.83337e-07
10th TOP pathway, peak marker ACTL6A	ACTL6A	SMARCB1	SMARCD2	SMARCA2	SMARCC2	SMARCC1	SMARCA4	SMARCD1	ARID1B	DPF2
Fold Change in COVID v Flu	0.10634	0.0948149	-0.0824513	-0.0382673	-0.0201253	-0.0124904	0.0382253	0.00789432	0.0335994	-0.0239984
GO Term	Tumor suppressor activity of SMARCB1 WP4204	Thermogenesis WP4321	Rett syndrome causing genes WP4312	Hematopoietic Stem Cell Gene Regulation by GABP alpha/beta Complex WP3657	Gastric Cancer Network 1 WP2361
Adjusted P-Value	2.83029e-19	1.80924e-14	0.0130963	0.121012	0.129854
P-Value	2.35857e-20	3.01541e-15	0.00327407	0.0403374	0.0541056
11th TOP pathway, peak marker LSM5	LSM5	SART1	PHF5A	PRPF3	LSM8	LSM3	LSM7	PRPF31	LSM6	LSM2	LSM4	NAA38	SNU13	SNRPG	SNRPD2	SNRPE	WDR44	SNRNP200	SF3A2	SF3B1	CDC5L	TMA7	DDX23	ZMAT2	PRKRIP1	PRPF8	PRPF6	SNRNP35	UBL5	WBP4	HMGXB3	TUT1	SF3B3	SART3	SF3B5	SF3B6	THRAP3	PCBP1	CDC42BPB	SMIM20	ZDHHC17	CWC22	SPPL3	DDX5	DIDO1	ZNF638	CHERP	CCDC84	ZNF653
Fold Change in COVID v Flu	0.16348	-0.109217	-0.0198758	-0.00468821	0.0232768	0.0245764	0.0303249	0.0371896	0.0500635	0.0521219	0.0610355	0.0684185	0.0739593	0.0938143	0.0967765	0.146918	-0.0520743	-0.0421222	-0.0354657	-0.0300966	-0.0289463	-0.0285662	-0.0271601	-0.0153395	-0.0108778	-0.00117713	0.00115632	0.0081688	0.0113731	0.0226581	0.0233401	0.0324558	0.0391271	0.0391703	0.0401605	-0.0288804	-0.0277826	-0.0271988	-0.0258383	-0.0238822	-0.0238516	-0.0231969	-0.016063	-0.0153019	-0.0135009	-0.0107831	-0.00750912	-0.00750117	-0.00715782
GO Term	mRNA Processing WP411	Circadian rhythm related genes WP3594	Interactome of polycomb repressive complex 2 (PRC2) WP2916	Ciliary landscape WP4352	LncRNA involvement in canonical Wnt signaling and colorectal cancer WP4258
Adjusted P-Value	2.34456e-18	0.189792	0.267761	0.346508	0.371583
P-Value	2.13142e-19	0.0345077	0.0730258	0.252006	0.304023
12th TOP pathway, peak marker EZH2	EZH2	KDM6B	PIK3IP1	PHF19	EED	YY1	ASXL1	SUZ12	AEBP2	EZH1	TFCP2	PHF1	MTF2	JARID2	RBBP4	UBP1	ZNF410	MTA1
Fold Change in COVID v Flu	0.161282	-0.13341	-0.116451	0.0122568	0.0446391	0.0451869	0.0753824	0.0784687	0.0939896	-0.0524959	-0.0231635	-0.0174682	0.00686286	0.00850985	0.0511924	0.00914826	0.0101508	0.0311643
GO Term	Interactome of polycomb repressive complex 2 (PRC2) WP2916	Tumor suppressor activity of SMARCB1 WP4204	Histone Modifications WP2369	Endoderm Differentiation WP2853	Epithelial to mesenchymal transition in colorectal cancer WP4239
Adjusted P-Value	1.53729e-17	4.60919e-06	1.28959e-05	0.00059852	0.000662333
P-Value	8.09098e-19	4.85177e-07	2.03619e-06	0.000126004	0.000174298
13th TOP pathway, peak marker ATG7	ATG7	GABARAP	GABARAPL2	ATG3	GABARAPL1	ATG12	ATG10	MAP1LC3A	WDFY4	TBC1D25	ATG16L1	ATG4A	ATG4D	MAP1LC3B2	ATG4B	TP53INP2	ATG5	TECPR1	WIPI2
Fold Change in COVID v Flu	-0.126084	-0.0892057	-0.0853003	-0.0616865	-0.0420031	-0.0300991	0.00590274	0.0830441	-0.0464896	0.00426781	0.00447941	0.0101672	0.0115596	0.021641	0.0221005	0.0431403	0.0493063	-0.027444	-0.0202125
GO Term	Nanoparticle triggered autophagic cell death WP2509	Senescence and Autophagy in Cancer WP615	Ferroptosis WP4313	RIG-I-like Receptor Signaling WP3865	Factors and pathways affecting insulin-like growth factor (IGF1)-Akt signaling WP3850
Adjusted P-Value	2.1294e-17	9.49078e-17	0.00010637	0.00749761	0.0636253
P-Value	4.2588e-18	3.79631e-17	6.3822e-05	0.00599809	0.0636253
14th TOP pathway, peak marker EIF3L	EIF3L	EIF3G	EIF3D	EIF3H	EIF3B	EIF3C	EIF3K	EIF3M	EIF3F	EIF3E	EIF3I	MAPK1IP1L
Fold Change in COVID v Flu	0.112469	-0.017403	0.00981315	0.01	0.0109901	0.0207367	0.0418885	0.0532139	0.0671059	0.068014	0.0911393	0.0337537
GO Term	Translation Factors WP107
Adjusted P-Value	4.01718e-17
P-Value	4.01718e-17
15th TOP pathway, peak marker IL18	IL18	CASP1	IL18BP	CARD16	CARD8	PYCARD	NLRP1	GSDMD	NLRP7	NLRP12	NLRP2	POP1
Fold Change in COVID v Flu	-0.310582	-0.186048	-0.00336097	-0.169195	-0.162514	-0.119459	-0.047365	-0.0314548	-0.0636126	-0.0534668	0.00500708	0.0552949
GO Term	Nucleotide-binding Oligomerization Domain (NOD) pathway WP1433	TYROBP Causal Network WP3945	Viral Acute Myocarditis WP4298	IL1 and megakaryocytes in obesity WP2865	Sleep regulation WP3591
Adjusted P-Value	9.43156e-17	0.0238924	0.026626	0.0637285	0.0647913
P-Value	7.85963e-18	0.00398207	0.0066565	0.0371749	0.0323957
16th TOP pathway, peak marker ATP5PF	ATP5PF	ATP5PB	ATP5F1E	ATP5PO	ATP5PD	ATP5F1D	ATP5ME	ATP5MF	ATP5MGL	ATP5MG	C17orf80	SLC25A19	ATP5MPL
Fold Change in COVID v Flu	0.105294	0.00898715	0.0237903	0.0351118	0.0556511	0.0574204	0.066052	0.0719231	-0.000841563	0.0277785	0.0368515	0.0410592	0.0591738
GO Term	Oxidative phosphorylation WP623	Electron Transport Chain (OXPHOS system in mitochondria) WP111	Thiamine metabolic pathways WP4297
Adjusted P-Value	1.03843e-16	6.03545e-15	0.0163145
P-Value	3.46144e-17	4.02364e-15	0.0163145
17th TOP pathway, peak marker UQCRH	UQCRH	UQCRC1	UQCRC2	UQCRFS1	MT-CYB	UQCRB	UQCR10	CYC1	UQCRQ	COA6	UQCR11	ILVBL
Fold Change in COVID v Flu	0.139674	-0.00285658	0.0107539	0.0279749	0.0287423	0.0453054	0.0488318	0.0639639	0.0690829	-0.0564997	-0.000457419	0.0302893
GO Term	Nonalcoholic fatty liver disease WP4396	Electron Transport Chain (OXPHOS system in mitochondria) WP111
Adjusted P-Value	5.17849e-16	4.02364e-15
P-Value	2.58925e-16	4.02364e-15
18th TOP pathway, peak marker MNAT1	MNAT1	GTF2H2	CCNH	ERCC3	GTF2H1	CDK7	ERCC2	GTF2H3	CDK20	GTF2H5
Fold Change in COVID v Flu	0.13823	-0.0760443	-0.0490578	-0.0427789	0.00300849	0.0142615	0.052146	0.116907	-0.0124005	0.0996724
GO Term	Eukaryotic Transcription Initiation WP405	G1 to S cell cycle control WP45	Cell Cycle WP179	Fluoropyrimidine Activity WP1601	Cardiac Hypertrophic Response WP2795
Adjusted P-Value	8.7355e-16	0.00062459	0.0499606	0.104711	0.141972
P-Value	1.09194e-16	0.000156147	0.0187352	0.0523555	0.0887322
19th TOP pathway, peak marker TIMP2	TIMP2	MMP14	MMP17	RECK	MMP2	MMP15	FURIN	SPOCK2	MMP11
Fold Change in COVID v Flu	-0.14148	-0.129308	-0.0840419	-0.000103	0.00348811	0.0259519	-0.0189302	0.0175423	0.00683632
GO Term	Matrix Metalloproteinases WP129	AGE/RAGE pathway WP2324	Epithelial to mesenchymal transition in colorectal cancer WP4239	Photodynamic therapy-induced NF-kB survival signaling WP3617	Angiogenesis WP1539
Adjusted P-Value	5.62204e-15	0.015519	0.0396743	0.0609339	0.063288
P-Value	4.32465e-16	0.00238754	0.00915561	0.0328105	0.0292098
20th TOP pathway, peak marker HRAS	HRAS	NF1	RASGRP3	RAF1	ARAF	PIK3CG	RASA2	RASA1	SYNGAP1	RALGDS	PIK3CA	ZHX2	RASAL2	IKZF3	RASGRF1	ZNF182	RAP1A	ZBTB20	AGAP3
Fold Change in COVID v Flu	0.0802628	-0.0768898	-0.0728313	-0.0450233	-0.0446845	-0.0355178	-0.0312376	-0.0293024	-0.0214332	-0.00162826	0.00344166	0.0123173	0.0266166	0.068604	0.0784064	-0.0431934	-0.0213758	-0.00141387	-0.000311281
GO Term	Ras Signaling WP4223	Signaling of Hepatocyte Growth Factor Receptor WP313	Signaling Pathways in Glioblastoma WP2261	MAPK Signaling Pathway WP382	MET in type 1 papillary renal cell carcinoma WP4205
Adjusted P-Value	6.15737e-15	8.55574e-07	1.20667e-06	1.23195e-06	6.21229e-06
P-Value	5.59761e-17	2.33338e-08	4.38789e-08	2.23991e-08	2.82377e-07
21th TOP pathway, peak marker PPIL1	PPIL1	SNW1	SNRPF	SH3BGRL	ZMAT5	VWA3A	LSM10	EFTUD2	SNRPB2	SNRNP70	TGS1	CXorf56	SNRPB	SNRPA	PRPF19	SNRPD3	SNRPN	SNRPA1	SNRNP40	PPIH	SNRPC	MKRN3	SRRM2	CWF19L1	BUD31	ZC2HC1C	GOLGA8O	PRPF38A	CWF19L2	TRIR	PRCC	AAR2	PRPF40A	RBM3	UHRF1BP1	ZNF76	PLRG1	AQR	PRPF4	MEST	CCDC130	DHX35
Fold Change in COVID v Flu	0.170084	-0.0214663	0.158354	-0.109231	-0.0932299	-0.0830137	-0.0312662	-0.00895611	-0.00130816	0.0148206	0.0153649	0.0191602	0.0302928	0.041022	0.0568887	0.0639844	0.0763145	0.079621	0.080438	0.0857956	0.0979602	-0.0577485	-0.053819	-0.0524719	-0.049804	-0.02938	-0.0138976	-0.0053403	-0.000723816	0.00224304	0.00524253	0.00581836	0.0102317	0.0174327	0.0348725	0.0383302	0.0408614	0.0426135	0.0438369	0.0656794	0.00438002	0.0197853
GO Term	mRNA Processing WP411	Prader-Willi and Angelman Syndrome WP3998	Ciliary landscape WP4352	Notch Signaling Pathway WP61	MET in type 1 papillary renal cell carcinoma WP4205
Adjusted P-Value	7.7595e-15	0.0484642	0.137744	0.229982	0.254543
P-Value	7.0541e-16	0.00881168	0.0375665	0.188167	0.185122
22th TOP pathway, peak marker GNB4	GNB4	GNG5	GNGT2	GNG7	PDCL	GNG11	GNG2	GNAO1	CTBS	GRK2	GPR68	GNAL	GNAS	GNB5	GRM6	PTGER4	OR52I2	OR56B1	OR2AK2	ADCY9	REEP2	OR52N4	OPN3	RGS11	OR5B21	OR56A1	OR4D1	RGS9	RRH
Fold Change in COVID v Flu	-0.233253	-0.1122	-0.0712391	0.0070098	0.0323015	0.0891303	0.113014	0.141867	-0.0989045	-0.0543031	0.057822	0.064572	0.0686837	0.110222	-0.0997711	-0.0685557	-0.0283407	-0.0275936	-0.0273509	-0.0182499	-0.014923	-0.0025481	0.0184056	0.0217558	0.0264816	0.0358537	0.0391941	0.0761601	0.103325
GO Term	Calcium Regulation in the Cardiac Cell WP536	Myometrial Relaxation and Contraction Pathways WP289	G Protein Signaling Pathways WP35	Chemokine signaling pathway WP3929	Ras Signaling WP4223
Adjusted P-Value	1.22333e-14	1.42792e-12	2.06697e-11	3.65466e-09	5.84531e-06
P-Value	4.21836e-16	9.84773e-14	2.13825e-12	5.04091e-10	1.00781e-06
23th TOP pathway, peak marker ITGB1	ITGB1	FLNC	ITGA11	ITGA2	ITGA7	ITGA5	EMILIN1	TNS4	ITGA10	ITGA8	ITGA3	ITGA6	LAMA4	CORO2B	KY	CDKL3
Fold Change in COVID v Flu	0.13889	-0.133921	-0.110411	-0.0107501	-0.00504118	0.00146424	0.025341	0.0579057	0.0648693	0.0939641	0.122436	0.131844	-0.126798	-0.0908769	-0.0115768	0.0392803
GO Term	Focal Adhesion WP306	Arrhythmogenic Right Ventricular Cardiomyopathy WP2118	Integrin-mediated Cell Adhesion WP185	Hippo-Merlin Signaling Dysregulation WP4541	Focal Adhesion-PI3K-Akt-mTOR-signaling pathway WP3932
Adjusted P-Value	2.24467e-14	3.88894e-14	3.63355e-13	1.23545e-12	2.69498e-11
P-Value	1.60334e-15	1.38891e-15	3.89309e-14	1.76493e-13	4.81247e-12
24th TOP pathway, peak marker CCNE1	CCNE1	CDKN1B	CDK6	CDK2	CDK4	CDKN2C	CINP	SPDYA	CCND1	CDKN2B	TSPYL2
Fold Change in COVID v Flu	0.334378	-0.0698513	0.0744136	0.0788645	0.141568	-0.0293222	-0.025894	-0.0242115	0.017114	0.0577628	0.14106
GO Term	G1 to S cell cycle control WP45	Signaling Pathways in Glioblastoma WP2261	Cell Cycle WP179	miRNA Regulation of DNA Damage Response WP1530	DNA Damage Response WP707
Adjusted P-Value	3.10992e-14	1.33313e-13	2.24284e-12	2.55265e-09	2.65819e-09
P-Value	4.31934e-16	3.70315e-15	9.34517e-14	1.77268e-10	1.47677e-10
25th TOP pathway, peak marker B4GALNT1	B4GALNT1	B3GALT4	ST8SIA5	ST3GAL5	SLC33A1
Fold Change in COVID v Flu	-0.118387	-0.0534527	-0.0331584	-0.0204643	0.0710079
GO Term	Ganglio Sphingolipid Metabolism WP1423	Metabolism of Spingolipids in ER and Golgi apparatus WP4142
Adjusted P-Value	4.0477e-14	0.00818661
P-Value	2.02385e-14	0.00818661
26th TOP pathway, peak marker PRKDC	PRKDC	XRCC4	XRCC5	XRCC6	NHEJ1	APTX	LIG4	DCLRE1C	POLM	PAXX	ENDOV
Fold Change in COVID v Flu	-0.110566	-0.107253	-0.000123209	0.0524945	0.0320286	0.0693819	0.0716495	-0.0605218	-0.0137359	0.00266461	0.0445324
GO Term	Non-homologous end joining WP438	DNA IR-Double Strand Breaks (DSBs) and cellular response via ATM WP3959	ATM Signaling Network in Development and Disease WP3878	DNA IR-damage and cellular response via ATR WP4016	Fas Ligand (FasL) pathway and Stress induction of Heat Shock Proteins (HSP) regulation WP314
Adjusted P-Value	6.06947e-14	0.0064463	0.00672275	0.0105245	0.108827
P-Value	5.5177e-15	0.00175808	0.00122232	0.00382708	0.049467
27th TOP pathway, peak marker COX5A	COX5A	COX7C	COX6B1	MT-CO2	COX4I1	COX6C	COX7A2	COX7B	TMEM220	COX7A2L
Fold Change in COVID v Flu	0.0860282	-0.0486248	-0.0247536	0.0144683	0.0567799	0.0592389	-0.0109773	-0.00863525	-0.00578276	0.0119591
GO Term	Electron Transport Chain (OXPHOS system in mitochondria) WP111	Nonalcoholic fatty liver disease WP4396	Arachidonate Epoxygenase / Epoxide Hydrolase WP678	Ciliary landscape WP4352
Adjusted P-Value	8.74834e-14	7.19261e-13	0.0109155	0.291183
P-Value	2.18708e-14	3.5963e-13	0.00818661	0.291183
28th TOP pathway, peak marker PER1	PER1	CRY1	ARNTL	PER3	CLOCK	CIPC	DBP	RAI1	NPAS2
Fold Change in COVID v Flu	-0.514756	0.0747147	-0.0505103	0.0278705	0.0563149	-0.0416653	-0.00258526	0.0133313	0.0227662
GO Term	Circadian rhythm related genes WP3594	Melatonin metabolism and effects WP3298	Exercise-induced Circadian Regulation WP410	Sleep regulation WP3591	Hedgehog Signaling Pathway WP47
Adjusted P-Value	1.25042e-13	1.0973e-09	1.17642e-06	0.00070823	0.0255876
P-Value	2.50085e-14	4.3892e-10	7.0585e-07	0.000566584	0.0255876
29th TOP pathway, peak marker IL1R1	IL1R1	IRAK4	MYD88	IL1B	TRAF6	IRAK1	TLR6	TLR10	DHX36	TLR9	TIRAP	SARM1	IRAK2
Fold Change in COVID v Flu	-0.303845	-0.153947	-0.140354	-0.0522903	-0.0242641	0.0237072	-0.133815	-0.0475609	-0.0131109	-0.0103984	0.0399902	0.0406856	0.0782663
GO Term	Regulation of toll-like receptor signaling pathway WP1449	Toll-like Receptor Signaling WP3858	Simplified Depiction of MYD88 Distinct Input-Output Pathway WP3877	Toll-like Receptor Signaling Pathway WP75	IL-1 signaling pathway WP195
Adjusted P-Value	1.38282e-13	4.35412e-12	1.11909e-11	3.24537e-11	8.69417e-11
P-Value	2.51422e-15	1.58332e-13	6.10412e-13	2.36027e-12	7.90379e-12
30th TOP pathway, peak marker CHKA	CHKA	GPCPD1	PCYT2	PNPLA7	PNPLA6	CHKB	LYPLA2	ETNK2	ETNK1
Fold Change in COVID v Flu	-0.177156	-0.113204	0.0832541	-0.0695111	-0.058922	-0.049497	-0.0357003	-0.0130325	0.0334486
GO Term	Kennedy pathway from Sphingolipids WP3933	One carbon metabolism and related pathways WP3940	Glycerophospholipid Biosynthetic Pathway WP2533	Acetylcholine Synthesis WP528	MTHFR deficiency WP4288
Adjusted P-Value	3.94651e-13	1.14899e-10	0.00033392	0.0107538	0.0313378
P-Value	5.63787e-14	3.28284e-11	0.000143109	0.006145	0.0223841
31th TOP pathway, peak marker EIF4G3	EIF4G3	EIF4A2	AGBL5	EIF4E	EIF4EBP1	EIF4EBP2	EIF4A1	EIF4G1	PTBP2	EIF4H	EIF4G2	DHX29	RPTOR	RHEB
Fold Change in COVID v Flu	-0.116927	0.0120751	0.0433724	0.107364	-0.0712023	-0.0243724	0.0304991	0.0318996	-0.0189332	-0.0163485	-0.00165093	0.0222926	0.0459756	-0.00353692
GO Term	Translation Factors WP107	Interferon type I signaling pathways WP585	PI3K-AKT-mTOR signaling pathway and therapeutic opportunities WP3844	Target Of Rapamycin (TOR) Signaling WP1471	Angiopoietin Like Protein 8 Regulatory Pathway WP3915
Adjusted P-Value	6.37695e-13	9.56181e-05	0.000442794	0.000493122	0.000803772
P-Value	1.93241e-14	5.79504e-06	4.0254e-05	5.97724e-05	0.000121784
32th TOP pathway, peak marker ARPC5L	ARPC5L	ARPC2	ARPC1B	ARPC4	ARPC3	ACTR3	ARPC1A	ACTR2	EFHD2	ARPC5	AVIL	SCRN2
Fold Change in COVID v Flu	0.119792	-0.107236	-0.0731564	-0.0710795	-0.0710499	-0.0534821	-0.0394578	-0.00523404	-0.0928844	-0.0715852	-0.0473692	-0.00785507
GO Term	Pathogenic Escherichia coli infection WP2272	Association Between Physico-Chemical Features and Toxicity Associated Pathways WP3680	Microglia Pathogen Phagocytosis Pathway WP3937	ESC Pluripotency Pathways WP3931	Regulation of Actin Cytoskeleton WP51
Adjusted P-Value	8.66852e-13	0.0122869	0.110604	0.187268	0.193591
P-Value	1.7337e-13	0.00491476	0.0663627	0.149815	0.193591
33th TOP pathway, peak marker CDC25A	CDC25A	NEK11	CHEK1	TOPBP1	ATR	ATM	RAD51	EXO5	SPIDR	TAOK3	RAD52	TP53BP1	ATRX	RBBP8	TTC5	CHEK2	TRIM28	ATMIN	PSMC3IP	RAD54B	RAD51AP1	ZNF611	ZNF655	ZNF223	ZNF727	ZNF45	ZNF689	ZNF700	ZNF250	ZNF222	ZNF211	ZNF641	ZNF189	ZNF101	ZNF350	ZNF669	ZNF587	ZNF429	ZNF34	ZNF160	ZNF562	ZNF266	ZNF701	ZNF354A	ZNF267	ZNF430	ZKSCAN1	ZNF324	ZNF227
Fold Change in COVID v Flu	0.378637	0.0235514	0.284266	-0.0157802	0.00967301	0.0804967	0.250353	-0.117808	-0.0468197	-0.0273263	-0.00166432	0.00408526	0.00656882	0.0147058	0.0423239	0.0507423	0.0622552	0.0658319	0.0849581	0.152505	0.2008	-0.0592811	-0.0510107	-0.0504183	-0.0493081	-0.0491362	-0.0477995	-0.0467583	-0.045972	-0.0446194	-0.0445313	-0.0422968	-0.0419276	-0.0405853	-0.0389768	-0.0387746	-0.0362217	-0.0356349	-0.0343327	-0.0335307	-0.0312178	-0.030765	-0.0306725	-0.0300716	-0.0292471	-0.0287239	-0.0269457	-0.0266803	-0.0259921
GO Term	DNA IR-damage and cellular response via ATR WP4016	ATM Signaling Network in Development and Disease WP3878	DNA IR-Double Strand Breaks (DSBs) and cellular response via ATM WP3959	miRNA Regulation of DNA Damage Response WP1530	DNA Damage Response WP707
Adjusted P-Value	1.04004e-12	1.8577e-11	5.87979e-11	1.55618e-08	1.57423e-08
P-Value	3.15162e-14	1.12588e-12	5.34526e-12	2.35785e-09	1.90816e-09
34th TOP pathway, peak marker WLS	WLS	WNT5A	WNT16	FZD2	FZD5	ROR1	ROR2	RYK
Fold Change in COVID v Flu	0.311909	-0.185068	0.0227225	-0.081832	0.00722207	0.0135595	0.0455056	0.0952344
GO Term	ncRNAs involved in Wnt signaling in hepatocellular carcinoma WP4336	LncRNA involvement in canonical Wnt signaling and colorectal cancer WP4258	Wnt Signaling WP428	Wnt Signaling in Kidney Disease WP4150	Wnt Signaling Pathway and Pluripotency WP399
Adjusted P-Value	1.28366e-12	1.61348e-12	5.86451e-12	2.20147e-07	1.15737e-05
P-Value	6.7561e-14	1.6984e-13	9.25975e-13	4.63467e-08	3.65486e-06
35th TOP pathway, peak marker ALG14	ALG14	ALG13	DPAGT1	DOLK	SRD5A3	SRD5A1
Fold Change in COVID v Flu	0.171365	-0.0157758	0.101231	0.0643823	-0.0266287	0.0177404
GO Term	Glycosylation and related congenital defects. WP4521
Adjusted P-Value	1.86194e-12
P-Value	1.86194e-12
36th TOP pathway, peak marker GNAI3	GNAI3	RGS10	GNB1	GNAQ	FNDC1	KCNJ5	KCNJ9	GLP1R	GNA15	GNA11	TUB	RGS2	PLCB3	CHRM3	RIC8B
Fold Change in COVID v Flu	-0.120378	-0.11545	-0.0769094	-0.0649393	-0.0428293	-0.0399326	-0.00775144	0.0263306	0.0449817	0.0595431	-0.0369537	-0.0291134	-0.0228908	0.0108879	0.0595207
GO Term	Calcium Regulation in the Cardiac Cell WP536	G Protein Signaling Pathways WP35	Myometrial Relaxation and Contraction Pathways WP289	Pathways Regulating Hippo Signaling WP4540	GPR40 Pathway WP3958
Adjusted P-Value	2.0346e-12	7.61558e-08	4.33534e-05	0.000249025	0.0020806
P-Value	5.81315e-14	4.35176e-09	3.71601e-06	2.846e-05	0.000356675
37th TOP pathway, peak marker PTCH1	PTCH1	SHH	SMO	CDON	DISP2	PTCH2	DISP1	BOC	HHAT
Fold Change in COVID v Flu	0.0929677	-0.0883227	-0.0319449	0.0545415	-0.0391417	-0.00324362	0.00779158	0.0116648	0.038444
GO Term	Hedgehog Signaling Pathway WP4249	Hedgehog Signaling Pathway WP47	EDA Signalling in Hair Follicle Development WP3930	Ectoderm Differentiation WP2858	Tumor suppressor activity of SMARCB1 WP4204
Adjusted P-Value	2.08723e-12	4.46799e-09	0.000264309	0.000873877	0.00141596
P-Value	1.49088e-13	6.38284e-10	5.66376e-05	0.000249679	0.000505699
38th TOP pathway, peak marker EXOC6	EXOC6	EXOC7	EXOC3	EXOC8	EXOC4	EXOC2	EXOC5	EXOC1	EXOC3L4	TNFAIP2	EDRF1	DUSP22	EXOC6B
Fold Change in COVID v Flu	-0.155245	-0.112611	-0.084808	-0.044186	-0.00483233	0.0324497	0.0478382	-0.0775033	-0.0652835	-0.00769219	0.00353384	0.00904049	0.033651
GO Term	Ciliary landscape WP4352	RalA downstream regulated genes WP2290	Simplified Interaction Map Between LOXL4 and Oxidative Stress Pathway WP3670	Chromosomal and microsatellite instability in colorectal cancer WP4216	Angiopoietin Like Protein 8 Regulatory Pathway WP3915
Adjusted P-Value	2.09141e-12	0.000496299	0.0619886	0.185794	0.230476
P-Value	3.48568e-13	0.000165433	0.0309943	0.123862	0.192063
39th TOP pathway, peak marker IL17RA	IL17RA	IL17RC	TRAF3IP2	IL17RE	IL17RB
Fold Change in COVID v Flu	-0.129042	-0.0899336	-0.0234882	0.051194	0.100941
GO Term	IL17 signaling pathway WP2112
Adjusted P-Value	2.32743e-12
P-Value	2.32743e-12
40th TOP pathway, peak marker NFKBIA	NFKBIA	IKBKB	CHUK	NFKB1	MAP3K14	ZFP91
Fold Change in COVID v Flu	-0.102804	-0.0522488	-0.0442068	-0.0076916	-0.019709	0.0105444
GO Term	MAPK and NFkB Signalling Pathways Inhibited by Yersinia YopJ WP3849	EBV LMP1 signaling WP262	Signal transduction through IL1R WP4496	Role Altered Glycolysation of MUC1 in Tumour Microenvironment WP4480	TNF related weak inducer of apoptosis (TWEAK) Signaling Pathway WP2036
Adjusted P-Value	3.1919e-12	4.10051e-11	1.59535e-10	3.43105e-10	4.41982e-10
P-Value	3.46946e-14	8.91414e-13	5.20222e-12	1.49176e-11	2.88249e-11
41th TOP pathway, peak marker DSCC1	DSCC1	CHTF18	RFC4	CHTF8	DDX11	PRIM1	POLA2	PRIM2	POLA1	ZFX	POLE	POLE2
Fold Change in COVID v Flu	0.197349	0.118868	0.152278	-0.0316542	0.0335359	0.102699	0.0189182	0.0415037	0.0828022	-0.0281206	0.0735061	0.069199
GO Term	DNA Replication WP466	Pyrimidine metabolism WP4022	G1 to S cell cycle control WP45	Gastric Cancer Network 2 WP2363	Retinoblastoma Gene in Cancer WP2446
Adjusted P-Value	3.93678e-12	2.45751e-08	2.88123e-07	7.51239e-07	9.61826e-07
P-Value	5.62397e-13	7.02146e-09	1.23481e-07	4.2928e-07	6.87018e-07
42th TOP pathway, peak marker DYNC1LI1	DYNC1LI1	DYNC1H1	DYNC1LI2	DYNC1I2	DYNLRB1	NUDCD3
Fold Change in COVID v Flu	-0.0444196	-0.0295023	-0.0279041	-0.0148016	0.00730792	0.0267326
GO Term	Intraflagellar transport proteins binding to dynein WP4532	Ciliary landscape WP4352
Adjusted P-Value	4.65486e-12	1.4734e-05
P-Value	2.32743e-12	1.4734e-05
43th TOP pathway, peak marker NPHS1	NPHS1	KIRREL3	KIRREL2	CD2AP	KIRREL1	SYNPO	INF2
Fold Change in COVID v Flu	-0.241207	-0.220645	-0.148411	-0.139715	-0.103964	0.138089	0.109947
GO Term	Primary Focal Segmental Glomerulosclerosis FSGS WP2572
Adjusted P-Value	5.38937e-12
P-Value	5.38937e-12
44th TOP pathway, peak marker KMO	KMO	AFMID	KYAT3	KYNU	HAAO
Fold Change in COVID v Flu	-0.102286	-0.0305919	-0.000286556	0.0275395	0.0206626
GO Term	NAD Biosynthesis II (from tryptophan) WP2485	Tryptophan catabolism leading to NAD+ production WP4210	Tryptophan metabolism WP465	Selenium Micronutrient Network WP15
Adjusted P-Value	5.97097e-12	6.09892e-11	1.50369e-06	0.00100218
P-Value	1.49274e-12	3.04946e-11	1.12777e-06	0.00100218
45th TOP pathway, peak marker GLI1	GLI1	SUFU	ULK3	GLI2	GLI3	STK36	ULK4
Fold Change in COVID v Flu	0.104503	-0.0833913	0.00320961	-0.0268726	-0.00651296	0.00313342	0.0385674
GO Term	Hedgehog Signaling Pathway WP47	Hedgehog Signaling Pathway WP4249	Tumor suppressor activity of SMARCB1 WP4204	Dopaminergic Neurogenesis WP2855	Tgif disruption of Shh signaling WP3674
Adjusted P-Value	6.30468e-12	2.8018e-07	1.49943e-05	0.000511547	0.0176885
P-Value	5.2539e-13	4.66967e-08	3.74859e-06	0.000170516	0.00737022
46th TOP pathway, peak marker HSP90B1	HSP90B1	CNPY3	HSPA5	CALR	PDIA6	HYOU1	WFS1	DNAJC3	SIL1	SFXN5	PDIA3	CANX	P4HB	SLC35B2	P4HA2	ERO1A	ERP27	P3H2	P4HA1	ERO1B	COL13A1
Fold Change in COVID v Flu	0.331356	-0.0614694	0.104724	0.124275	0.14273	0.181925	0.194425	-0.00147476	0.00602478	0.0237643	0.0344343	0.0838476	0.0943877	0.0972596	-0.0427091	-0.0345069	-0.00457169	0.00642911	0.0234842	0.0305601	-0.022119
GO Term	Photodynamic therapy-induced unfolded protein response WP3613	Prion disease pathway WP3995	Vitamin D Receptor Pathway WP2877	Amino Acid metabolism WP3925	Androgen receptor signaling pathway WP138
Adjusted P-Value	9.54415e-12	0.000126342	0.243248	0.254289	0.256825
P-Value	7.95346e-13	2.1057e-05	0.202707	0.127144	0.149815
47th TOP pathway, peak marker CLDN12	CLDN12	CLDN23	CLDN11	CLDN7	CLDN15	CLDN9	CLDN5
Fold Change in COVID v Flu	0.158327	-0.109579	-0.0804172	-0.0122244	-0.00820981	0.0644361	0.1048
GO Term	Epithelial to mesenchymal transition in colorectal cancer WP4239	Exercise-induced Circadian Regulation WP410	Ectoderm Differentiation WP2858
Adjusted P-Value	1.85846e-11	0.092352	0.155312
P-Value	6.19487e-12	0.061568	0.155312
48th TOP pathway, peak marker HLA-DRB1	HLA-DRB1	HLA-DRA	HLA-DMA	CD74	HLA-DOB	HLA-DOA	HLA-DRB5	HLA-DQB2	CTSK	CTSF	HLA-DQA2
Fold Change in COVID v Flu	-0.116212	-0.114753	-0.0549453	-0.111978	-0.0314988	0.0106336	0.0363804	-0.0696895	0.0717956	0.0826619	-0.0648812
GO Term	Ebola Virus Pathway on Host WP4217	Allograft Rejection WP2328	Cytokines and Inflammatory Response WP530	Macrophage markers WP4146	Osteoclast Signaling WP12
Adjusted P-Value	2.5491e-11	4.89507e-11	0.00107164	0.0448649	0.0483799
P-Value	4.63473e-12	4.45006e-12	0.000292265	0.0163145	0.0263891
49th TOP pathway, peak marker HSD17B4	HSD17B4	ACAA1	EHHADH	MPV17	ACOX3	ECH1	DECR2	ACOX2	CRAT	ACOX1	C6orf226	DHRS4	ACSL5	SLC25A20	PECR	QPCT	HTD2	AMACR	ACSBG1
Fold Change in COVID v Flu	-0.0934369	-0.070764	-0.0251472	-0.000525903	0.0193726	0.0244392	0.0361584	0.0764184	0.0916829	-0.028567	-0.0162134	-0.00692006	0.00731013	0.0170321	0.0204661	0.0589203	0.0605881	0.0681988	0.0705036
GO Term	PPAR signaling pathway WP3942	Mitochondrial LC-Fatty Acid Beta-Oxidation WP368	Fatty Acid Biosynthesis WP357	Fatty Acid Beta Oxidation WP143	PPAR Alpha Pathway WP2878
Adjusted P-Value	3.42058e-11	4.71122e-05	8.56556e-05	0.00018518	0.00196437
P-Value	2.28039e-12	6.28162e-06	1.71311e-05	4.93814e-05	0.00065479
50th TOP pathway, peak marker COPS4	COPS4	COPS7A	COPS5	COPS3	GPS1	COPS6	COPS7B	BTBD1	COPS8	COPS2	LRR1	FEM1B
Fold Change in COVID v Flu	0.0969246	-0.0653482	0.00429434	0.00662085	0.0261142	0.029153	0.0506585	0.057045	0.0617859	0.0718736	0.0130977	0.0218276
GO Term	Ciliary landscape WP4352	Splicing factor NOVA regulated synaptic proteins WP4148	Nucleotide-binding Oligomerization Domain (NOD) pathway WP1433	Mammary gland development pathway - Pregnancy and lactation (Stage 3 of 4) WP2817	TGF-beta Signaling Pathway WP366
Adjusted P-Value	4.30313e-11	0.0798366	0.103862	0.104834	0.189231
P-Value	8.60627e-12	0.0638693	0.0623172	0.0419335	0.189231
51th TOP pathway, peak marker NUP37	NUP37	NUP43	SEC13	DIPK2A	SEC24B	SEC16A	SEC31A	SEC31B	TFG	PDCD6	SCYL1	SEC23IP	SEC23B	SAR1A
Fold Change in COVID v Flu	0.0963035	0.00798268	0.0575083	-0.0341229	-0.0338356	-0.00225865	0.048429	0.0522087	-0.0401701	-0.0256494	-0.0236092	-0.0108073	0.0176743	0.0190815
GO Term	Sterol Regulatory Element-Binding Proteins (SREBP) signalling WP1982	Glycosylation and related congenital defects. WP4521
Adjusted P-Value	5.08549e-11	0.033998
P-Value	2.54274e-11	0.033998
52th TOP pathway, peak marker IDH3A	IDH3A	IDH3G	IDH3B	ACO2	IDH2	IDH1	D2HGDH
Fold Change in COVID v Flu	0.0678183	-0.0387413	0.00853536	0.0242077	-0.0368016	-0.0356674	0.0225618
GO Term	TCA Cycle (aka Krebs or citric acid cycle) WP78	Metabolic reprogramming in colon cancer WP4290	Cerebral Organic Acidurias, including diseases WP4519	Cytosine methylation WP3585	TCA Cycle and Deficiency of Pyruvate Dehydrogenase complex (PDHc) WP2453
Adjusted P-Value	5.49285e-11	6.6221e-05	8.64237e-05	0.000110964	0.000257854
P-Value	7.84693e-12	1.89203e-05	3.70387e-05	6.34081e-05	0.000184181
53th TOP pathway, peak marker HIF1A	HIF1A	EGLN2	EGLN1	HIF1AN	VHL	ARNT	HIGD1A	EGLN3	WBP1L	HIF3A	SLC49A4	LIMD1	METRN
Fold Change in COVID v Flu	-0.110259	-0.0697807	-0.0615449	-0.0242227	-0.014913	-0.0101842	0.0537743	0.107429	-0.0424463	-0.0245545	-0.00225342	0.0310168	0.0568252
GO Term	Type 2 papillary renal cell carcinoma WP4241	Photodynamic therapy-induced HIF-1 survival signaling WP3614	MicroRNA for Targeting Cancer Growth and Vascularization in Glioblastoma WP3593	Pathways in clear cell renal cell carcinoma WP4018	Hereditary leiomyomatosis and renal cell carcinoma pathway WP4206
Adjusted P-Value	1.01364e-10	3.0392e-06	0.0005284	0.00208485	0.00255207
P-Value	4.05457e-12	2.43136e-07	6.34081e-05	0.000333577	0.000510415
54th TOP pathway, peak marker NAPRT	NAPRT	NMRK1	NMNAT1	QPRT	ZNF628	RUNDC1
Fold Change in COVID v Flu	-0.0942298	-0.0494761	-0.0344427	0.0548445	0.0750831	-0.0603209
GO Term	Tryptophan catabolism leading to NAD+ production WP4210	NAD+ biosynthetic pathways WP3645	NAD Biosynthesis II (from tryptophan) WP2485	NAD+ metabolism WP3644
Adjusted P-Value	1.21978e-10	4.01457e-07	1.4139e-05	0.0114483
P-Value	3.04946e-11	2.00728e-07	1.06043e-05	0.0114483
55th TOP pathway, peak marker EPHX2	EPHX2	ACAD11	CYP2J2	CYP4F2	CYP4F3	CYP4F12	CYP2U1
Fold Change in COVID v Flu	0.0782922	0.0603438	0.0772621	0.0320201	0.055781	-0.0112771	-0.010442
GO Term	Metapathway biotransformation Phase I and II WP702	Oxidation by Cytochrome P450 WP43	Arachidonate Epoxygenase / Epoxide Hydrolase WP678	Tryptophan metabolism WP465	Oxysterols derived from cholesterol WP4545
Adjusted P-Value	1.3478e-10	2.17595e-10	2.94482e-05	0.00114838	0.0154537
P-Value	3.85086e-11	3.1085e-11	1.26207e-05	0.000656215	0.0110383
56th TOP pathway, peak marker PPP2R5C	PPP2R5C	PPP2R1A	PPP2CA	PPP2R5D	LCMT1	PPP2R5B
Fold Change in COVID v Flu	-0.109099	0.00722589	0.0154087	0.00178103	0.00213606	0.0078898
GO Term	Glycogen Synthesis and Degradation WP500	PI3K-Akt Signaling Pathway WP4172	Focal Adhesion-PI3K-Akt-mTOR-signaling pathway WP3932	Wnt Signaling Pathway and Pluripotency WP399	Dopamine metabolism WP2436
Adjusted P-Value	1.5643e-10	1.44309e-06	1.63217e-06	0.00016326	0.024734
P-Value	1.42209e-11	3.93571e-07	2.96758e-07	5.93672e-05	0.0112427
57th TOP pathway, peak marker POLD2	POLD2	POLD3	POLDIP2	POLD1	NEXMIF
Fold Change in COVID v Flu	0.200516	-0.0395799	0.00308707	0.0501896	0.120195
GO Term	Homologous recombination WP186	DNA Replication WP466	Pyrimidine metabolism WP4022	DNA Mismatch Repair WP531	Nucleotide Metabolism WP404
Adjusted P-Value	1.82968e-10	1.29574e-08	1.34908e-07	0.0110565	0.0186157
P-Value	3.04946e-11	4.31915e-09	6.74541e-08	0.00737098	0.0155131
58th TOP pathway, peak marker RAD1	RAD1	SLC20A1	RAD9A	ERCC1	HUS1	HUS1B	ZBTB14	RAD9B
Fold Change in COVID v Flu	0.0897015	-0.0560855	-0.047384	-0.00267335	0.0150827	0.0188446	0.0539205	0.00122732
GO Term	ATR Signaling WP3875	miRNA Regulation of DNA Damage Response WP1530	DNA IR-damage and cellular response via ATR WP4016	DNA Damage Response WP707	ATM Signaling Pathway WP2516
Adjusted P-Value	1.87931e-10	6.21845e-05	7.28845e-05	8.5338e-05	0.0565581
P-Value	2.68473e-11	2.66505e-05	4.16483e-05	2.43823e-05	0.0403987
59th TOP pathway, peak marker BBS1	BBS1	BBS4	BBS2	BBS5	BBS9	ARL6	ARL6IP1
Fold Change in COVID v Flu	0.140298	-0.0720489	-0.0301886	0.0401793	0.0584299	0.116684	0.0059018
GO Term	Genes related to primary cilium development (based on CRISPR) WP4536	Ciliary landscape WP4352	Prader-Willi and Angelman Syndrome WP3998
Adjusted P-Value	1.93127e-10	1.09369e-06	0.0471023
P-Value	6.43757e-11	7.29124e-07	0.0471023
60th TOP pathway, peak marker TMEM67	TMEM67	CC2D2A	MKS1	TCTN2	TMEM216	B9D1
Fold Change in COVID v Flu	0.115873	-0.115538	0.0444369	0.0704012	0.0800597	0.101301
GO Term	Genes related to primary cilium development (based on CRISPR) WP4536	Ectoderm Differentiation WP2858	Ciliary landscape WP4352
Adjusted P-Value	1.93127e-10	0.202026	0.227454
P-Value	6.43757e-11	0.134684	0.227454
61th TOP pathway, peak marker EIF2B3	EIF2B3	EIF2B5	EIF2B1	EIF2B4	EIF2B2
Fold Change in COVID v Flu	0.0906418	0.00512563	0.0271815	0.0461374	0.0519866
GO Term	Translation Factors WP107	Rett syndrome causing genes WP4312	Factors and pathways affecting insulin-like growth factor (IGF1)-Akt signaling WP3850	MicroRNAs in cardiomyocyte hypertrophy WP1544
Adjusted P-Value	2.68785e-10	0.0578335	0.0588433	0.0756311
P-Value	6.71962e-11	0.0433751	0.0294216	0.0756311
62th TOP pathway, peak marker STX1A	STX1A	STXBP2	SNAP23	SNPH	STXBP1	SYT1	STXBP5	CPLX1	APBA2	SCAMP1	STON1	SLC17A7	SV2A	SYN1	SCAMP5
Fold Change in COVID v Flu	0.166193	-0.115181	-0.0339025	0.0411061	0.0610714	0.062028	0.0797567	-0.0603094	-0.0502494	-0.0213939	0.00506996	0.0329747	0.0568679	0.0591003	-0.0177441
GO Term	Synaptic Vesicle Pathway WP2267	Monoamine Transport WP727	Insulin Signaling WP481	Serotonin Transporter Activity WP1455	Lung fibrosis WP3624
Adjusted P-Value	2.82451e-10	0.00400646	0.00605093	0.041258	0.1097
P-Value	3.13835e-11	0.000890325	0.00201698	0.0183369	0.0853221
63th TOP pathway, peak marker PRKAR2B	PRKAR2B	AKAP10	AKAP1	PRKACB	PDE4B	PRKAR1A	PRKAR2A	TTF2	GPR161	PRKX
Fold Change in COVID v Flu	0.207669	-0.0977935	0.06386	0.130133	-0.0728804	-0.0706956	0.042001	0.0870757	-0.0375522	-0.0332358
GO Term	G Protein Signaling Pathways WP35	Lipid Metabolism Pathway WP3965	miRs in Muscle Cell Differentiation WP2012	Myometrial Relaxation and Contraction Pathways WP289	Cannabinoid receptor signaling WP3869
Adjusted P-Value	3.72081e-10	1.00449e-06	1.07306e-06	1.18925e-05	5.6702e-05
P-Value	1.61774e-11	1.3102e-07	9.33097e-08	2.06826e-06	1.23265e-05
64th TOP pathway, peak marker DLAT	DLAT	DLD	PDK3	PDHB	CS	PDHA1	PC	PDK2	PDP1	PDHX	PCK2	ME1
Fold Change in COVID v Flu	0.113202	-0.00609061	-0.000630564	0.0500779	0.0534286	0.0604569	-0.0524919	0.00656277	0.0141362	0.0208836	0.0123435	0.032596
GO Term	TCA Cycle and Deficiency of Pyruvate Dehydrogenase complex (PDHc) WP2453	Amino Acid metabolism WP3925	Glycolysis and Gluconeogenesis WP534	Hereditary leiomyomatosis and renal cell carcinoma pathway WP4206	TCA Cycle (aka Krebs or citric acid cycle) WP78
Adjusted P-Value	3.9509e-10	9.49354e-07	2.76319e-06	0.00244999	0.00274275
P-Value	1.64621e-11	7.91128e-08	3.45399e-07	0.000510415	0.000457125
65th TOP pathway, peak marker OXCT1	OXCT1	HMGCL	TMEM9	BDH1	BDH2
Fold Change in COVID v Flu	0.163634	-0.0714141	-0.0523504	0.106722	0.0483788
GO Term	Synthesis and Degradation of Ketone Bodies WP311	Amino Acid metabolism WP3925
Adjusted P-Value	4.15324e-10	0.0442895
P-Value	2.07662e-10	0.0442895
66th TOP pathway, peak marker B3GALNT1	B3GALNT1	GBGT1	A3GALT2	A4GALT
Fold Change in COVID v Flu	0.27708	-0.184344	-0.135224	0.00495279
GO Term	Globo Sphingolipid Metabolism WP1424	Ganglio Sphingolipid Metabolism WP1423	Metabolism of Spingolipids in ER and Golgi apparatus WP4142
Adjusted P-Value	4.95932e-10	0.00900342	0.009831
P-Value	1.65311e-10	0.00900342	0.006554
67th TOP pathway, peak marker RICTOR	RICTOR	PRR5	MAPKAP1	MTOR	MLST8	BOLA2-SMG1P6
Fold Change in COVID v Flu	-0.118193	-0.0872026	-0.0114389	-0.00491073	0.0470293	0.0103407
GO Term	Target Of Rapamycin (TOR) Signaling WP1471	Angiopoietin Like Protein 8 Regulatory Pathway WP3915	Interferon type I signaling pathways WP585	VEGFA-VEGFR2 Signaling Pathway WP3888	PI3K-AKT-mTOR signaling pathway and therapeutic opportunities WP3844
Adjusted P-Value	4.99047e-10	3.35343e-05	0.000191602	0.000217842	0.00324847
P-Value	1.03968e-11	1.39726e-06	1.19751e-05	1.81535e-05	0.000338382
68th TOP pathway, peak marker LMO2	LMO2	GATA1	NHLH1	LDB1	GATA2	TCF12	LDB2	TAL1	BEX2	IKZF1	NHLH2	KLF1	RUNX1T1	SSBP3	CBFA2T3	ZFPM1
Fold Change in COVID v Flu	-0.27557	-0.117484	-0.0480959	-0.0297231	0.00424438	0.0405311	0.0450792	0.0669377	0.131617	-0.0822082	-0.0667167	-0.0658983	-0.024202	0.00843342	0.0118888	0.0799354
GO Term	Hematopoietic Stem Cell Differentiation WP2849	Transcriptional cascade regulating adipogenesis WP4211	Prader-Willi and Angelman Syndrome WP3998	Wnt/beta-catenin Signaling Pathway in Leukemia WP3658	White fat cell differentiation WP4149
Adjusted P-Value	5.44413e-10	0.0732273	0.0997651	0.104319	0.104711
P-Value	5.44413e-11	0.0219682	0.0698356	0.0417278	0.0523555
69th TOP pathway, peak marker APH1B	APH1B	PSEN1	NCSTN	PSENEN	PSEN2
Fold Change in COVID v Flu	-0.195692	-0.086892	-0.0852718	-0.0485175	0.00601059
GO Term	Notch Signaling Pathway WP61	Notch Signaling WP268	Alzheimers Disease WP2059	Canonical and Non-canonical Notch signaling WP3845
Adjusted P-Value	6.69328e-10	4.74398e-08	3.41559e-07	0.000193084
P-Value	1.67332e-10	2.37199e-08	2.56169e-07	0.000193084
70th TOP pathway, peak marker MT-ND5	MT-ND5	MT-ND6	MT-ND3	MT-ND2	MT-ND4L
Fold Change in COVID v Flu	0.0770114	-0.0625907	-0.0433601	0.0149542	0.063446
GO Term	Oxidative phosphorylation WP623	Electron Transport Chain (OXPHOS system in mitochondria) WP111	Mitochondrial complex I assembly model OXPHOS system WP4324
Adjusted P-Value	7.17746e-10	4.69975e-09	7.76549e-08
P-Value	2.39249e-10	3.13316e-09	7.76549e-08
71th TOP pathway, peak marker SDHA	SDHA	SDHB	SDHAF2	SDHC	SDHD	SDHAF3	SDHAF1
Fold Change in COVID v Flu	0.0718334	-0.0381963	-0.0116677	0.0405989	0.0443199	-0.0206111	0.029952
GO Term	TCA Cycle (aka Krebs or citric acid cycle) WP78	Electron Transport Chain (OXPHOS system in mitochondria) WP111	Nonalcoholic fatty liver disease WP4396	TCA Cycle and Deficiency of Pyruvate Dehydrogenase complex (PDHc) WP2453	Metabolic reprogramming in colon cancer WP4290
Adjusted P-Value	7.83051e-10	4.8165e-07	1.27025e-06	0.0183934	0.0398992
P-Value	1.30508e-10	1.6055e-07	6.35125e-07	0.0122623	0.0332493
72th TOP pathway, peak marker PPP3CC	PPP3CC	PPP3R1	PPP3CA	PPP3CB	RCAN3	NFATC1	RCAN2	NIPAL3
Fold Change in COVID v Flu	0.0944444	-0.0843984	-0.0208656	0.032756	0.0471781	0.0727355	0.0130611	0.0302978
GO Term	Initiation of transcription and translation elongation at the HIV-1 LTR WP3414	Wnt Signaling WP428	Energy Metabolism WP1541	MAPK Signaling Pathway WP382	Alzheimers Disease WP2059
Adjusted P-Value	8.57799e-10	1.81877e-07	6.57097e-07	3.52124e-06	4.36738e-06
P-Value	3.72956e-11	1.58154e-08	8.57084e-08	7.65486e-07	7.59544e-07
73th TOP pathway, peak marker PCYT1B	PCYT1B	CEPT1	CHPT1	PCYT1A	LPCAT1	PLAAT3
Fold Change in COVID v Flu	0.267618	-0.0964518	-0.0817652	-0.0795775	-0.0243366	0.0259506
GO Term	Kennedy pathway from Sphingolipids WP3933	One carbon metabolism and related pathways WP3940	Glycerophospholipid Biosynthetic Pathway WP2533	MTHFR deficiency WP4288	Acetylcholine Synthesis WP528
Adjusted P-Value	9.13485e-10	6.43933e-08	0.000286217	0.000289625	0.00737401
P-Value	1.52248e-10	2.14644e-08	0.000143109	0.000193084	0.006145
74th TOP pathway, peak marker ASAH2	ASAH2	ACER1	CERK	GBA2
Fold Change in COVID v Flu	0.0810834	-0.0414768	-0.0281446	0.00480151
GO Term	Sphingolipid pathway WP1422	Integrated Breast Cancer Pathway WP1984
Adjusted P-Value	1.27523e-09	0.114621
P-Value	6.37615e-10	0.114621
75th TOP pathway, peak marker MTA3	MTA3	GATAD2B	MTA2	ZNF800	MBD3	GATAD2A	KAZALD1	LRRC42	MBD2
Fold Change in COVID v Flu	0.143972	-0.0382715	0.0119802	0.0414109	0.109906	-0.0389059	-0.0157602	0.0942263	-0.0333976
GO Term	The effect of progerin on the involved genes in Hutchinson-Gilford Progeria Syndrome WP4320	Cytosine methylation WP3585	Preimplantation Embryo WP3527
Adjusted P-Value	1.35959e-09	0.0110565	0.0292396
P-Value	4.53197e-10	0.00737098	0.0292396
76th TOP pathway, peak marker HADH	HADH	ECHS1	ACAT1	ECHDC2	SFXN3	ACADS	ACAD8	GCDH	MLYCD	ACADSB	AACS	SLC29A3
Fold Change in COVID v Flu	0.145044	0.0473541	0.0883359	0.119838	-0.0700577	-0.0434065	-0.0147063	0.0248277	0.038041	0.0456118	0.0593903	0.00712648
GO Term	Fatty Acid Beta Oxidation WP143	Tryptophan metabolism WP465	Fatty Acid Biosynthesis WP357	Mitochondrial LC-Fatty Acid Beta-Oxidation WP368	Synthesis and Degradation of Ketone Bodies WP311
Adjusted P-Value	1.39426e-09	2.70963e-07	8.29689e-06	0.000473285	0.0103257
P-Value	1.54918e-10	6.02139e-08	2.76563e-06	0.000210349	0.00573651
77th TOP pathway, peak marker TPO	TPO	TG	SLC5A5
Fold Change in COVID v Flu	-0.113456	0.0879375	0.0331433
GO Term	Thyroxine (Thyroid Hormone) Production WP1981	Development of pulmonary dendritic cells and macrophage subsets WP3892	Differentiation Pathway WP2848	Hematopoietic Stem Cell Differentiation WP2849	Amino Acid metabolism WP3925
Adjusted P-Value	1.45363e-09	0.0258037	0.0428473	0.0512266	0.0620053
P-Value	2.07662e-10	0.00737249	0.0183631	0.0292724	0.0442895
78th TOP pathway, peak marker POLR3G	POLR3G	POLR3H	POLR3E	POLR3F	POLR3K	FAM234A
Fold Change in COVID v Flu	0.20558	0.0274295	0.0313931	0.0792525	0.0468449	0.0109817
GO Term	Pyrimidine metabolism WP4022	Eukaryotic Transcription Initiation WP405
Adjusted P-Value	2.10621e-09	5.4696e-06
P-Value	1.0531e-09	5.4696e-06
79th TOP pathway, peak marker AP2A1	AP2A1	NECAP1	EPS15	AP2S1	NECAP2	AP2M1	SPART	KIAA0319	SH3BP4	AP2A2	SGIP1	FCHO1
Fold Change in COVID v Flu	-0.153483	-0.0713154	-0.0678471	-0.0667105	-0.0587148	-0.0354968	-0.0528598	-0.0198297	-0.0078187	-0.0054957	0.00760565	0.00991669
GO Term	GABA receptor Signaling WP4159	Synaptic Vesicle Pathway WP2267	EGF/EGFR Signaling Pathway WP437	Ebola Virus Pathway on Host WP4217	VEGFA-VEGFR2 Signaling Pathway WP3888
Adjusted P-Value	2.53224e-09	7.18962e-08	8.01676e-06	0.146599	0.202947
P-Value	5.06448e-10	2.87585e-08	4.81006e-06	0.117279	0.202947
80th TOP pathway, peak marker MOCS2	MOCS2	MOCS1	GPHN	ZDHHC12	MOCOS
Fold Change in COVID v Flu	0.110279	-0.0141812	0.103584	-0.0685396	0.0162472
GO Term	Molybdenum cofactor (Moco) biosynthesis WP4507	GABA receptor Signaling WP4159	Splicing factor NOVA regulated synaptic proteins WP4148
Adjusted P-Value	3.11493e-09	0.0156504	0.0244338
P-Value	1.03831e-09	0.0104336	0.0244338
81th TOP pathway, peak marker TNNI1	TNNI1	MYH7	MYH6	MYH3	TPM1
Fold Change in COVID v Flu	-0.0923301	-0.064742	-0.06419	0.00657233	0.0192577
GO Term	Striated Muscle Contraction Pathway WP383	Cardiac Progenitor Differentiation WP2406	Viral Acute Myocarditis WP4298	Vitamin D Receptor Pathway WP2877
Adjusted P-Value	3.49302e-09	0.0455961	0.0833822	0.0957316
P-Value	8.73255e-10	0.022798	0.0625367	0.0957316
82th TOP pathway, peak marker CPOX	CPOX	UROD	PPOX
Fold Change in COVID v Flu	0.035843	-0.00193748	0.0291522
GO Term	Heme Biosynthesis WP561
Adjusted P-Value	4.3609e-09
P-Value	4.3609e-09
83th TOP pathway, peak marker PHKA2	PHKA2	PHKG2	PHKB	PHKG1
Fold Change in COVID v Flu	-0.156554	-0.0267036	-0.0115233	-0.000103311
GO Term	Glycogen Synthesis and Degradation WP500	Type II diabetes mellitus WP1584
Adjusted P-Value	4.46629e-09	0.0138887
P-Value	2.23314e-09	0.0138887
84th TOP pathway, peak marker PLAU	PLAU	PLAUR	SERPINB6	SERPINE1	SERPINE2	PLAT	CTRC	SERPINF2
Fold Change in COVID v Flu	0.221561	-0.0986292	-0.0648345	0.109681	0.200989	-0.0767656	0.0680447	-0.0215024
GO Term	Complement and Coagulation Cascades WP558	Blood Clotting Cascade WP272	Senescence and Autophagy in Cancer WP615	Vitamin B12 Metabolism WP1533	Endochondral Ossification WP474
Adjusted P-Value	4.64165e-09	8.61683e-09	0.00112595	0.00498604	0.00651949
P-Value	1.71913e-10	6.38284e-10	0.000125105	0.000738673	0.00144878
85th TOP pathway, peak marker FASN	FASN	CCDC57	ACACB	AASDHPPT	ACACA	ACSS2	MID1IP1	ACYP2
Fold Change in COVID v Flu	0.132167	-0.0317068	0.0153419	0.0796357	0.108176	-0.106019	-0.0124591	0.00717638
GO Term	Fatty Acid Biosynthesis WP357	Lipid Metabolism Pathway WP3965	AMP-activated Protein Kinase (AMPK) Signaling WP1403	Pathways in clear cell renal cell carcinoma WP4018	Hereditary leiomyomatosis and renal cell carcinoma pathway WP4206
Adjusted P-Value	6.55165e-09	5.64909e-06	4.44733e-05	8.85105e-05	0.000361474
P-Value	3.11983e-10	5.38008e-07	6.35333e-06	1.68591e-05	8.60654e-05
86th TOP pathway, peak marker FGF2	FGF2	FLRT2	FGFR3	NES	GLG1	ANOS1	FGFBP3	FGFR4	FGFR1	FGFRL1	FGFBP2	FGFR2	KL	ZMYM2	FGF8
Fold Change in COVID v Flu	0.245544	-0.216455	-0.0927893	-0.0360291	-0.0205926	-0.00338966	0.0352791	0.0380607	0.0406494	0.0461948	0.0942557	0.104729	-0.00948381	0.00850664	0.0164347
GO Term	ESC Pluripotency Pathways WP3931	Regulation of Actin Cytoskeleton WP51	Neural Crest Differentiation WP2064	MAPK Signaling Pathway WP382	Focal Adhesion-PI3K-Akt-mTOR-signaling pathway WP3932
Adjusted P-Value	6.77425e-09	1.87784e-08	1.04361e-07	3.3331e-07	7.00857e-07
P-Value	1.88174e-10	1.04325e-09	8.69677e-09	3.70344e-08	9.73412e-08
87th TOP pathway, peak marker TALDO1	TALDO1	TKT	RPE
Fold Change in COVID v Flu	-0.0887773	-0.0821198	0.031484
GO Term	Pentose Phosphate Metabolism WP134	Metabolic reprogramming in colon cancer WP4290	Thiamine metabolic pathways WP4297	Cori Cycle WP1946
Adjusted P-Value	7.26817e-09	0.000412425	0.00655871	0.00798522
P-Value	1.81704e-09	0.000206212	0.00491903	0.00798522
88th TOP pathway, peak marker F5	F5	F2	SCCPDH	F2RL1	THBD	PROC	F13A1	F2R
Fold Change in COVID v Flu	-0.120022	-0.100323	0.0794513	-0.0226611	-0.0213429	0.0470037	0.0581777	0.0914365
GO Term	Complement and Coagulation Cascades WP558	Blood Clotting Cascade WP272	IL1 and megakaryocytes in obesity WP2865	Supression of HMGB1 mediated inflammation by THBD WP4479	Regulation of Actin Cytoskeleton WP51
Adjusted P-Value	9.56943e-09	0.00127787	0.00235393	0.0343133	0.0343493
P-Value	5.98089e-10	0.000159733	0.000441363	0.0128675	0.0107342
89th TOP pathway, peak marker CSTF3	CSTF3	CSTF2T	PAPOLA	CSTF2	ZC3H6	CSTF1
Fold Change in COVID v Flu	0.0590668	-0.0197513	0.0234773	0.041178	0.0478545	0.0507419
GO Term	mRNA Processing WP411
Adjusted P-Value	9.86299e-09
P-Value	9.86299e-09
90th TOP pathway, peak marker GAB2	GAB2	GRB2	A1BG	SOS2	SHC1	SHC3	GAB4	TESPA1	SOS1	INPPL1	PTPN12	ZNF8
Fold Change in COVID v Flu	-0.174672	-0.125822	0.00558588	-0.0609862	-0.0321176	-0.000914356	0.00721012	0.0260766	0.032937	-0.0225412	0.0176468	0.0116181
GO Term	EGF/EGFR Signaling Pathway WP437	Ras Signaling WP4223	Insulin Signaling WP481	ErbB Signaling Pathway WP673	BDNF-TrkB Signaling WP3676
Adjusted P-Value	1.30426e-08	4.6551e-07	5.49098e-07	9.91954e-07	1.39031e-06
P-Value	2.24873e-10	2.40781e-08	1.89344e-08	6.84106e-08	1.19854e-07
91th TOP pathway, peak marker TMIGD3	TMIGD3	P2RY14	P2RY13	P2RY12	P2RY4	TMEM119	SUCNR1	OLFML3
Fold Change in COVID v Flu	-0.584958	-0.361785	-0.247836	-0.129691	0.0511387	-0.0590929	0.244693	-0.0111414
GO Term	GPCRs, Class A Rhodopsin-like WP455	Nucleotide GPCRs WP80	GPCRs, Other WP117
Adjusted P-Value	1.33181e-08	0.0138092	0.0423838
P-Value	4.43937e-09	0.00920616	0.0423838
92th TOP pathway, peak marker TNFSF10	TNFSF10	TNFRSF10C	TNFRSF10D	TNFRSF10A	TNFRSF10B
Fold Change in COVID v Flu	-0.332268	-0.233807	-0.00416854	0.0366897	0.0686499
GO Term	Apoptosis Modulation and Signaling WP1772	Apoptosis WP254	miRNA regulation of p53 pathway in prostate cancer WP3982	TP53 Network WP1742	miRNA Regulation of DNA Damage Response WP1530
Adjusted P-Value	1.45677e-08	0.0127807	0.0503643	0.0550332	0.0774705
P-Value	1.61864e-09	0.00284016	0.0223841	0.0183444	0.0688627
93th TOP pathway, peak marker TYMS	TYMS	CDADC1	WDR45B	DHFR2	DCTD	DHFR	DUT	TK1	TK2	FPGS	DTYMK
Fold Change in COVID v Flu	0.386062	-0.0550777	-0.00104204	0.01817	0.0573043	0.127991	0.144463	0.316565	-0.0560535	0.0404164	0.137404
GO Term	Pyrimidine metabolism WP4022	Fluoropyrimidine Activity WP1601	Trans-sulfuration and one carbon metabolism WP2525	Disorders of Folate Metabolism and Transport WP4259	One Carbon Metabolism WP241
Adjusted P-Value	1.57267e-08	7.50207e-07	4.4398e-05	0.000594988	0.00178065
P-Value	1.31056e-09	1.25034e-07	1.10995e-05	0.000198329	0.000890325
94th TOP pathway, peak marker RBBP7	RBBP7	HAT1	CCDC71	BCL11A	CHD3	CHD4	HDAC1	HDAC2	SIRT2	WDR73	PRDM4	HDAC10	SNAI3	EHMT2	SP3	BAHD1	HOXA10
Fold Change in COVID v Flu	0.0725422	-0.0426233	-0.0367808	-0.00676955	-5.2892e-05	0.013177	0.0423594	0.0687695	-0.0381429	-0.0376395	-0.0214203	-0.0126648	-0.00395486	-0.00388663	0.00649429	0.0303987	0.0140801
GO Term	Ethanol effects on histone modifications WP3996	The effect of progerin on the involved genes in Hutchinson-Gilford Progeria Syndrome WP4320	Neural Crest Differentiation WP2064	Initiation of transcription and translation elongation at the HIV-1 LTR WP3414	Rett syndrome causing genes WP4312
Adjusted P-Value	1.68538e-08	2.69939e-08	0.00404418	0.0155832	0.0212228
P-Value	1.05336e-09	8.43559e-10	0.000379142	0.0019479	0.00397928
95th TOP pathway, peak marker JUN	JUN	MAPK10	BATF3	FOS	MAFB	BATF2	ATF3	ETS2	KLF6	ATF2	ETV5	EGR2	MAPK8	ZNF322	RNF187	MAPK9	NFATC2	MECOM	CEBPA	FOSB	TRIB1	JUNB	CREM	MAPK8IP3	EBF1	NFATC3	JUND	MTG1	EGR1
Fold Change in COVID v Flu	0.368994	-0.356046	-0.317134	-0.281365	-0.255995	-0.196393	-0.179671	-0.167807	-0.164003	-0.00442826	0.017993	0.0329396	0.0385001	0.0534604	0.0612401	0.065325	0.0962153	0.0981033	0.107839	0.19049	-0.0897561	-0.0525918	-0.0149752	-0.00209764	0.0106919	0.0151241	0.0328485	0.0374133	0.106372
GO Term	TGF-beta Signaling Pathway WP366	Oncostatin M Signaling Pathway WP2374	MAPK Signaling Pathway WP382	Structural Pathway of Interleukin 1 (IL-1) WP2637	Brain-Derived Neurotrophic Factor (BDNF) signaling pathway WP2380
Adjusted P-Value	1.91861e-08	1.60336e-05	2.02236e-05	4.91801e-05	5.08524e-05
P-Value	1.35113e-10	3.38737e-07	2.8484e-07	2.77071e-06	2.50681e-06
96th TOP pathway, peak marker ABCG2	ABCG2	ABCC1	ABCC2
Fold Change in COVID v Flu	-0.0613014	-0.0461366	-0.0251351
GO Term	Irinotecan Pathway WP229	Photodynamic therapy-induced NFE2L2 (NRF2) survival signaling WP3612	Codeine and Morphine Metabolism WP1604	Drug Induction of Bile Acid Pathway WP2289	Nuclear Receptors in Lipid Metabolism and Toxicity WP299
Adjusted P-Value	1.99875e-08	0.000320339	0.0112797	0.0152151	0.0168675
P-Value	1.81704e-09	5.82435e-05	0.00307629	0.00553277	0.0122673
97th TOP pathway, peak marker PPP2R1B	PPP2R1B	PPP2R5E	PPP2R5A	PPP2CB	PRR14
Fold Change in COVID v Flu	0.0802869	0.0547857	0.0740418	0.0793905	-0.0264813
GO Term	Glycogen Synthesis and Degradation WP500	PI3K-Akt Signaling Pathway WP4172	Focal Adhesion-PI3K-Akt-mTOR-signaling pathway WP3932	Wnt Signaling Pathway and Pluripotency WP399	Dopamine metabolism WP2436
Adjusted P-Value	2.00983e-08	2.27182e-05	2.72e-05	5.41557e-05	0.0135051
P-Value	2.23314e-09	7.57274e-06	6.04444e-06	2.40692e-05	0.00900342
98th TOP pathway, peak marker RAD50	RAD50	NBN	MRE11
Fold Change in COVID v Flu	0.0220496	-0.00616331	-0.00149698
GO Term	DDX1 as a regulatory component of the Drosha microprocessor WP2942	Homologous recombination WP186	ATM Signaling Pathway WP2516	ATM Signaling Network in Development and Disease WP3878	DNA IR-Double Strand Breaks (DSBs) and cellular response via ATM WP3959
Adjusted P-Value	2.18045e-08	8.9087e-08	2.0517e-06	2.21004e-06	3.09051e-06
P-Value	1.81704e-09	1.48478e-08	5.12925e-07	7.36681e-07	1.28771e-06
99th TOP pathway, peak marker KCNE1	KCNE1	KCNQ1	SMIM3	KCNH2	KCNH6
Fold Change in COVID v Flu	-0.401692	-0.0318273	0.0199705	0.171639	-0.133609
GO Term	Genes targeted by miRNAs in adipocytes WP1992	Sudden Infant Death Syndrome (SIDS) Susceptibility Pathways WP706	Hematopoietic Stem Cell Differentiation WP2849	VEGFA-VEGFR2 Signaling Pathway WP3888
Adjusted P-Value	3.42642e-08	0.0033201	0.0390298	0.12722
P-Value	8.56605e-09	0.00166005	0.0292724	0.12722
100th TOP pathway, peak marker TGFBR2	TGFBR2	TGFB1	TGFBR3	TGFB2
Fold Change in COVID v Flu	-0.118541	0.0183369	0.110242	0.117688
GO Term	Extracellular vesicle-mediated signaling in recipient cells WP2870	TGF-beta Receptor Signaling WP560	Nuclear Receptors Meta-Pathway WP2882	Chromosomal and microsatellite instability in colorectal cancer WP4216	Pancreatic adenocarcinoma pathway WP4263
Adjusted P-Value	3.66767e-08	7.672e-05	8.62796e-05	0.000143871	0.000198467
P-Value	7.48504e-10	3.13143e-06	5.28243e-06	1.17446e-05	2.02517e-05
101th TOP pathway, peak marker RIPK1	RIPK1	IKBKG	TRADD	TRAF2	TIFA	CYLD	USP48	ERC1
Fold Change in COVID v Flu	-0.131526	-0.0787941	0.022432	0.0567829	-0.044071	-0.00380185	0.0236435	0.0368093
GO Term	RIG-I-like Receptor Signaling WP3865	TNF alpha Signaling Pathway WP231	Apoptosis WP254	Regulation of toll-like receptor signaling pathway WP1449	p38 MAPK Signaling Pathway WP400
Adjusted P-Value	3.74031e-08	2.30906e-05	3.00539e-05	5.51715e-05	6.12468e-05
P-Value	7.48063e-10	1.38544e-06	1.20215e-06	4.41372e-06	6.12468e-06
102th TOP pathway, peak marker ENOPH1	ENOPH1	APIP	ADI1
Fold Change in COVID v Flu	0.0876725	0.0228827	0.065334
GO Term	Methionine De Novo and Salvage Pathway WP3580
Adjusted P-Value	5.03061e-08
P-Value	5.03061e-08
103th TOP pathway, peak marker PSMB9	PSMB9	PSMB8	PSMB10	PSME4	PSME2
Fold Change in COVID v Flu	-0.120201	-0.118903	-0.0359821	-0.0189752	-0.000156713
GO Term	Proteasome Degradation WP183	Type II interferon signaling (IFNG) WP619	The human immune response to tuberculosis WP4197
Adjusted P-Value	5.42851e-08	0.0252174	0.0281338
P-Value	1.8095e-08	0.0252174	0.0187559
104th TOP pathway, peak marker SQLE	SQLE	FAXDC2	FDFT1	LSS	ZNF134
Fold Change in COVID v Flu	0.211701	-0.145408	-0.0313122	0.0241316	0.012921
GO Term	Cholesterol Biosynthesis Pathway WP197	Sterol Regulatory Element-Binding Proteins (SREBP) signalling WP1982	Statin Pathway WP430
Adjusted P-Value	5.66917e-08	3.09242e-06	3.43141e-05
P-Value	1.88972e-08	2.06162e-06	3.43141e-05
105th TOP pathway, peak marker CTNNA1	CTNNA1	CTNNB1	LRATD2	LIMA1	TCF7L2	CA2	CSNK1A1	DVL3	CTNNBIP1	BCL9L	CDH3	MAGI2	TNIK	AXIN2	CDH6	BTRC	FER	AQP1	NLK	SLC4A8
Fold Change in COVID v Flu	-0.120039	-0.0613938	-0.0471775	0.0683646	-0.0573745	-0.0469875	-0.0363522	-0.0223923	-0.0164698	-0.004724	-4.38927e-05	0.00774813	0.0425661	0.0489882	0.0546713	0.0581753	0.0612918	-0.0297994	-0.0245355	-0.00493768
GO Term	LncRNA involvement in canonical Wnt signaling and colorectal cancer WP4258	Wnt Signaling Pathway WP363	ncRNAs involved in Wnt signaling in hepatocellular carcinoma WP4336	Wnt Signaling WP428	Neural Crest Differentiation WP2064
Adjusted P-Value	6.52753e-08	8.97256e-08	5.38452e-07	3.58092e-06	1.50735e-05
P-Value	9.89019e-10	2.71896e-09	2.44751e-08	2.17026e-07	1.14193e-06
106th TOP pathway, peak marker ACAA2	ACAA2	TMEM65	ACADVL	ACADM	CPT2	CPT1B
Fold Change in COVID v Flu	0.105464	-0.0764375	0.0433405	0.1037	-0.0384366	-0.0297867
GO Term	Fatty Acid Beta Oxidation WP143	Mitochondrial LC-Fatty Acid Beta-Oxidation WP368	PPAR signaling pathway WP3942	PPAR Alpha Pathway WP2878	Thermogenesis WP4321
Adjusted P-Value	6.68011e-08	1.44782e-06	2.26304e-05	0.000251378	0.0073935
P-Value	6.68011e-09	2.89564e-07	6.78913e-06	0.000100551	0.00369675
107th TOP pathway, peak marker PISD	PISD	PEMT	PTDSS1	PTDSS2
Fold Change in COVID v Flu	-0.0854534	0.0127068	0.0163579	0.0777655
GO Term	Kennedy pathway from Sphingolipids WP3933	Glycerophospholipid Biosynthetic Pathway WP2533	Acetylcholine Synthesis WP528	MTHFR deficiency WP4288	One carbon metabolism and related pathways WP3940
Adjusted P-Value	7.42391e-08	0.000107833	0.00615132	0.0168606	0.0250395
P-Value	1.48478e-08	4.3133e-05	0.00369079	0.0134885	0.0250395
108th TOP pathway, peak marker IDI1	IDI1	IPP	MVD	PMVK
Fold Change in COVID v Flu	-0.263232	-0.000681326	0.0878383	0.0161646
GO Term	Cholesterol Biosynthesis Pathway WP197	Mevalonate pathway WP3963	Sterol Regulatory Element-Binding Proteins (SREBP) signalling WP1982	Target Of Rapamycin (TOR) Signaling WP1471	Exercise-induced Circadian Regulation WP410
Adjusted P-Value	9.44862e-08	1.32644e-05	0.000816084	0.0252337	0.0268551
P-Value	1.88972e-08	5.30576e-06	0.000489651	0.020187	0.0268551
109th TOP pathway, peak marker ALG3	ALG3	ALG11	ALG12
Fold Change in COVID v Flu	0.0517244	0.020407	0.0365124
GO Term	Glycosylation and related congenital defects. WP4521
Adjusted P-Value	1.05077e-07
P-Value	1.05077e-07
110th TOP pathway, peak marker DPM2	DPM2	DPM1	DPM3
Fold Change in COVID v Flu	-0.327825	-0.00206581	0.0814905
GO Term	Glycosylation and related congenital defects. WP4521
Adjusted P-Value	1.05077e-07
P-Value	1.05077e-07
111th TOP pathway, peak marker SLC30A4	SLC30A4	SLC30A6	SLC30A1
Fold Change in COVID v Flu	0.073332	0.061791	0.0573405
GO Term	Zinc homeostasis WP3529
Adjusted P-Value	1.05077e-07
P-Value	1.05077e-07
112th TOP pathway, peak marker ASL	ASL	ASS1	CPS1	NMRAL1	TMEM116
Fold Change in COVID v Flu	-0.122336	0.0584902	-0.0514646	0.0265459	0.0435946
GO Term	Urea cycle and metabolism of amino groups WP497	Alanine and aspartate metabolism WP106	Amino Acid metabolism WP3925
Adjusted P-Value	1.05908e-07	1.70472e-05	0.000657975
P-Value	3.53025e-08	1.13648e-05	0.000657975
113th TOP pathway, peak marker PRKAB1	PRKAB1	PRKAG1	PRKAA1
Fold Change in COVID v Flu	-0.0370151	-0.0333015	-0.0210309
GO Term	Leptin and adiponectin WP3934	Hereditary leiomyomatosis and renal cell carcinoma pathway WP4206	Lipid Metabolism Pathway WP3965	Target Of Rapamycin (TOR) Signaling WP1471	Synaptic signaling pathways associated with autism spectrum disorder WP4539
Adjusted P-Value	1.09023e-07	6.28826e-07	1.12484e-06	1.77032e-06	3.0695e-06
P-Value	4.3609e-09	5.03061e-08	1.3498e-07	2.83251e-07	7.36681e-07
114th TOP pathway, peak marker CD19	CD19	FCRLA	CD79A	CD81	CR2	CD79B	PTGFRN
Fold Change in COVID v Flu	0.10738	-0.104851	-0.00784666	0.0460452	0.0659734	0.098053	0.0288785
GO Term	B Cell Receptor Signaling Pathway WP23	Human Complement System WP2806	Extracellular vesicles in the crosstalk of cardiac cells WP4300	Oxidative Damage WP3941	Complement and Coagulation Cascades WP558
Adjusted P-Value	1.10708e-07	0.00972018	0.0512748	0.0563328	0.0675994
P-Value	1.58154e-08	0.0027772	0.0219749	0.0482853	0.0482853
115th TOP pathway, peak marker BMP7	BMP7	BMPR2	KCP	NOG	ACVR1	GDF7	AMH
Fold Change in COVID v Flu	-0.10123	-0.0925917	-0.00799513	0.0761165	0.098191	-0.00260871	0.0487428
GO Term	Mesodermal Commitment Pathway WP2857	ESC Pluripotency Pathways WP3931	Bone Morphogenic Protein (BMP) Signalling and Regulation WP1425	Endoderm Differentiation WP2853	Role of Osx and miRNAs in tooth development WP3971
Adjusted P-Value	1.14295e-07	0.00030381	0.000392536	0.0224074	0.0382253
P-Value	6.72322e-09	5.36135e-05	4.61808e-05	0.00527233	0.0112427
116th TOP pathway, peak marker FZD1	FZD1	CSNK1G1	WNT6	WNT2B	WNT10B
Fold Change in COVID v Flu	-0.0620976	-0.0431752	-0.0411572	0.0118153	0.0322136
GO Term	Wnt Signaling in Kidney Disease WP4150	ncRNAs involved in Wnt signaling in hepatocellular carcinoma WP4336	LncRNA involvement in canonical Wnt signaling and colorectal cancer WP4258	Wnt Signaling Pathway and Pluripotency WP399	Wnt Signaling WP428
Adjusted P-Value	1.26922e-07	1.53671e-06	1.71225e-06	2.04133e-06	2.20937e-06
P-Value	6.68011e-09	1.61759e-07	2.70356e-07	5.37191e-07	6.97694e-07
117th TOP pathway, peak marker ALOX5	ALOX5	COTL1	ALOX5AP	LTC4S
Fold Change in COVID v Flu	-0.11566	-0.0959062	-0.0545635	0.0415714
GO Term	Eicosanoid Synthesis WP167	Selenium Micronutrient Network WP15	Vitamin D Receptor Pathway WP2877	Nuclear Receptors Meta-Pathway WP2882
Adjusted P-Value	1.4121e-07	0.00101075	0.0969157	0.137864
P-Value	3.53025e-08	0.000505376	0.0726868	0.137864
118th TOP pathway, peak marker STX3	STX3	VAMP3	VAMP2	TXLNA	SYT17	TXLNB	SYT11	SYT5	STX2	STX1B
Fold Change in COVID v Flu	-0.157503	-0.0800667	-0.0485784	0.0414985	0.0487217	-0.0339944	-0.00845203	-0.00431766	0.0225899	0.0459601
GO Term	Synaptic Vesicle Pathway WP2267	Splicing factor NOVA regulated synaptic proteins WP4148	Parkinsons Disease Pathway WP2371	Sudden Infant Death Syndrome (SIDS) Susceptibility Pathways WP706	Insulin Signaling WP481
Adjusted P-Value	1.43792e-07	0.0673311	0.0885537	0.141946	0.142992
P-Value	2.87585e-08	0.0403987	0.0354215	0.113556	0.142992
119th TOP pathway, peak marker TFRC	TFRC	HFE	TF	FTH1
Fold Change in COVID v Flu	0.116009	-0.0613766	0.00164478	0.0287223
GO Term	Iron metabolism in placenta WP2007	Ferroptosis WP4313	Hfe effect on hepcidin production WP3924	Differentiation Pathway WP2848	Sudden Infant Death Syndrome (SIDS) Susceptibility Pathways WP706
Adjusted P-Value	1.74248e-07	5.61779e-06	0.00765576	0.04272	0.107237
P-Value	2.48926e-08	1.60508e-06	0.00328104	0.0244114	0.0919177
120th TOP pathway, peak marker DDX58	DDX58	TRIM25	RNF135	NLRC5	MAVS	RNF125	USP25	C9orf78	TMEM230
Fold Change in COVID v Flu	-0.348483	-0.21137	-0.15379	-0.125343	-0.0341073	-0.0258094	0.084811	-0.14795	0.0810863
GO Term	RIG-I-like Receptor Signaling WP3865	Integrated Breast Cancer Pathway WP1984	Ebola Virus Pathway on Host WP4217
Adjusted P-Value	1.85825e-07	0.141175	0.175919
P-Value	6.19418e-08	0.141175	0.117279
121th TOP pathway, peak marker CEBPB	CEBPB	HSD17B11	KLF5	CEBPG
Fold Change in COVID v Flu	-0.234212	-0.11643	-0.078987	0.0550646
GO Term	Transcriptional cascade regulating adipogenesis WP4211	Differentiation of white and brown adipocyte WP2895	White fat cell differentiation WP4149	Adipogenesis WP236	Folate-Alcohol and Cancer Pathway Hypotheses WP1589
Adjusted P-Value	2.05585e-07	0.000308827	0.000613614	0.0061244	0.0177085
P-Value	1.14214e-08	3.43141e-05	0.000102269	0.00136098	0.00491903
122th TOP pathway, peak marker LDLR	LDLR	PCSK9	APOB	SREBF2	NPC1L1	COLEC12	PCSK7	INSIG2	MELTF	MBTPS2	INSIG1
Fold Change in COVID v Flu	0.160045	-0.097185	-0.0551745	0.11744	-0.115952	-0.0329877	0.00767878	0.00952569	0.0390885	0.0650105	0.0656968
GO Term	Sterol Regulatory Element-Binding Proteins (SREBP) signalling WP1982	Metabolic pathway of LDL, HDL and TG, including diseases WP4522	Composition of Lipid Particles WP3601	Statin Pathway WP430	SREBF and miR33 in cholesterol and lipid homeostasis WP2011
Adjusted P-Value	2.3428e-07	4.44624e-06	0.00010985	0.000887574	0.000979748
P-Value	1.67343e-08	6.35177e-07	2.35392e-05	0.000316991	0.000279928
123th TOP pathway, peak marker BCL10	BCL10	MALT1	CARD11	PRKCQ
Fold Change in COVID v Flu	-0.044672	0.0281135	0.0330468	0.0407356
GO Term	T-Cell antigen Receptor (TCR) pathway during Staphylococcus aureus infection WP3863	T-Cell antigen Receptor (TCR) Signaling Pathway WP69	B Cell Receptor Signaling Pathway WP23	MFAP5-mediated ovarian cancer cell motility and invasiveness WP3301	Ethanol metabolism resulting in production of ROS by CYP2E1 WP4269
Adjusted P-Value	2.50638e-07	6.90854e-07	0.000155977	0.0288109	0.0327498
P-Value	1.56648e-08	8.63567e-08	2.92457e-05	0.00900342	0.00818745
124th TOP pathway, peak marker ACTB	ACTB	CFL1	MYO1E	PFN1	ACTG1	WDR1	TESK2	SSH1	LIMK1
Fold Change in COVID v Flu	-0.0905837	-0.06638	-0.0479715	0.0366698	-0.0413546	-0.0403207	-0.0202133	0.0204758	0.0522787
GO Term	Regulation of Actin Cytoskeleton WP51	G13 Signaling Pathway WP524	Common Pathways Underlying Drug Addiction WP2636	Mechanoregulation and pathology of YAP/TAZ via Hippo and non-Hippo mechanisms WP4534	Pathogenic Escherichia coli infection WP2272
Adjusted P-Value	2.52903e-07	0.000290941	0.00783009	0.00879859	0.00942332
P-Value	1.2043e-08	2.77086e-05	0.00111858	0.00251388	0.00314111
125th TOP pathway, peak marker WASF1	WASF1	CYFIP1	BRK1	CYFIP2	ABI2	NCKAP1	WASF2	ABL1	FXR2	ABI1
Fold Change in COVID v Flu	0.301871	-0.0506627	0.00377068	0.00650578	0.14702	0.178324	-0.132777	0.000815955	0.00312061	-0.0703601
GO Term	Regulation of Actin Cytoskeleton WP51	Imatinib and Chronic Myeloid Leukemia WP3640	DNA IR-Double Strand Breaks (DSBs) and cellular response via ATM WP3959	Pathogenic Escherichia coli infection WP2272	Apoptosis-related network due to altered Notch3 in ovarian cancer WP2864
Adjusted P-Value	2.89032e-07	0.166003	0.176342	0.182428	0.184262
P-Value	1.2043e-08	0.0345839	0.0955186	0.0836127	0.092131
126th TOP pathway, peak marker LEO1	LEO1	CDC73	CTR9	RTF1	ZC3H18
Fold Change in COVID v Flu	0.0580669	-0.00821865	0.00919511	0.0560303	-0.055654
GO Term	Endoderm Differentiation WP2853
Adjusted P-Value	2.94853e-07
P-Value	2.94853e-07
127th TOP pathway, peak marker TTN	TTN	RBM20	TCAP	OBSCN	MYOM2	NEB	ANKRD23	SACS	TMOD4
Fold Change in COVID v Flu	0.176923	-0.0530486	-0.0284337	0.0598853	0.108429	0.109416	0.127409	0.167639	-0.00668618
GO Term	Striated Muscle Contraction Pathway WP383	Factors and pathways affecting insulin-like growth factor (IGF1)-Akt signaling WP3850
Adjusted P-Value	3.4015e-07	0.0177547
P-Value	1.70075e-07	0.0177547
128th TOP pathway, peak marker VPS16	VPS16	VPS41	VPS33A	VPS18	MALRD1
Fold Change in COVID v Flu	-0.071655	-0.0663945	-0.0360268	-0.0348326	0.0242242
GO Term	Ebola Virus Pathway on Host WP4217
Adjusted P-Value	3.5035e-07
P-Value	3.5035e-07
129th TOP pathway, peak marker IFT140	IFT140	IFT122	WDR35
Fold Change in COVID v Flu	0.0393083	-0.0238578	-0.0174848
GO Term	Intraflagellar transport proteins binding to dynein WP4532	Genes related to primary cilium development (based on CRISPR) WP4536	Ciliary landscape WP4352
Adjusted P-Value	3.58217e-07	1.25921e-05	0.00513973
P-Value	1.19406e-07	8.39473e-06	0.00513973
130th TOP pathway, peak marker CAMK2B	CAMK2B	CAMK2A	CAMK2G	CAMK2D	GRID1
Fold Change in COVID v Flu	-0.13822	-0.0878633	-0.00122343	0.0384434	-0.0381752
GO Term	NO/cGMP/PKG mediated Neuroprotection WP4008	Non-genomic actions of 1,25 dihydroxyvitamin D3 WP4341	ErbB Signaling Pathway WP673	Wnt Signaling WP428	Calcium Regulation in the Cardiac Cell WP536
Adjusted P-Value	3.6002e-07	1.6437e-06	2.96534e-06	4.01174e-06	5.56453e-06
P-Value	1.5653e-08	1.42931e-07	3.86783e-07	6.97694e-07	1.20968e-06
131th TOP pathway, peak marker CPSF4	CPSF4	SYMPK	CPSF1	FIP1L1	WDR33	CPSF2	PCF11	PAPOLG	CPSF3	SCAF8	RBBP6
Fold Change in COVID v Flu	0.0743669	-0.0232915	-0.0222366	0.00597179	0.0146317	0.0569579	-0.0442339	-0.0150997	0.0356183	-0.0147719	-0.0109489
GO Term	mRNA Processing WP411
Adjusted P-Value	4.00109e-07
P-Value	4.00109e-07
132th TOP pathway, peak marker GCLM	GCLM	GCLC	GSS	TXNDC12
Fold Change in COVID v Flu	0.169305	-0.071121	0.0625796	0.0030157
GO Term	Glutathione metabolism WP100	Trans-sulfuration and one carbon metabolism WP2525	Ferroptosis WP4313	One carbon metabolism and related pathways WP3940	Gamma-Glutamyl Cycle for the biosynthesis and degradation of glutathione, including diseases WP4518
Adjusted P-Value	4.01566e-07	1.14733e-06	2.28584e-06	2.35203e-06	8.59264e-06
P-Value	2.36215e-08	1.3498e-07	4.03383e-07	5.53419e-07	2.52725e-06
133th TOP pathway, peak marker PSAT1	PSAT1	PSPH	PHGDH	MN1
Fold Change in COVID v Flu	0.34413	0.16935	0.326698	0.0486487
GO Term	Trans-sulfuration and one carbon metabolism WP2525	Pathways in clear cell renal cell carcinoma WP4018	Metabolic reprogramming in colon cancer WP4290
Adjusted P-Value	4.04941e-07	6.39806e-06	0.000206212
P-Value	1.3498e-07	4.26538e-06	0.000206212
134th TOP pathway, peak marker SLC25A27	SLC25A27	UCP2	SLC25A14	UCP3
Fold Change in COVID v Flu	-0.0979162	-0.0797256	-0.0373085	-0.0233466
GO Term	Electron Transport Chain (OXPHOS system in mitochondria) WP111	Energy Metabolism WP1541	Exercise-induced Circadian Regulation WP410
Adjusted P-Value	4.8165e-07	0.000709302	0.0356492
P-Value	1.6055e-07	0.000472868	0.0356492
135th TOP pathway, peak marker CADM1	CADM1	EPB41L3	EPB41L2
Fold Change in COVID v Flu	0.270168	-0.25552	-0.087827
GO Term	Splicing factor NOVA regulated synaptic proteins WP4148
Adjusted P-Value	5.12925e-07
P-Value	5.12925e-07
136th TOP pathway, peak marker UBA2	UBA2	SUMO1	UBE2I	SAE1	PIAS3	TRIM27	SUMO4	RWDD3	DAXX	RGPD1	RGPD3	MBD1	PIAS4	SENP1	NFATC2IP	SUMO2	TLCD4-RWDD3
Fold Change in COVID v Flu	0.103739	0.0228204	0.0552903	0.0564841	-0.0527294	-0.0409575	-0.02993	-0.0146066	-0.00865397	-0.00500651	-0.0044151	-0.00352832	0.00904427	0.00987419	0.0148268	0.0211594	-0.00908468
GO Term	Androgen receptor signaling pathway WP138	TGF-beta Signaling Pathway WP366	Exercise-induced Circadian Regulation WP410	Interleukin-11 Signaling Pathway WP2332	Interferon type I signaling pathways WP585
Adjusted P-Value	5.28699e-07	0.102386	0.109454	0.114952	0.118004
P-Value	3.30437e-08	0.0127982	0.061568	0.057476	0.0737528
137th TOP pathway, peak marker CCR5	CCR5	CCL4	CCL5	CCR8	CX3CR1	CXCR5
Fold Change in COVID v Flu	-0.104716	0.0714766	0.0800831	-0.0468335	-0.0365242	0.0360382
GO Term	Peptide GPCRs WP24	Chemokine signaling pathway WP3929	GPCRs, Class A Rhodopsin-like WP455	Selective expression of chemokine receptors during T-cell polarization WP4494	Lung fibrosis WP3624
Adjusted P-Value	5.30508e-07	6.86502e-07	1.63864e-05	0.00126467	0.0044493
P-Value	3.31567e-08	8.58127e-08	3.07244e-06	0.000316167	0.00139041
138th TOP pathway, peak marker GAMT	GAMT	SLC6A8	GATM	METTL25	CKB
Fold Change in COVID v Flu	0.126306	-0.0146036	0.0171717	0.0427182	0.103417
GO Term	Urea cycle and metabolism of amino groups WP497	MECP2 and Associated Rett Syndrome WP3584	NRF2 pathway WP2884	Nuclear Receptors Meta-Pathway WP2882
Adjusted P-Value	5.63622e-07	0.084054	0.115411	0.179474
P-Value	1.40906e-07	0.042027	0.086558	0.179474
139th TOP pathway, peak marker CYB5A	CYB5A	CYB5R3	CYB5B
Fold Change in COVID v Flu	0.059744	-0.0338862	0.0140609
GO Term	Oxidation by Cytochrome P450 WP43	The alternative pathway of fetal androgen synthesis WP4524	Classical pathway of steroidogenesis, including diseases WP4523
Adjusted P-Value	5.69097e-07	0.0027698	0.00369079
P-Value	1.89699e-07	0.00184653	0.00369079
140th TOP pathway, peak marker PTGES	PTGES	PTGS2	PTGDS
Fold Change in COVID v Flu	0.107551	0.074272	-0.0527372
GO Term	Eicosanoid Synthesis WP167	Prostaglandin Synthesis and Regulation WP98	Photodynamic therapy-induced NF-kB survival signaling WP3617	Aryl Hydrocarbon Receptor WP2586	Hepatitis C and Hepatocellular Carcinoma WP3646
Adjusted P-Value	6.70748e-07	2.95129e-06	0.0523672	0.0528613	0.053322
P-Value	3.53025e-08	3.10662e-07	0.016537	0.0250395	0.0280642
141th TOP pathway, peak marker LAMB1	LAMB1	LAMA5	BCAM	LAMC1	PDZD4
Fold Change in COVID v Flu	-0.11954	0.083389	-0.0516122	-0.0415253	-0.0350102
GO Term	Inflammatory Response Pathway WP453	Alpha 6 Beta 4 signaling pathway WP244	Human Complement System WP2806	Focal Adhesion WP306	PI3K-Akt Signaling Pathway WP4172
Adjusted P-Value	8.27481e-07	1.05012e-06	7.80539e-06	0.000113536	0.000217746
P-Value	9.19423e-08	2.3336e-07	2.6018e-06	5.04603e-05	0.000145164
142th TOP pathway, peak marker C1QA	C1QA	C1QB	MARCO	C1QC	SLCO2B1
Fold Change in COVID v Flu	-0.674126	-0.640068	-0.364218	-0.569999	-0.2458
GO Term	Complement Activation WP545	Oxidative Damage WP3941	Complement and Coagulation Cascades WP558	Microglia Pathogen Phagocytosis Pathway WP3937	Allograft Rejection WP2328
Adjusted P-Value	8.48804e-07	4.59001e-06	6.12002e-06	7.22287e-06	1.40083e-05
P-Value	9.43115e-08	2.04001e-06	2.04001e-06	1.60508e-06	7.7824e-06
143th TOP pathway, peak marker SELENOS	SELENOS	SELENOK	SELENOO	PGPEP1
Fold Change in COVID v Flu	0.124589	-0.108014	0.0161152	-0.000960774
GO Term	Selenium Metabolism and Selenoproteins WP28	Selenium Micronutrient Network WP15
Adjusted P-Value	8.75918e-07	2.16301e-06
P-Value	4.37959e-07	2.16301e-06
144th TOP pathway, peak marker SEPSECS	SEPSECS	PSTK	SEPHS2
Fold Change in COVID v Flu	0.072791	0.00756235	0.0261286
GO Term	Selenium Metabolism and Selenoproteins WP28	Selenium Micronutrient Network WP15
Adjusted P-Value	8.75918e-07	0.0389013
P-Value	4.37959e-07	0.0389013
145th TOP pathway, peak marker BABAM2	BABAM2	UIMC1	BABAM1	ABRAXAS1	BRCC3	BRCA1	LUZP1	HMBOX1
Fold Change in COVID v Flu	-0.0681571	-0.0499053	-0.00464601	0.00670351	0.0311036	-0.0433649	0.0135072	0.0211939
GO Term	DNA IR-damage and cellular response via ATR WP4016	miRNA Regulation of DNA Damage Response WP1530	Androgen receptor signaling pathway WP138	Signaling Pathways in Glioblastoma WP2261	DNA Damage Response WP707
Adjusted P-Value	8.76903e-07	0.0901466	0.0904265	0.0925897	0.1001
P-Value	6.74541e-08	0.0554748	0.0695588	0.0641006	0.0539001
146th TOP pathway, peak marker ATG101	ATG101	ATG13	ULK1	RB1CC1
Fold Change in COVID v Flu	0.0632736	-0.0547223	0.0612502	0.0148422
GO Term	PI3K-AKT-mTOR signaling pathway and therapeutic opportunities WP3844	Senescence and Autophagy in Cancer WP615	Nanoparticle triggered autophagic cell death WP2509	Target Of Rapamycin (TOR) Signaling WP1471	Focal Adhesion-PI3K-Akt-mTOR-signaling pathway WP3932
Adjusted P-Value	9.48496e-07	1.62989e-05	0.0214633	0.0252337	0.142319
P-Value	1.89699e-07	6.51955e-06	0.012878	0.020187	0.142319
147th TOP pathway, peak marker SRM	SRM	SAT2	AMD1	VIT	MTAP
Fold Change in COVID v Flu	0.25478	-0.176754	0.0258762	0.0607311	0.10767
GO Term	Methionine De Novo and Salvage Pathway WP3580	Nucleotide Metabolism WP404	Urea cycle and metabolism of amino groups WP497	Ferroptosis WP4313	Amino Acid metabolism WP3925
Adjusted P-Value	1.00364e-06	0.0258551	0.0347217	0.0375531	0.0586183
P-Value	2.00728e-07	0.0155131	0.0138887	0.0300425	0.0586183
148th TOP pathway, peak marker MSRA	MSRA	RP1L1	MSRB2
Fold Change in COVID v Flu	-0.108343	-0.0797214	0.0592462
GO Term	Sulindac Metabolic Pathway WP2542	Methionine De Novo and Salvage Pathway WP3580
Adjusted P-Value	1.01131e-06	1.44112e-05
P-Value	5.05657e-07	1.44112e-05
149th TOP pathway, peak marker ZFYVE9	ZFYVE9	SMAD3	SMAD2	PTPN14	RUNX2	TGIF2	TRPS1
Fold Change in COVID v Flu	0.144832	-0.112401	0.0129467	-0.0478397	-0.0342717	0.0510071	0.0134379
GO Term	TGF-beta Receptor Signaling WP560	TGF-B Signaling in Thyroid Cells for Epithelial-Mesenchymal Transition WP3859	Hypothesized Pathways in Pathogenesis of Cardiovascular Disease WP3668	TGF-beta Signaling Pathway WP366	Tgif disruption of Shh signaling WP3674
Adjusted P-Value	1.10588e-06	3.76549e-06	7.32429e-06	1.67331e-05	8.07722e-05
P-Value	3.45589e-08	2.35343e-07	6.86652e-07	2.09164e-06	1.26207e-05
150th TOP pathway, peak marker IFNAR2	IFNAR2	IFNAR1	TYK2
Fold Change in COVID v Flu	-0.0556321	-0.0545421	-0.0379014
GO Term	The human immune response to tuberculosis WP4197	Interferon type I signaling pathways WP585	Toll-like Receptor Signaling Pathway WP75	Regulation of toll-like receptor signaling pathway WP1449	Type III interferon signaling WP2113
Adjusted P-Value	1.19525e-06	7.90512e-06	0.00368695	0.00539516	0.0111931
P-Value	9.19423e-08	1.21617e-06	0.000850835	0.00166005	0.00430504
151th TOP pathway, peak marker NCF2	NCF2	NCF1	CYBA	CYBB	NRROS	NOXA1	TRPM2
Fold Change in COVID v Flu	-0.182239	-0.0984432	-0.0501872	-0.0355786	-0.0140556	-0.00814784	0.00608974
GO Term	Microglia Pathogen Phagocytosis Pathway WP3937	TYROBP Causal Network WP3945	Brain-Derived Neurotrophic Factor (BDNF) signaling pathway WP2380	Type II interferon signaling (IFNG) WP619	Oxidative Stress WP408
Adjusted P-Value	1.26091e-06	0.0195673	0.0633038	0.0947384	0.0956432
P-Value	9.6993e-08	0.00301035	0.0146086	0.0437254	0.0367858
152th TOP pathway, peak marker FTO	FTO	IRX3
Fold Change in COVID v Flu	0.0788066	-0.0649504
GO Term	FTO Obesity Variant Mechanism WP3407
Adjusted P-Value	1.26414e-06
P-Value	1.26414e-06
153th TOP pathway, peak marker WAS	WAS	WIPF1	CDC42	WHAMM	RAC1	NCK1	MAP3K11	MAP4K4	TIAM2	FAM13B	OPHN1	BNIP2	PAK2	ARHGAP32	ARHGAP31	PARD6A	PAK3	SOCS6	PAK4	ARHGEF9	DOCK6	PAK6	WASL	DOCK10	ARHGAP33	MYO9A	C14orf28	BAIAP2L1
Fold Change in COVID v Flu	-0.147827	-0.0984705	-0.0598466	-0.017493	0.0156901	0.0763855	-0.0585144	-0.0579231	-0.0504406	-0.0458988	-0.0267279	-0.0170359	-0.0160337	-0.00284003	0.0100983	0.0172202	0.0200666	0.0260053	0.035468	0.0359921	0.0405539	0.0445201	0.0457028	0.0557507	0.0585313	0.059595	0.0430975	0.0444083
GO Term	MET in type 1 papillary renal cell carcinoma WP4205	Regulation of Actin Cytoskeleton WP51	G13 Signaling Pathway WP524	Pancreatic adenocarcinoma pathway WP4263	Mechanoregulation and pathology of YAP/TAZ via Hippo and non-Hippo mechanisms WP4534
Adjusted P-Value	1.26815e-06	1.95886e-06	1.98539e-06	3.60824e-06	3.84592e-06
P-Value	1.76132e-08	5.44128e-08	8.27247e-08	2.50572e-07	2.13662e-07
154th TOP pathway, peak marker NDUFAF4	NDUFAF4	NDUFAF3	NDUFAF2	NDUFAF5
Fold Change in COVID v Flu	0.165234	0.0788657	0.103568	0.0437672
GO Term	Mitochondrial complex I assembly model OXPHOS system WP4324
Adjusted P-Value	1.4391e-06
P-Value	1.4391e-06
155th TOP pathway, peak marker DMD	DMD	SNTB1	SNTB2	SGCD	SNTA1	DAG1	LAMA2	SGCE
Fold Change in COVID v Flu	-0.102228	-0.0836403	-0.0817302	-0.0390247	0.0140635	0.0235066	-0.0145038	-0.0078404
GO Term	Arrhythmogenic Right Ventricular Cardiomyopathy WP2118	Viral Acute Myocarditis WP4298	Alpha 6 Beta 4 signaling pathway WP244	Striated Muscle Contraction Pathway WP383	Primary Focal Segmental Glomerulosclerosis FSGS WP2572
Adjusted P-Value	1.47573e-06	1.65267e-06	0.0864185	0.104202	0.147228
P-Value	1.34157e-07	3.00485e-07	0.0314249	0.0284188	0.0669216
156th TOP pathway, peak marker GSPT1	GSPT1	UPF1	SMG1	PABPC1	ETF1	STAU1	CASC3	SMG7	UPF2	RBM8A	DEK	DHX34	PAIP1	UPF3B	EIF4A3	PAIP2	SMG6	MAGOH	RNPS1	JPT2	UPF3A	GSPT2	SMG5	SRSF4	PYM1	SOWAHC	CFAP44	ZCWPW2
Fold Change in COVID v Flu	-0.175973	-0.160426	-0.00220633	0.0184301	0.0301897	-0.102221	-0.0984763	-0.0799866	-0.0624821	-0.0444445	-0.0353413	-0.0333897	0.00620765	0.0102389	0.0119835	0.0143153	0.0185396	0.024712	0.0351303	0.101211	0.110804	0.119186	-0.0292836	0.00246266	0.00557157	0.026202	0.0993669	-0.0937673
GO Term	Translation Factors WP107	mRNA Processing WP411	DNA IR-damage and cellular response via ATR WP4016	DNA IR-Double Strand Breaks (DSBs) and cellular response via ATM WP3959	Endoderm Differentiation WP2853
Adjusted P-Value	1.5639e-06	0.037232	0.131396	0.150196	0.154067
P-Value	2.60649e-07	0.0124107	0.109497	0.0750982	0.154067
157th TOP pathway, peak marker STAT5A	STAT5A	JAK2	JAK3	STAT5B	SH2B3	SH2B1	EPOR	STAT4
Fold Change in COVID v Flu	-0.131885	-0.0995557	-0.088636	-0.0892052	-0.030558	-0.0286881	-0.0168732	0.0146985
GO Term	EPO Receptor Signaling WP581	Thymic Stromal LymphoPoietin (TSLP) Signaling Pathway WP2203	IL-4 Signaling Pathway WP395	IL-9 Signaling Pathway WP22	IL-7 Signaling Pathway WP205
Adjusted P-Value	1.60165e-06	7.72033e-06	1.12237e-05	1.12801e-05	4.97919e-05
P-Value	3.72477e-08	3.59085e-07	7.83049e-07	1.04931e-06	5.78976e-06
158th TOP pathway, peak marker ENO3	ENO3	PGAM2	PGAM1
Fold Change in COVID v Flu	0.139866	0.0311553	0.0496351
GO Term	Glycolysis and Gluconeogenesis WP534	Cori Cycle WP1946	Metabolic reprogramming in colon cancer WP4290	Pathways in clear cell renal cell carcinoma WP4018
Adjusted P-Value	1.61353e-06	0.0159704	0.0333861	0.0484664
P-Value	4.03383e-07	0.00798522	0.0250395	0.0484664
159th TOP pathway, peak marker GGCT	GGCT	OPLAH
Fold Change in COVID v Flu	0.0320531	0.00028438
GO Term	Gamma-Glutamyl Cycle for the biosynthesis and degradation of glutathione, including diseases WP4518	Glutathione metabolism WP100
Adjusted P-Value	1.68552e-06	0.00614879
P-Value	8.42761e-07	0.00614879
160th TOP pathway, peak marker E2F5	E2F5	TFDP1	RBL1	E2F4
Fold Change in COVID v Flu	0.21175	0.0424762	0.0899491	-0.0294569
GO Term	TGF-beta Signaling Pathway WP366	Cell Cycle WP179	Adipogenesis WP236	ID signaling pathway WP53	Preimplantation Embryo WP3527
Adjusted P-Value	1.70755e-06	2.6183e-06	0.00715638	0.0228966	0.0467833
P-Value	4.26887e-07	3.27288e-07	0.00268364	0.0114483	0.0292396
161th TOP pathway, peak marker DGCR8	DGCR8	DROSHA
Fold Change in COVID v Flu	0.0474803	0.000318438
GO Term	DDX1 as a regulatory component of the Drosha microprocessor WP2942	miRNA Biogenesis WP2338	exRNA mechanism of action and biogenesis WP2805
Adjusted P-Value	1.7698e-06	1.89621e-06	3.79243e-06
P-Value	1.7698e-06	1.26414e-06	1.26414e-06
162th TOP pathway, peak marker GUCY1B1	GUCY1B1	PDE9A	GUCY1A1	ANKMY2
Fold Change in COVID v Flu	0.173945	-0.0404031	0.0841157	0.0205666
GO Term	Phosphodiesterases in neuronal function WP4222	NO/cGMP/PKG mediated Neuroprotection WP4008	Myometrial Relaxation and Contraction Pathways WP289
Adjusted P-Value	1.78797e-06	0.000265294	0.0732724
P-Value	5.9599e-07	0.000176862	0.0732724
163th TOP pathway, peak marker MTR	MTR	MTHFR	MTRR
Fold Change in COVID v Flu	0.04333	0.00387269	0.0273107
GO Term	One Carbon Metabolism WP241	Vitamin B12 Metabolism WP1533	Folate Metabolism WP176	Folate-Alcohol and Cancer Pathway Hypotheses WP1589	Vitamin B12 Disorders WP4271
Adjusted P-Value	1.91049e-06	2.71829e-06	4.78896e-06	2.82935e-05	4.44369e-05
P-Value	1.19406e-07	3.39787e-07	8.9793e-07	7.07338e-06	1.66638e-05
164th TOP pathway, peak marker MUC5AC	MUC5AC	ADGRE3	MUC1	ST6GALNAC2	ST6GALNAC4	GALNT2	GALNT10
Fold Change in COVID v Flu	-0.116257	0.0333307	0.0897502	-0.0537416	-0.0535302	-0.0357865	-0.0162919
GO Term	Globo Sphingolipid Metabolism WP1424	Role Altered Glycolysation of MUC1 in Tumour Microenvironment WP4480	Hematopoietic Stem Cell Differentiation WP2849	GPCRs, Other WP117
Adjusted P-Value	2.00234e-06	0.0163732	0.0483194	0.0565117
P-Value	5.00584e-07	0.00818661	0.0483194	0.0423838
165th TOP pathway, peak marker FDX1	FDX1	CYP11A1	FDXR	CYP21A2	AEN
Fold Change in COVID v Flu	0.0864371	-0.0837497	-0.0738594	-0.00658665	0.0230662
GO Term	Glucocorticoid and Mineralcorticoid Metabolism WP237	Classical pathway of steroidogenesis, including diseases WP4523	Corticotropin-releasing hormone signaling pathway WP2355	Metapathway biotransformation Phase I and II WP702	The alternative pathway of fetal androgen synthesis WP4524
Adjusted P-Value	2.02263e-06	1.51614e-05	0.00200359	0.0020906	0.00295445
P-Value	2.52828e-07	3.79035e-06	0.000751345	0.0010453	0.00184653
166th TOP pathway, peak marker GYS1	GYS1	GBE1	PYGM
Fold Change in COVID v Flu	0.0698987	0.015743	-0.00259008
GO Term	Glycogen Synthesis and Degradation WP500	AMP-activated Protein Kinase (AMPK) Signaling WP1403	Insulin Signaling WP481	Angiopoietin Like Protein 8 Regulatory Pathway WP3915	PI3K-Akt Signaling Pathway WP4172
Adjusted P-Value	2.03872e-06	0.105894	0.132615	0.137162	0.150079
P-Value	3.39787e-07	0.035298	0.0884102	0.0685811	0.150079
167th TOP pathway, peak marker RRM2	RRM2	CELF3	RRM1	RRM2B
Fold Change in COVID v Flu	0.420466	-0.153891	0.139486	-0.00666124
GO Term	Nucleotide Metabolism WP404	Pyrimidine metabolism WP4022	Fluoropyrimidine Activity WP1601	Retinoblastoma Gene in Cancer WP2446	Pyrimidine metabolism and related diseases WP4225
Adjusted P-Value	2.20801e-06	9.27253e-05	0.000747201	0.00508179	0.0126203
P-Value	2.00728e-07	1.68591e-05	0.000203782	0.00184792	0.00573651
168th TOP pathway, peak marker RRAGB	RRAGB	RRAGC	LAMTOR5	LAMTOR2	LAMTOR3	RRAGA	LAMTOR4	SLC38A9	DEPDC5	LAMTOR1
Fold Change in COVID v Flu	-0.0614406	-0.0588254	-0.0441863	-0.0246542	-0.020274	-0.0146205	0.000278217	0.0113593	0.0233431	0.0475674
GO Term	Target Of Rapamycin (TOR) Signaling WP1471	MAPK Signaling Pathway WP382
Adjusted P-Value	2.25554e-06	0.159469
P-Value	1.12777e-06	0.159469
169th TOP pathway, peak marker SULT1A2	SULT1A2	SULT1A1
Fold Change in COVID v Flu	0.0535281	-0.00441221
GO Term	Arylamine metabolism WP694	Sulfation Biotransformation Reaction WP692	Metapathway biotransformation Phase I and II WP702	Tamoxifen metabolism WP691	Estrogen metabolism WP697
Adjusted P-Value	2.27546e-06	1.06188e-05	0.00105834	0.00369344	0.00516923
P-Value	2.52828e-07	2.35973e-06	0.00035278	0.00164153	0.00287179
170th TOP pathway, peak marker HEXA	HEXA	GM2A	HEXB
Fold Change in COVID v Flu	-0.0756374	-0.0229541	-0.0171006
GO Term	Degradation pathway of sphingolipids, including diseases WP4153
Adjusted P-Value	2.35973e-06
P-Value	2.35973e-06
171th TOP pathway, peak marker TUBA1A	TUBA1A	CAMSAP1	TUBA1B	TUBB4B
Fold Change in COVID v Flu	-0.264281	0.0238529	0.0573629	0.0361515
GO Term	Pathogenic Escherichia coli infection WP2272	Parkin-Ubiquitin Proteasomal System pathway WP2359	Allograft Rejection WP2328
Adjusted P-Value	2.52543e-06	2.66482e-06	0.0377012
P-Value	8.4181e-07	1.77655e-06	0.0377012
172th TOP pathway, peak marker AKR1C3	AKR1C3	AKR1C1
Fold Change in COVID v Flu	0.0585548	0.0509382
GO Term	Benzo(a)pyrene metabolism WP696	Prostaglandin Synthesis and Regulation WP98	Metapathway biotransformation Phase I and II WP702
Adjusted P-Value	2.52828e-06	7.09184e-05	0.00035278
P-Value	8.42761e-07	4.72789e-05	0.00035278
173th TOP pathway, peak marker CETP	CETP	LCAT
Fold Change in COVID v Flu	0.145612	0.0447618
GO Term	Composition of Lipid Particles WP3601	Metabolic pathway of LDL, HDL and TG, including diseases WP4522	Statin Pathway WP430
Adjusted P-Value	2.52828e-06	8.34334e-06	1.14616e-05
P-Value	8.42761e-07	5.56222e-06	1.14616e-05
174th TOP pathway, peak marker SERPING1	SERPING1	F12	KLKB1	PRCP
Fold Change in COVID v Flu	-0.347618	0.0231476	0.103286	-0.0100994
GO Term	Complement and Coagulation Cascades WP558	Human Complement System WP2806	Blood Clotting Cascade WP272	miRNA regulation of prostate cancer signaling pathways WP3981	Androgen receptor signaling pathway WP138
Adjusted P-Value	2.56462e-06	6.50449e-06	3.82826e-05	0.0252337	0.0526311
P-Value	5.12925e-07	2.6018e-06	2.29696e-05	0.020187	0.0526311
175th TOP pathway, peak marker PPARGC1A	PPARGC1A	ESRRA	PPARA	PPARG	ZNF467	PAX8	FAM120B	ABCB4
Fold Change in COVID v Flu	-0.175212	-0.0465137	0.0383765	0.159561	-0.142865	-0.0541045	-0.0441449	-0.0154078
GO Term	Energy Metabolism WP1541	Nuclear Receptors in Lipid Metabolism and Toxicity WP299	Nuclear Receptors WP170	Farnesoid X Receptor Pathway WP2879	Transcription factor regulation in adipogenesis WP3599
Adjusted P-Value	2.82838e-06	1.93776e-05	5.06779e-05	0.000291059	0.000785266
P-Value	8.57084e-08	1.1744e-06	4.60708e-06	3.52798e-05	0.000214163
176th TOP pathway, peak marker RARA	RARA	RXRA	RXRB
Fold Change in COVID v Flu	-0.192381	-0.0543462	-0.0258276
GO Term	Nuclear Receptors WP170	Vitamin A and Carotenoid Metabolism WP716	Vitamin D Metabolism WP1531	PPAR signaling pathway WP3942	Non-genomic actions of 1,25 dihydroxyvitamin D3 WP4341
Adjusted P-Value	2.917e-06	2.98514e-06	4.42147e-05	0.00148625	0.00217228
P-Value	2.3336e-07	1.19406e-07	5.30576e-06	0.000237801	0.000521348
177th TOP pathway, peak marker HMBS	HMBS	ALAD
Fold Change in COVID v Flu	-0.0258699	-0.00546488
GO Term	Heme Biosynthesis WP561
Adjusted P-Value	3.03394e-06
P-Value	3.03394e-06
178th TOP pathway, peak marker CFH	CFH	C3	ZBTB41	CD46
Fold Change in COVID v Flu	0.146756	0.064974	0.0851355	-0.00934874
GO Term	Complement and Coagulation Cascades WP558	Human Complement System WP2806	Cells and Molecules involved in local acute inflammatory response WP4493	Complement Activation WP545	Allograft Rejection WP2328
Adjusted P-Value	3.07755e-06	7.80539e-06	0.013519	0.0138149	0.0377012
P-Value	5.12925e-07	2.6018e-06	0.0067595	0.00920993	0.0377012
179th TOP pathway, peak marker NT5C3A	NT5C3A	NT5C
Fold Change in COVID v Flu	-0.211637	-0.000357149
GO Term	Pyrimidine metabolism and related diseases WP4225	Pyrimidine metabolism WP4022
Adjusted P-Value	3.5396e-06	0.0325744
P-Value	1.7698e-06	0.0325744
180th TOP pathway, peak marker IFNLR1	IFNLR1	IL10RB
Fold Change in COVID v Flu	0.142545	-0.0329687
GO Term	Type III interferon signaling WP2113	IL-10 Anti-inflammatory Signaling Pathway WP4495
Adjusted P-Value	3.5396e-06	0.0041013
P-Value	1.7698e-06	0.0041013
181th TOP pathway, peak marker CASP2	CASP2	CRADD	PIDD1
Fold Change in COVID v Flu	-0.138836	-0.0581309	0.0457747
GO Term	ATM Signaling Pathway WP2516	Apoptosis Modulation and Signaling WP1772	Apoptosis WP254	Apoptosis Modulation by HSP70 WP384	Parkinsons Disease Pathway WP2371
Adjusted P-Value	4.1034e-06	2.20111e-05	0.00232391	0.0233126	0.0342426
P-Value	5.12925e-07	5.50278e-06	0.000871466	0.0116563	0.0214016
182th TOP pathway, peak marker SUCLA2	SUCLA2	SUCLG1
Fold Change in COVID v Flu	0.0881881	0.046597
GO Term	Disorders of the Krebs cycle WP4236	TCA Cycle (aka Krebs or citric acid cycle) WP78	Amino Acid metabolism WP3925
Adjusted P-Value	5.3094e-06	1.93414e-05	0.0297457
P-Value	1.7698e-06	1.28942e-05	0.0297457
183th TOP pathway, peak marker FEN1	FEN1	RECQL	RNASEH1	EXOG	PCNA	RFC2	POLI	SPRTN	UHRF2	POLH	RFC5	MSH6	ZRANB3	UNG	RFC3	R3HDM1	RAD17
Fold Change in COVID v Flu	0.25265	0.0140515	0.0174976	0.0853037	0.172912	-0.0648785	-0.032298	-0.010723	0.0318148	0.0465337	0.0538967	0.0676043	0.0900374	0.130935	0.141406	0.048129	0.0907168
GO Term	DNA Replication WP466	Retinoblastoma Gene in Cancer WP2446	DNA IR-damage and cellular response via ATR WP4016	DNA Mismatch Repair WP531	Gastric Cancer Network 2 WP2363
Adjusted P-Value	5.31098e-06	3.77422e-05	4.04136e-05	0.000380084	0.00385711
P-Value	2.95054e-07	6.29037e-06	4.4904e-06	8.4463e-05	0.00107142
184th TOP pathway, peak marker LRP6	LRP6	FZD8	WNT1
Fold Change in COVID v Flu	0.0323927	-0.00043592	0.0100972
GO Term	Wnt Signaling in Kidney Disease WP4150	LncRNA involvement in canonical Wnt signaling and colorectal cancer WP4258	Wnt Signaling Pathway and Pluripotency WP399	Wnt Signaling WP428	ncRNAs involved in Wnt signaling in hepatocellular carcinoma WP4336
Adjusted P-Value	5.36728e-06	2.79807e-05	2.80555e-05	2.84345e-05	2.86006e-05
P-Value	2.3336e-07	3.64966e-06	6.09903e-06	7.41768e-06	2.48701e-06
185th TOP pathway, peak marker MMACHC	MMACHC	MMADHC	LMBRD1
Fold Change in COVID v Flu	0.0900923	-0.0403774	-0.0207305
GO Term	Vitamin B12 Disorders WP4271
Adjusted P-Value	5.56222e-06
P-Value	5.56222e-06
186th TOP pathway, peak marker BHLHE41	BHLHE41	NFIL3	HES2	PER2	CRY2
Fold Change in COVID v Flu	0.33952	-0.180409	-0.0946906	0.0863193	0.020289
GO Term	Circadian rhythm related genes WP3594	Melatonin metabolism and effects WP3298	Exercise-induced Circadian Regulation WP410	Development and heterogeneity of the ILC family WP3893	IL-4 Signaling Pathway WP395
Adjusted P-Value	5.7662e-06	0.000528819	0.000945736	0.0244868	0.0504324
P-Value	9.61034e-07	0.000176273	0.000472868	0.0163245	0.042027
187th TOP pathway, peak marker MAT2A	MAT2A	MAT2B
Fold Change in COVID v Flu	-0.0212109	0.0020177
GO Term	Methylation Pathways WP704	Methionine De Novo and Salvage Pathway WP3580	Trans-sulfuration and one carbon metabolism WP2525	Methionine metabolism leading to Sulphur Amino Acids and related disorders WP4292	Trans-sulfuration pathway WP2333
Adjusted P-Value	5.89933e-06	5.04393e-05	6.39094e-05	0.00502564	0.00516817
P-Value	8.42761e-07	1.44112e-05	2.73897e-05	0.00287179	0.00369155
188th TOP pathway, peak marker ELOB	ELOB	SOCS3	ASB8	ELOC	CUL2	CUL5	FEM1C	ELOA	FEM1A	WSB2	ZYG11B	CISH	ASB1	RNF7	TULP4	RNF215	LRRC41	ASB6	SPSB2	KCTD7	HOMEZ
Fold Change in COVID v Flu	-0.112137	-0.0931864	-0.0771898	0.0378432	0.0488132	0.0661291	-0.035295	-0.00596003	-0.00532515	-0.00375705	0.0138848	0.0164719	0.0190272	0.0192826	0.0408779	0.0433328	0.0599389	-0.0142314	0.00631655	0.0171301	0.0234028
GO Term	Dual hijack model of Vif in HIV infection WP3300	Type 2 papillary renal cell carcinoma WP4241	Apoptosis-related network due to altered Notch3 in ovarian cancer WP2864	IL-2 Signaling Pathway WP49	Prolactin Signaling Pathway WP2037
Adjusted P-Value	6.07709e-06	0.000263212	0.000767471	0.014978	0.0318645
P-Value	2.43084e-07	2.1057e-05	9.20965e-05	0.00239647	0.00764749
189th TOP pathway, peak marker GID8	GID8	RMND5A	WDR26	GLIPR1L2	RANBP9
Fold Change in COVID v Flu	-0.022757	0.0207716	-0.00373912	-0.00134219	0.000877415
GO Term	Ciliary landscape WP4352	Brain-Derived Neurotrophic Factor (BDNF) signaling pathway WP2380
Adjusted P-Value	6.09491e-06	0.106346
P-Value	3.04745e-06	0.106346
190th TOP pathway, peak marker ACAN	ACAN	TNN	CHST1	TNXB	CHST6	ADAMTS1	ADAMTS5	ADAMTS4	HTRA1
Fold Change in COVID v Flu	-0.0725186	-0.0469958	-0.0334442	-0.0184694	-0.00766693	-0.00272987	0.00370419	0.0400984	0.0413335
GO Term	Endochondral Ossification WP474	Metapathway biotransformation Phase I and II WP702	Focal Adhesion WP306	PI3K-Akt Signaling Pathway WP4172	VEGFA-VEGFR2 Signaling Pathway WP3888
Adjusted P-Value	6.14052e-06	0.045861	0.0829029	0.0898175	0.0918325
P-Value	6.14052e-07	0.0091722	0.0331612	0.0628723	0.0459163
191th TOP pathway, peak marker CRK	CRK	RAPGEF1	CRKL
Fold Change in COVID v Flu	-0.0614225	-0.0412293	0.00522767
GO Term	Signaling of Hepatocyte Growth Factor Receptor WP313	MET in type 1 papillary renal cell carcinoma WP4205	Interferon type I signaling pathways WP585	B Cell Receptor Signaling Pathway WP23	Focal Adhesion WP306
Adjusted P-Value	6.21324e-06	9.08002e-06	1.21617e-05	3.70884e-05	0.000201841
P-Value	3.10662e-07	1.362e-06	1.21617e-06	7.41768e-06	5.04603e-05
192th TOP pathway, peak marker CHAT	CHAT	ACHE
Fold Change in COVID v Flu	-0.0652265	0.0563559
GO Term	Acetylcholine Synthesis WP528	Biogenic Amine Synthesis WP550	Melatonin metabolism and effects WP3298	Monoamine Transport WP727	Sudden Infant Death Syndrome (SIDS) Susceptibility Pathways WP706
Adjusted P-Value	6.32071e-06	9.48106e-06	0.0138177	0.0170624	0.0470569
P-Value	1.26414e-06	3.79243e-06	0.0110542	0.0102374	0.0470569
193th TOP pathway, peak marker CHST7	CHST7	ZNF674	CHST12	UST	CHST13	SLC41A3
Fold Change in COVID v Flu	-0.229678	-0.109992	-0.0077405	0.0129516	0.134196	0.08783
GO Term	Metapathway biotransformation Phase I and II WP702
Adjusted P-Value	6.51955e-06
P-Value	6.51955e-06
194th TOP pathway, peak marker TYMP	TYMP	CDA	CES2	DCK
Fold Change in COVID v Flu	-0.177615	-0.0405862	-0.0193723	0.00553311
GO Term	Fluoropyrimidine Activity WP1601	Pyrimidine metabolism WP4022	Pyrimidine metabolism and related diseases WP4225	Phase I biotransformations, non P450 WP136	Irinotecan Pathway WP229
Adjusted P-Value	6.80182e-06	7.58661e-05	0.0103257	0.0123001	0.0129072
P-Value	7.55758e-07	1.68591e-05	0.00573651	0.00410004	0.00573651
195th TOP pathway, peak marker ISG15	ISG15	USP18	RSAD2	OAS3	HERC5	IFI6	OAS1	IFI27	UBA7	BST2	ISG20	PPM1B	IRF1	USP43	CMPK2	XAF1	SLFN12	UBE2E2	NME2
Fold Change in COVID v Flu	-0.766022	-0.73335	-0.683505	-0.628756	-0.619746	-0.426725	-0.40498	-0.328033	-0.232567	-0.208891	-0.204722	-0.0402813	-0.0274705	0.111339	-0.490961	-0.351834	-0.221844	-0.0706805	0.056388
GO Term	Type II interferon signaling (IFNG) WP619	The human immune response to tuberculosis WP4197	Non-genomic actions of 1,25 dihydroxyvitamin D3 WP4341	Pyrimidine metabolism WP4022	Nucleotide Metabolism WP404
Adjusted P-Value	6.86847e-06	0.00914186	0.0475775	0.053218	0.134764
P-Value	4.2928e-07	0.00114273	0.00892079	0.0133045	0.0421138
196th TOP pathway, peak marker EDARADD	EDARADD	EDAR
Fold Change in COVID v Flu	0.0923113	0.0550625
GO Term	EDA Signalling in Hair Follicle Development WP3930	Integrated Breast Cancer Pathway WP1984
Adjusted P-Value	7.58485e-06	0.0590423
P-Value	3.79243e-06	0.0590423
197th TOP pathway, peak marker DENND1A	DENND1A	RAB35	AOPEP	TBC1D10B	TBC1D10A	TBC1D10C	DENND1B	TBC1D13	TBC1D24	C16orf58	SYTL1
Fold Change in COVID v Flu	-0.114634	-0.058266	0.038411	-0.0549158	-0.0518696	-0.0302388	-0.0080883	0.0327606	0.0478197	0.0465401	0.0481053
GO Term	Deregulation of Rab and Rab Effector Genes in Bladder Cancer WP2291
Adjusted P-Value	7.66913e-06
P-Value	7.66913e-06
198th TOP pathway, peak marker MLPH	MLPH	RILPL2	RAB27B
Fold Change in COVID v Flu	-0.17286	-0.0838273	0.131344
GO Term	Deregulation of Rab and Rab Effector Genes in Bladder Cancer WP2291
Adjusted P-Value	7.66913e-06
P-Value	7.66913e-06
199th TOP pathway, peak marker CACNA2D1	CACNA2D1	CACNB1	CACNA1F
Fold Change in COVID v Flu	-0.141036	0.0219118	-0.00976825
GO Term	Arrhythmogenic Right Ventricular Cardiomyopathy WP2118	MAPK Signaling Pathway WP382	Alzheimers Disease WP2059	Calcium Regulation in the Cardiac Cell WP536
Adjusted P-Value	8.65203e-06	0.000151275	0.0606456	0.0662295
P-Value	2.16301e-06	7.56375e-05	0.0454842	0.0662295
200th TOP pathway, peak marker YES1	YES1	CTNND1	FYN	ZBTB33	SRC	AFAP1	PTPRA	SH2D2A
Fold Change in COVID v Flu	0.0784239	-0.0610474	-0.00871021	-0.0146703	0.0204245	-0.00691344	-0.00027922	0.0096961
GO Term	Interleukin-11 Signaling Pathway WP2332	NRF2-ARE regulation WP4357	Thymic Stromal LymphoPoietin (TSLP) Signaling Pathway WP2203	VEGFA-VEGFR2 Signaling Pathway WP3888	Wnt Signaling Pathway and Pluripotency WP399
Adjusted P-Value	8.90577e-06	8.29689e-05	0.000437535	0.00177587	0.00242716
P-Value	1.48429e-07	2.76563e-06	2.18767e-05	0.000118392	0.000202264
201th TOP pathway, peak marker LTB4R	LTB4R	P2RY6
Fold Change in COVID v Flu	-0.254753	-0.240388
GO Term	Nucleotide GPCRs WP80	GPCRs, Class A Rhodopsin-like WP455	Spinal Cord Injury WP2431
Adjusted P-Value	9.10182e-06	0.000703495	0.0386221
P-Value	3.03394e-06	0.000468997	0.0386221
202th TOP pathway, peak marker IFT46	IFT46	IFT74	TTC30A	IFT81
Fold Change in COVID v Flu	0.0869431	0.0173771	0.0493179	-0.00500089
GO Term	Ciliary landscape WP4352	Genes related to primary cilium development (based on CRISPR) WP4536	Intraflagellar transport proteins binding to dynein WP4532
Adjusted P-Value	9.14236e-06	4.96158e-05	0.000150743
P-Value	3.04745e-06	3.30772e-05	0.000150743
203th TOP pathway, peak marker HBA1	HBA1	HBB	AHSP	HBD	CYB5R4	CYB5R1	CYB5RL	CYB5R2	HP	ATAD3C
Fold Change in COVID v Flu	-0.192142	-0.101532	-0.0566129	0.0682911	-0.0877101	-0.0705263	0.0602166	0.0863691	0.0892966	0.0298027
GO Term	Oxidation by Cytochrome P450 WP43	Vitamin B12 Metabolism WP1533	Folate Metabolism WP176	Selenium Micronutrient Network WP15	Effects of Nitric Oxide WP1995
Adjusted P-Value	9.40914e-06	0.0012367	0.00155467	0.00207019	0.00716623
P-Value	1.88183e-06	0.000494681	0.0009328	0.00165615	0.00716623
204th TOP pathway, peak marker CBL	CBL	SPRY4	ZAP70	SPRY2	LAT	CD247
Fold Change in COVID v Flu	-0.137318	-0.018337	0.0565219	0.123885	-0.010878	0.0305451
GO Term	T-Cell antigen Receptor (TCR) Signaling Pathway WP69	T-Cell antigen Receptor (TCR) pathway during Staphylococcus aureus infection WP3863	Interferon type I signaling pathways WP585	Signaling Pathways in Glioblastoma WP2261	Prolactin Signaling Pathway WP2037
Adjusted P-Value	9.79882e-06	0.000162806	0.00871844	0.0118626	0.0127059
P-Value	4.26036e-07	1.4157e-05	0.00113719	0.00257883	0.00220972
205th TOP pathway, peak marker GPR20	GPR20	GPR26	GPR52	GPR27
Fold Change in COVID v Flu	-0.437949	-0.0958628	-0.0465367	0.0324327
GO Term	GPCRs, Class A Rhodopsin-like WP455
Adjusted P-Value	1.00155e-05
P-Value	1.00155e-05
206th TOP pathway, peak marker GRIN2B	GRIN2B	GRIN1	GRIN3B	LRFN2
Fold Change in COVID v Flu	-0.112207	-0.106282	0.0112668	0.0250739
GO Term	Synaptic signaling pathways associated with autism spectrum disorder WP4539	Phosphodiesterases in neuronal function WP4222	Splicing factor NOVA regulated synaptic proteins WP4148	NO/cGMP/PKG mediated Neuroprotection WP4008	Alzheimers Disease WP2059
Adjusted P-Value	1.03135e-05	0.000757726	0.000915508	0.00123804	0.00194485
P-Value	7.36681e-07	0.000216493	0.00019618	0.000176862	0.000694588
207th TOP pathway, peak marker CYP27B1	CYP27B1	CYP2R1
Fold Change in COVID v Flu	-0.0378077	-0.0105094
GO Term	Vitamin D Metabolism WP1531	Oxidation by Cytochrome P450 WP43	Metapathway biotransformation Phase I and II WP702	Nuclear Receptors in Lipid Metabolism and Toxicity WP299	Non-genomic actions of 1,25 dihydroxyvitamin D3 WP4341
Adjusted P-Value	1.06188e-05	0.000102648	0.00070556	0.0122913	0.0318094
P-Value	1.7698e-06	3.42161e-05	0.00035278	0.00819417	0.0265078
208th TOP pathway, peak marker TMEM126B	TMEM126B	TIMMDC1	ACAD9	SUGP2	OCIAD1
Fold Change in COVID v Flu	-0.0422541	0.0204035	0.0276284	0.0305004	-0.00346535
GO Term	Mitochondrial complex I assembly model OXPHOS system WP4324	mRNA Processing WP411
Adjusted P-Value	1.14188e-05	0.0980141
P-Value	5.70939e-06	0.0980141
209th TOP pathway, peak marker CREBBP	CREBBP	NCOA1	CITED2	RELA	NCOA3	CREB1	PPARD	NR1H3	ESR2	HEATR6	NR1I2
Fold Change in COVID v Flu	-0.0945003	-0.076602	-0.0389896	-0.0290267	-0.0258582	4.43088e-05	0.0312136	-0.0763817	-0.0426706	-0.00508471	0.0398431
GO Term	Androgen receptor signaling pathway WP138	Nuclear Receptors WP170	Pregnane X Receptor pathway WP2876	Nuclear Receptors in Lipid Metabolism and Toxicity WP299	Nuclear Receptors Meta-Pathway WP2882
Adjusted P-Value	1.14679e-05	1.96791e-05	0.000139208	0.000145591	0.000533548
P-Value	1.92737e-07	1.65371e-07	3.50945e-06	4.89383e-06	2.69016e-05
210th TOP pathway, peak marker HADHB	HADHB	HADHA
Fold Change in COVID v Flu	-0.0820533	-0.038899
GO Term	Valproic acid pathway WP3871	Fatty Acid Beta Oxidation WP143	Sudden Infant Death Syndrome (SIDS) Susceptibility Pathways WP706	Mitochondrial LC-Fatty Acid Beta-Oxidation WP368
Adjusted P-Value	1.21358e-05	7.83768e-05	0.000749496	0.00655803
P-Value	3.03394e-06	3.91884e-05	0.000562122	0.00655803
211th TOP pathway, peak marker NTRK2	NTRK2	SHC2	BDNF	FRS2
Fold Change in COVID v Flu	-0.0809838	-0.0391711	0.006893	0.0136531
GO Term	Brain-Derived Neurotrophic Factor (BDNF) signaling pathway WP2380	ERK Pathway in Huntington's Disease WP3853	BDNF-TrkB Signaling WP3676	Synaptic signaling pathways associated with autism spectrum disorder WP4539	Sudden Infant Death Syndrome (SIDS) Susceptibility Pathways WP706
Adjusted P-Value	1.24163e-05	0.000432548	0.00194132	0.00272099	0.0143809
P-Value	5.64378e-07	3.93225e-05	0.000264726	0.000494726	0.00326838
212th TOP pathway, peak marker CAPN5	CAPN5	CAPNS1	CAPN15	CAPN8	CAPN10
Fold Change in COVID v Flu	-0.229063	-0.0422407	0.0191997	0.0276071	0.041467
GO Term	Integrin-mediated Cell Adhesion WP185	Apoptosis Modulation and Signaling WP1772
Adjusted P-Value	1.26139e-05	0.0526311
P-Value	6.30695e-06	0.0526311
213th TOP pathway, peak marker EPHX1	EPHX1	CYP2E1	RMDN1
Fold Change in COVID v Flu	-0.129722	0.0692933	-0.0151514
GO Term	Benzene metabolism WP3891	Metapathway biotransformation Phase I and II WP702	Tamoxifen metabolism WP691	Benzo(a)pyrene metabolism WP696	Fatty Acid Omega Oxidation WP206
Adjusted P-Value	1.26414e-05	0.00264585	0.00492459	0.00512926	0.00615574
P-Value	8.42761e-07	0.00035278	0.00164153	0.0020517	0.00164153
214th TOP pathway, peak marker SSRP1	SSRP1	SUPT16H	CSNK2A1	CSNK2A2	CSNK2B
Fold Change in COVID v Flu	0.0789508	0.0316404	0.0443547	0.00577708	-0.00244541
GO Term	LncRNA involvement in canonical Wnt signaling and colorectal cancer WP4258	Wnt Signaling WP428	ncRNAs involved in Wnt signaling in hepatocellular carcinoma WP4336	Breast cancer pathway WP4262	Allograft Rejection WP2328
Adjusted P-Value	1.27738e-05	1.73079e-05	1.74091e-05	2.68232e-05	0.0527817
P-Value	3.64966e-06	7.41768e-06	2.48701e-06	1.53275e-05	0.0377012
215th TOP pathway, peak marker PPP1CC	PPP1CC	PPP1CB	SHOC2	PPP1CA	PPP1R15B	PPP1R7	PPP1R8	PPP1R12C	SLC35F5	PPP1R2
Fold Change in COVID v Flu	0.0517843	-0.0373149	-0.00945668	-0.000559951	0.00711362	0.00806387	0.0248819	-0.037173	-0.00251833	0.00305918
GO Term	Common Pathways Underlying Drug Addiction WP2636	Focal Adhesion WP306	Hippo-Merlin Signaling Dysregulation WP4541	Circadian rhythm related genes WP3594	Nicotine Activity on Dopaminergic Neurons WP1602
Adjusted P-Value	1.35014e-05	3.58212e-05	0.000266056	0.000591296	0.0228661
P-Value	1.68768e-06	8.95529e-06	9.97709e-05	0.000295648	0.0142913
216th TOP pathway, peak marker STAT2	STAT2	IRF9
Fold Change in COVID v Flu	-0.284755	-0.213454
GO Term	Type III interferon signaling WP2113	The human immune response to tuberculosis WP4197	Type II interferon signaling (IFNG) WP619	Interferon type I signaling pathways WP585	IL-10 Anti-inflammatory Signaling Pathway WP4495
Adjusted P-Value	1.41584e-05	8.52874e-05	0.000104502	0.000232265	0.00656208
P-Value	1.7698e-06	2.13219e-05	3.91884e-05	0.000116133	0.0041013
217th TOP pathway, peak marker PGS1	PGS1	PTPMT1
Fold Change in COVID v Flu	-0.220211	0.0823027
GO Term	Glycerophospholipid Biosynthetic Pathway WP2533
Adjusted P-Value	1.44112e-05
P-Value	1.44112e-05
218th TOP pathway, peak marker LIPE	LIPE	LIPG	ACSF2	PNPLA4	PLIN1	PNPLA2
Fold Change in COVID v Flu	0.111801	-0.039004	-0.0389726	-0.0204576	-0.0141628	-0.00809289
GO Term	Lipid Metabolism Pathway WP3965	Thermogenesis WP4321	Triacylglyceride Synthesis WP325	Fatty Acid Beta Oxidation WP143	Adipogenesis WP236
Adjusted P-Value	1.47428e-05	0.000396372	0.000524731	0.0010649	0.00970173
P-Value	1.34026e-06	7.20677e-05	0.000143109	0.000387237	0.00440988
219th TOP pathway, peak marker CABIN1	CABIN1	MEF2D	MEF2B
Fold Change in COVID v Flu	-0.0475849	-0.0232776	-0.014023
GO Term	SRF and miRs in Smooth Muscle Differentiation and Proliferation WP1991	Cell Differentiation - Index WP2029	Cell Differentiation - Index expanded WP2023	miRs in Muscle Cell Differentiation WP2012	Energy Metabolism WP1541
Adjusted P-Value	1.51697e-05	1.7698e-05	1.85407e-05	5.81505e-05	0.00015945
P-Value	3.03394e-06	1.7698e-06	5.56222e-06	2.32602e-05	7.97252e-05
220th TOP pathway, peak marker GABBR2	GABBR2	GABBR1
Fold Change in COVID v Flu	-0.0885895	0.0197132
GO Term	GPCRs, Class C Metabotropic glutamate, pheromone WP501	GABA receptor Signaling WP4159	Rett syndrome causing genes WP4312	Splicing factor NOVA regulated synaptic proteins WP4148
Adjusted P-Value	1.51697e-05	2.29231e-05	0.0175758	0.0218062
P-Value	3.79243e-06	1.14616e-05	0.0175758	0.0163546
221th TOP pathway, peak marker HMGCS1	HMGCS1	HMGCR
Fold Change in COVID v Flu	0.0713514	-0.00419542
GO Term	Mevalonate pathway WP3963	SREBF and miR33 in cholesterol and lipid homeostasis WP2011	Cholesterol Biosynthesis Pathway WP197	Sterol Regulatory Element-Binding Proteins (SREBP) signalling WP1982	Statin Pathway WP430
Adjusted P-Value	1.59282e-05	3.03394e-05	3.45111e-05	0.00037033	0.0125409
P-Value	1.7698e-06	1.01131e-05	7.66913e-06	0.000164591	0.00696719
222th TOP pathway, peak marker GAPDH	GAPDH	ALDOA	TPI1	TPPP	ZNF224
Fold Change in COVID v Flu	0.104732	-0.021641	0.00920143	0.0735378	-0.00123192
GO Term	Glycolysis and Gluconeogenesis WP534	Pathways in clear cell renal cell carcinoma WP4018	HIF1A and PPARG regulation of glycolysis WP2456	Cori Cycle WP1946	Sudden Infant Death Syndrome (SIDS) Susceptibility Pathways WP706
Adjusted P-Value	1.60508e-05	5.61971e-05	7.06757e-05	9.83063e-05	0.000103436
P-Value	1.60508e-06	1.68591e-05	1.41351e-05	3.93225e-05	5.17178e-05
223th TOP pathway, peak marker ATP5F1A	ATP5F1A	ATP5F1B	ATP5F1C
Fold Change in COVID v Flu	0.0890729	-0.0148879	0.0164389
GO Term	Electron Transport Chain (OXPHOS system in mitochondria) WP111	Oxidative phosphorylation WP623
Adjusted P-Value	1.62858e-05	0.000443953
P-Value	8.14289e-06	0.000443953
224th TOP pathway, peak marker TCN2	TCN2	CD320
Fold Change in COVID v Flu	-0.632882	0.197434
GO Term	Vitamin B12 Disorders WP4271	Vitamin B12 Metabolism WP1533	One Carbon Metabolism WP241
Adjusted P-Value	1.66867e-05	0.0143177	0.0153562
P-Value	5.56222e-06	0.0143177	0.0102374
225th TOP pathway, peak marker MMAA	MMAA	MMUT
Fold Change in COVID v Flu	0.0490715	-0.0400468
GO Term	Vitamin B12 Disorders WP4271	Vitamin B12 Metabolism WP1533	Amino Acid metabolism WP3925
Adjusted P-Value	1.66867e-05	0.0214765	0.0297457
P-Value	5.56222e-06	0.0143177	0.0297457
226th TOP pathway, peak marker IFT52	IFT52	TTC30B	IFT57
Fold Change in COVID v Flu	-0.0580801	-0.0110603	0.0290274
GO Term	Genes related to primary cilium development (based on CRISPR) WP4536	Ciliary landscape WP4352
Adjusted P-Value	1.67895e-05	7.34557e-05
P-Value	8.39473e-06	7.34557e-05
227th TOP pathway, peak marker TRAF3	TRAF3	MAP3K1	OTUD5	RNF216	IKBKE	TRAF5	MAP4K2	MAP2K7	OTUD4	ANKIB1
Fold Change in COVID v Flu	-0.117313	-0.0973951	-0.0423409	-0.0347624	0.0201858	0.0724698	-0.0591684	0.00258181	0.0153359	0.0345521
GO Term	Regulation of toll-like receptor signaling pathway WP1449	RIG-I-like Receptor Signaling WP3865	Angiopoietin Like Protein 8 Regulatory Pathway WP3915	RANKL/RANK (Receptor activator of NFKB (ligand)) Signaling Pathway WP2018	Cardiac Hypertrophic Response WP2795
Adjusted P-Value	1.74585e-05	1.98907e-05	0.000290164	0.000430447	0.000516537
P-Value	3.71458e-07	8.46411e-07	1.85211e-05	5.49507e-05	5.49507e-05
228th TOP pathway, peak marker ATP2A2	ATP2A2	ATP2A1	ATP2A3
Fold Change in COVID v Flu	0.0571716	-0.013414	0.0526619
GO Term	Alzheimers Disease WP2059	Myometrial Relaxation and Contraction Pathways WP289	Calcium Regulation in the Cardiac Cell WP536	Endothelin Pathways WP2197	Arrhythmogenic Right Ventricular Cardiomyopathy WP2118
Adjusted P-Value	1.7528e-05	0.00305912	0.00373324	0.0183858	0.0389013
P-Value	3.50559e-06	0.00183547	0.0014933	0.0147086	0.0389013
229th TOP pathway, peak marker TEK	TEK	ANGPT1	TIE1
Fold Change in COVID v Flu	0.173404	0.143664	-0.0176612
GO Term	RAC1/PAK1/p38/MMP2 Pathway WP3303	Angiogenesis WP1539	PI3K-Akt Signaling Pathway WP4172	Focal Adhesion-PI3K-Akt-mTOR-signaling pathway WP3932	Photodynamic therapy-induced HIF-1 survival signaling WP3614
Adjusted P-Value	1.7671e-05	0.000313067	0.0180601	0.021566	0.03743
P-Value	1.96344e-06	6.95705e-05	0.00802671	0.00718866	0.0207944
230th TOP pathway, peak marker NOS3	NOS3	NOSIP	ACE	LYPLA1
Fold Change in COVID v Flu	0.1051	-0.0513829	-0.0105074	-0.00788251
GO Term	ACE Inhibitor Pathway WP554	Effects of Nitric Oxide WP1995	PI3K-AKT-mTOR signaling pathway and therapeutic opportunities WP3844	Endothelin Pathways WP2197	NO/cGMP/PKG mediated Neuroprotection WP4008
Adjusted P-Value	1.7698e-05	0.0201026	0.0332375	0.0344013	0.0362602
P-Value	1.26414e-06	0.00287179	0.0118705	0.00982896	0.0155401
231th TOP pathway, peak marker VAV1	VAV1	SYK	TEC	VAV3	BLNK
Fold Change in COVID v Flu	-0.145509	-0.124369	0.0461215	-0.114751	0.0510697
GO Term	B Cell Receptor Signaling Pathway WP23	Microglia Pathogen Phagocytosis Pathway WP3937	IL-3 Signaling Pathway WP286	Kit receptor signaling pathway WP304	Prolactin Signaling Pathway WP2037
Adjusted P-Value	1.81401e-05	5.1892e-05	0.00742387	0.00825048	0.0114906
P-Value	6.97694e-07	3.9917e-06	0.000856601	0.0012693	0.00220972
232th TOP pathway, peak marker KITLG	KITLG	KIT	CLEC11A	MATK	STAP1	GRAP
Fold Change in COVID v Flu	0.138369	-0.0886761	0.0201621	0.111654	-0.0829564	0.027769
GO Term	Kit receptor signaling pathway WP304	Differentiation Pathway WP2848	PI3K-Akt Signaling Pathway WP4172	Neovascularisation processes WP4331	Imatinib and Chronic Myeloid Leukemia WP3640
Adjusted P-Value	1.87083e-05	0.000712132	0.0260868	0.0265791	0.0303064
P-Value	1.4391e-06	0.000109559	0.00802671	0.0122673	0.0116563
233th TOP pathway, peak marker CYCS	CYCS	SUOX	COX5B	COX14	MT-CO1	COX18	TACO1	COX20	SCO1	COX16	COX11	PAPSS1	APOBEC3D	COX6A1	AOX1	COX8A	ETHE1	TST	MPST	NEK10	CCDC116
Fold Change in COVID v Flu	0.116805	-0.0951722	-0.0311575	-0.00392557	0.0151218	0.0254637	0.0323813	0.0327597	0.0328763	0.0489967	0.105246	-0.0739388	0.00407967	0.0106162	0.0256113	0.0259866	0.0582666	0.0758738	0.076014	0.0811052	-0.00121635
GO Term	Cysteine and methionine catabolism WP4504	Electron Transport Chain (OXPHOS system in mitochondria) WP111	Molybdenum cofactor (Moco) biosynthesis WP4507	Nonalcoholic fatty liver disease WP4396	Nicotine Metabolism WP1600
Adjusted P-Value	1.88935e-05	3.54601e-05	0.000622672	0.00120958	0.0121921
P-Value	1.39952e-06	1.31334e-06	6.91858e-05	0.000179197	0.0022578
234th TOP pathway, peak marker SDC2	SDC2	GLCE	HS3ST1	HS6ST1	GPC4	EXT1	HS2ST1	NDST2
Fold Change in COVID v Flu	0.107796	-0.0442139	-0.00990321	0.0578608	0.0916962	-0.0757921	0.0291363	0.0357007
GO Term	Metapathway biotransformation Phase I and II WP702	miRNA targets in ECM and membrane receptors WP2911	Mesodermal Commitment Pathway WP2857	Endoderm Differentiation WP2853	Wnt Signaling WP428
Adjusted P-Value	1.99634e-05	0.0674949	0.154067	0.192584	0.216859
P-Value	3.99268e-06	0.026998	0.154067	0.154067	0.130115
235th TOP pathway, peak marker STAT3	STAT3	PTPRT	IL6R	JAK1	SIGIRR	RORC	IL21R	TRIM24	BATF	PTPN2
Fold Change in COVID v Flu	-0.168862	-0.128523	-0.0993547	-0.0383385	-0.0209887	0.00545033	0.0471112	0.0477335	0.147044	-0.000229555
GO Term	ncRNAs involved in STAT3 signaling in hepatocellular carcinoma WP4337	TCA Cycle Nutrient Utilization and Invasiveness of Ovarian Cancer WP2868	Hepatitis C and Hepatocellular Carcinoma WP3646	IL-6 signaling pathway WP364	IL-10 Anti-inflammatory Signaling Pathway WP4495
Adjusted P-Value	2.08836e-05	0.000412106	0.00047004	0.000525027	0.00110888
P-Value	2.98337e-07	1.76617e-05	2.68594e-05	1.50008e-05	7.92058e-05
236th TOP pathway, peak marker MAP2K6	MAP2K6	MAP3K7	MAPK12	PPM1L	TAB1
Fold Change in COVID v Flu	-0.331955	0.0346001	0.0604527	-0.0293553	0.00598531
GO Term	Toll-like Receptor Signaling Pathway WP75	Signal transduction through IL1R WP4496	Regulation of toll-like receptor signaling pathway WP1449	IL-1 signaling pathway WP195	RANKL/RANK (Receptor activator of NFKB (ligand)) Signaling Pathway WP2018
Adjusted P-Value	2.08863e-05	3.38729e-05	4.04679e-05	0.000101707	0.000108309
P-Value	3.86783e-07	1.88183e-06	1.49881e-06	1.13008e-05	1.00287e-05
237th TOP pathway, peak marker GLB1	GLB1	FUCA2	GALNS	CTSA	NEU1
Fold Change in COVID v Flu	-0.0636755	-0.0475063	-0.0179303	0.0484838	-0.0292482
GO Term	Degradation pathway of sphingolipids, including diseases WP4153	Ciliary landscape WP4352	Ectoderm Differentiation WP2858
Adjusted P-Value	2.12201e-05	0.0077096	0.0697554
P-Value	7.07338e-06	0.00513973	0.0697554
238th TOP pathway, peak marker SKI	SKI	SMAD4	SKIL
Fold Change in COVID v Flu	0.0195169	0.0161776	0.0147931
GO Term	TGF-beta Receptor Signaling WP560	TGF-beta Signaling Pathway WP366	Transcription co-factors SKI and SKIL protein partners WP4533	Ectoderm Differentiation WP2858	Vitamin D in inflammatory diseases WP4482
Adjusted P-Value	2.12781e-05	0.00022813	0.000347382	0.0112053	0.0316097
P-Value	7.88077e-07	1.68985e-05	3.8598e-05	0.00166005	0.012878
239th TOP pathway, peak marker IL12RB2	IL12RB2	IL12RB1
Fold Change in COVID v Flu	0.0846048	-0.00497434
GO Term	Selective expression of chemokine receptors during T-cell polarization WP4494
Adjusted P-Value	2.13219e-05
P-Value	2.13219e-05
240th TOP pathway, peak marker MX1	MX1	OASL	IFITM1
Fold Change in COVID v Flu	-0.607584	-0.338053	-0.276651
GO Term	The human immune response to tuberculosis WP4197
Adjusted P-Value	2.13219e-05
P-Value	2.13219e-05
241th TOP pathway, peak marker STK11	STK11	STRADA	STK11IP	CAB39	CAB39L	NUAK1	BRSK1	C5orf24
Fold Change in COVID v Flu	0.0685292	-0.0661938	-0.0331362	-0.0257457	-0.00848943	0.0415138	0.0141625	0.0586156
GO Term	AMP-activated Protein Kinase (AMPK) Signaling WP1403	Focal Adhesion-PI3K-Akt-mTOR-signaling pathway WP3932	mir-124 predicted interactions with cell cycle and differentiation WP3595	Endochondral Ossification WP474	ATM Signaling Network in Development and Disease WP3878
Adjusted P-Value	2.22367e-05	4.23111e-05	0.00956675	0.0554947	0.0637843
P-Value	6.35333e-06	6.04444e-06	0.00410004	0.039639	0.0364482
242th TOP pathway, peak marker ALDH18A1	ALDH18A1	NOXRED1	CCNI	ZFYVE27	ALDH4A1	OAT	CCNI2	THNSL1	TMED8	ZFHX2
Fold Change in COVID v Flu	0.194822	-0.129943	-0.0641412	-0.0453262	-0.00199225	0.0148932	0.0968167	0.166036	-0.129326	0.020546
GO Term	Urea cycle and metabolism of amino groups WP497	Amino Acid metabolism WP3925
Adjusted P-Value	2.29231e-05	0.000221478
P-Value	1.14616e-05	0.000221478
243th TOP pathway, peak marker FAAH	FAAH	NAPEPLD
Fold Change in COVID v Flu	-0.10883	0.0366911
GO Term	Cannabinoid receptor signaling WP3869
Adjusted P-Value	2.32602e-05
P-Value	2.32602e-05
244th TOP pathway, peak marker SLC30A5	SLC30A5	SLC30A9	KCTD9
Fold Change in COVID v Flu	0.0641026	0.0524092	0.0456735
GO Term	Zinc homeostasis WP3529
Adjusted P-Value	2.32602e-05
P-Value	2.32602e-05
245th TOP pathway, peak marker TH	TH	DDC
Fold Change in COVID v Flu	-0.0950944	-0.0523843
GO Term	Dopamine metabolism WP2436	Nicotine Activity on Dopaminergic Neurons WP1602	Dopaminergic Neurogenesis WP2855	Biogenic Amine Synthesis WP550	Parkinsons Disease Pathway WP2371
Adjusted P-Value	2.54935e-05	2.81201e-05	3.15193e-05	4.17167e-05	0.000110317
P-Value	4.63519e-06	7.66913e-06	1.14616e-05	3.79243e-06	5.01443e-05
246th TOP pathway, peak marker NMNAT3	NMNAT3	NADSYN1
Fold Change in COVID v Flu	-0.0388658	-0.00563207
GO Term	Tryptophan catabolism leading to NAD+ production WP4210	NAD Biosynthesis II (from tryptophan) WP2485	NAD+ metabolism WP3644	NAD+ biosynthetic pathways WP3645
Adjusted P-Value	2.62942e-05	0.00574359	0.00765261	0.00778526
P-Value	6.57354e-06	0.00287179	0.00573946	0.00778526
247th TOP pathway, peak marker H6PD	H6PD	PGD	PGLS	IDNK
Fold Change in COVID v Flu	0.0666775	-0.0509841	-0.038144	0.0314021
GO Term	Pentose Phosphate Metabolism WP134	Classical pathway of steroidogenesis, including diseases WP4523	Metabolic reprogramming in colon cancer WP4290	NRF2 pathway WP2884	Nuclear Receptors Meta-Pathway WP2882
Adjusted P-Value	2.65288e-05	0.00922697	0.0417326	0.0820512	0.137864
P-Value	5.30576e-06	0.00369079	0.0250395	0.065641	0.137864
248th TOP pathway, peak marker SLC51A	SLC51A	ZDHHC19	ABCC3
Fold Change in COVID v Flu	-0.110876	0.0121253	0.089179
GO Term	Drug Induction of Bile Acid Pathway WP2289	Codeine and Morphine Metabolism WP1604	Photodynamic therapy-induced NFE2L2 (NRF2) survival signaling WP3612	Nuclear Receptors in Lipid Metabolism and Toxicity WP299	Fluoropyrimidine Activity WP1601
Adjusted P-Value	2.73055e-05	0.00923266	0.0135176	0.0147495	0.0152621
P-Value	3.03394e-06	0.0020517	0.00901173	0.00819417	0.0118705
249th TOP pathway, peak marker TAF8	TAF8	TAF1	TAF11	TAF7	TAF10	TBP	TAF2	TAF13	CUEDC2
Fold Change in COVID v Flu	-0.173005	-0.0476571	-0.0204369	-0.00344019	0.0128609	0.0290395	0.044785	0.107468	0.0123801
GO Term	Eukaryotic Transcription Initiation WP405	Prion disease pathway WP3995	Ovarian Infertility Genes WP34	MECP2 and Associated Rett Syndrome WP3584	Regulation of toll-like receptor signaling pathway WP1449
Adjusted P-Value	2.7348e-05	0.0540421	0.0559603	0.0653251	0.113556
P-Value	5.4696e-06	0.0324253	0.0223841	0.0522601	0.113556
250th TOP pathway, peak marker KDSR	KDSR	DEGS1	CERS5	RDH13
Fold Change in COVID v Flu	0.115603	-0.0931114	-0.0148136	0.0914043
GO Term	Sphingolipid pathway WP1422
Adjusted P-Value	2.73897e-05
P-Value	2.73897e-05
251th TOP pathway, peak marker UGCG	UGCG	CERS6	CERS2
Fold Change in COVID v Flu	-0.0809386	-0.0459528	0.0510225
GO Term	Sphingolipid pathway WP1422
Adjusted P-Value	2.73897e-05
P-Value	2.73897e-05
252th TOP pathway, peak marker B4GALT6	B4GALT6	GBA
Fold Change in COVID v Flu	0.136848	-0.10344
GO Term	Sphingolipid pathway WP1422
Adjusted P-Value	2.73897e-05
P-Value	2.73897e-05
253th TOP pathway, peak marker GRAP2	GRAP2	LCP2	TXK	ITK	UBASH3A
Fold Change in COVID v Flu	0.0934102	-0.0611008	0.00454603	0.0189705	0.0559747
GO Term	T-Cell antigen Receptor (TCR) pathway during Staphylococcus aureus infection WP3863	T-Cell antigen Receptor (TCR) Signaling Pathway WP69	T-Cell Receptor and Co-stimulatory Signaling WP2583	Chemokine signaling pathway WP3929	Focal Adhesion WP306
Adjusted P-Value	2.8547e-05	5.06292e-05	0.036651	0.131989	0.140567
P-Value	5.70939e-06	2.02517e-05	0.0219906	0.105591	0.140567
254th TOP pathway, peak marker TFB2M	TFB2M	POLRMT	TEFM
Fold Change in COVID v Flu	0.07983	0.0436159	0.015774
GO Term	Mitochondrial Gene Expression WP391	Energy Metabolism WP1541
Adjusted P-Value	2.88224e-05	0.0179827
P-Value	1.44112e-05	0.0179827
255th TOP pathway, peak marker CD209	CD209	BTN2A1	ICAM3	ICAM2
Fold Change in COVID v Flu	-0.401495	-0.154805	-0.0670385	0.0359216
GO Term	Ebola Virus Pathway on Host WP4217	Human Complement System WP2806
Adjusted P-Value	2.91599e-05	0.0412986
P-Value	1.45799e-05	0.0412986
256th TOP pathway, peak marker DICER1	DICER1	AGO4	AGO2	AGO1	STAU2	AGO3	TARBP2	PRKRA	TNRC6C	ZMAT4	TNRC6A	TCOF1
Fold Change in COVID v Flu	-0.132201	-0.121363	-0.0762674	-0.00155516	0.0220503	0.0517405	0.0700391	0.107312	-0.022952	-0.00495002	0.00767348	0.035769
GO Term	miRNA Biogenesis WP2338	exRNA mechanism of action and biogenesis WP2805	mRNA Processing WP411	Ebola Virus Pathway on Host WP4217	Endoderm Differentiation WP2853
Adjusted P-Value	3.15517e-05	6.31033e-05	0.12099	0.146599	0.187706
P-Value	1.26207e-05	1.26207e-05	0.12099	0.117279	0.112624
257th TOP pathway, peak marker TNNI2	TNNI2	TNNT3
Fold Change in COVID v Flu	-0.225138	0.0639655
GO Term	Striated Muscle Contraction Pathway WP383
Adjusted P-Value	3.18564e-05
P-Value	3.18564e-05
258th TOP pathway, peak marker IFNGR1	IFNGR1	IFNGR2
Fold Change in COVID v Flu	-0.220632	-0.0164756
GO Term	The human immune response to tuberculosis WP4197	Type II interferon signaling (IFNG) WP619	Selective expression of chemokine receptors during T-cell polarization WP4494
Adjusted P-Value	3.19828e-05	3.91884e-05	6.39656e-05
P-Value	2.13219e-05	3.91884e-05	2.13219e-05
259th TOP pathway, peak marker SF3A1	SF3A1	PPIL4	SF3A3	SFSWAP
Fold Change in COVID v Flu	-0.0958259	-0.018184	0.0461694	-0.017064
GO Term	mRNA Processing WP411	Exercise-induced Circadian Regulation WP410
Adjusted P-Value	3.22005e-05	0.0268551
P-Value	1.61002e-05	0.0268551
260th TOP pathway, peak marker FKBP1B	FKBP1B	RYR3	RYR2
Fold Change in COVID v Flu	-0.0302971	-0.0206337	-0.00542086
GO Term	Cell-type Dependent Selectivity of CCK2R Signaling WP3679	Myometrial Relaxation and Contraction Pathways WP289	Calcium Regulation in the Cardiac Cell WP536	MFAP5-mediated ovarian cancer cell motility and invasiveness WP3301	Alzheimers Disease WP2059
Adjusted P-Value	3.24463e-05	0.00145143	0.00176832	0.00789419	0.0356467
P-Value	4.63519e-06	0.000622042	0.000505235	0.00451096	0.0305543
261th TOP pathway, peak marker MGST1	MGST1	MGST2	MGST3
Fold Change in COVID v Flu	0.0968121	-0.0894849	0.0439808
GO Term	Metapathway biotransformation Phase I and II WP702	Nuclear Receptors Meta-Pathway WP2882	NRF2 pathway WP2884	Aryl Hydrocarbon Receptor Pathway WP2873	Oxidative Stress WP408
Adjusted P-Value	3.25977e-05	0.000277157	0.00244392	0.0189713	0.0199098
P-Value	6.51955e-06	0.000110863	0.00146635	0.0189713	0.0159278
262th TOP pathway, peak marker SLC2A5	SLC2A5	SLC5A1	MFSD4B	SLC2A11	MFSD14A
Fold Change in COVID v Flu	0.329401	-0.240927	0.0497299	0.120872	-0.0136691
GO Term	NRF2 pathway WP2884	Nuclear Receptors Meta-Pathway WP2882	Glycolysis and Gluconeogenesis WP534
Adjusted P-Value	3.26965e-05	0.000166294	0.0226153
P-Value	1.08988e-05	0.000110863	0.0226153
263th TOP pathway, peak marker CLSPN	CLSPN	RPA2	RPA3	RPA4	RFWD3
Fold Change in COVID v Flu	0.214614	0.00096689	0.0619177	-0.0179729	0.0407609
GO Term	DNA Replication WP466	DNA IR-damage and cellular response via ATR WP4016	G1 to S cell cycle control WP45	Retinoblastoma Gene in Cancer WP2446	miRNA Regulation of DNA Damage Response WP1530
Adjusted P-Value	3.28176e-05	0.000124945	0.0031095	0.0045662	0.0688627
P-Value	5.4696e-06	4.16483e-05	0.00155475	0.00304413	0.0688627
264th TOP pathway, peak marker KIFAP3	KIFAP3	KIF12	KIF17	KIF3C	KIF9	KIF3B	KIF1C	KIF3A
Fold Change in COVID v Flu	0.146424	-0.0959494	-0.0597393	-0.0370054	0.0514848	0.0754657	0.0870744	0.120067
GO Term	Genes related to primary cilium development (based on CRISPR) WP4536	Endochondral Ossification WP474	Hedgehog Signaling Pathway WP4249	Insulin Signaling WP481
Adjusted P-Value	3.35789e-05	0.0398347	0.0464434	0.0884102
P-Value	8.39473e-06	0.029876	0.0232217	0.0884102
265th TOP pathway, peak marker IL10	IL10	IL10RA	CD276
Fold Change in COVID v Flu	-0.215045	-0.110166	0.00166567
GO Term	IL-10 Anti-inflammatory Signaling Pathway WP4495	Cytokines and Inflammatory Response WP530	PI3K/AKT/mTOR - VitD3 Signalling WP4141	miRNAs involvement in the immune response in sepsis WP4329	Allograft Rejection WP2328
Adjusted P-Value	3.41318e-05	0.0239852	0.0245825	0.0312976	0.0325185
P-Value	3.79243e-06	0.00533004	0.00819417	0.01391	0.0252922
266th TOP pathway, peak marker GABRB3	GABRB3	GABRG3
Fold Change in COVID v Flu	-0.0889565	-0.0714501
GO Term	GABA receptor Signaling WP4159	Prader-Willi and Angelman Syndrome WP3998	Brain-Derived Neurotrophic Factor (BDNF) signaling pathway WP2380
Adjusted P-Value	3.43847e-05	9.36729e-05	0.0546564
P-Value	1.14616e-05	6.24486e-05	0.0546564
267th TOP pathway, peak marker C1S	C1S	C1R
Fold Change in COVID v Flu	0.0708464	-0.0143874
GO Term	Complement Activation WP545	Oxidative Damage WP3941	Complement and Coagulation Cascades WP558	Human Complement System WP2806
Adjusted P-Value	3.5396e-05	8.76472e-05	0.000131471	0.000191981
P-Value	8.84899e-06	6.57354e-05	6.57354e-05	0.000191981
268th TOP pathway, peak marker NELFCD	NELFCD	NELFA
Fold Change in COVID v Flu	0.0687246	0.0347401
GO Term	Initiation of transcription and translation elongation at the HIV-1 LTR WP3414
Adjusted P-Value	3.66601e-05
P-Value	3.66601e-05
269th TOP pathway, peak marker NELFB	NELFB	NELFE
Fold Change in COVID v Flu	0.0322912	-0.00045186
GO Term	Initiation of transcription and translation elongation at the HIV-1 LTR WP3414
Adjusted P-Value	3.66601e-05
P-Value	3.66601e-05
270th TOP pathway, peak marker VWF	VWF	ADAMTS13	F8	ATAT1
Fold Change in COVID v Flu	0.183422	-0.00362842	0.016591	0.0443016
GO Term	Blood Clotting Cascade WP272	Complement and Coagulation Cascades WP558	PI3K-Akt Signaling Pathway WP4172	Focal Adhesion WP306	Focal Adhesion-PI3K-Akt-mTOR-signaling pathway WP3932
Adjusted P-Value	3.83456e-05	0.000164338	0.102728	0.121549	0.121595
P-Value	7.66913e-06	6.57354e-05	0.102728	0.0729293	0.0972757
271th TOP pathway, peak marker SMC1B	SMC1B	RAD21	STAG1
Fold Change in COVID v Flu	-0.0693252	-0.0102878	0.0322928
GO Term	Regulation of sister chromatid separation at the metaphase-anaphase transition WP4240	Cell Cycle WP179	Prion disease pathway WP3995
Adjusted P-Value	3.97496e-05	4.15712e-05	0.0195793
P-Value	2.64997e-05	1.38571e-05	0.0195793
272th TOP pathway, peak marker GABPB1	GABPB1	STMN3	GABPA	GABPB2
Fold Change in COVID v Flu	0.072765	0.047295	0.0688876	0.0327926
GO Term	Hematopoietic Stem Cell Gene Regulation by GABP alpha/beta Complex WP3657	Mitochondrial Gene Expression WP391	Myometrial Relaxation and Contraction Pathways WP289	Energy Metabolism WP1541	Allograft Rejection WP2328
Adjusted P-Value	4.00312e-05	7.20561e-05	0.00103674	0.0224783	0.0252922
P-Value	1.60125e-05	1.44112e-05	0.000622042	0.0179827	0.0252922
273th TOP pathway, peak marker RIMS1	RIMS1	FAT2	RAB3A	TSPOAP1	UNC13B	CADPS	RAB34	DMAC2	RASL10B
Fold Change in COVID v Flu	-0.152744	-0.126207	0.00361075	0.0773244	0.106532	-0.102363	-0.0641923	0.0435753	-0.0167389
GO Term	Synaptic Vesicle Pathway WP2267	Vitamin A and Carotenoid Metabolism WP716	Monoamine Transport WP727	Mitochondrial complex I assembly model OXPHOS system WP4324	Retinoblastoma Gene in Cancer WP2446
Adjusted P-Value	4.07348e-05	0.0508104	0.0762155	0.0842816	0.103425
P-Value	6.78913e-06	0.0254052	0.0254052	0.0561877	0.0861875
274th TOP pathway, peak marker ITGA2B	ITGA2B	ITGB3	ITGAV	FERMT3
Fold Change in COVID v Flu	0.279566	0.195434	0.00816131	0.0236661
GO Term	Arrhythmogenic Right Ventricular Cardiomyopathy WP2118	Osteoblast Signaling WP322	Hippo-Merlin Signaling Dysregulation WP4541	MFAP5-mediated ovarian cancer cell motility and invasiveness WP3301	Integrin-mediated Cell Adhesion WP185
Adjusted P-Value	4.10971e-05	4.47981e-05	4.89461e-05	5.2776e-05	5.9916e-05
P-Value	2.16301e-06	7.07338e-06	1.03044e-05	1.38884e-05	6.30695e-06
275th TOP pathway, peak marker HCN4	HCN4	IRX4	HCN2
Fold Change in COVID v Flu	-0.0696077	-0.0457196	0.00316299
GO Term	Genes targeted by miRNAs in adipocytes WP1992	Heart Development WP1591	Cardiac Progenitor Differentiation WP2406
Adjusted P-Value	4.16653e-05	0.0183631	0.025719
P-Value	1.38884e-05	0.0183631	0.017146
276th TOP pathway, peak marker SCLT1	SCLT1	FBF1	CEP89	CEP83
Fold Change in COVID v Flu	-0.230922	0.0421045	0.0651552	0.100838
GO Term	Genes related to primary cilium development (based on CRISPR) WP4536	Human Complement System WP2806	Selenium Micronutrient Network WP15	Folate Metabolism WP176	Vitamin B12 Metabolism WP1533
Adjusted P-Value	4.19737e-05	0.0412986	0.0486267	0.0487873	0.0535041
P-Value	8.39473e-06	0.0412986	0.0389013	0.0292724	0.0214016
277th TOP pathway, peak marker C1GALT1	C1GALT1	GALNT6	GALNT3	GALNT16	ST6GALNAC1	GALNT1	GALNT11	GCNT4	GALNT7	GALNT18	FAM81A
Fold Change in COVID v Flu	-0.147585	-0.100443	-0.0858454	-0.0355738	-0.0321335	-0.0276178	-0.00135113	0.0165022	0.0185094	0.0676567	0.00101912
GO Term	Metabolism of Spingolipids in ER and Golgi apparatus WP4142	Globo Sphingolipid Metabolism WP1424	Ectoderm Differentiation WP2858
Adjusted P-Value	4.24054e-05	0.0232696	0.0919177
P-Value	1.41351e-05	0.0155131	0.0919177
278th TOP pathway, peak marker PXN	PXN	NEDD9	PTK2B	BCAR1	PARVA	VCL	NUDCD2	PTK2	PITPNM1	LPXN
Fold Change in COVID v Flu	-0.186408	-0.185103	-0.139893	-0.0316278	-0.0282062	0.0215501	0.0805921	0.135747	-0.019163	0.0275619
GO Term	Integrin-mediated Cell Adhesion WP185	Focal Adhesion WP306	VEGFA-VEGFR2 Signaling Pathway WP3888	Signaling of Hepatocyte Growth Factor Receptor WP313	Regulation of Actin Cytoskeleton WP51
Adjusted P-Value	4.33046e-05	4.50488e-05	5.43374e-05	7.25358e-05	8.30081e-05
P-Value	3.82099e-06	1.32496e-06	3.19632e-06	1.0667e-05	9.76566e-06
279th TOP pathway, peak marker OGDH	OGDH	SLC25A11	DLST
Fold Change in COVID v Flu	-0.0607743	0.0105288	0.0179598
GO Term	TCA Cycle (aka Krebs or citric acid cycle) WP78	TCA Cycle and Deficiency of Pyruvate Dehydrogenase complex (PDHc) WP2453	Amino Acid metabolism WP3925	Thiamine metabolic pathways WP4297	Disorders of the Krebs cycle WP4236
Adjusted P-Value	4.51299e-05	6.1943e-05	0.000516781	0.0045944	0.00502564
P-Value	1.28942e-05	8.84899e-06	0.000221478	0.00328171	0.00287179
280th TOP pathway, peak marker NFE2	NFE2	MAFK	MAFG	NFE2L3
Fold Change in COVID v Flu	-0.112665	0.0325675	0.104123	0.0252775
GO Term	Ethanol metabolism resulting in production of ROS by CYP2E1 WP4269	Hematopoietic Stem Cell Differentiation WP2849	NRF2 pathway WP2884	Nuclear Receptors Meta-Pathway WP2882
Adjusted P-Value	4.54593e-05	0.0585447	0.0875213	0.137864
P-Value	1.13648e-05	0.0292724	0.065641	0.137864
281th TOP pathway, peak marker ITGB7	ITGB7	ITGA4	ITGAE	ADAM28
Fold Change in COVID v Flu	0.10684	-0.0585953	0.0258812	0.0487973
GO Term	Hippo-Merlin Signaling Dysregulation WP4541	Integrin-mediated Cell Adhesion WP185	Focal Adhesion-PI3K-Akt-mTOR-signaling pathway WP3932	Arrhythmogenic Right Ventricular Cardiomyopathy WP2118	Focal Adhesion WP306
Adjusted P-Value	4.637e-05	5.67626e-05	0.000367879	0.0011371	0.00723178
P-Value	1.03044e-05	6.30695e-06	0.000122626	0.000505376	0.00401765
282th TOP pathway, peak marker DAGLA	DAGLA	DAGLB
Fold Change in COVID v Flu	-0.215596	-0.0637849
GO Term	Cannabinoid receptor signaling WP3869	Cell-type Dependent Selectivity of CCK2R Signaling WP3679
Adjusted P-Value	4.65204e-05	0.00451096
P-Value	2.32602e-05	0.00451096
283th TOP pathway, peak marker ERBB3	ERBB3	NRG2	NRG1
Fold Change in COVID v Flu	-0.11281	-0.011302	0.107454
GO Term	ErbB Signaling Pathway WP673	Apoptosis-related network due to altered Notch3 in ovarian cancer WP2864	Heart Development WP1591	Cardiac Progenitor Differentiation WP2406	Cardiac Hypertrophic Response WP2795
Adjusted P-Value	4.77005e-05	0.00166478	0.0367263	0.042865	0.0507991
P-Value	4.77005e-06	0.000332956	0.0183631	0.017146	0.0304795
284th TOP pathway, peak marker RUNX1	RUNX1	CBFB	RUNX3
Fold Change in COVID v Flu	-0.0569293	0.0538208	0.0232223
GO Term	Dual hijack model of Vif in HIV infection WP3300	TYROBP Causal Network WP3945	Hair Follicle Development: Cytodifferentiation (Part 3 of 3) WP2840	Endochondral Ossification WP474	Hematopoietic Stem Cell Differentiation WP2849
Adjusted P-Value	4.95137e-05	0.0425834	0.0443598	0.0522831	0.0683022
P-Value	7.07338e-06	0.0365001	0.0316856	0.029876	0.0292724
285th TOP pathway, peak marker DYNC2LI1	DYNC2LI1	DYNC2H1
Fold Change in COVID v Flu	0.0222282	0.0212786
GO Term	Intraflagellar transport proteins binding to dynein WP4532	Genes related to primary cilium development (based on CRISPR) WP4536
Adjusted P-Value	5.05657e-05	0.000417167
P-Value	2.52828e-05	0.000417167
286th TOP pathway, peak marker C4A	C4A	C4B	CR1L
Fold Change in COVID v Flu	-0.079031	-0.0726346	-0.0630481
GO Term	Complement Activation WP545	Allograft Rejection WP2328	Sudden Infant Death Syndrome (SIDS) Susceptibility Pathways WP706	Oxidative Damage WP3941	Complement and Coagulation Cascades WP558
Adjusted P-Value	5.3094e-05	0.000478098	0.00112424	0.0196256	0.0245319
P-Value	8.84899e-06	0.000159366	0.000562122	0.0163546	0.0163546
287th TOP pathway, peak marker OLIG2	OLIG2	SOX8
Fold Change in COVID v Flu	0.22301	-0.00154751
GO Term	Oligodendrocyte Specification and differentiation(including remyelination), leading to Myelin Components for CNS WP4304	Preimplantation Embryo WP3527	Neural Crest Differentiation WP2064
Adjusted P-Value	5.3094e-05	0.0220878	0.0273178
P-Value	1.7698e-05	0.0147252	0.0273178
288th TOP pathway, peak marker MPC1	MPC1	MPC2
Fold Change in COVID v Flu	0.0590299	-0.0305591
GO Term	Glycolysis and Gluconeogenesis WP534
Adjusted P-Value	5.61279e-05
P-Value	5.61279e-05
289th TOP pathway, peak marker TFAM	TFAM	NRF1
Fold Change in COVID v Flu	0.0785526	-0.0139961
GO Term	Mitochondrial Gene Expression WP391	Energy Metabolism WP1541	NAD metabolism, sirtuins and aging WP3630	Simplified Interaction Map Between LOXL4 and Oxidative Stress Pathway WP3670
Adjusted P-Value	5.76449e-05	0.00015945	0.0054684	0.00696719
P-Value	1.44112e-05	7.97252e-05	0.0041013	0.00696719
290th TOP pathway, peak marker COL6A1	COL6A1	COL6A2
Fold Change in COVID v Flu	0.0257879	-0.0092848
GO Term	miRNA targets in ECM and membrane receptors WP2911	PI3K-Akt Signaling Pathway WP4172	Focal Adhesion WP306	Focal Adhesion-PI3K-Akt-mTOR-signaling pathway WP3932
Adjusted P-Value	5.76449e-05	0.0055447	0.097239	0.0972757
P-Value	1.44112e-05	0.00277235	0.0729293	0.0972757
291th TOP pathway, peak marker CLTC	CLTC	CLTB	CLTA
Fold Change in COVID v Flu	-0.040556	-0.00224813	0.00283628
GO Term	Ebola Virus Pathway on Host WP4217	Synaptic Vesicle Pathway WP2267	Complement and Coagulation Cascades WP558	VEGFA-VEGFR2 Signaling Pathway WP3888
Adjusted P-Value	5.83198e-05	0.000475601	0.0325785	0.12722
P-Value	1.45799e-05	0.000237801	0.0244338	0.12722
292th TOP pathway, peak marker RUVBL1	RUVBL1	INO80D	RPAP3	DPCD	TFPT	ACTR5	C12orf45	RUVBL2	ZNHIT1	INO80	INO80B	INO80C	ACTR8
Fold Change in COVID v Flu	0.122132	-0.0447183	-0.034522	-0.0265139	0.0393323	0.042408	0.0791595	0.101644	-0.0328238	-0.0022427	-0.000440933	0.0287075	0.0389468
GO Term	Gastric Cancer Network 1 WP2361	LncRNA involvement in canonical Wnt signaling and colorectal cancer WP4258
Adjusted P-Value	5.91618e-05	0.0309585
P-Value	2.95809e-05	0.0309585
293th TOP pathway, peak marker CNGB1	CNGB1	NRM	CNGA4
Fold Change in COVID v Flu	-0.159237	-0.0324571	-0.0142483
GO Term	NO/cGMP/PKG mediated Neuroprotection WP4008
Adjusted P-Value	5.92461e-05
P-Value	5.92461e-05
294th TOP pathway, peak marker SECISBP2	SECISBP2	EEFSEC	SECISBP2L
Fold Change in COVID v Flu	-0.0512532	0.0318177	-0.0231998
GO Term	Selenium Metabolism and Selenoproteins WP28
Adjusted P-Value	5.92461e-05
P-Value	5.92461e-05
295th TOP pathway, peak marker IFIT1	IFIT1	IFI44L	IFI44	IFIT2	IFIT3	OAS2	DDX60	IRF6	IFI35	SAMD9L	EPSTI1	PHACTR4	RIPK4	NMI	KDF1
Fold Change in COVID v Flu	-0.639184	-0.540428	-0.532495	-0.511746	-0.492662	-0.474131	-0.368759	-0.0608447	-0.363668	-0.290569	-0.223077	-0.0863833	0.0445717	-0.177821	0.0356813
GO Term	The human immune response to tuberculosis WP4197	Non-genomic actions of 1,25 dihydroxyvitamin D3 WP4341	Hypothetical Craniofacial Development Pathway WP3655	Type II interferon signaling (IFNG) WP619	IL-2 Signaling Pathway WP49
Adjusted P-Value	6.06521e-05	0.0237615	0.0343133	0.111749	0.117275
P-Value	7.58151e-06	0.00594036	0.0128675	0.0558747	0.073297
296th TOP pathway, peak marker CCR10	CCR10	CCL28	CCR9
Fold Change in COVID v Flu	0.226903	0.055853	-0.0318345
GO Term	Chemokine signaling pathway WP3929	Peptide GPCRs WP24	GPCRs, Class A Rhodopsin-like WP455
Adjusted P-Value	6.10657e-05	0.00022463	0.00138696
P-Value	2.03552e-05	0.000149753	0.00138696
297th TOP pathway, peak marker DNMT3B	DNMT3B	DNMT1
Fold Change in COVID v Flu	0.155623	0.00568565
GO Term	Trans-sulfuration and one carbon metabolism WP2525	One Carbon Metabolism WP241	MTHFR deficiency WP4288	Hematopoietic Stem Cell Gene Regulation by GABP alpha/beta Complex WP3657	Trans-sulfuration pathway WP2333
Adjusted P-Value	6.16269e-05	7.58485e-05	8.7605e-05	0.000144112	0.00553732
P-Value	2.73897e-05	2.52828e-05	1.94678e-05	1.60125e-05	0.00369155
298th TOP pathway, peak marker OCA2	OCA2	SLC45A2
Fold Change in COVID v Flu	-0.084225	0.0249952
GO Term	Prader-Willi and Angelman Syndrome WP3998
Adjusted P-Value	6.24486e-05
P-Value	6.24486e-05
299th TOP pathway, peak marker ENDOG	ENDOG	AIFM1
Fold Change in COVID v Flu	0.064788	0.0408911
GO Term	Nanomaterial induced apoptosis WP2507	Apoptosis Modulation and Signaling WP1772	Apoptosis Modulation by HSP70 WP384	Viral Acute Myocarditis WP4298
Adjusted P-Value	6.40499e-05	0.000630554	0.0103803	0.0317666
P-Value	1.60125e-05	0.000315277	0.00778526	0.0317666
300th TOP pathway, peak marker AGPS	AGPS	GNPAT	GPD1L
Fold Change in COVID v Flu	0.0526974	0.0217246	-0.00109683
GO Term	Triacylglyceride Synthesis WP325	Glycerophospholipid Biosynthetic Pathway WP2533	Sudden Infant Death Syndrome (SIDS) Susceptibility Pathways WP706
Adjusted P-Value	6.46996e-05	0.000129399	0.0697554
P-Value	4.3133e-05	4.3133e-05	0.0697554
301th TOP pathway, peak marker PRDX6	PRDX6	PTGR1	GSTP1
Fold Change in COVID v Flu	-0.198971	0.0448945	0.0460375
GO Term	NRF2 pathway WP2884	Nuclear Receptors Meta-Pathway WP2882	Arachidonate Epoxygenase / Epoxide Hydrolase WP678	Photodynamic therapy-induced NFE2L2 (NRF2) survival signaling WP3612	Exercise-induced Circadian Regulation WP410
Adjusted P-Value	6.53929e-05	0.000332588	0.00615258	0.0202327	0.0322261
P-Value	1.08988e-05	0.000110863	0.00307629	0.0134885	0.0268551
302th TOP pathway, peak marker TNFSF12	TNFSF12	TNFRSF12A	AGGF1
Fold Change in COVID v Flu	-0.0415794	-0.0376097	0.0276987
GO Term	TNF related weak inducer of apoptosis (TWEAK) Signaling Pathway WP2036
Adjusted P-Value	6.57354e-05
P-Value	6.57354e-05
303th TOP pathway, peak marker GOT1	GOT1	GPT	GPT2
Fold Change in COVID v Flu	0.128752	0.101556	0.103768
GO Term	Alanine and aspartate metabolism WP106	Amino Acid metabolism WP3925	Cori Cycle WP1946	Cysteine and methionine catabolism WP4504	Trans-sulfuration pathway WP2333
Adjusted P-Value	6.81889e-05	0.00197393	0.00958226	0.0101393	0.0110655
P-Value	1.13648e-05	0.000657975	0.00798522	0.0067595	0.00553277
304th TOP pathway, peak marker SMYD5	SMYD5	SMYD4
Fold Change in COVID v Flu	0.124468	0.026386
GO Term	Histone Modifications WP2369
Adjusted P-Value	6.91064e-05
P-Value	6.91064e-05
305th TOP pathway, peak marker ASH2L	ASH2L	RBBP5	SETD1A	WDR5B	DPY30	WDR5	KMT2B
Fold Change in COVID v Flu	-0.0887015	-0.0302323	0.0226869	0.0227197	0.0335741	0.0519682	-0.0176401
GO Term	Histone Modifications WP2369
Adjusted P-Value	6.91064e-05
P-Value	6.91064e-05
306th TOP pathway, peak marker SETD6	SETD6	SETD4
Fold Change in COVID v Flu	0.0453134	0.0129036
GO Term	Histone Modifications WP2369
Adjusted P-Value	6.91064e-05
P-Value	6.91064e-05
307th TOP pathway, peak marker CALCRL	CALCRL	RAMP1
Fold Change in COVID v Flu	-0.073388	0.00795083
GO Term	Endothelin Pathways WP2197	GPCRs, Class B Secretin-like WP334	Myometrial Relaxation and Contraction Pathways WP289
Adjusted P-Value	6.97806e-05	0.0104508	0.0494601
P-Value	2.32602e-05	0.00696719	0.0494601
308th TOP pathway, peak marker SLC39A9	SLC39A9	SLC39A13
Fold Change in COVID v Flu	0.0356779	0.0197467
GO Term	Zinc homeostasis WP3529	NRF2 pathway WP2884	Nuclear Receptors Meta-Pathway WP2882
Adjusted P-Value	6.97806e-05	0.000744074	0.00231717
P-Value	2.32602e-05	0.000496049	0.00231717
309th TOP pathway, peak marker SLC39A7	SLC39A7	SLC30A7
Fold Change in COVID v Flu	-0.0284812	0.0269787
GO Term	Zinc homeostasis WP3529	NRF2 pathway WP2884	Nuclear Receptors Meta-Pathway WP2882
Adjusted P-Value	6.97806e-05	0.0663742	0.0941525
P-Value	2.32602e-05	0.0442494	0.0941525
310th TOP pathway, peak marker IGF1	IGF1	IGF1R	IGFBP5	IGFBP3	IGFBP2	CILP	IGFBP4	PAPPA	PTPN1	TMEM219	IGFBP7	IGF2	KLK1	PLAC8	MBP	ANP32E
Fold Change in COVID v Flu	0.301307	-0.105159	-0.0190525	0.0439626	0.0777141	0.11001	0.205916	-0.174738	-0.0668335	-0.0329922	-0.0213216	-0.0165583	0.014299	-0.0880665	-0.0775935	0.146
GO Term	Senescence and Autophagy in Cancer WP615	Factors and pathways affecting insulin-like growth factor (IGF1)-Akt signaling WP3850	Endochondral Ossification WP474	Myometrial Relaxation and Contraction Pathways WP289	Oligodendrocyte Specification and differentiation(including remyelination), leading to Myelin Components for CNS WP4304
Adjusted P-Value	7.0663e-05	0.000925843	0.00227009	0.00243189	0.00872515
P-Value	1.53615e-06	4.0254e-05	0.000197399	0.000158601	0.00113806
311th TOP pathway, peak marker PDE6B	PDE6B	PDE6G
Fold Change in COVID v Flu	0.0313117	-0.00188398
GO Term	Phosphodiesterases in neuronal function WP4222
Adjusted P-Value	7.25617e-05
P-Value	7.25617e-05
312th TOP pathway, peak marker EXO1	EXO1	DNA2	MSH2	PMS2	MSH3	MUTYH	PMS1	SNX8
Fold Change in COVID v Flu	0.325371	0.11882	0.122734	0.0166266	0.0580042	0.0758137	0.108694	0.000494129
GO Term	DNA Mismatch Repair WP531	DNA IR-damage and cellular response via ATR WP4016	Chromosomal and microsatellite instability in colorectal cancer WP4216	RAC1/PAK1/p38/MMP2 Pathway WP3303	Integrated Cancer Pathway WP1971
Adjusted P-Value	7.27448e-05	0.00210775	0.00248938	0.0502683	0.0525003
P-Value	9.0931e-06	0.000790407	0.000622344	0.0377012	0.0262502
313th TOP pathway, peak marker KPNB1	KPNB1	KPNA6	SNUPN	KPNA1	MROH8	KPNA5	RAN	KPNA2	TNPO3	XPO1	RANGAP1	RANBP2	IPO13	RANBP6	XPO5	RCC1L	RANGRF	RANBP1	XPOT	NUTF2	RCC1	NEK3	TRMT2A	NTMT1	XPO4	KLHL31
Fold Change in COVID v Flu	-0.251105	-0.0226691	0.0110693	0.0262867	0.112863	0.121472	0.132928	0.192675	-0.117537	-0.0666672	-0.0393248	0.0225857	0.0368297	0.042006	0.0432554	0.0437383	0.0514416	0.10839	0.114584	0.120641	0.132117	0.00601155	0.0130371	0.0321732	0.0591524	-0.0208808
GO Term	miRNA Biogenesis WP2338	exRNA mechanism of action and biogenesis WP2805	Androgen receptor signaling pathway WP138	Prolactin Signaling Pathway WP2037	Ebola Virus Pathway on Host WP4217
Adjusted P-Value	7.5724e-05	0.018435	0.103425	0.110552	0.117279
P-Value	1.26207e-05	0.006145	0.0861875	0.0737013	0.117279
314th TOP pathway, peak marker IFT27	IFT27	HSPB11
Fold Change in COVID v Flu	0.0612299	0.0208309
GO Term	Intraflagellar transport proteins binding to dynein WP4532	Genes related to primary cilium development (based on CRISPR) WP4536	Ciliary landscape WP4352
Adjusted P-Value	7.58485e-05	0.00062575	0.00176221
P-Value	2.52828e-05	0.000417167	0.00176221
315th TOP pathway, peak marker TCTEX1D2	TCTEX1D2	WDR60
Fold Change in COVID v Flu	0.159295	0.0599151
GO Term	Intraflagellar transport proteins binding to dynein WP4532	Genes related to primary cilium development (based on CRISPR) WP4536	Ciliary landscape WP4352
Adjusted P-Value	7.58485e-05	0.00062575	0.00176221
P-Value	2.52828e-05	0.000417167	0.00176221
316th TOP pathway, peak marker DYNLL1	DYNLL1	DYNLL2	DNHD1
Fold Change in COVID v Flu	0.107248	0.0230883	0.00985995
GO Term	Intraflagellar transport proteins binding to dynein WP4532	Ciliary landscape WP4352	Genes related to primary cilium development (based on CRISPR) WP4536
Adjusted P-Value	7.58485e-05	0.00264332	0.0406337
P-Value	2.52828e-05	0.00176221	0.0406337
317th TOP pathway, peak marker ATP7A	ATP7A	PDZD11	ATOX1
Fold Change in COVID v Flu	-0.10193	-0.0109931	0.0372883
GO Term	Copper homeostasis WP3286
Adjusted P-Value	7.61013e-05
P-Value	7.61013e-05
318th TOP pathway, peak marker TLR2	TLR2	TLR1	CD14
Fold Change in COVID v Flu	-0.332467	-0.126584	0.0265642
GO Term	Toll-like Receptor Signaling Pathway WP75	Regulation of toll-like receptor signaling pathway WP1449	Simplified Depiction of MYD88 Distinct Input-Output Pathway WP3877	IL1 and megakaryocytes in obesity WP2865	Toll-like Receptor Signaling WP3858
Adjusted P-Value	7.63207e-05	0.000105268	0.000183008	0.000255127	0.000374715
P-Value	4.77005e-06	1.31585e-05	3.43141e-05	6.37817e-05	0.000117098
319th TOP pathway, peak marker KEAP1	KEAP1	NFE2L2	NFE2L1	DPP3
Fold Change in COVID v Flu	0.0660859	-0.0427572	-0.0399934	0.0479464
GO Term	Photodynamic therapy-induced NFE2L2 (NRF2) survival signaling WP3612	NRF2-ARE regulation WP4357	Hereditary leiomyomatosis and renal cell carcinoma pathway WP4206	Phytochemical activity on NRF2 transcriptional activation WP3	NRF2 pathway WP2884
Adjusted P-Value	7.78711e-05	0.000103828	0.00011529	0.000122706	0.00158736
P-Value	1.94678e-05	1.94678e-05	1.44112e-05	7.66913e-06	0.000496049
320th TOP pathway, peak marker UNC13A	UNC13A	BSN	UNC13C	TPRG1L	ARMCX2
Fold Change in COVID v Flu	-0.167825	-0.0862767	-0.045451	-0.0427065	0.0835899
GO Term	Synaptic Vesicle Pathway WP2267
Adjusted P-Value	7.97252e-05
P-Value	7.97252e-05
321th TOP pathway, peak marker PTGS1	PTGS1	ALOX12
Fold Change in COVID v Flu	0.157399	0.151558
GO Term	Eicosanoid Synthesis WP167	Effects of Nitric Oxide WP1995	Overview of nanoparticle effects WP3287	Prostaglandin Synthesis and Regulation WP98	Selenium Micronutrient Network WP15
Adjusted P-Value	8.02309e-05	0.0100513	0.0162568	0.0243425	0.0365437
P-Value	1.14616e-05	0.00287179	0.00696719	0.01391	0.0261027
322th TOP pathway, peak marker TOB1	TOB1	CPEB3	CNOT7	CPEB2	CNOT1	CNOT6L	CNOT3	TOB2	CNOT2	TNKS1BP1	BTG2	CNOT6	CNOT9	ZNF335	LRRC27	CNOT11	PDE12	CNOT10
Fold Change in COVID v Flu	-0.231194	-0.221427	0.100233	-0.165694	-0.0684484	-0.0294916	-0.0281667	0.00268979	0.0095893	0.0305944	0.0357935	0.0634404	0.0800487	0.0262717	0.0305494	0.0426746	0.0658809	-0.0289399
GO Term	Ciliary landscape WP4352	Bone Morphogenic Protein (BMP) Signalling and Regulation WP1425	Exercise-induced Circadian Regulation WP410	Genotoxicity pathway WP4286	Phosphodiesterases in neuronal function WP4222
Adjusted P-Value	8.2766e-05	0.000496299	0.117702	0.120695	0.150047
P-Value	1.37943e-05	0.000165433	0.0784677	0.100579	0.0750235
323th TOP pathway, peak marker APP	APP	BACE1	LRP1B	MXRA8	APBB1	APLP2	APLP1
Fold Change in COVID v Flu	0.0620669	-0.0610281	-0.0467383	0.00382274	0.0521924	-0.0468933	-0.0012851
GO Term	Alzheimers Disease WP2059	Copper homeostasis WP3286	Apoptosis-related network due to altered Notch3 in ovarian cancer WP2864	Splicing factor NOVA regulated synaptic proteins WP4148	TGF-beta Signaling Pathway WP366
Adjusted P-Value	8.32011e-05	0.0013545	0.0630405	0.0648967	0.0995334
P-Value	1.38669e-05	0.000451498	0.042027	0.0324484	0.0995334
324th TOP pathway, peak marker ICAM1	ICAM1	ITGAL
Fold Change in COVID v Flu	0.0946849	-0.0639652
GO Term	Cells and Molecules involved in local acute inflammatory response WP4493	RANKL/RANK (Receptor activator of NFKB (ligand)) Signaling Pathway WP2018	Vitamin B12 Metabolism WP1533	Interleukin-11 Signaling Pathway WP2332	Folate Metabolism WP176
Adjusted P-Value	8.34334e-05	0.03676	0.0368169	0.037714	0.0392187
P-Value	4.63519e-06	0.0204222	0.0143177	0.0167618	0.0196094
325th TOP pathway, peak marker CD86	CD86	CTLA4	CD83	FOXP3
Fold Change in COVID v Flu	-0.163405	0.0656884	0.137612	0.00684315
GO Term	Macrophage markers WP4146	Allograft Rejection WP2328	T-Cell Receptor and Co-stimulatory Signaling WP2583	Inflammatory Response Pathway WP453	PI3K/AKT/mTOR - VitD3 Signalling WP4141
Adjusted P-Value	8.48108e-05	9.33888e-05	0.0527775	0.0562676	0.0652981
P-Value	1.41351e-05	7.7824e-06	0.0219906	0.0187559	0.0163245
326th TOP pathway, peak marker GPAM	GPAM	AGPAT2	GPAT2
Fold Change in COVID v Flu	0.0602015	-0.0415617	0.0149504
GO Term	Triacylglyceride Synthesis WP325	Estrogen Receptor Pathway WP2881	Sterol Regulatory Element-Binding Proteins (SREBP) signalling WP1982	Adipogenesis WP236	Nuclear Receptors Meta-Pathway WP2882
Adjusted P-Value	8.64673e-05	0.0110746	0.051395	0.063965	0.0941525
P-Value	1.44112e-05	0.00369155	0.0256975	0.0426433	0.0941525
327th TOP pathway, peak marker MITF	MITF	PAX3	DCT	TFE3
Fold Change in COVID v Flu	0.120765	-0.0509232	-0.048736	-0.0441038
GO Term	Neural Crest Differentiation WP2064	Kit receptor signaling pathway WP304	MET in type 1 papillary renal cell carcinoma WP4205	RANKL/RANK (Receptor activator of NFKB (ligand)) Signaling Pathway WP2018	Prostaglandin Synthesis and Regulation WP98
Adjusted P-Value	8.86498e-05	0.0581195	0.0666158	0.072784	0.0828965
P-Value	9.84997e-06	0.045204	0.0444105	0.0404355	0.0276322
328th TOP pathway, peak marker CD8A	CD8A	CD8B
Fold Change in COVID v Flu	0.0891497	0.0538481
GO Term	T-Cell Receptor and Co-stimulatory Signaling WP2583	T-Cell antigen Receptor (TCR) pathway during Staphylococcus aureus infection WP3863	T-Cell antigen Receptor (TCR) Signaling Pathway WP69
Adjusted P-Value	8.87428e-05	0.0342881	0.0345924
P-Value	2.95809e-05	0.0228587	0.0345924
329th TOP pathway, peak marker G6PD	G6PD	HK1
Fold Change in COVID v Flu	-0.0891993	-0.0546594
GO Term	Cori Cycle WP1946	Sulfation Biotransformation Reaction WP692	Pentose Phosphate Metabolism WP134	Glutathione metabolism WP100	Glucuronidation WP698
Adjusted P-Value	9.20295e-05	0.011486	0.0134017	0.0172166	0.0201026
P-Value	6.57354e-06	0.00328171	0.00287179	0.00614879	0.00287179
330th TOP pathway, peak marker SLC39A4	SLC39A4	SLC39A1
Fold Change in COVID v Flu	0.0522839	-0.0155013
GO Term	Zinc homeostasis WP3529	NRF2 pathway WP2884	Senescence and Autophagy in Cancer WP615	Nuclear Receptors Meta-Pathway WP2882
Adjusted P-Value	9.30408e-05	0.000661399	0.00070556	0.00231717
P-Value	2.32602e-05	0.000496049	0.00035278	0.00231717
331th TOP pathway, peak marker S100A10	S100A10	ANXA2R	ANXA2	PLGRKT	AHNAK
Fold Change in COVID v Flu	0.0687659	-0.0566167	0.00950315	0.0204012	0.0276254
GO Term	Prostaglandin Synthesis and Regulation WP98	Metabolic pathway of LDL, HDL and TG, including diseases WP4522
Adjusted P-Value	9.45578e-05	0.00492055
P-Value	4.72789e-05	0.00492055
332th TOP pathway, peak marker DYSF	DYSF	TRIM72	ANXA8	ANXA4	ANXA6
Fold Change in COVID v Flu	-0.171838	-0.145311	-0.00617922	0.0122281	0.0319695
GO Term	Prostaglandin Synthesis and Regulation WP98	Calcium Regulation in the Cardiac Cell WP536
Adjusted P-Value	9.45578e-05	0.0446508
P-Value	4.72789e-05	0.0446508
333th TOP pathway, peak marker ACTN2	ACTN2	LDB3	TPM2	XIRP2
Fold Change in COVID v Flu	-0.138647	-0.0604829	0.0540445	0.0592065
GO Term	Striated Muscle Contraction Pathway WP383	NO/cGMP/PKG mediated Neuroprotection WP4008	Arrhythmogenic Right Ventricular Cardiomyopathy WP2118
Adjusted P-Value	9.55691e-05	0.0233101	0.0261027
P-Value	3.18564e-05	0.0155401	0.0261027
334th TOP pathway, peak marker PINK1	PINK1	RHOT2	PRKN	MFN2	GDAP1
Fold Change in COVID v Flu	-0.0859871	-0.0282877	0.00325284	0.0329422	-0.0188628
GO Term	Parkinsons Disease Pathway WP2371	Parkin-Ubiquitin Proteasomal System pathway WP2359
Adjusted P-Value	0.000100289	0.0244814
P-Value	5.01443e-05	0.0244814
335th TOP pathway, peak marker NAMPT	NAMPT	BST1
Fold Change in COVID v Flu	-0.13361	-0.0989702
GO Term	NAD+ biosynthetic pathways WP3645	NAD+ metabolism WP3644	Tryptophan catabolism leading to NAD+ production WP4210	NAD metabolism, sirtuins and aging WP3630	Caloric restriction and aging WP4191
Adjusted P-Value	0.000100879	0.00803524	0.00932758	0.0095697	0.011486
P-Value	1.44112e-05	0.00573946	0.00533004	0.0041013	0.00328171
336th TOP pathway, peak marker MTHFD2	MTHFD2	MTFMT
Fold Change in COVID v Flu	0.0451658	-0.0110107
GO Term	One Carbon Metabolism WP241	Trans-sulfuration and one carbon metabolism WP2525	Nucleotide Metabolism WP404	Folate Metabolism WP176
Adjusted P-Value	0.000101131	0.0141945	0.0155705	0.0196094
P-Value	2.52828e-05	0.0106458	0.00778526	0.0196094
337th TOP pathway, peak marker PYCR1	PYCR1	NUDT5	PYCR2	PYCR3	NUDT13	NUDT1	NUDT18	NUDT9	NUDT15	DTWD2	PHPT1
Fold Change in COVID v Flu	0.443903	-0.0991922	0.049238	0.162515	-0.0511536	-0.0346804	-0.0126403	0.0677438	0.0865322	0.0147028	0.035796
GO Term	Urea cycle and metabolism of amino groups WP497	Metabolic reprogramming in colon cancer WP4290	Amino Acid metabolism WP3925
Adjusted P-Value	0.000102942	0.000309319	0.0442895
P-Value	3.43141e-05	0.000206212	0.0442895
338th TOP pathway, peak marker FH	FH	MDH2	ME2
Fold Change in COVID v Flu	0.123868	0.033789	0.0119399
GO Term	TCA Cycle (aka Krebs or citric acid cycle) WP78	Metabolic reprogramming in colon cancer WP4290	Amino Acid metabolism WP3925	Disorders of the Krebs cycle WP4236	Cerebral Organic Acidurias, including diseases WP4519
Adjusted P-Value	0.000103154	0.000276426	0.000590607	0.00459487	0.00574359
P-Value	1.28942e-05	6.91064e-05	0.000221478	0.00287179	0.00287179
339th TOP pathway, peak marker HMOX1	HMOX1	NQO1
Fold Change in COVID v Flu	-0.152845	0.121708
GO Term	Photodynamic therapy-induced NFE2L2 (NRF2) survival signaling WP3612	Oxidative Stress WP408	Phytochemical activity on NRF2 transcriptional activation WP3	NRF2-ARE regulation WP4357	NRF2 pathway WP2884
Adjusted P-Value	0.000110317	0.000116406	0.000130375	0.000165476	0.00168657
P-Value	1.94678e-05	2.73897e-05	7.66913e-06	1.94678e-05	0.000496049
340th TOP pathway, peak marker MAOA	MAOA	COMT	CYP2D6
Fold Change in COVID v Flu	-0.196217	-0.058446	0.0349234
GO Term	Dopamine metabolism WP2436	Biogenic Amine Synthesis WP550	Melatonin metabolism and effects WP3298	Metapathway biotransformation Phase I and II WP702	Methylation Pathways WP704
Adjusted P-Value	0.000111107	0.000181837	0.000471675	0.0041812	0.00615258
P-Value	1.38884e-05	1.13648e-05	8.84391e-05	0.0010453	0.00307629
341th TOP pathway, peak marker MRTFA	MRTFA	SRF	SCAI	ELK1
Fold Change in COVID v Flu	-0.176494	0.0213016	0.0898921	0.0142313
GO Term	SRF and miRs in Smooth Muscle Differentiation and Proliferation WP1991	Serotonin Receptor 4/6/7 and NR3C Signaling WP734	Serotonin Receptor 2 and ELK-SRF/GATA4 signaling WP732	PDGFR-beta pathway WP3972	PDGF Pathway WP2526
Adjusted P-Value	0.000112256	0.000177738	0.000212039	0.000316499	0.00046212
P-Value	3.03394e-06	1.44112e-05	1.14616e-05	3.42161e-05	6.24486e-05
342th TOP pathway, peak marker CD40LG	CD40LG	CD40
Fold Change in COVID v Flu	0.124338	0.0377544
GO Term	Platelet-mediated interactions with vascular and circulating cells WP4462	Inflammatory Response Pathway WP453	Non-genomic actions of 1,25 dihydroxyvitamin D3 WP4341	Allograft Rejection WP2328	NLR Proteins WP288
Adjusted P-Value	0.000115037	0.000138592	0.000569707	0.000690587	0.00959802
P-Value	8.84899e-06	2.13219e-05	0.000175294	0.000159366	0.00369155
343th TOP pathway, peak marker COL4A2	COL4A2	COL4A1
Fold Change in COVID v Flu	-0.185402	-0.0744667
GO Term	miRNA targets in ECM and membrane receptors WP2911	Epithelial to mesenchymal transition in colorectal cancer WP4239	Focal Adhesion WP306	PI3K-Akt Signaling Pathway WP4172	Focal Adhesion-PI3K-Akt-mTOR-signaling pathway WP3932
Adjusted P-Value	0.00011529	0.00261256	0.00366096	0.00443576	0.00495594
P-Value	1.44112e-05	0.00065314	0.00137286	0.00277235	0.00247797
344th TOP pathway, peak marker CACYBP	CACYBP	S100A6
Fold Change in COVID v Flu	0.0961051	-0.0511468
GO Term	Gastric Cancer Network 2 WP2363	Prostaglandin Synthesis and Regulation WP98	Vitamin D Receptor Pathway WP2877
Adjusted P-Value	0.000117565	0.020865	0.0490597
P-Value	3.91884e-05	0.01391	0.0490597
345th TOP pathway, peak marker EVC2	EVC2	STK32B	EVC	DIP2C
Fold Change in COVID v Flu	0.107159	0.0169081	0.0850596	-0.000978052
GO Term	Hedgehog Signaling Pathway WP4249	Genes related to primary cilium development (based on CRISPR) WP4536
Adjusted P-Value	0.000118492	0.000417167
P-Value	5.92461e-05	0.000417167
346th TOP pathway, peak marker SELENOT	SELENOT	SELENOH
Fold Change in COVID v Flu	0.0270577	0.0242402
GO Term	Selenium Metabolism and Selenoproteins WP28	Selenium Micronutrient Network WP15
Adjusted P-Value	0.000118492	0.000169901
P-Value	5.92461e-05	0.000169901
347th TOP pathway, peak marker RGS14	RGS14	GNAI1	RIC8A	RGS18
Fold Change in COVID v Flu	-0.108449	-0.0166519	-0.00906822	-0.00251822
GO Term	Calcium Regulation in the Cardiac Cell WP536	Myometrial Relaxation and Contraction Pathways WP289	Nicotine Activity on Dopaminergic Neurons WP1602	Cell-type Dependent Selectivity of CCK2R Signaling WP3679	Common Pathways Underlying Drug Addiction WP2636
Adjusted P-Value	0.000123248	0.0100951	0.0236437	0.0247848	0.0269437
P-Value	1.12044e-05	0.00183547	0.0085977	0.0067595	0.017146
348th TOP pathway, peak marker RARG	RARG	CRABP2
Fold Change in COVID v Flu	0.0818541	0.0372166
GO Term	Vitamin A and Carotenoid Metabolism WP716	Nuclear Receptors in Lipid Metabolism and Toxicity WP299	Nuclear Receptors WP170	Mesodermal Commitment Pathway WP2857	Endoderm Differentiation WP2853
Adjusted P-Value	0.000126414	0.0204854	0.0211443	0.0466561	0.0583201
P-Value	2.52828e-05	0.00819417	0.0126866	0.0466561	0.0466561
349th TOP pathway, peak marker ACTA2	ACTA2	MYH11	TPM4
Fold Change in COVID v Flu	-0.120813	0.00836044	0.0377941
GO Term	Striated Muscle Contraction Pathway WP383	Genotoxicity pathway WP4286	Mechanoregulation and pathology of YAP/TAZ via Hippo and non-Hippo mechanisms WP4534	Myometrial Relaxation and Contraction Pathways WP289
Adjusted P-Value	0.000127426	0.0310193	0.0343376	0.0494601
P-Value	3.18564e-05	0.0232645	0.0171688	0.0494601
350th TOP pathway, peak marker MCL1	MCL1	BOK	RTL10
Fold Change in COVID v Flu	-0.193654	-0.00862039	0.0159247
GO Term	Regulation of Apoptosis by Parathyroid Hormone-related Protein WP3872	Apoptosis Modulation and Signaling WP1772	Apoptosis WP254	Hematopoietic Stem Cell Gene Regulation by GABP alpha/beta Complex WP3657	TP53 Network WP1742
Adjusted P-Value	0.0001281	0.000840739	0.00117515	0.0131107	0.0147525
P-Value	1.60125e-05	0.000315277	0.000293787	0.00819417	0.00737627
351th TOP pathway, peak marker SLC1A7	SLC1A7	SLC6A16	SLC6A18	SLC38A2	SLC6A20
Fold Change in COVID v Flu	0.100842	-0.0754628	0.0007175	0.0221806	0.0726872
GO Term	NRF2 pathway WP2884	Nuclear Receptors Meta-Pathway WP2882	Endochondral Ossification WP474
Adjusted P-Value	0.00012865	0.000641405	0.039639
P-Value	4.28835e-05	0.000427603	0.039639
352th TOP pathway, peak marker IL5RA	IL5RA	CSF2RB	UNC119	SIDT1
Fold Change in COVID v Flu	0.196471	-0.119652	-0.0921147	0.0774677
GO Term	IL-3 Signaling Pathway WP286	IL-5 Signaling Pathway WP127	Inflammatory Response Pathway WP453
Adjusted P-Value	0.000130839	0.000177738	0.00942039
P-Value	8.72258e-05	5.92461e-05	0.00942039
353th TOP pathway, peak marker GPI	GPI	PGM1	PFKP	MPI	PGM2L1	PMM1	GDPGP1
Fold Change in COVID v Flu	0.0844778	-0.0179161	0.0521608	0.0662792	-0.00940034	0.0346056	0.0649577
GO Term	Pathways in clear cell renal cell carcinoma WP4018	Cori Cycle WP1946	Glycolysis and Gluconeogenesis WP534	Glucuronidation WP698	Glycosylation and related congenital defects. WP4521
Adjusted P-Value	0.000134873	0.00015729	0.000889463	0.011473	0.0313045
P-Value	1.68591e-05	3.93225e-05	0.000333549	0.00573651	0.0195653
354th TOP pathway, peak marker CHDH	CHDH	ALDH7A1
Fold Change in COVID v Flu	0.0609345	0.00549403
GO Term	MTHFR deficiency WP4288	Vitamin B6-dependent and responsive disorders WP4228	Cerebral Organic Acidurias, including diseases WP4519	Methionine De Novo and Salvage Pathway WP3580	One Carbon Metabolism WP241
Adjusted P-Value	0.000136275	0.00574536	0.00670085	0.0136242	0.0143324
P-Value	1.94678e-05	0.00164153	0.00287179	0.00778526	0.0102374
355th TOP pathway, peak marker DPYD	DPYD	UMPS
Fold Change in COVID v Flu	-0.14225	0.0706169
GO Term	Fluoropyrimidine Activity WP1601	Pyrimidine metabolism WP4022	Pyrimidine metabolism and related diseases WP4225	TYROBP Causal Network WP3945
Adjusted P-Value	0.000136864	0.000532625	0.00382906	0.0244814
P-Value	3.42161e-05	0.000266313	0.00287179	0.0244814
356th TOP pathway, peak marker FLT1	FLT1	PGF	VEGFA	VEGFB	MAGED2	NRP2	ZFPL1	TEX264	TBX1	DNAJC4
Fold Change in COVID v Flu	0.255913	-0.0244973	0.0737697	0.1063	-0.0252787	-0.0149866	-0.0113749	0.00758755	0.0263527	0.0544489
GO Term	Heart Development WP1591	MicroRNA for Targeting Cancer Growth and Vascularization in Glioblastoma WP3593	Focal Adhesion WP306	VEGFA-VEGFR2 Signaling Pathway WP3888	Focal Adhesion-PI3K-Akt-mTOR-signaling pathway WP3932
Adjusted P-Value	0.000137384	0.000291218	0.000430407	0.000433667	0.00055235
P-Value	4.16316e-06	2.64744e-05	2.60853e-05	5.25657e-05	8.36895e-05
357th TOP pathway, peak marker TAF4	TAF4	TAF5	TAF12
Fold Change in COVID v Flu	0.0602577	0.0220941	0.031277
GO Term	Eukaryotic Transcription Initiation WP405	Endoderm Differentiation WP2853
Adjusted P-Value	0.000138213	0.0466561
P-Value	6.91064e-05	0.0466561
358th TOP pathway, peak marker GNMT	GNMT	DMGDH
Fold Change in COVID v Flu	0.0445564	-0.00168539
GO Term	One carbon metabolism and related pathways WP3940	Methionine metabolism leading to Sulphur Amino Acids and related disorders WP4292
Adjusted P-Value	0.000138213	0.00287179
P-Value	6.91064e-05	0.00287179
359th TOP pathway, peak marker ADK	ADK	AMPD3	AK1	AK8	PDE8A	AK7	SPEF2	PDE7B	ADA	AK9	PDE7A	APRT	AK2	PNP	RDH14	AK5
Fold Change in COVID v Flu	0.0775651	-0.0526413	-0.0487232	-0.0375196	-0.0316983	-0.0179115	0.0223271	0.0256595	0.0383896	0.0429648	0.0476782	0.0504538	0.0530377	-0.0147341	0.0203012	0.034898
GO Term	Phosphodiesterases in neuronal function WP4222	G Protein Signaling Pathways WP35	Purine metabolism WP4224	Ectoderm Differentiation WP2858	Methionine metabolism leading to Sulphur Amino Acids and related disorders WP4292
Adjusted P-Value	0.000142541	0.000263021	0.000338593	0.0152809	0.0175356
P-Value	2.03631e-05	0.000112723	9.67408e-05	0.0109149	0.0100204
360th TOP pathway, peak marker PDE1B	PDE1B	PDE1C
Fold Change in COVID v Flu	-0.14048	-0.100181
GO Term	Phosphodiesterases in neuronal function WP4222	G Protein Signaling Pathways WP35
Adjusted P-Value	0.000145123	0.00022763
P-Value	7.25617e-05	0.00022763
361th TOP pathway, peak marker COL9A2	COL9A2	COL9A1	COL9A3
Fold Change in COVID v Flu	-0.569608	-0.0852524	0.0573945
GO Term	PI3K-Akt Signaling Pathway WP4172	Gastric Cancer Network 2 WP2363
Adjusted P-Value	0.000145164	0.000234197
P-Value	0.000145164	0.000117098
362th TOP pathway, peak marker TUBB2A	TUBB2A	TUBA4A	TTL	EML2
Fold Change in COVID v Flu	-0.278688	-0.0339302	-0.0264349	-0.0159468
GO Term	Parkin-Ubiquitin Proteasomal System pathway WP2359	Pathogenic Escherichia coli infection WP2272
Adjusted P-Value	0.000149169	0.000182205
P-Value	0.000149169	9.11025e-05
363th TOP pathway, peak marker MOB1A	MOB1A	STK38L	STK4	MOB2	NDRG2
Fold Change in COVID v Flu	-0.0603672	-0.0165047	0.0455375	0.00984076	0.0150811
GO Term	Hippo-Yap signaling pathway WP4537	Non-small cell lung cancer WP4255	Mechanoregulation and pathology of YAP/TAZ via Hippo and non-Hippo mechanisms WP4534	Hippo-Merlin Signaling Dysregulation WP4541	Pathways Regulating Hippo Signaling WP4540
Adjusted P-Value	0.000149253	0.0599608	0.0600909	0.0608252	0.0619483
P-Value	2.13219e-05	0.0256975	0.0171688	0.0434465	0.035399
364th TOP pathway, peak marker IL2RG	IL2RG	IL2RB
Fold Change in COVID v Flu	-0.0548005	0.0389703
GO Term	Inflammatory Response Pathway WP453	IL-2 Signaling Pathway WP49	PI3K-Akt Signaling Pathway WP4172	Focal Adhesion-PI3K-Akt-mTOR-signaling pathway WP3932	IL-9 Signaling Pathway WP22
Adjusted P-Value	0.000149253	0.000241872	0.00485161	0.00578193	0.00803524
P-Value	2.13219e-05	6.91064e-05	0.00277235	0.00247797	0.00573946
365th TOP pathway, peak marker CYP26B1	CYP26B1	ALDH1A2	RDH16
Fold Change in COVID v Flu	-0.112993	0.0168662	-0.0157296
GO Term	Vitamin A and Carotenoid Metabolism WP716	Tryptophan metabolism WP465	Oxidation by Cytochrome P450 WP43	Ethanol effects on histone modifications WP3996	Adipogenesis WP236
Adjusted P-Value	0.000151697	0.0202535	0.0237411	0.0307123	0.0426433
P-Value	2.52828e-05	0.0135023	0.0118705	0.0102374	0.0426433
366th TOP pathway, peak marker CNR1	CNR1	GPR55	CNR2	ZC3H12D
Fold Change in COVID v Flu	0.018865	0.00831542	0.0074874	-0.00319448
GO Term	Small Ligand GPCRs WP247	Cannabinoid receptor signaling WP3869	GPCRs, Other WP117	GPCRs, Class A Rhodopsin-like WP455	Cell-type Dependent Selectivity of CCK2R Signaling WP3679
Adjusted P-Value	0.000160787	0.000243497	0.000505151	0.00242718	0.0094633
P-Value	2.29696e-05	6.95705e-05	0.000216493	0.00138696	0.0067595
367th TOP pathway, peak marker IL7	IL7	IL7R
Fold Change in COVID v Flu	0.210418	-0.0544614
GO Term	IL-7 Signaling Pathway WP205	PI3K-Akt Signaling Pathway WP4172	Cytokines and Inflammatory Response WP530	Development and heterogeneity of the ILC family WP3893	Thymic Stromal LymphoPoietin (TSLP) Signaling Pathway WP2203
Adjusted P-Value	0.000162821	0.00970322	0.0124368	0.0143398	0.0246061
P-Value	2.32602e-05	0.00277235	0.00533004	0.00819417	0.0175758
368th TOP pathway, peak marker KRAS	KRAS	NRAS
Fold Change in COVID v Flu	0.0473772	-0.00839403
GO Term	Inhibition of exosome biogenesis and secretion by Manumycin A in CRPC cells WP4301	RalA downstream regulated genes WP2290	PI3K-AKT-mTOR signaling pathway and therapeutic opportunities WP3844	BDNF-TrkB Signaling WP3676	MAPK Cascade WP422
Adjusted P-Value	0.000163327	0.000176137	0.000185745	0.000211365	0.000216702
P-Value	1.28942e-05	4.63519e-06	3.42161e-05	4.44978e-05	3.42161e-05
369th TOP pathway, peak marker SEC24A	SEC24A	SAR1B
Fold Change in COVID v Flu	0.058347	0.0465939
GO Term	Sterol Regulatory Element-Binding Proteins (SREBP) signalling WP1982
Adjusted P-Value	0.000164591
P-Value	0.000164591
370th TOP pathway, peak marker SEC24D	SEC24D	SEC23A
Fold Change in COVID v Flu	-0.0871649	0.0292729
GO Term	Sterol Regulatory Element-Binding Proteins (SREBP) signalling WP1982
Adjusted P-Value	0.000164591
P-Value	0.000164591
371th TOP pathway, peak marker TEAD1	TEAD1	WWTR1
Fold Change in COVID v Flu	-0.0389911	-0.00192274
GO Term	Hippo-Yap signaling pathway WP4537	Mechanoregulation and pathology of YAP/TAZ via Hippo and non-Hippo mechanisms WP4534	Pathways Regulating Hippo Signaling WP4540	Hippo-Merlin Signaling Dysregulation WP4541	miR-509-3p alteration of YAP1/ECM axis WP3967
Adjusted P-Value	0.000170575	0.000290247	0.000840739	0.00095586	0.00721754
P-Value	2.13219e-05	7.25617e-05	0.000315277	0.00047793	0.00451096
372th TOP pathway, peak marker SLC6A1	SLC6A1	CASTOR3	SLC6A11
Fold Change in COVID v Flu	-0.0870424	0.0515049	-0.0166558
GO Term	GABA receptor Signaling WP4159	NRF2 pathway WP2884	Nuclear Receptors Meta-Pathway WP2882	Gastric Cancer Network 1 WP2361	Monoamine Transport WP727
Adjusted P-Value	0.00017157	0.00366588	0.0112163	0.016537	0.0191479
P-Value	3.43141e-05	0.00146635	0.00672979	0.016537	0.0153184
373th TOP pathway, peak marker NCOA2	NCOA2	NR5A2	CALCOCO1	NR3C1	TTLL5	KMT5B	AR	GGN	ZMIZ2	NCOA4	APPBP2	TCF20	RAD54L2
Fold Change in COVID v Flu	-0.193677	-0.108422	-0.0425661	-0.0387271	-0.0131161	0.000948343	0.113369	-0.101607	-0.00476984	-0.00132077	0.0144271	0.0239236	0.031606
GO Term	Nuclear Receptors WP170	Androgen receptor signaling pathway WP138	Sudden Infant Death Syndrome (SIDS) Susceptibility Pathways WP706	Vitamin D in inflammatory diseases WP4482	Transcription factor regulation in adipogenesis WP3599
Adjusted P-Value	0.000176608	0.00201114	0.0600322	0.065567	0.065995
P-Value	8.02763e-06	0.000182831	0.0109149	0.0298032	0.026998
374th TOP pathway, peak marker MEF2A	MEF2A	EP300	CMYA5	ELF3	PRDM2	KMT2A	SETD5
Fold Change in COVID v Flu	-0.353578	-0.0878185	0.0154063	-0.0624977	-0.0205826	0.0611697	0.00797501
GO Term	Histone Modifications WP2369	Energy Metabolism WP1541	Circadian rhythm related genes WP3594	Cell Differentiation - Index expanded WP2023	Cell Differentiation - Index WP2029
Adjusted P-Value	0.000180497	0.0129292	0.051277	0.057796	0.0591214
P-Value	5.4696e-06	0.000783587	0.0093231	0.0122598	0.00716623
375th TOP pathway, peak marker MMP9	MMP9	OSCAR	SCUBE3	TIMP1
Fold Change in COVID v Flu	0.245559	-0.143478	0.0845381	0.096942
GO Term	Matrix Metalloproteinases WP129	IL1 and megakaryocytes in obesity WP2865	Lung fibrosis WP3624	Osteopontin Signaling WP1434	Mammary gland development pathway - Puberty (Stage 2 of 4) WP2814
Adjusted P-Value	0.000182036	0.000191897	0.000570381	0.0159901	0.017714
P-Value	1.01131e-05	2.13219e-05	9.50635e-05	0.00533004	0.00492055
376th TOP pathway, peak marker MSMO1	MSMO1	LBR	HSD17B7	NSDHL	TM7SF2
Fold Change in COVID v Flu	0.134812	-0.0430601	-0.04186	0.0380154	0.0974945
GO Term	Cholesterol Biosynthesis Pathway WP197	Steroid Biosynthesis WP496	Gastric Cancer Network 2 WP2363	ATM Signaling Network in Development and Disease WP3878
Adjusted P-Value	0.000183455	0.00656208	0.0336231	0.0364482
P-Value	4.58637e-05	0.00328104	0.0252174	0.0364482
377th TOP pathway, peak marker MYLK	MYLK	MYL12A	CALM1	SLC25A16	MYL5	MYLK4	OTOGL
Fold Change in COVID v Flu	0.152998	-0.143524	0.0140811	0.0141827	0.0176616	-0.119777	-0.0355789
GO Term	Focal Adhesion WP306	Endothelin Pathways WP2197	MicroRNAs in cardiomyocyte hypertrophy WP1544	NO/cGMP/PKG mediated Neuroprotection WP4008	Glycogen Synthesis and Degradation WP500
Adjusted P-Value	0.000188061	0.00242033	0.0163079	0.0806615	0.0826501
P-Value	8.95529e-06	0.000230507	0.00232969	0.0384103	0.0354215
378th TOP pathway, peak marker DGAT2	DGAT2	DGAT1	FITM2	CD36
Fold Change in COVID v Flu	-0.120319	-0.0529401	0.0770861	-0.0348172
GO Term	Vitamin A and Carotenoid Metabolism WP716	Triacylglyceride Synthesis WP325	Statin Pathway WP430	PPAR signaling pathway WP3942	Aryl Hydrocarbon Receptor WP2586
Adjusted P-Value	0.000189024	0.000215665	0.0173894	0.0268551	0.0312994
P-Value	7.56097e-05	4.3133e-05	0.0104336	0.0268551	0.0250395
379th TOP pathway, peak marker TBX21	TBX21	GATA3
Fold Change in COVID v Flu	0.0948421	0.0354511
GO Term	Development and heterogeneity of the ILC family WP3893	Transcriptional cascade regulating adipogenesis WP4211	Notch Signaling Pathway WP61	IL-4 Signaling Pathway WP395	Preimplantation Embryo WP3527
Adjusted P-Value	0.00019215	0.0295233	0.0391864	0.0424694	0.0441757
P-Value	1.60125e-05	0.00492055	0.0228587	0.0212347	0.0147252
380th TOP pathway, peak marker PPAT	PPAT	PRPS1	GART	PRPS2	PRPSAP2
Fold Change in COVID v Flu	0.190839	0.0263507	0.0270291	0.133428	0.0205681
GO Term	Purine metabolism WP4224	Nucleotide Metabolism WP404	Metabolic reprogramming in colon cancer WP4290	Disorders of Folate Metabolism and Transport WP4259	Fluoropyrimidine Activity WP1601
Adjusted P-Value	0.000194198	0.000301229	0.00095719	0.0171831	0.0275391
P-Value	2.77426e-05	8.60654e-05	0.000410224	0.00981889	0.023605
381th TOP pathway, peak marker LRP2	LRP2	CLCN5	LRPAP1	CUBN
Fold Change in COVID v Flu	-0.181507	-0.0330258	-0.0250542	0.0452489
GO Term	Vitamin B12 Metabolism WP1533	Vitamin B12 Disorders WP4271	Hedgehog Signaling Pathway WP4249	Human Complement System WP2806
Adjusted P-Value	0.000200577	0.00984109	0.0207201	0.0277226
P-Value	5.01443e-05	0.00492055	0.0155401	0.0277226
382th TOP pathway, peak marker PIP4K2A	PIP4K2A	PIP4K2C	PIP4P2	PIP4K2B	PLCD3
Fold Change in COVID v Flu	-0.153688	-0.0917883	-0.0400902	0.0264005	0.0645344
GO Term	Regulation of Actin Cytoskeleton WP51	GPR40 Pathway WP3958	G13 Signaling Pathway WP524	Resistin as a regulator of inflammation WP4481
Adjusted P-Value	0.000201553	0.0212677	0.0284361	0.0336231
P-Value	5.03882e-05	0.0106339	0.0284361	0.0252174
383th TOP pathway, peak marker POU5F1	POU5F1	POU5F1B	KLF4	ESRRB	SALL4	ZNF281	DPPA4	L1TD1	TFCP2L1	PAX9
Fold Change in COVID v Flu	-0.129363	-0.117113	-0.0948795	-0.057043	-0.0418486	-0.0316909	0.0662751	-0.0343786	-0.0330922	-0.00480681
GO Term	let-7 inhibition of ES cell reprogramming WP3299	Mesodermal Commitment Pathway WP2857	Endoderm Differentiation WP2853	Preimplantation Embryo WP3527	Wnt Signaling Pathway and Pluripotency WP399
Adjusted P-Value	0.000201931	0.00129779	0.00194669	0.00312678	0.0154361
P-Value	1.26207e-05	0.000243336	0.000243336	0.000781695	0.00482379
384th TOP pathway, peak marker E2F1	E2F1	RB1
Fold Change in COVID v Flu	0.360984	0.00215103
GO Term	H19 action Rb-E2F1 signaling and CDK-Beta-catenin activity WP3969	The effect of progerin on the involved genes in Hutchinson-Gilford Progeria Syndrome WP4320	Integrated Cancer Pathway WP1971	Aryl Hydrocarbon Receptor WP2586	Prader-Willi and Angelman Syndrome WP3998
Adjusted P-Value	0.000210353	0.000372163	0.000405874	0.000442281	0.000499589
P-Value	6.57354e-06	2.32602e-05	7.61013e-05	6.91064e-05	6.24486e-05
385th TOP pathway, peak marker C5	C5	C5AR1	C8G	WFDC1
Fold Change in COVID v Flu	-0.281347	-0.0617154	0.010282	0.0613323
GO Term	Complement Activation WP545	Oxidative Damage WP3941	Complement and Coagulation Cascades WP558	Human Complement System WP2806	Cells and Molecules involved in local acute inflammatory response WP4493
Adjusted P-Value	0.000211998	0.000523147	0.000784721	0.00114148	0.0108152
P-Value	2.64997e-05	0.00019618	0.00019618	0.000570739	0.0067595
386th TOP pathway, peak marker NEFL	NEFL	NEFM
Fold Change in COVID v Flu	0.172604	-0.0280192
GO Term	Amyotrophic lateral sclerosis (ALS) WP2447	Association Between Physico-Chemical Features and Toxicity Associated Pathways WP3680	Ciliary landscape WP4352	NO/cGMP/PKG mediated Neuroprotection WP4008
Adjusted P-Value	0.000212376	0.000288393	0.00234962	0.0155401
P-Value	5.3094e-05	0.000144196	0.00176221	0.0155401
387th TOP pathway, peak marker HDAC4	HDAC4	ANKRA2	HDAC5
Fold Change in COVID v Flu	-0.0854279	0.00488231	-0.00476541
GO Term	Initiation of transcription and translation elongation at the HIV-1 LTR WP3414	Ethanol effects on histone modifications WP3996	Cardiac Hypertrophic Response WP2795	Neural Crest Differentiation WP2064	MicroRNAs in cardiomyocyte hypertrophy WP1544
Adjusted P-Value	0.000219961	0.000303394	0.000412953	0.000559004	0.000576449
P-Value	3.66601e-05	2.52828e-05	0.000103238	0.000186335	0.000240187
388th TOP pathway, peak marker ALDH6A1	ALDH6A1	HIBADH	HIBCH
Fold Change in COVID v Flu	0.0826927	0.0253416	-0.0115249
GO Term	Amino Acid metabolism WP3925
Adjusted P-Value	0.000221478
P-Value	0.000221478
389th TOP pathway, peak marker DHCR24	DHCR24	SOAT1	DHCR7	SC5D
Fold Change in COVID v Flu	0.217809	-0.0420269	0.100564	0.0878691
GO Term	Cholesterol Biosynthesis Pathway WP197	Oxysterols derived from cholesterol WP4545	Vitamin D Metabolism WP1531	Statin Pathway WP430	Tryptophan metabolism WP465
Adjusted P-Value	0.000229319	0.012285	0.0143413	0.0173608	0.0268277
P-Value	4.58637e-05	0.00737098	0.00573651	0.0138887	0.0268277
390th TOP pathway, peak marker MT2A	MT2A	MT1X	EOLA1
Fold Change in COVID v Flu	-0.368779	-0.0327831	-0.00808997
GO Term	Zinc homeostasis WP3529	Copper homeostasis WP3286	Phase I biotransformations, non P450 WP136	Irinotecan Pathway WP229	Fluoropyrimidine Activity WP1601
Adjusted P-Value	0.000232602	0.000380507	0.00683901	0.00717948	0.0169579
P-Value	2.32602e-05	7.61013e-05	0.0020517	0.00287179	0.0118705
391th TOP pathway, peak marker CD80	CD80	CD28
Fold Change in COVID v Flu	0.112801	0.0912631
GO Term	Inflammatory Response Pathway WP453	Allograft Rejection WP2328	T-Cell Receptor and Co-stimulatory Signaling WP2583	Selective expression of chemokine receptors during T-cell polarization WP4494	PI3K/AKT/mTOR - VitD3 Signalling WP4141
Adjusted P-Value	0.00023454	0.000876514	0.0243192	0.0259061	0.0300453
P-Value	2.13219e-05	0.000159366	0.0110542	0.00942039	0.00819417
392th TOP pathway, peak marker SLC27A1	SLC27A1	SLC27A4
Fold Change in COVID v Flu	-0.119235	0.0394953
GO Term	PPAR signaling pathway WP3942	PPAR Alpha Pathway WP2878	Nuclear Receptors Meta-Pathway WP2882
Adjusted P-Value	0.000239176	0.00983705	0.0941525
P-Value	7.97252e-05	0.00655803	0.0941525
393th TOP pathway, peak marker ELN	ELN	LOXL4	LOXL2	FBLN5	LTBP2	EFEMP2
Fold Change in COVID v Flu	-0.130064	0.0440741	0.0755839	0.0994553	-0.09899	-0.0283669
GO Term	Canonical and Non-Canonical TGF-B signaling WP3874	Hypothesized Pathways in Pathogenesis of Cardiovascular Disease WP3668	Simplified Interaction Map Between LOXL4 and Oxidative Stress Pathway WP3670	Lung fibrosis WP3624
Adjusted P-Value	0.000241786	0.0228473	0.0277774	0.0388421
P-Value	6.04465e-05	0.0171355	0.0138887	0.0388421
394th TOP pathway, peak marker TXN2	TXN2	TXNRD2	PRDX3
Fold Change in COVID v Flu	-0.0597935	-0.0573483	0.0384257
GO Term	Oxidative Stress WP408	Selenium Micronutrient Network WP15	Selenium Metabolism and Selenoproteins WP28
Adjusted P-Value	0.000245698	0.000758064	0.0232217
P-Value	8.18993e-05	0.000505376	0.0232217
395th TOP pathway, peak marker LRP5	LRP5	WNT7B	MESD	WNT9A
Fold Change in COVID v Flu	0.0951508	-0.0640813	0.0197958	0.0276657
GO Term	Epithelial to mesenchymal transition in colorectal cancer WP4239	Wnt Signaling in Kidney Disease WP4150	Wnt Signaling WP428	Wnt Signaling Pathway and Pluripotency WP399	LncRNA involvement in canonical Wnt signaling and colorectal cancer WP4258
Adjusted P-Value	0.000247442	0.000878239	0.0024387	0.00250095	0.00267473
P-Value	1.64961e-05	0.000117098	0.00113806	0.00100038	0.000713262
396th TOP pathway, peak marker NOD1	NOD1	RIPK2
Fold Change in COVID v Flu	-0.129283	-0.0350183
GO Term	Nucleotide-binding Oligomerization Domain (NOD) pathway WP1433	Apoptosis-related network due to altered Notch3 in ovarian cancer WP2864	Fas Ligand (FasL) pathway and Stress induction of Heat Shock Proteins (HSP) regulation WP314	T-Cell antigen Receptor (TCR) Signaling Pathway WP69
Adjusted P-Value	0.000249794	0.028313	0.0335235	0.0345924
P-Value	6.24486e-05	0.0212347	0.0167618	0.0345924
397th TOP pathway, peak marker RFK	RFK	FLAD1	TMEM161B
Fold Change in COVID v Flu	0.0852087	0.0183048	0.03718
GO Term	Selenium Micronutrient Network WP15	Folate Metabolism WP176	TNF alpha Signaling Pathway WP231
Adjusted P-Value	0.000254851	0.00028519	0.035399
P-Value	0.000169901	9.50635e-05	0.035399
398th TOP pathway, peak marker TLE1	TLE1	HES6
Fold Change in COVID v Flu	-0.131765	0.070107
GO Term	Notch Signaling Pathway WP61	Hematopoietic Stem Cell Differentiation WP2849
Adjusted P-Value	0.00025957	0.0196094
P-Value	0.000129785	0.0196094
399th TOP pathway, peak marker CTPS1	CTPS1	CTPS2	TIGD3	TMEM164	FAM156A
Fold Change in COVID v Flu	0.148322	0.0983571	0.0134288	0.0460535	-0.0385847
GO Term	Pyrimidine metabolism WP4022
Adjusted P-Value	0.000266313
P-Value	0.000266313
400th TOP pathway, peak marker CMPK1	CMPK1	NME4
Fold Change in COVID v Flu	0.142027	0.127661
GO Term	Pyrimidine metabolism WP4022
Adjusted P-Value	0.000266313
P-Value	0.000266313
[truncated: 18,974 more rows]
[truncated: 155 more columns]
